# Supplementary material for: Whole-Genome Analyses of Korean Native and Holstein Cattle Breeds by Massively Parallel Sequencing
Source: PubMed Central journal article supplement (PMC4081042; doi:10.1371/journal.pone.0101127), 2014-07-03

**Supplementary Fig. S1.** Distribution of mapped reads on the bovine reference assembly UMD3 for the Hanwoo, Jeju Heugu, and Korean Holstein samples.

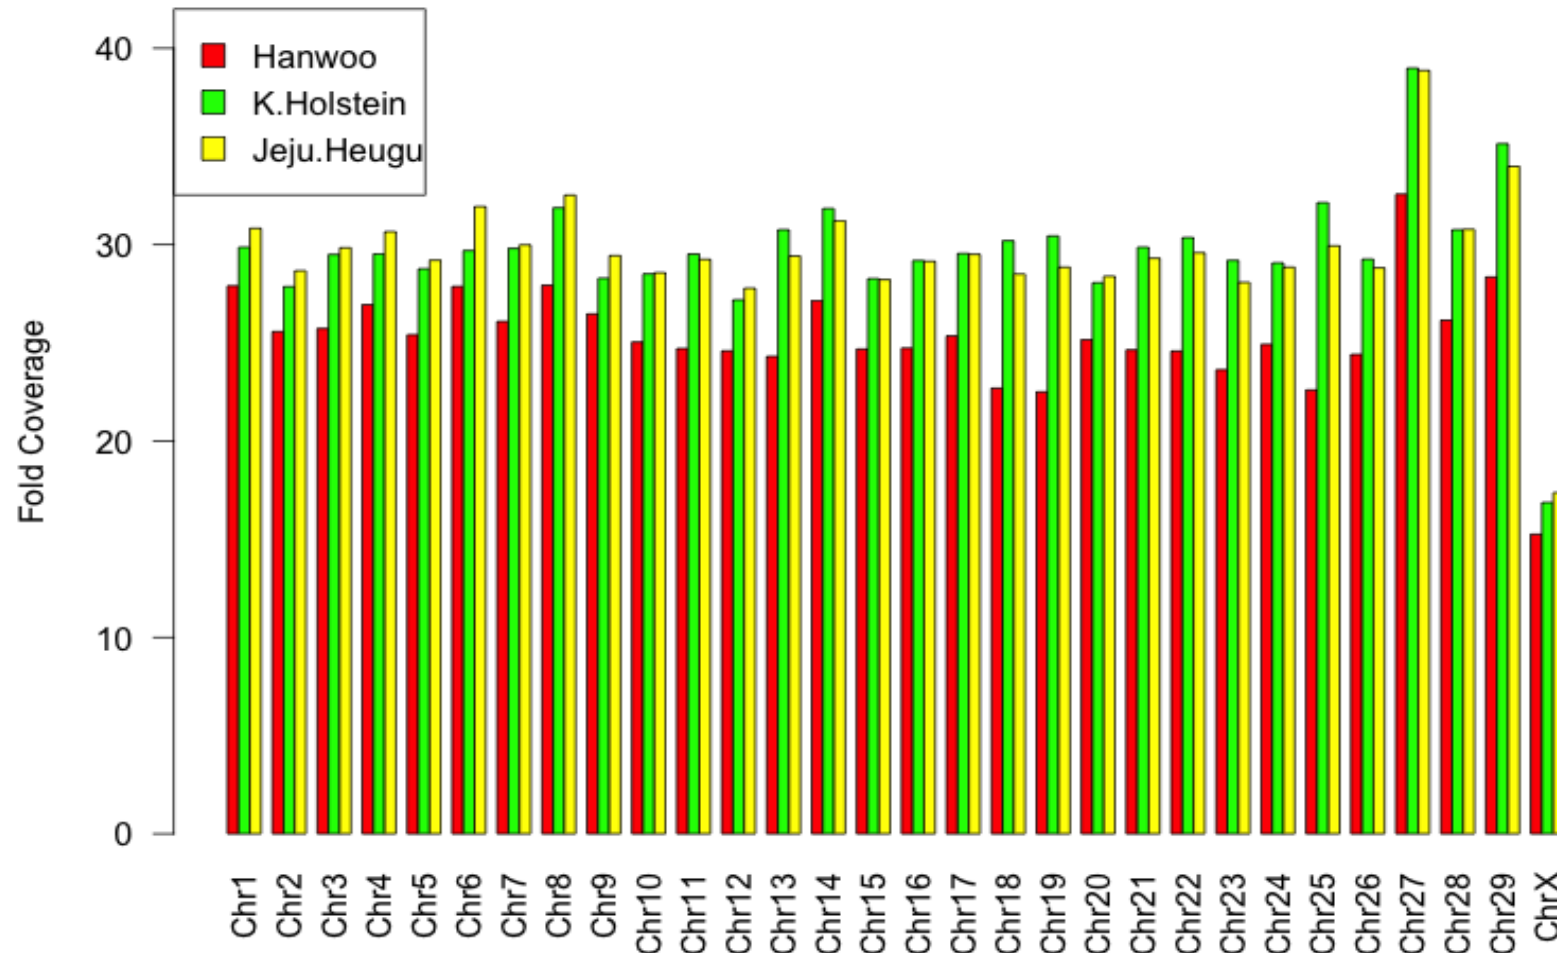

Supplement: pone.0101127.s001.pdf [file pone.0101127.s001.pdf]
