# Supplementary material for: Whole-Genome Analyses of Korean Native and Holstein Cattle Breeds by Massively Parallel Sequencing
Source: PubMed Central journal article supplement (PMC4081042; doi:10.1371/journal.pone.0101127), 2014-07-03

**Supplementary Fig. S2.** Histograms of InDel characteristics. (A) Read depth. (B) Number of alternative allele reads.

**A**

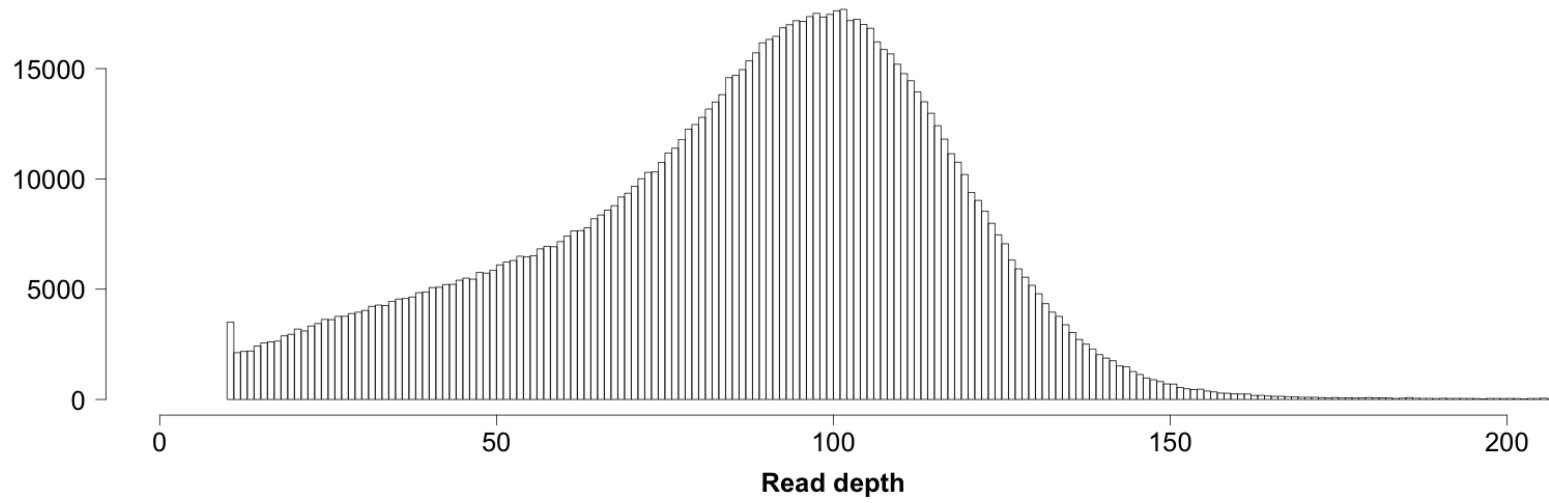

**B**

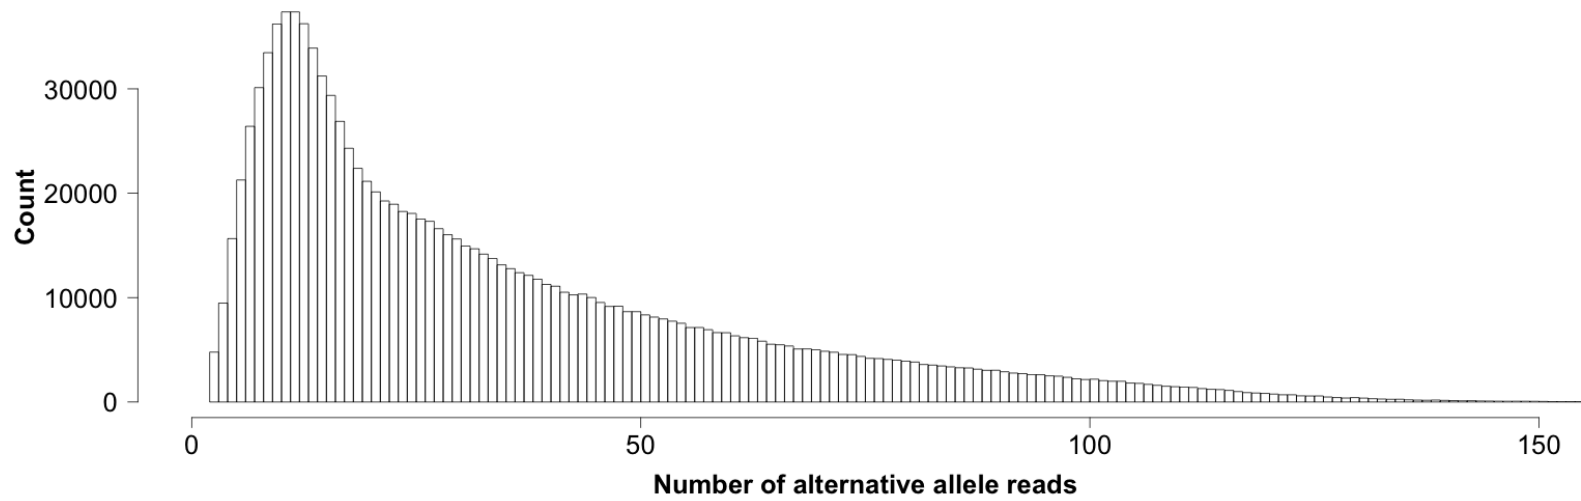

Supplement: pone.0101127.s002.pdf [file pone.0101127.s002.pdf]
