# Supplementary material for: Whole-Genome Analyses of Korean Native and Holstein Cattle Breeds by Massively Parallel Sequencing
Source: PubMed Central journal article supplement (PMC4081042; doi:10.1371/journal.pone.0101127), 2014-07-03

**Supplementary Fig. S3.** Venn diagram showing the overlap of all detected ROH in the Hanwoo, Jeju Heugu, Chikso, and Korean Holstein genomes.

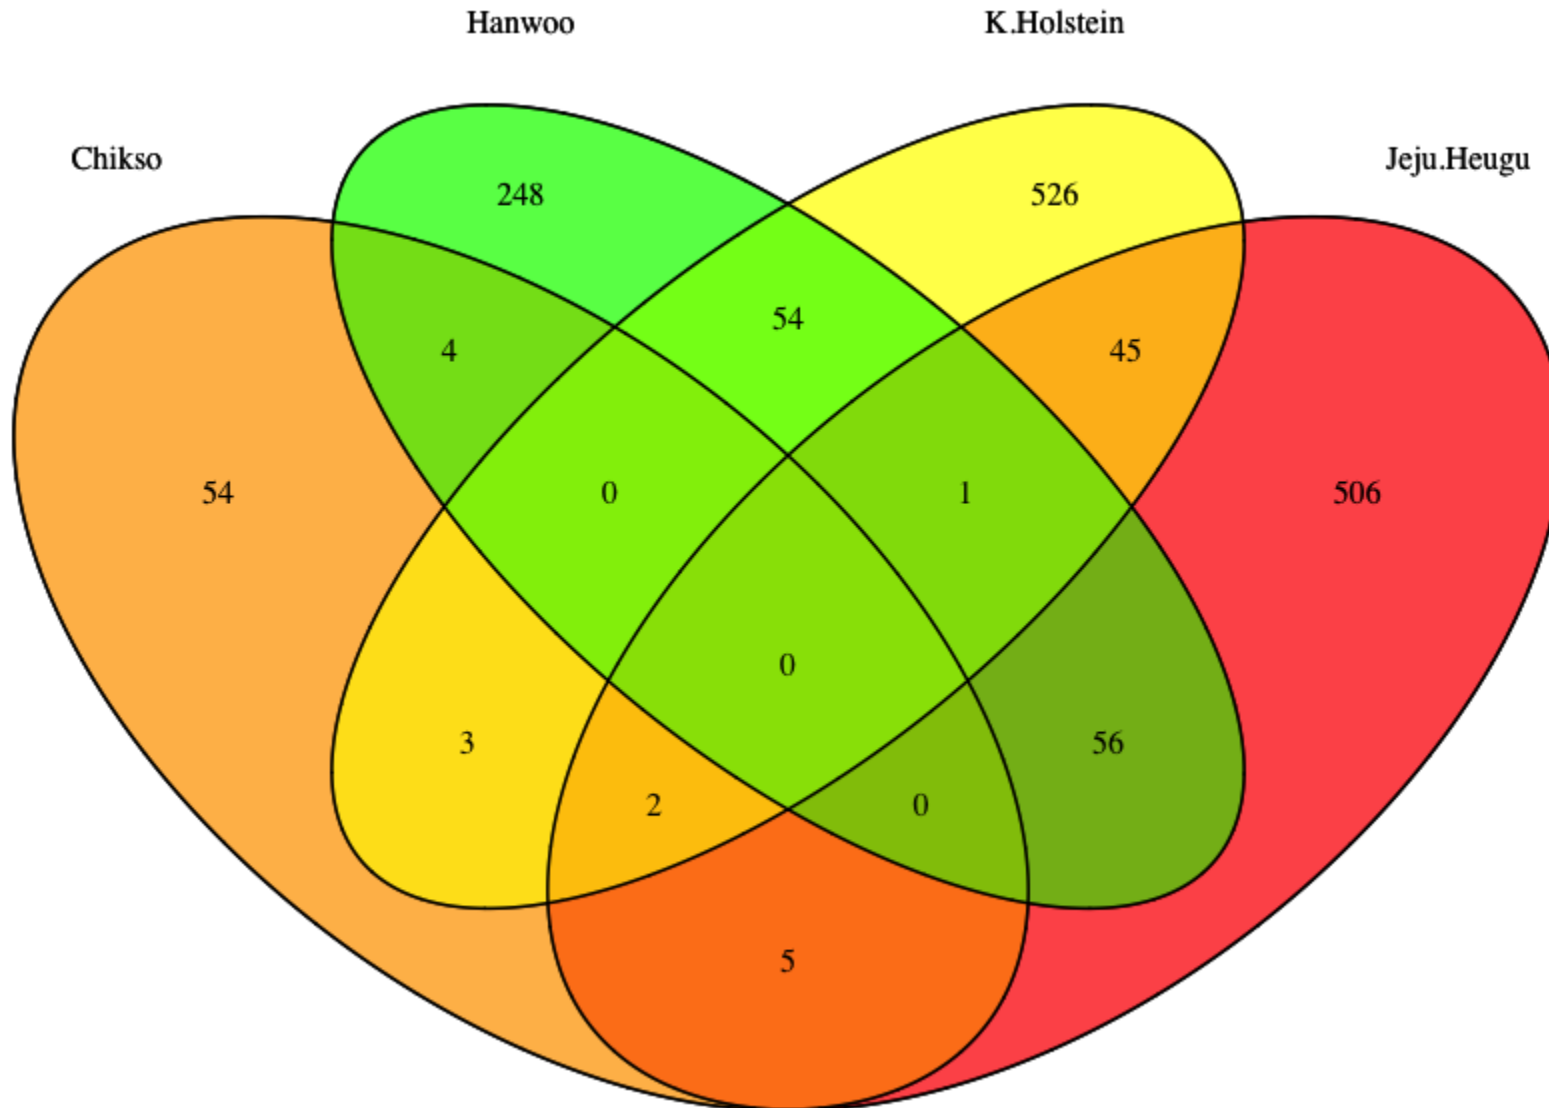

Supplement: pone.0101127.s003.pdf [file pone.0101127.s003.pdf]
