# Supplementary material for: Whole-Genome Analyses of Korean Native and Holstein Cattle Breeds by Massively Parallel Sequencing
Source: PubMed Central journal article supplement (PMC4081042; doi:10.1371/journal.pone.0101127), 2014-07-03
Supplement: pone.0101127.s004.pdf [file pone.0101127.s004.pdf]

**Supplementary Table S1. CNVRs detected from HANvsHOL**

| cnv_name      | chr   | start     | end       | size   | log2       | Ratio      | pvalue    | Hanwoo | Holstein |
|---------------|-------|-----------|-----------|--------|------------|------------|-----------|--------|----------|
| Chr1_CNVR_10  | Chr1  | 1414891   | 1424443   | 9553   | -1.43895   | 0.368836   | 0         | Loss   | Gain     |
| Chr1_CNVR_11  | Chr1  | 2309595   | 2319943   | 10349  | -0.8086313 | 0.570923   | 8.57E-200 | Loss   | Gain     |
| Chr1_CNVR_1   | Chr1  | 12913111  | 12926643  | 13533  | 1.049404   | 2.06967    | 0         | Gain   | Loss     |
| Chr1_CNVR_12  | Chr1  | 12926643  | 12938583  | 11941  | -1.679722  | 0.312143   | 0         | Loss   | Gain     |
| Chr1_CNVR_13  | Chr1  | 16020695  | 16028655  | 7961   | -3.860569  | 0.0688419  | 0         | Loss   | Gain     |
| Chr1_CNVR_2   | Chr1  | 24985247  | 24997187  | 11941  | 1.027238   | 2.03812    | 0         | Gain   | Loss     |
| Chr1_CNVR_14  | Chr1  | 26473767  | 26506403  | 32637  | -1.116228  | 0.461298   | 0         | Loss   | Gain     |
| Chr1_CNVR_3   | Chr1  | 32403171  | 32411131  | 7961   | 0.8564077  | 1.81052    | 1.84E-176 | Gain   | Loss     |
| Chr1_CNVR_15  | Chr1  | 42132679  | 42141435  | 8757   | -1.170738  | 0.444194   | 0         | Loss   | Gain     |
| Chr1_CNVR_4   | Chr1  | 46184319  | 46193075  | 8757   | 1.742877   | 3.34702    | 0         | Gain   | Loss     |
| Chr1_CNVR_16  | Chr1  | 57647515  | 57659455  | 11941  | -1.090717  | 0.469528   | 0         | Loss   | Gain     |
| Chr1_CNVR_17  | Chr1  | 68039295  | 68047255  | 7961   | -0.8103049 | 0.570261   | 1.03E-154 | Loss   | Gain     |
| Chr1_CNVR_18  | Chr1  | 69204639  | 69222947  | 18309  | -1.203864  | 0.434111   | 0         | Loss   | Gain     |
| Chr1_CNVR_5   | Chr1  | 76010439  | 76018399  | 7961   | 1.204884   | 2.30519    | 0         | Gain   | Loss     |
| Chr1_CNVR_6   | Chr1  | 93011407  | 93021755  | 10349  | 2.111294   | 4.32079    | 0         | Gain   | Loss     |
| Chr1_CNVR_19  | Chr1  | 93717459  | 93830491  | 113033 | -5.674269  | 0.0195828  | 0         | Loss   | Gain     |
| Chr1_CNVR_20  | Chr1  | 97519951  | 97544627  | 24677  | -1.046916  | 0.484002   | 0         | Loss   | Gain     |
| Chr1_CNVR_7   | Chr1  | 104072623 | 104082971 | 10349  | 2.175971   | 4.5189     | 0         | Gain   | Loss     |
| Chr1_CNVR_8   | Chr1  | 118624299 | 118636239 | 11941  | 1.132338   | 2.19214    | 0         | Gain   | Loss     |
| Chr1_CNVR_21  | Chr1  | 143523179 | 143537507 | 14329  | -0.8190849 | 0.566801   | 4.82E-282 | Loss   | Gain     |
| Chr1_CNVR_22  | Chr1  | 145065031 | 145073787 | 8757   | -0.8057543 | 0.572063   | 2.48E-168 | Loss   | Gain     |
| Chr1_CNVR_23  | Chr1  | 145823619 | 145835559 | 11941  | -0.8341283 | 0.560922   | 6.49E-243 | Loss   | Gain     |
| Chr1_CNVR_24  | Chr1  | 146493851 | 146508179 | 14329  | -0.8506287 | 0.554543   | 4.68E-301 | Loss   | Gain     |
| Chr1_CNVR_25  | Chr1  | 146696035 | 146704791 | 8757   | -0.8217477 | 0.565756   | 3.76E-174 | Loss   | Gain     |
| Chr1_CNVR_9   | Chr1  | 148426539 | 148452011 | 25473  | 1.161778   | 2.23733    | 0         | Gain   | Loss     |
| Chr10_CNVR_1  | Chr10 | 22586347  | 22606494  | 20148  | 1.520303   | 2.86851    | 0         | Gain   | Loss     |
| Chr10_CNVR_2  | Chr10 | 22708111  | 22736142  | 28032  | 2.336524   | 5.05084    | 0         | Gain   | Loss     |
| Chr10_CNVR_3  | Chr10 | 23301163  | 23313426  | 12264  | 1.436241   | 2.70615    | 0         | Gain   | Loss     |
| Chr10_CNVR_17 | Chr10 | 23324815  | 23346714  | 21900  | -1.018894  | 0.493495   | 0         | Loss   | Gain     |
| Chr10_CNVR_18 | Chr10 | 23369491  | 23430810  | 61320  | -2.529629  | 0.173183   | 0         | Loss   | Gain     |
| Chr10_CNVR_4  | Chr10 | 23668207  | 23683098  | 14892  | 5.945921   | 61.6454    | 0         | Gain   | Loss     |
| Chr10_CNVR_5  | Chr10 | 23685727  | 23715510  | 29784  | 3.683192   | 12.8455    | 0         | Gain   | Loss     |
| Chr10_CNVR_19 | Chr10 | 23716387  | 23734782  | 18396  | -1.918513  | 0.264527   | 0         | Loss   | Gain     |
| Chr10_CNVR_6  | Chr10 | 23888959  | 23897718  | 8760   | 0.9352845  | 1.91227    | 8.40E-212 | Gain   | Loss     |
| Chr10_CNVR_7  | Chr10 | 24006343  | 24015102  | 8760   | 1.0258     | 2.03609    | 1.46E-247 | Gain   | Loss     |
| Chr10_CNVR_20 | Chr10 | 24117595  | 24133362  | 15768  | -0.9192562 | 0.528782   | 0         | Loss   | Gain     |
| Chr10_CNVR_8  | Chr10 | 24344479  | 24360246  | 15768  | 0.8846552  | 1.84632    | 0         | Gain   | Loss     |
| Chr10_CNVR_9  | Chr10 | 24785107  | 24807006  | 21900  | 1.533146   | 2.89416    | 0         | Gain   | Loss     |
| Chr10_CNVR_21 | Chr10 | 25011115  | 25021626  | 10512  | -0.9996911 | 0.500107   | 4.89E-263 | Loss   | Gain     |
| Chr10_CNVR_22 | Chr10 | 25061047  | 25075938  | 14892  | -1.036728  | 0.487432   | 0         | Loss   | Gain     |
| Chr10_CNVR_10 | Chr10 | 25103095  | 25116234  | 13140  | 1.801027   | 3.48468    | 0         | Gain   | Loss     |
| Chr10_CNVR_11 | Chr10 | 25156531  | 25173174  | 16644  | 2.56611    | 5.9221     | 0         | Gain   | Loss     |
| Chr10_CNVR_12 | Chr10 | 27364051  | 27372810  | 8760   | 2.201696   | 4.6002     | 0         | Gain   | Loss     |
| Chr10_CNVR_13 | Chr10 | 27634735  | 27660138  | 25404  | 1.291688   | 2.44814    | 0         | Gain   | Loss     |
| Chr10_CNVR_23 | Chr10 | 32527195  | 32537706  | 10512  | -1.687531  | 0.310458   | 0         | Loss   | Gain     |
| Chr10_CNVR_14 | Chr10 | 41589415  | 41599050  | 9636   | 1.379538   | 2.60185    | 0         | Gain   | Loss     |
| Chr10_CNVR_15 | Chr10 | 53140351  | 53155242  | 14892  | 1.15841    | 2.23211    | 0         | Gain   | Loss     |
| Chr10_CNVR_24 | Chr10 | 55580887  | 55590522  | 9636   | -3.606443  | 0.0821018  | 0         | Loss   | Gain     |
| Chr10_CNVR_16 | Chr10 | 79246903  | 79263546  | 16644  | 1.332628   | 2.51861    | 0         | Gain   | Loss     |
| Chr10_CNVR_25 | Chr10 | 81029563  | 81038322  | 8760   | -0.8352986 | 0.560467   | 8.56E-163 | Loss   | Gain     |
| Chr10_CNVR_26 | Chr10 | 96710839  | 96720474  | 9636   | -2.290766  | 0.204367   | 0         | Loss   | Gain     |
| Chr11_CNVR_5  | Chr11 | 36297716  | 36308238  | 10523  | -6.82017   | 0.00884961 | 0         | Loss   | Gain     |

|               |       |           |           |        |            |           |           |      |      |
|---------------|-------|-----------|-----------|--------|------------|-----------|-----------|------|------|
| Chr11_CNVR_1  | Chr11 | 58444596  | 58459504  | 14909  | 1.102812   | 2.14773   | 0         | Gain | Loss |
| Chr11_CNVR_2  | Chr11 | 69356230  | 69378154  | 21925  | 1.156385   | 2.22898   | 0         | Gain | Loss |
| Chr11_CNVR_3  | Chr11 | 93517580  | 93526350  | 8771   | 1.691107   | 3.22904   | 0         | Gain | Loss |
| Chr11_CNVR_6  | Chr11 | 99327706  | 99395234  | 67529  | -1.521572  | 0.348306  | 0         | Loss | Gain |
| Chr11_CNVR_7  | Chr11 | 101203608 | 101212378 | 8771   | -0.7931926 | 0.577066  | 8.71E-149 | Loss | Gain |
| Chr11_CNVR_8  | Chr11 | 103807422 | 103817068 | 9647   | -0.9095568 | 0.532349  | 5.12E-206 | Loss | Gain |
| Chr11_CNVR_9  | Chr11 | 103891614 | 103900382 | 8769   | -0.8515886 | 0.554174  | 6.50E-168 | Loss | Gain |
| Chr11_CNVR_10 | Chr11 | 104035442 | 104046842 | 11401  | -0.9812349 | 0.506546  | 2.28E-275 | Loss | Gain |
| Chr11_CNVR_11 | Chr11 | 104061752 | 104071398 | 9647   | -0.8151192 | 0.568362  | 2.81E-171 | Loss | Gain |
| Chr11_CNVR_12 | Chr11 | 104099462 | 104114370 | 14909  | -0.8412499 | 0.55816   | 3.76E-278 | Loss | Gain |
| Chr11_CNVR_13 | Chr11 | 104311696 | 104320466 | 8771   | -0.8286283 | 0.563064  | 2.56E-160 | Loss | Gain |
| Chr11_CNVR_14 | Chr11 | 104437984 | 104448508 | 10525  | -0.9020836 | 0.535113  | 1.71E-221 | Loss | Gain |
| Chr11_CNVR_15 | Chr11 | 104457278 | 104466048 | 8771   | -0.8252405 | 0.564388  | 3.32E-159 | Loss | Gain |
| Chr11_CNVR_16 | Chr11 | 104485342 | 104495866 | 10525  | -0.9826502 | 0.506049  | 6.03E-255 | Loss | Gain |
| Chr11_CNVR_17 | Chr11 | 104522176 | 104530946 | 8771   | -0.8598362 | 0.551015  | 1.15E-170 | Loss | Gain |
| Chr11_CNVR_18 | Chr11 | 104533578 | 104547608 | 14031  | -0.8727144 | 0.546118  | 1.04E-278 | Loss | Gain |
| Chr11_CNVR_19 | Chr11 | 104593214 | 104606368 | 13155  | -0.8552135 | 0.552784  | 1.23E-252 | Loss | Gain |
| Chr11_CNVR_20 | Chr11 | 104639694 | 104649340 | 9647   | -0.9355099 | 0.522858  | 7.95E-216 | Loss | Gain |
| Chr11_CNVR_21 | Chr11 | 104707224 | 104716870 | 9647   | -1.130859  | 0.456644  | 4.66E-292 | Loss | Gain |
| Chr11_CNVR_22 | Chr11 | 104725640 | 104735286 | 9647   | -0.8389458 | 0.559052  | 6.92E-180 | Loss | Gain |
| Chr11_CNVR_23 | Chr11 | 104801062 | 104811586 | 10525  | -0.8633759 | 0.549665  | 8.37E-206 | Loss | Gain |
| Chr11_CNVR_24 | Chr11 | 104851928 | 104861574 | 9647   | -0.7935025 | 0.576942  | 1.43E-163 | Loss | Gain |
| Chr11_CNVR_25 | Chr11 | 104891394 | 104901040 | 9647   | -0.8819829 | 0.542621  | 1.04E-195 | Loss | Gain |
| Chr11_CNVR_4  | Chr11 | 105125552 | 105134322 | 8771   | 2.031259   | 4.08761   | 0         | Gain | Loss |
| Chr11_CNVR_26 | Chr11 | 105682448 | 105694724 | 12277  | -0.8357809 | 0.56028   | 6.51E-227 | Loss | Gain |
| Chr11_CNVR_27 | Chr11 | 106232326 | 106246358 | 14033  | -0.8815878 | 0.54277   | 1.72E-283 | Loss | Gain |
| Chr11_CNVR_28 | Chr11 | 106313888 | 106322656 | 8769   | -0.9844574 | 0.505416  | 1.92E-213 | Loss | Gain |
| Chr11_CNVR_29 | Chr11 | 106354230 | 106365630 | 11401  | -0.8933305 | 0.53837   | 6.62E-236 | Loss | Gain |
| Chr11_CNVR_30 | Chr11 | 106540154 | 106552430 | 12277  | -0.8621783 | 0.550121  | 3.43E-239 | Loss | Gain |
| Chr11_CNVR_31 | Chr11 | 106624346 | 106633114 | 8769   | -0.8703248 | 0.547024  | 3.53E-174 | Loss | Gain |
| Chr11_CNVR_32 | Chr11 | 106650656 | 106660302 | 9647   | -0.8845842 | 0.541644  | 1.12E-196 | Loss | Gain |
| Chr12_CNVR_24 | Chr12 | 936166    | 946043    | 9878   | -4.122146  | 0.0574262 | 0         | Loss | Gain |
| Chr12_CNVR_1  | Chr12 | 6719286   | 6728265   | 8980   | 0.8250487  | 1.77159   | 7.08E-168 | Gain | Loss |
| Chr12_CNVR_25 | Chr12 | 9814692   | 9834447   | 19756  | -0.9571148 | 0.515086  | 0         | Loss | Gain |
| Chr12_CNVR_2  | Chr12 | 24262614  | 24273389  | 10776  | 0.9204577  | 1.89272   | 3.50E-243 | Gain | Loss |
| Chr12_CNVR_26 | Chr12 | 32023130  | 32040191  | 17062  | -1.191187  | 0.437942  | 0         | Loss | Gain |
| Chr12_CNVR_27 | Chr12 | 32041090  | 32056355  | 15266  | -1.163466  | 0.446439  | 0         | Loss | Gain |
| Chr12_CNVR_28 | Chr12 | 32086888  | 32096765  | 9878   | -1.021449  | 0.492621  | 2.49E-250 | Loss | Gain |
| Chr12_CNVR_29 | Chr12 | 32111134  | 32142563  | 31430  | -0.9498852 | 0.517674  | 0         | Loss | Gain |
| Chr12_CNVR_30 | Chr12 | 32156034  | 32189259  | 33226  | -1.021228  | 0.492697  | 0         | Loss | Gain |
| Chr12_CNVR_31 | Chr12 | 41376698  | 41388371  | 11674  | -3.782475  | 0.0726711 | 0         | Loss | Gain |
| Chr12_CNVR_3  | Chr12 | 70296788  | 70310257  | 13470  | 3.596825   | 12.0991   | 0         | Gain | Loss |
| Chr12_CNVR_4  | Chr12 | 70641620  | 70653293  | 11674  | 3.734793   | 13.3133   | 0         | Gain | Loss |
| Chr12_CNVR_5  | Chr12 | 70817628  | 70826607  | 8980   | 2.561492   | 5.90318   | 0         | Gain | Loss |
| Chr12_CNVR_6  | Chr12 | 70827506  | 70910121  | 82616  | 3.957161   | 15.5319   | 0         | Gain | Loss |
| Chr12_CNVR_7  | Chr12 | 70911918  | 70977471  | 65554  | 3.970727   | 15.6786   | 0         | Gain | Loss |
| Chr12_CNVR_8  | Chr12 | 70978370  | 70999023  | 20654  | 3.323052   | 10.0078   | 0         | Gain | Loss |
| Chr12_CNVR_9  | Chr12 | 71000820  | 71009799  | 8980   | 3.504576   | 11.3497   | 0         | Gain | Loss |
| Chr12_CNVR_10 | Chr12 | 71041230  | 71149887  | 108658 | 4.944914   | 30.8012   | 0         | Gain | Loss |
| Chr12_CNVR_11 | Chr12 | 71167848  | 71214543  | 46696  | 2.919148   | 7.56399   | 0         | Gain | Loss |
| Chr12_CNVR_32 | Chr12 | 71259444  | 71283689  | 24246  | -1.516125  | 0.349624  | 0         | Loss | Gain |
| Chr12_CNVR_33 | Chr12 | 71284588  | 71346549  | 61962  | -1.76356   | 0.294521  | 0         | Loss | Gain |
| Chr12_CNVR_34 | Chr12 | 71691382  | 71706647  | 15266  | -1.095321  | 0.468032  | 0         | Loss | Gain |
| Chr12_CNVR_35 | Chr12 | 71708444  | 71733587  | 25144  | -1.444223  | 0.36749   | 0         | Loss | Gain |
| Chr12_CNVR_36 | Chr12 | 71734486  | 71783875  | 49390  | -1.591141  | 0.331909  | 0         | Loss | Gain |
| Chr12_CNVR_37 | Chr12 | 71784774  | 71895227  | 110454 | -2.729543  | 0.150774  | 0         | Loss | Gain |

|               |       |          |          |        |            |           |           |      |      |
|---------------|-------|----------|----------|--------|------------|-----------|-----------|------|------|
| Chr12_CNVR_38 | Chr12 | 71915882 | 71927555 | 11674  | -0.9887806 | 0.503904  | 3.10E-280 | Loss | Gain |
| Chr12_CNVR_39 | Chr12 | 72029030 | 72051479 | 22450  | -4.517306  | 0.0436672 | 0         | Loss | Gain |
| Chr12_CNVR_40 | Chr12 | 72053276 | 72064051 | 10776  | -1.623926  | 0.324451  | 0         | Loss | Gain |
| Chr12_CNVR_12 | Chr12 | 72174506 | 72187077 | 12572  | 1.000595   | 2.00083   | 0         | Gain | Loss |
| Chr12_CNVR_41 | Chr12 | 72205936 | 72234671 | 28736  | -1.558274  | 0.339557  | 0         | Loss | Gain |
| Chr12_CNVR_13 | Chr12 | 72245448 | 72257121 | 11674  | 0.9341926  | 1.91082   | 4.93E-270 | Gain | Loss |
| Chr12_CNVR_14 | Chr12 | 72258918 | 72267897 | 8980   | 0.9560753  | 1.94003   | 1.44E-216 | Gain | Loss |
| Chr12_CNVR_15 | Chr12 | 72744736 | 72768981 | 24246  | 5.659184   | 50.5341   | 0         | Gain | Loss |
| Chr12_CNVR_16 | Chr12 | 72769880 | 72826453 | 56574  | 5.233499   | 37.6219   | 0         | Gain | Loss |
| Chr12_CNVR_17 | Chr12 | 72828250 | 72892007 | 63758  | 2.282084   | 4.8638    | 0         | Gain | Loss |
| Chr12_CNVR_18 | Chr12 | 72892906 | 72912661 | 19756  | 4.144003   | 17.6795   | 0         | Gain | Loss |
| Chr12_CNVR_42 | Chr12 | 72919846 | 72955765 | 35920  | -2.12525   | 0.229211  | 0         | Loss | Gain |
| Chr12_CNVR_43 | Chr12 | 72956664 | 72967439 | 10776  | -1.6855    | 0.310895  | 0         | Loss | Gain |
| Chr12_CNVR_44 | Chr12 | 72971032 | 72998869 | 27838  | -1.813287  | 0.284542  | 0         | Loss | Gain |
| Chr12_CNVR_45 | Chr12 | 73017728 | 73028503 | 10776  | -1.377312  | 0.384935  | 0         | Loss | Gain |
| Chr12_CNVR_46 | Chr12 | 73029402 | 73077893 | 48492  | -1.94234   | 0.260194  | 0         | Loss | Gain |
| Chr12_CNVR_47 | Chr12 | 73078792 | 73102139 | 23348  | -1.14406   | 0.452484  | 0         | Loss | Gain |
| Chr12_CNVR_48 | Chr12 | 73103936 | 73116507 | 12572  | -0.9462144 | 0.518993  | 1.59E-280 | Loss | Gain |
| Chr12_CNVR_49 | Chr12 | 73125488 | 73192837 | 67350  | -1.738212  | 0.299741  | 0         | Loss | Gain |
| Chr12_CNVR_50 | Chr12 | 73196430 | 73217083 | 20654  | -1.242361  | 0.42268   | 0         | Loss | Gain |
| Chr12_CNVR_51 | Chr12 | 73218880 | 73229655 | 10776  | -1.03014   | 0.489663  | 1.19E-276 | Loss | Gain |
| Chr12_CNVR_52 | Chr12 | 73239534 | 73276351 | 36818  | -2.264837  | 0.208073  | 0         | Loss | Gain |
| Chr12_CNVR_53 | Chr12 | 73287128 | 73302393 | 15266  | -1.822923  | 0.282648  | 0         | Loss | Gain |
| Chr12_CNVR_54 | Chr12 | 73329334 | 73347293 | 17960  | -1.460513  | 0.363364  | 0         | Loss | Gain |
| Chr12_CNVR_55 | Chr12 | 73372438 | 73404765 | 32328  | -1.592067  | 0.331696  | 0         | Loss | Gain |
| Chr12_CNVR_56 | Chr12 | 73489178 | 73504443 | 15266  | -1.250647  | 0.42026   | 0         | Loss | Gain |
| Chr12_CNVR_57 | Chr12 | 73518812 | 73531383 | 12572  | -1.817947  | 0.283624  | 0         | Loss | Gain |
| Chr12_CNVR_58 | Chr12 | 73549344 | 73571793 | 22450  | -2.75      | 0.148651  | 0         | Loss | Gain |
| Chr12_CNVR_59 | Chr12 | 73572692 | 73635551 | 62860  | -2.858039  | 0.137925  | 0         | Loss | Gain |
| Chr12_CNVR_60 | Chr12 | 73636450 | 73672369 | 35920  | -2.353658  | 0.195649  | 0         | Loss | Gain |
| Chr12_CNVR_61 | Chr12 | 73675962 | 73711881 | 35920  | -2.379681  | 0.192152  | 0         | Loss | Gain |
| Chr12_CNVR_62 | Chr12 | 73719066 | 73733433 | 14368  | -1.131869  | 0.456324  | 0         | Loss | Gain |
| Chr12_CNVR_63 | Chr12 | 73737026 | 73746903 | 9878   | -1.777604  | 0.291667  | 0         | Loss | Gain |
| Chr12_CNVR_64 | Chr12 | 73799886 | 73810661 | 10776  | -0.9560052 | 0.515482  | 6.81E-245 | Loss | Gain |
| Chr12_CNVR_65 | Chr12 | 73811560 | 73825029 | 13470  | -1.089087  | 0.470059  | 0         | Loss | Gain |
| Chr12_CNVR_66 | Chr12 | 73887890 | 73912135 | 24246  | -2.866681  | 0.137102  | 0         | Loss | Gain |
| Chr12_CNVR_67 | Chr12 | 73930994 | 73957933 | 26940  | -1.690993  | 0.309714  | 0         | Loss | Gain |
| Chr12_CNVR_68 | Chr12 | 74076470 | 74089939 | 13470  | -1.090753  | 0.469516  | 0         | Loss | Gain |
| Chr12_CNVR_69 | Chr12 | 74200394 | 74250681 | 50288  | -1.409991  | 0.376314  | 0         | Loss | Gain |
| Chr12_CNVR_70 | Chr12 | 74253376 | 74281213 | 27838  | -1.446323  | 0.366955  | 0         | Loss | Gain |
| Chr12_CNVR_71 | Chr12 | 74295582 | 74321623 | 26042  | -3.938987  | 0.0651999 | 0         | Loss | Gain |
| Chr12_CNVR_72 | Chr12 | 74364728 | 74379993 | 15266  | -2.33923   | 0.197616  | 0         | Loss | Gain |
| Chr12_CNVR_19 | Chr12 | 74420404 | 74443751 | 23348  | 2.928581   | 7.61361   | 0         | Gain | Loss |
| Chr12_CNVR_73 | Chr12 | 74521878 | 74530857 | 8980   | -0.938699  | 0.521703  | 2.41E-198 | Loss | Gain |
| Chr12_CNVR_74 | Chr12 | 74641312 | 74761643 | 120332 | -1.90078   | 0.267799  | 0         | Loss | Gain |
| Chr12_CNVR_75 | Chr12 | 74767930 | 75136109 | 368180 | -3.462519  | 0.0907148 | 0         | Loss | Gain |
| Chr12_CNVR_76 | Chr12 | 75137906 | 75217827 | 79922  | -2.200989  | 0.217488  | 0         | Loss | Gain |
| Chr12_CNVR_77 | Chr12 | 75219624 | 75235787 | 16164  | -1.548195  | 0.341938  | 0         | Loss | Gain |
| Chr12_CNVR_78 | Chr12 | 75445022 | 75575231 | 130210 | -1.473351  | 0.360145  | 0         | Loss | Gain |
| Chr12_CNVR_79 | Chr12 | 75580620 | 75619233 | 38614  | -1.124196  | 0.458758  | 0         | Loss | Gain |
| Chr12_CNVR_20 | Chr12 | 75885042 | 75903001 | 17960  | 2.269261   | 4.82076   | 0         | Gain | Loss |
| Chr12_CNVR_80 | Chr12 | 75946106 | 75957779 | 11674  | -1.17991   | 0.441379  | 0         | Loss | Gain |
| Chr12_CNVR_81 | Chr12 | 76046682 | 76062845 | 16164  | -1.423381  | 0.372838  | 0         | Loss | Gain |
| Chr12_CNVR_82 | Chr12 | 76063744 | 76074519 | 10776  | -1.594141  | 0.331219  | 0         | Loss | Gain |
| Chr12_CNVR_83 | Chr12 | 76075418 | 76121215 | 45798  | -1.573965  | 0.335884  | 0         | Loss | Gain |
| Chr12_CNVR_84 | Chr12 | 76170606 | 76182279 | 11674  | -1.688715  | 0.310203  | 0         | Loss | Gain |

|                |       |          |          |       |            |           |           |      |      |
|----------------|-------|----------|----------|-------|------------|-----------|-----------|------|------|
| Chr12_CNVR_85  | Chr12 | 76209220 | 76237955 | 28736 | -1.518957  | 0.348938  | 0         | Loss | Gain |
| Chr12_CNVR_86  | Chr12 | 76238854 | 76273875 | 35022 | -2.177196  | 0.221105  | 0         | Loss | Gain |
| Chr12_CNVR_21  | Chr12 | 76370860 | 76387921 | 17062 | 1.040631   | 2.05713   | 0         | Gain | Loss |
| Chr12_CNVR_22  | Chr12 | 76410372 | 76419351 | 8980  | 1.527952   | 2.88376   | 0         | Gain | Loss |
| Chr12_CNVR_87  | Chr12 | 76459762 | 76472333 | 12572 | -0.8850035 | 0.541486  | 8.75E-251 | Loss | Gain |
| Chr12_CNVR_88  | Chr12 | 76482212 | 76500171 | 17960 | -0.9456776 | 0.519186  | 0         | Loss | Gain |
| Chr12_CNVR_23  | Chr12 | 76501968 | 76513641 | 11674 | 1.11008    | 2.15858   | 0         | Gain | Loss |
| Chr12_CNVR_89  | Chr12 | 76530704 | 76553153 | 22450 | -2.06701   | 0.238654  | 0         | Loss | Gain |
| Chr12_CNVR_90  | Chr12 | 76554052 | 76577399 | 23348 | -0.9656009 | 0.512065  | 0         | Loss | Gain |
| Chr12_CNVR_91  | Chr12 | 76620504 | 76634871 | 14368 | -0.9411902 | 0.520803  | 0         | Loss | Gain |
| Chr12_CNVR_92  | Chr12 | 76635770 | 76651035 | 15266 | -1.382923  | 0.383441  | 0         | Loss | Gain |
| Chr12_CNVR_93  | Chr12 | 76652832 | 76664505 | 11674 | -1.079787  | 0.473099  | 0         | Loss | Gain |
| Chr12_CNVR_94  | Chr12 | 76669894 | 76693241 | 23348 | -1.130095  | 0.456886  | 0         | Loss | Gain |
| Chr12_CNVR_95  | Chr12 | 76694140 | 76709405 | 15266 | -1.027458  | 0.490574  | 0         | Loss | Gain |
| Chr12_CNVR_96  | Chr12 | 89003924 | 89014699 | 10776 | -0.8265605 | 0.563872  | 1.33E-191 | Loss | Gain |
| Chr12_CNVR_97  | Chr12 | 89335286 | 89345163 | 9878  | -0.8410477 | 0.558238  | 4.04E-181 | Loss | Gain |
| Chr12_CNVR_98  | Chr12 | 89454720 | 89463699 | 8980  | -0.8843271 | 0.54174   | 1.69E-179 | Loss | Gain |
| Chr12_CNVR_99  | Chr12 | 89660362 | 89671137 | 10776 | -0.8936179 | 0.538263  | 8.29E-219 | Loss | Gain |
| Chr12_CNVR_100 | Chr12 | 89768122 | 89777101 | 8980  | -0.8672383 | 0.548195  | 1.13E-173 | Loss | Gain |
| Chr12_CNVR_101 | Chr12 | 89905516 | 89920781 | 15266 | -0.8318139 | 0.561822  | 1.60E-273 | Loss | Gain |
| Chr12_CNVR_102 | Chr12 | 89930660 | 89943231 | 12572 | -0.8843645 | 0.541726  | 1.77E-250 | Loss | Gain |
| Chr12_CNVR_103 | Chr12 | 90136302 | 90146179 | 9878  | -0.8737459 | 0.545728  | 2.88E-193 | Loss | Gain |
| Chr12_CNVR_104 | Chr12 | 90163242 | 90176711 | 13470 | -0.8783272 | 0.543998  | 4.03E-265 | Loss | Gain |
| Chr12_CNVR_105 | Chr12 | 90229694 | 90241367 | 11674 | -0.7869724 | 0.579559  | 1.62E-190 | Loss | Gain |
| Chr12_CNVR_106 | Chr12 | 90245858 | 90254837 | 8980  | -0.835816  | 0.560266  | 4.31E-163 | Loss | Gain |
| Chr12_CNVR_107 | Chr12 | 90266512 | 90275491 | 8980  | -0.8724395 | 0.546222  | 1.93E-175 | Loss | Gain |
| Chr12_CNVR_108 | Chr12 | 90361700 | 90391333 | 29634 | -0.8702308 | 0.547059  | 0         | Loss | Gain |
| Chr12_CNVR_109 | Chr12 | 90392232 | 90404803 | 12572 | -0.9953748 | 0.501606  | 6.40E-305 | Loss | Gain |
| Chr12_CNVR_110 | Chr12 | 90421866 | 90438029 | 16164 | -0.891683  | 0.538985  | 0         | Loss | Gain |
| Chr12_CNVR_111 | Chr12 | 90539504 | 90551177 | 11674 | -0.8525769 | 0.553795  | 1.05E-218 | Loss | Gain |
| Chr12_CNVR_112 | Chr12 | 90584404 | 90594281 | 9878  | -0.8729098 | 0.546044  | 5.92E-193 | Loss | Gain |
| Chr12_CNVR_113 | Chr12 | 90634692 | 90643671 | 8980  | -0.8442835 | 0.556987  | 6.32E-166 | Loss | Gain |
| Chr12_CNVR_114 | Chr12 | 90654448 | 90663427 | 8980  | -0.9095214 | 0.532362  | 3.55E-188 | Loss | Gain |
| Chr12_CNVR_115 | Chr12 | 90746044 | 90756819 | 10776 | -0.8944794 | 0.537941  | 3.66E-219 | Loss | Gain |
| Chr12_CNVR_116 | Chr12 | 90764902 | 90773881 | 8980  | -0.9009735 | 0.535525  | 3.20E-185 | Loss | Gain |
| Chr12_CNVR_117 | Chr12 | 90792740 | 90803515 | 10776 | -0.8945683 | 0.537908  | 3.36E-219 | Loss | Gain |
| Chr12_CNVR_118 | Chr12 | 90807108 | 90816087 | 8980  | -0.8869432 | 0.540759  | 2.14E-180 | Loss | Gain |
| Chr12_CNVR_119 | Chr12 | 90924746 | 90940909 | 16164 | -0.8542394 | 0.553157  | 5.25E-303 | Loss | Gain |
| Chr12_CNVR_120 | Chr12 | 90948094 | 90957073 | 8980  | -0.8251149 | 0.564437  | 1.57E-159 | Loss | Gain |
| Chr13_CNVR_1   | Chr13 | 239529   | 263261   | 23733 | 2.390695   | 5.2441    | 0         | Gain | Loss |
| Chr13_CNVR_2   | Chr13 | 10995851 | 11004641 | 8791  | 1.787924   | 3.45318   | 0         | Gain | Loss |
| Chr13_CNVR_3   | Chr13 | 11009915 | 11030131 | 20217 | 1.101058   | 2.14512   | 0         | Gain | Loss |
| Chr13_CNVR_4   | Chr13 | 11037165 | 11047711 | 10547 | 1.096925   | 2.13898   | 0         | Gain | Loss |
| Chr13_CNVR_5   | Chr13 | 11066171 | 11081113 | 14943 | 1.328009   | 2.51056   | 0         | Gain | Loss |
| Chr13_CNVR_6   | Chr13 | 11090783 | 11103089 | 12307 | 1.204634   | 2.30479   | 0         | Gain | Loss |
| Chr13_CNVR_7   | Chr13 | 11113637 | 11138249 | 24613 | 1.148562   | 2.21693   | 0         | Gain | Loss |
| Chr13_CNVR_8   | Chr13 | 11176047 | 11184835 | 8789  | 0.7997144  | 1.74076   | 2.85E-169 | Gain | Loss |
| Chr13_CNVR_9   | Chr13 | 11340419 | 11365031 | 24613 | 1.149645   | 2.21859   | 0         | Gain | Loss |
| Chr13_CNVR_10  | Chr13 | 11367669 | 11384369 | 16701 | 0.9337732  | 1.91027   | 0         | Gain | Loss |
| Chr13_CNVR_11  | Chr13 | 11437989 | 11459963 | 21975 | 1.056078   | 2.07927   | 0         | Gain | Loss |
| Chr13_CNVR_12  | Chr13 | 11483697 | 11502155 | 18459 | 0.8761038  | 1.83541   | 0         | Gain | Loss |
| Chr13_CNVR_13  | Chr13 | 17837987 | 17863477 | 25491 | 1.056678   | 2.08014   | 0         | Gain | Loss |
| Chr13_CNVR_14  | Chr13 | 23349317 | 23360743 | 11427 | 1.043999   | 2.06194   | 0         | Gain | Loss |
| Chr13_CNVR_16  | Chr13 | 53932365 | 53984225 | 51861 | -5.117468  | 0.0288064 | 0         | Loss | Gain |
| Chr13_CNVR_17  | Chr13 | 63029135 | 63066053 | 36919 | -1.193735  | 0.43717   | 0         | Loss | Gain |
| Chr13_CNVR_15  | Chr13 | 70139367 | 70149913 | 10547 | 4.261599   | 19.1809   | 0         | Gain | Loss |

|               |       |          |          |        |            |          |           |      |      |
|---------------|-------|----------|----------|--------|------------|----------|-----------|------|------|
| Chr14_CNVR_10 | Chr14 | 1638086  | 1646105  | 8020   | -0.8352489 | 0.560486 | 1.22E-162 | Loss | Gain |
| Chr14_CNVR_11 | Chr14 | 2137732  | 2147355  | 9624   | -1.259619  | 0.417654 | 0         | Loss | Gain |
| Chr14_CNVR_12 | Chr14 | 2161792  | 2171415  | 9624   | -0.8569804 | 0.552107 | 1.95E-203 | Loss | Gain |
| Chr14_CNVR_13 | Chr14 | 2505048  | 2513067  | 8020   | -0.8358573 | 0.56025  | 7.65E-163 | Loss | Gain |
| Chr14_CNVR_14 | Chr14 | 2913266  | 2926097  | 12832  | -0.9032635 | 0.534676 | 1.34E-295 | Loss | Gain |
| Chr14_CNVR_15 | Chr14 | 3559678  | 3567697  | 8020   | -0.8090459 | 0.570759 | 4.93E-154 | Loss | Gain |
| Chr14_CNVR_16 | Chr14 | 3653512  | 3662333  | 8822   | -0.90665   | 0.533422 | 3.65E-205 | Loss | Gain |
| Chr14_CNVR_17 | Chr14 | 3699226  | 3708047  | 8822   | -0.85034   | 0.554654 | 3.24E-184 | Loss | Gain |
| Chr14_CNVR_18 | Chr14 | 11400030 | 11412059 | 12030  | -0.9551136 | 0.515801 | 3.94E-304 | Loss | Gain |
| Chr14_CNVR_19 | Chr14 | 11417674 | 11434515 | 16842  | -1.059657  | 0.479746 | 0         | Loss | Gain |
| Chr14_CNVR_20 | Chr14 | 14498156 | 14508581 | 10426  | -0.9452049 | 0.519356 | 2.21E-259 | Loss | Gain |
| Chr14_CNVR_21 | Chr14 | 14541464 | 14561513 | 20050  | -0.8782965 | 0.544009 | 0         | Loss | Gain |
| Chr14_CNVR_22 | Chr14 | 14566326 | 14576751 | 10426  | -0.9872489 | 0.504439 | 1.60E-278 | Loss | Gain |
| Chr14_CNVR_23 | Chr14 | 14583970 | 14599207 | 15238  | -0.9999236 | 0.500026 | 0         | Loss | Gain |
| Chr14_CNVR_24 | Chr14 | 14608030 | 14619257 | 11228  | -1.795914  | 0.287989 | 0         | Loss | Gain |
| Chr14_CNVR_25 | Chr14 | 14620060 | 14641713 | 21654  | -1.307519  | 0.404015 | 0         | Loss | Gain |
| Chr14_CNVR_26 | Chr14 | 14644120 | 14695447 | 51328  | -1.106695  | 0.464357 | 0         | Loss | Gain |
| Chr14_CNVR_27 | Chr14 | 14696250 | 14718705 | 22456  | -1.151278  | 0.450226 | 0         | Loss | Gain |
| Chr14_CNVR_28 | Chr14 | 14719508 | 14749181 | 29674  | -1.063848  | 0.478354 | 0         | Loss | Gain |
| Chr14_CNVR_29 | Chr14 | 14749984 | 14764419 | 14436  | -1.060174  | 0.479574 | 0         | Loss | Gain |
| Chr14_CNVR_30 | Chr14 | 14766024 | 14786875 | 20852  | -1.054465  | 0.481476 | 0         | Loss | Gain |
| Chr14_CNVR_31 | Chr14 | 14787678 | 14801311 | 13634  | -1.098439  | 0.467022 | 0         | Loss | Gain |
| Chr14_CNVR_32 | Chr14 | 14803718 | 14816549 | 12832  | -1.075748  | 0.474425 | 0         | Loss | Gain |
| Chr14_CNVR_33 | Chr14 | 14817352 | 14845421 | 28070  | -1.026061  | 0.491049 | 0         | Loss | Gain |
| Chr14_CNVR_34 | Chr14 | 14846224 | 14861461 | 15238  | -1.105656  | 0.464691 | 0         | Loss | Gain |
| Chr14_CNVR_35 | Chr14 | 14867878 | 14887927 | 20050  | -1.06911   | 0.476613 | 0         | Loss | Gain |
| Chr14_CNVR_36 | Chr14 | 14891136 | 14936849 | 45714  | -1.238097  | 0.423931 | 0         | Loss | Gain |
| Chr14_CNVR_37 | Chr14 | 15015446 | 15033089 | 17644  | -1.30111   | 0.405814 | 0         | Loss | Gain |
| Chr14_CNVR_38 | Chr14 | 15036298 | 15049129 | 12832  | -1.055574  | 0.481106 | 0         | Loss | Gain |
| Chr14_CNVR_39 | Chr14 | 15057952 | 15187875 | 129924 | -1.035325  | 0.487906 | 0         | Loss | Gain |
| Chr14_CNVR_40 | Chr14 | 15189480 | 15198301 | 8822   | -0.9713166 | 0.51004  | 7.74E-230 | Loss | Gain |
| Chr14_CNVR_41 | Chr14 | 15234392 | 15242411 | 8020   | -1.005339  | 0.498153 | 3.91E-221 | Loss | Gain |
| Chr14_CNVR_42 | Chr14 | 15278502 | 15287323 | 8822   | -1.115998  | 0.461372 | 1.05E-286 | Loss | Gain |
| Chr14_CNVR_43 | Chr14 | 15288928 | 15316997 | 28070  | -1.04273   | 0.485408 | 0         | Loss | Gain |
| Chr14_CNVR_44 | Chr14 | 15318602 | 15391583 | 72982  | -1.084929  | 0.471415 | 0         | Loss | Gain |
| Chr14_CNVR_45 | Chr14 | 15395594 | 15407623 | 12030  | -1.256188  | 0.418649 | 0         | Loss | Gain |
| Chr14_CNVR_1  | Chr14 | 30723418 | 30732239 | 8822   | 1.060396   | 2.0855   | 3.21E-292 | Gain | Loss |
| Chr14_CNVR_2  | Chr14 | 32270476 | 32292931 | 22456  | 2.329922   | 5.02778  | 0         | Gain | Loss |
| Chr14_CNVR_46 | Chr14 | 32534334 | 32543957 | 9624   | -0.889442  | 0.539823 | 1.41E-216 | Loss | Gain |
| Chr14_CNVR_3  | Chr14 | 44857866 | 44867489 | 9624   | 2.016272   | 4.04537  | 0         | Gain | Loss |
| Chr14_CNVR_4  | Chr14 | 53283678 | 53291697 | 8020   | 0.8921434  | 1.85593  | 3.18E-198 | Gain | Loss |
| Chr14_CNVR_5  | Chr14 | 53549942 | 53558763 | 8822   | 1.157362   | 2.23049  | 0         | Gain | Loss |
| Chr14_CNVR_6  | Chr14 | 54400062 | 54408081 | 8020   | 0.8179983  | 1.76296  | 3.57E-170 | Gain | Loss |
| Chr14_CNVR_7  | Chr14 | 62711188 | 62720009 | 8822   | 0.9366753  | 1.91411  | 5.29E-237 | Gain | Loss |
| Chr14_CNVR_8  | Chr14 | 62810636 | 62819457 | 8822   | 1.167247   | 2.24583  | 0         | Gain | Loss |
| Chr14_CNVR_9  | Chr14 | 67336322 | 67344341 | 8020   | 0.9538126  | 1.93698  | 1.86E-222 | Gain | Loss |
| Chr14_CNVR_47 | Chr14 | 68126292 | 68135113 | 8822   | -0.8651637 | 0.548984 | 1.12E-189 | Loss | Gain |
| Chr15_CNVR_1  | Chr15 | 11375333 | 11391297 | 15965  | 1.17994    | 2.26567  | 0         | Gain | Loss |
| Chr15_CNVR_25 | Chr15 | 20051967 | 20060835 | 8869   | -3.213262  | 0.107823 | 0         | Loss | Gain |
| Chr15_CNVR_26 | Chr15 | 25560237 | 25577089 | 16853  | -2.740377  | 0.149646 | 0         | Loss | Gain |
| Chr15_CNVR_27 | Chr15 | 30755395 | 30765151 | 9757   | -0.7839502 | 0.580774 | 2.57E-160 | Loss | Gain |
| Chr15_CNVR_28 | Chr15 | 45721747 | 45731503 | 9757   | -2.060392  | 0.239751 | 0         | Loss | Gain |
| Chr15_CNVR_29 | Chr15 | 46607859 | 46619389 | 11531  | -1.052392  | 0.482168 | 0         | Loss | Gain |
| Chr15_CNVR_2  | Chr15 | 46827835 | 46838479 | 10645  | 1.09116    | 2.13045  | 0         | Gain | Loss |
| Chr15_CNVR_3  | Chr15 | 46894361 | 46908551 | 14191  | 1.096268   | 2.13801  | 0         | Gain | Loss |
| Chr15_CNVR_4  | Chr15 | 48453707 | 48465237 | 11531  | 1.099659   | 2.14304  | 0         | Gain | Loss |

|               |       |          |          |       |            |           |           |      |      |
|---------------|-------|----------|----------|-------|------------|-----------|-----------|------|------|
| Chr15_CNVR_5  | Chr15 | 49090573 | 49103877 | 13305 | 1.082488   | 2.11768   | 0         | Gain | Loss |
| Chr15_CNVR_6  | Chr15 | 49111861 | 49124277 | 12417 | 0.9603916  | 1.94584   | 0         | Gain | Loss |
| Chr15_CNVR_30 | Chr15 | 50719105 | 50754583 | 35479 | -4.214915  | 0.0538498 | 0         | Loss | Gain |
| Chr15_CNVR_31 | Chr15 | 50788291 | 50807803 | 19513 | -2.047198  | 0.241954  | 0         | Loss | Gain |
| Chr15_CNVR_7  | Chr15 | 50811353 | 50830865 | 19513 | 1.066226   | 2.09395   | 0         | Gain | Loss |
| Chr15_CNVR_32 | Chr15 | 50831753 | 50844171 | 12419 | -2.689361  | 0.155032  | 0         | Loss | Gain |
| Chr15_CNVR_33 | Chr15 | 52215473 | 52227003 | 11531 | -1.348755  | 0.392631  | 0         | Loss | Gain |
| Chr15_CNVR_34 | Chr15 | 52229665 | 52248291 | 18627 | -1.125354  | 0.45839   | 0         | Loss | Gain |
| Chr15_CNVR_35 | Chr15 | 52264259 | 52282885 | 18627 | -1.881592  | 0.271384  | 0         | Loss | Gain |
| Chr15_CNVR_36 | Chr15 | 53044819 | 53053687 | 8869  | -0.8223231 | 0.565531  | 2.00E-158 | Loss | Gain |
| Chr15_CNVR_37 | Chr15 | 57214605 | 57225249 | 10645 | -2.117252  | 0.230486  | 0         | Loss | Gain |
| Chr15_CNVR_8  | Chr15 | 64543887 | 64566061 | 22175 | 1.302878   | 2.46721   | 0         | Gain | Loss |
| Chr15_CNVR_38 | Chr15 | 77189845 | 77199601 | 9757  | -0.8326443 | 0.561499  | 8.17E-178 | Loss | Gain |
| Chr15_CNVR_39 | Chr15 | 78331415 | 78343831 | 12417 | -2.86361   | 0.137394  | 0         | Loss | Gain |
| Chr15_CNVR_9  | Chr15 | 79531525 | 79543055 | 11531 | 3.111605   | 8.64344   | 0         | Gain | Loss |
| Chr15_CNVR_10 | Chr15 | 79606033 | 79617563 | 11531 | 1.220987   | 2.33106   | 0         | Gain | Loss |
| Chr15_CNVR_11 | Chr15 | 79816253 | 79833105 | 16853 | 1.209821   | 2.31309   | 0         | Gain | Loss |
| Chr15_CNVR_12 | Chr15 | 80490373 | 80508111 | 17739 | 0.8671335  | 1.82404   | 0         | Gain | Loss |
| Chr15_CNVR_13 | Chr15 | 80508999 | 80548913 | 39915 | 0.9321423  | 1.90811   | 0         | Gain | Loss |
| Chr15_CNVR_14 | Chr15 | 80569315 | 80588829 | 19515 | 0.9083332  | 1.87688   | 0         | Gain | Loss |
| Chr15_CNVR_15 | Chr15 | 80592377 | 80617213 | 24837 | 0.9313404  | 1.90705   | 0         | Gain | Loss |
| Chr15_CNVR_16 | Chr15 | 80656241 | 80675755 | 19515 | 0.8900025  | 1.85318   | 0         | Gain | Loss |
| Chr15_CNVR_17 | Chr15 | 80679303 | 80702365 | 23063 | 0.9106429  | 1.87988   | 0         | Gain | Loss |
| Chr15_CNVR_18 | Chr15 | 80709461 | 80736957 | 27497 | 0.8534458  | 1.80681   | 0         | Gain | Loss |
| Chr15_CNVR_19 | Chr15 | 80752037 | 80761793 | 9757  | 0.8437802  | 1.79475   | 3.51E-195 | Gain | Loss |
| Chr15_CNVR_20 | Chr15 | 80767117 | 80775985 | 8869  | 0.8167966  | 1.76149   | 9.98E-168 | Gain | Loss |
| Chr15_CNVR_21 | Chr15 | 80807031 | 80842511 | 35481 | 1.371266   | 2.58697   | 0         | Gain | Loss |
| Chr15_CNVR_22 | Chr15 | 81004833 | 81028781 | 23949 | 1.224192   | 2.33625   | 0         | Gain | Loss |
| Chr15_CNVR_23 | Chr15 | 81029669 | 81086435 | 56767 | 1.117565   | 2.1698    | 0         | Gain | Loss |
| Chr15_CNVR_24 | Chr15 | 81300203 | 81309073 | 8871  | 1.144421   | 2.21057   | 6.76E-297 | Gain | Loss |
| Chr15_CNVR_40 | Chr15 | 81743703 | 81752573 | 8871  | -0.8407358 | 0.558359  | 1.59E-164 | Loss | Gain |
| Chr15_CNVR_41 | Chr15 | 81812003 | 81821759 | 9757  | -0.9167624 | 0.529696  | 3.78E-209 | Loss | Gain |
| Chr15_CNVR_42 | Chr15 | 81822647 | 81840385 | 17739 | -0.8495151 | 0.554971  | 0         | Loss | Gain |
| Chr15_CNVR_43 | Chr15 | 81869657 | 81929973 | 60317 | -2.375839  | 0.192664  | 0         | Loss | Gain |
| Chr15_CNVR_44 | Chr15 | 82086973 | 82096729 | 9757  | -0.8649248 | 0.549075  | 1.10E-189 | Loss | Gain |
| Chr15_CNVR_45 | Chr15 | 83368687 | 83378443 | 9757  | -2.492004  | 0.177759  | 0         | Loss | Gain |
| Chr16_CNVR_9  | Chr16 | 93615    | 103283   | 9669  | -0.7717087 | 0.585723  | 5.87E-156 | Loss | Gain |
| Chr16_CNVR_1  | Chr16 | 2107403  | 2122345  | 14943 | 1.001558   | 2.00216   | 0         | Gain | Loss |
| Chr16_CNVR_2  | Chr16 | 6028623  | 6037411  | 8789  | 0.8448272  | 1.79605   | 1.21E-180 | Gain | Loss |
| Chr16_CNVR_3  | Chr16 | 6084879  | 6093667  | 8789  | 0.9654443  | 1.95266   | 9.67E-228 | Gain | Loss |
| Chr16_CNVR_4  | Chr16 | 6100701  | 6110369  | 9669  | 0.9082018  | 1.8767    | 2.63E-225 | Gain | Loss |
| Chr16_CNVR_5  | Chr16 | 7408653  | 7419199  | 10547 | 0.9412061  | 1.92013   | 3.16E-261 | Gain | Loss |
| Chr16_CNVR_6  | Chr16 | 11524131 | 11533799 | 9669  | 3.207578   | 9.23798   | 0         | Gain | Loss |
| Chr16_CNVR_7  | Chr16 | 24811095 | 24820763 | 9669  | 0.8651249  | 1.8215    | 5.62E-207 | Gain | Loss |
| Chr16_CNVR_8  | Chr16 | 39449081 | 39477209 | 28129 | 2.853403   | 7.22703   | 0         | Gain | Loss |
| Chr16_CNVR_10 | Chr16 | 49636691 | 49645481 | 8791  | -0.8893582 | 0.539854  | 1.01E-180 | Loss | Gain |
| Chr16_CNVR_11 | Chr16 | 49659545 | 49676245 | 16701 | -0.8799694 | 0.543379  | 0         | Loss | Gain |
| Chr16_CNVR_12 | Chr16 | 50673911 | 50685337 | 11427 | -0.8493351 | 0.55504   | 8.23E-217 | Loss | Gain |
| Chr16_CNVR_13 | Chr16 | 50694129 | 50707313 | 13185 | -0.8772992 | 0.544386  | 6.62E-264 | Loss | Gain |
| Chr16_CNVR_14 | Chr16 | 51117807 | 51126595 | 8789  | -0.8280997 | 0.563271  | 3.19E-160 | Loss | Gain |
| Chr16_CNVR_15 | Chr16 | 51147693 | 51156481 | 8789  | -0.9202573 | 0.528415  | 2.75E-191 | Loss | Gain |
| Chr16_CNVR_16 | Chr16 | 51614441 | 51624989 | 10549 | -0.8362895 | 0.560082  | 4.24E-195 | Loss | Gain |
| Chr16_CNVR_17 | Chr16 | 51668939 | 51680365 | 11427 | -0.8893424 | 0.53986   | 2.65E-234 | Loss | Gain |
| Chr16_CNVR_18 | Chr16 | 70880363 | 70889153 | 8791  | -0.8490524 | 0.555149  | 3.66E-167 | Loss | Gain |
| Chr16_CNVR_19 | Chr16 | 70958595 | 70977053 | 18459 | -0.8310411 | 0.562123  | 0         | Loss | Gain |
| Chr16_CNVR_20 | Chr16 | 77057975 | 77067643 | 9669  | -0.8173116 | 0.567498  | 3.81E-172 | Loss | Gain |

|               |       |          |          |       |            |          |           |      |      |
|---------------|-------|----------|----------|-------|------------|----------|-----------|------|------|
| Chr16_CNVR_21 | Chr16 | 81673605 | 81683273 | 9669  | -0.8703478 | 0.547015 | 1.62E-191 | Loss | Gain |
| Chr17_CNVR_1  | Chr17 | 2165911  | 2175370  | 9460  | 0.8848413  | 1.84656  | 5.70E-214 | Gain | Loss |
| Chr17_CNVR_2  | Chr17 | 2231271  | 2264810  | 33540 | 0.9125037  | 1.88231  | 0         | Gain | Loss |
| Chr17_CNVR_10 | Chr17 | 14334911 | 14343510 | 8600  | -0.8712072 | 0.546689 | 1.23E-174 | Loss | Gain |
| Chr17_CNVR_3  | Chr17 | 15323051 | 15332510 | 9460  | 2.673055   | 6.37778  | 0         | Gain | Loss |
| Chr17_CNVR_4  | Chr17 | 21082471 | 21097090 | 14620 | 4.011781   | 16.1312  | 0         | Gain | Loss |
| Chr17_CNVR_11 | Chr17 | 25029011 | 25045350 | 16340 | -1.07575   | 0.474424 | 0         | Loss | Gain |
| Chr17_CNVR_5  | Chr17 | 31413651 | 31424830 | 11180 | 0.89044    | 1.85374  | 2.77E-255 | Gain | Loss |
| Chr17_CNVR_12 | Chr17 | 45696531 | 45705130 | 8600  | -0.8358296 | 0.560261 | 8.26E-163 | Loss | Gain |
| Chr17_CNVR_13 | Chr17 | 45731791 | 45740390 | 8600  | -0.7606846 | 0.590216 | 1.80E-138 | Loss | Gain |
| Chr17_CNVR_14 | Chr17 | 51377691 | 51396610 | 18920 | -0.9496724 | 0.51775  | 0         | Loss | Gain |
| Chr17_CNVR_6  | Chr17 | 52439791 | 52450110 | 10320 | 6.850475   | 115.398  | 0         | Gain | Loss |
| Chr17_CNVR_7  | Chr17 | 52469031 | 52481070 | 12040 | 2.634575   | 6.20992  | 0         | Gain | Loss |
| Chr17_CNVR_15 | Chr17 | 53594771 | 53605950 | 11180 | -0.8322395 | 0.561657 | 1.73E-209 | Loss | Gain |
| Chr17_CNVR_16 | Chr17 | 53695391 | 53705710 | 10320 | -0.8494442 | 0.554999 | 2.17E-200 | Loss | Gain |
| Chr17_CNVR_17 | Chr17 | 62944691 | 62957590 | 12900 | -0.8262365 | 0.563999 | 2.02E-238 | Loss | Gain |
| Chr17_CNVR_18 | Chr17 | 65865251 | 65873850 | 8600  | -0.8779412 | 0.544143 | 6.50E-177 | Loss | Gain |
| Chr17_CNVR_19 | Chr17 | 69289771 | 69298370 | 8600  | -0.7869045 | 0.579586 | 7.84E-147 | Loss | Gain |
| Chr17_CNVR_8  | Chr17 | 70099031 | 70120530 | 21500 | 1.745755   | 3.3537   | 0         | Gain | Loss |
| Chr17_CNVR_20 | Chr17 | 71476751 | 71485350 | 8600  | -0.8527462 | 0.55373  | 1.94E-168 | Loss | Gain |
| Chr17_CNVR_21 | Chr17 | 71586831 | 71596290 | 9460  | -0.8705558 | 0.546936 | 1.18E-191 | Loss | Gain |
| Chr17_CNVR_9  | Chr17 | 72846731 | 72863070 | 16340 | 1.446532   | 2.72552  | 0         | Gain | Loss |
| Chr17_CNVR_22 | Chr17 | 73148591 | 73157190 | 8600  | -1.387247  | 0.382294 | 0         | Loss | Gain |
| Chr17_CNVR_23 | Chr17 | 73183851 | 73195030 | 11180 | -0.870606  | 0.546917 | 3.86E-226 | Loss | Gain |
| Chr17_CNVR_24 | Chr17 | 73249211 | 73257810 | 8600  | -0.9023558 | 0.535012 | 3.19E-185 | Loss | Gain |
| Chr17_CNVR_25 | Chr17 | 73415191 | 73423790 | 8600  | -0.9121558 | 0.53139  | 1.39E-188 | Loss | Gain |
| Chr17_CNVR_26 | Chr17 | 73471091 | 73479690 | 8600  | -0.9223385 | 0.527653 | 4.34E-192 | Loss | Gain |
| Chr17_CNVR_27 | Chr17 | 73515811 | 73524410 | 8600  | -0.86435   | 0.549294 | 2.50E-172 | Loss | Gain |
| Chr17_CNVR_28 | Chr17 | 73681791 | 73690390 | 8600  | -0.9294537 | 0.525057 | 1.51E-194 | Loss | Gain |
| Chr17_CNVR_29 | Chr17 | 73702431 | 73718770 | 16340 | -0.8848006 | 0.541562 | 0         | Loss | Gain |
| Chr17_CNVR_30 | Chr17 | 73760051 | 73769510 | 9460  | -1.085709  | 0.471161 | 1.03E-274 | Loss | Gain |
| Chr17_CNVR_31 | Chr17 | 73791011 | 73815090 | 24080 | -0.9638337 | 0.512693 | 0         | Loss | Gain |
| Chr17_CNVR_32 | Chr17 | 73972471 | 73981930 | 9460  | -0.8877686 | 0.540449 | 4.60E-198 | Loss | Gain |
| Chr17_CNVR_33 | Chr17 | 74087711 | 74097170 | 9460  | -0.9166724 | 0.529729 | 6.09E-209 | Loss | Gain |
| Chr17_CNVR_34 | Chr17 | 74139311 | 74147910 | 8600  | -0.9078661 | 0.532973 | 4.13E-187 | Loss | Gain |
| Chr17_CNVR_35 | Chr17 | 74158231 | 74170270 | 12040 | -0.949976  | 0.517641 | 1.70E-281 | Loss | Gain |
| Chr17_CNVR_36 | Chr17 | 74189191 | 74200370 | 11180 | -0.9167648 | 0.529696 | 1.38E-246 | Loss | Gain |
| Chr17_CNVR_37 | Chr17 | 74244231 | 74252830 | 8600  | -0.8425686 | 0.55765  | 4.80E-165 | Loss | Gain |
| Chr17_CNVR_38 | Chr17 | 74290671 | 74306150 | 15480 | -0.9407226 | 0.520972 | 0         | Loss | Gain |
| Chr17_CNVR_39 | Chr17 | 74342271 | 74353450 | 11180 | -0.9523882 | 0.516776 | 1.23E-262 | Loss | Gain |
| Chr17_CNVR_40 | Chr17 | 74453211 | 74461810 | 8600  | -0.9499516 | 0.51765  | 1.15E-201 | Loss | Gain |
| Chr17_CNVR_41 | Chr17 | 74464391 | 74475570 | 11180 | -0.9611002 | 0.513665 | 1.36E-266 | Loss | Gain |
| Chr17_CNVR_42 | Chr17 | 74487611 | 74501370 | 13760 | -0.828529  | 0.563103 | 2.21E-255 | Loss | Gain |
| Chr17_CNVR_43 | Chr17 | 74534911 | 74548670 | 13760 | -0.9582142 | 0.514694 | 0         | Loss | Gain |
| Chr17_CNVR_44 | Chr17 | 74639831 | 74648430 | 8600  | -0.9387343 | 0.52169  | 9.16E-198 | Loss | Gain |
| Chr17_CNVR_45 | Chr17 | 74673371 | 74684550 | 11180 | -0.8653011 | 0.548932 | 8.10E-224 | Loss | Gain |
| Chr17_CNVR_46 | Chr17 | 74710351 | 74720670 | 10320 | -0.8847703 | 0.541574 | 1.17E-214 | Loss | Gain |
| Chr17_CNVR_47 | Chr17 | 74756791 | 74780010 | 23220 | -0.9242739 | 0.526946 | 0         | Loss | Gain |
| Chr17_CNVR_48 | Chr17 | 74788611 | 74803230 | 14620 | -0.9534065 | 0.516412 | 0         | Loss | Gain |
| Chr17_CNVR_49 | Chr17 | 74839351 | 74851390 | 12040 | -0.8429795 | 0.557491 | 2.01E-230 | Loss | Gain |
| Chr17_CNVR_50 | Chr17 | 74914171 | 74930510 | 16340 | -0.9321421 | 0.52408  | 0         | Loss | Gain |
| Chr17_CNVR_51 | Chr17 | 74976091 | 74988990 | 12900 | -1.182641  | 0.440544 | 0         | Loss | Gain |
| Chr17_CNVR_52 | Chr17 | 74990711 | 75002750 | 12040 | -0.9083504 | 0.532794 | 2.41E-261 | Loss | Gain |
| Chr17_CNVR_53 | Chr17 | 75070691 | 75082730 | 12040 | -0.9064922 | 0.533481 | 1.88E-260 | Loss | Gain |
| Chr19_CNVR_1  | Chr19 | 1206037  | 1216332  | 10296 | 1.724517   | 3.30469  | 0         | Gain | Loss |
| Chr19_CNVR_2  | Chr19 | 1866853  | 1877148  | 10296 | 1.291848   | 2.44841  | 0         | Gain | Loss |

|               |       |           |           |       |            |          |           |      |      |
|---------------|-------|-----------|-----------|-------|------------|----------|-----------|------|------|
| Chr19_CNVR_3  | Chr19 | 2885221   | 2896452   | 11232 | 0.9048387  | 1.87234  | 3.40E-261 | Gain | Loss |
| Chr19_CNVR_4  | Chr19 | 3422485   | 3439332   | 16848 | 1.546705   | 2.92149  | 0         | Gain | Loss |
| Chr19_CNVR_5  | Chr19 | 19073341  | 19085508  | 12168 | 1.092436   | 2.13234  | 0         | Gain | Loss |
| Chr19_CNVR_6  | Chr19 | 19122949  | 19132308  | 9360  | 0.859324   | 1.81419  | 7.13E-199 | Gain | Loss |
| Chr19_CNVR_7  | Chr19 | 19795933  | 19826820  | 30888 | 1.348395   | 2.54629  | 0         | Gain | Loss |
| Chr19_CNVR_8  | Chr19 | 19827757  | 19851156  | 23400 | 1.769425   | 3.40918  | 0         | Gain | Loss |
| Chr19_CNVR_9  | Chr19 | 19866133  | 19897956  | 31824 | 1.952064   | 3.86928  | 0         | Gain | Loss |
| Chr19_CNVR_10 | Chr19 | 19902637  | 19934460  | 31824 | 1.196291   | 2.2915   | 0         | Gain | Loss |
| Chr19_CNVR_11 | Chr19 | 19935397  | 19952244  | 16848 | 1.479361   | 2.78825  | 0         | Gain | Loss |
| Chr19_CNVR_12 | Chr19 | 38842597  | 38854764  | 12168 | 0.8947963  | 1.85935  | 3.12E-277 | Gain | Loss |
| Chr19_CNVR_15 | Chr19 | 43915717  | 43927884  | 12168 | -1.306466  | 0.40431  | 0         | Loss | Gain |
| Chr19_CNVR_13 | Chr19 | 47246005  | 47255364  | 9360  | 0.9050257  | 1.87258  | 4.26E-218 | Gain | Loss |
| Chr19_CNVR_16 | Chr19 | 48867157  | 48877452  | 10296 | -1.089147  | 0.470039 | 9.69E-273 | Loss | Gain |
| Chr19_CNVR_14 | Chr19 | 52132861  | 52145964  | 13104 | 1.791579   | 3.46194  | 0         | Gain | Loss |
| Chr19_CNVR_17 | Chr19 | 64048141  | 64058436  | 10296 | -1.42695   | 0.371916 | 0         | Loss | Gain |
| Chr2_CNVR_7   | Chr2  | 55923     | 65459     | 9537  | -0.8933301 | 0.53837  | 9.02E-201 | Loss | Gain |
| Chr2_CNVR_8   | Chr2  | 85401     | 115745    | 30345 | -1.071068  | 0.475967 | 0         | Loss | Gain |
| Chr2_CNVR_9   | Chr2  | 128751    | 142621    | 13871 | -1.262464  | 0.416831 | 0         | Loss | Gain |
| Chr2_CNVR_10  | Chr2  | 54595425  | 54610163  | 14739 | -0.875724  | 0.54498  | 7.50E-299 | Loss | Gain |
| Chr2_CNVR_11  | Chr2  | 54612765  | 54629237  | 16473 | -1.184065  | 0.44011  | 0         | Loss | Gain |
| Chr2_CNVR_1   | Chr2  | 56706569  | 56716973  | 10405 | 0.9366652  | 1.9141   | 1.11E-248 | Gain | Loss |
| Chr2_CNVR_2   | Chr2  | 57407973  | 57416641  | 8669  | 1.260106   | 2.39513  | 0         | Gain | Loss |
| Chr2_CNVR_3   | Chr2  | 68405001  | 68417137  | 12137 | 3.246733   | 9.49214  | 0         | Gain | Loss |
| Chr2_CNVR_4   | Chr2  | 68451819  | 68460487  | 8669  | 2.60889    | 6.10034  | 0         | Gain | Loss |
| Chr2_CNVR_12  | Chr2  | 79761833  | 79771369  | 9537  | -2.2105    | 0.216059 | 0         | Loss | Gain |
| Chr2_CNVR_13  | Chr2  | 104934311 | 104952517 | 18207 | -0.837435  | 0.559638 | 0         | Loss | Gain |
| Chr2_CNVR_14  | Chr2  | 106679583 | 106689119 | 9537  | -0.8259656 | 0.564105 | 1.15E-175 | Loss | Gain |
| Chr2_CNVR_15  | Chr2  | 106706459 | 106715995 | 9537  | -0.8381107 | 0.559376 | 4.01E-180 | Loss | Gain |
| Chr2_CNVR_16  | Chr2  | 106735937 | 106756745 | 20809 | -0.9110572 | 0.531795 | 0         | Loss | Gain |
| Chr2_CNVR_17  | Chr2  | 108097127 | 108117067 | 19941 | -0.8537731 | 0.553336 | 0         | Loss | Gain |
| Chr2_CNVR_18  | Chr2  | 108123137 | 108135275 | 12139 | -0.919289  | 0.52877  | 1.51E-267 | Loss | Gain |
| Chr2_CNVR_19  | Chr2  | 108148281 | 108157817 | 9537  | -0.8630722 | 0.549781 | 2.20E-189 | Loss | Gain |
| Chr2_CNVR_20  | Chr2  | 120178773 | 120196111 | 17339 | -0.8556552 | 0.552614 | 0         | Loss | Gain |
| Chr2_CNVR_21  | Chr2  | 120900983 | 120910519 | 9537  | -0.8208416 | 0.566112 | 8.60E-174 | Loss | Gain |
| Chr2_CNVR_22  | Chr2  | 120974679 | 120988549 | 13871 | -0.9013505 | 0.535385 | 1.71E-295 | Loss | Gain |
| Chr2_CNVR_23  | Chr2  | 122527475 | 122543947 | 16473 | -0.9077838 | 0.533003 | 0         | Loss | Gain |
| Chr2_CNVR_24  | Chr2  | 122544815 | 122555219 | 10405 | -0.8190931 | 0.566798 | 1.04E-188 | Loss | Gain |
| Chr2_CNVR_25  | Chr2  | 122565623 | 122575159 | 9537  | -0.8109083 | 0.570023 | 3.52E-170 | Loss | Gain |
| Chr2_CNVR_26  | Chr2  | 122609841 | 122618509 | 8669  | -0.7883701 | 0.578998 | 1.61E-147 | Loss | Gain |
| Chr2_CNVR_5   | Chr2  | 124338639 | 124347307 | 8669  | 0.8277556  | 1.77492  | 1.18E-167 | Gain | Loss |
| Chr2_CNVR_27  | Chr2  | 126327537 | 126336205 | 8669  | -0.7710511 | 0.58599  | 6.32E-142 | Loss | Gain |
| Chr2_CNVR_28  | Chr2  | 126535617 | 126544285 | 8669  | -0.7544253 | 0.592782 | 1.28E-136 | Loss | Gain |
| Chr2_CNVR_29  | Chr2  | 128566131 | 128576533 | 10403 | -0.79696   | 0.575561 | 5.68E-180 | Loss | Gain |
| Chr2_CNVR_30  | Chr2  | 129888305 | 129896975 | 8671  | -0.8662388 | 0.548575 | 1.97E-173 | Loss | Gain |
| Chr2_CNVR_31  | Chr2  | 130518615 | 130527283 | 8669  | -0.8551744 | 0.552798 | 1.12E-169 | Loss | Gain |
| Chr2_CNVR_32  | Chr2  | 130542023 | 130553293 | 11271 | -0.8833723 | 0.542099 | 1.93E-232 | Loss | Gain |
| Chr2_CNVR_33  | Chr2  | 130568033 | 130578437 | 10405 | -0.8112693 | 0.56988  | 1.32E-185 | Loss | Gain |
| Chr2_CNVR_34  | Chr2  | 130606181 | 130617451 | 11271 | -0.9174209 | 0.529455 | 9.63E-248 | Loss | Gain |
| Chr2_CNVR_35  | Chr2  | 130636527 | 130652999 | 16473 | -0.8917588 | 0.538957 | 0         | Loss | Gain |
| Chr2_CNVR_36  | Chr2  | 130653867 | 130665137 | 11271 | -0.7880139 | 0.579141 | 5.21E-191 | Loss | Gain |
| Chr2_CNVR_37  | Chr2  | 130694615 | 130703285 | 8671  | -0.8356035 | 0.560349 | 4.27E-163 | Loss | Gain |
| Chr2_CNVR_38  | Chr2  | 130770045 | 130779581 | 9537  | -0.7745495 | 0.584571 | 3.75E-157 | Loss | Gain |
| Chr2_CNVR_39  | Chr2  | 130788251 | 130797787 | 9537  | -0.8462058 | 0.556246 | 4.11E-183 | Loss | Gain |
| Chr2_CNVR_40  | Chr2  | 130851543 | 130863679 | 12137 | -0.892429  | 0.538706 | 1.62E-254 | Loss | Gain |
| Chr2_CNVR_41  | Chr2  | 130864547 | 130874083 | 9537  | -0.916761  | 0.529697 | 1.06E-209 | Loss | Gain |
| Chr2_CNVR_42  | Chr2  | 131490521 | 131500925 | 10405 | -0.8392866 | 0.55892  | 8.79E-197 | Loss | Gain |



|              |      |           |           |       |            |          |           |      |      |
|--------------|------|-----------|-----------|-------|------------|----------|-----------|------|------|
| Chr2_CNVR_43 | Chr2 | 131503527 | 131514797 | 11271 | -0.8805384 | 0.543165 | 3.53E-231 | Loss | Gain |
| Chr2_CNVR_44 | Chr2 | 131736749 | 131753221 | 16473 | -0.9579575 | 0.514785 | 0         | Loss | Gain |
| Chr2_CNVR_45 | Chr2 | 131779233 | 131791369 | 12137 | -0.9158116 | 0.530046 | 7.52E-266 | Loss | Gain |
| Chr2_CNVR_46 | Chr2 | 131948297 | 131958701 | 10405 | -0.8332576 | 0.56126  | 2.32E-194 | Loss | Gain |
| Chr2_CNVR_47 | Chr2 | 133284345 | 133296481 | 12137 | -1.240442  | 0.423243 | 0         | Loss | Gain |
| Chr2_CNVR_48 | Chr2 | 133536641 | 133545311 | 8671  | -0.7969337 | 0.575571 | 2.62E-150 | Loss | Gain |
| Chr2_CNVR_49 | Chr2 | 133580859 | 133590395 | 9537  | -0.8431353 | 0.557431 | 5.61E-182 | Loss | Gain |
| Chr2_CNVR_50 | Chr2 | 133801077 | 133809745 | 8669  | -0.8696501 | 0.54728  | 1.36E-174 | Loss | Gain |
| Chr2_CNVR_51 | Chr2 | 133849629 | 133868701 | 19073 | -0.8756046 | 0.545025 | 0         | Loss | Gain |
| Chr2_CNVR_52 | Chr2 | 133873037 | 133886041 | 13005 | -0.9680881 | 0.511183 | 0         | Loss | Gain |
| Chr2_CNVR_53 | Chr2 | 133903383 | 133918987 | 15605 | -0.8678098 | 0.547978 | 0         | Loss | Gain |
| Chr2_CNVR_54 | Chr2 | 133941531 | 133950199 | 8669  | -0.8886528 | 0.540118 | 4.25E-181 | Loss | Gain |
| Chr2_CNVR_55 | Chr2 | 133956269 | 133971875 | 15607 | -0.7705231 | 0.586205 | 1.67E-253 | Loss | Gain |
| Chr2_CNVR_56 | Chr2 | 134189493 | 134200763 | 11271 | -0.9124414 | 0.531285 | 1.72E-245 | Loss | Gain |
| Chr2_CNVR_57 | Chr2 | 134273591 | 134282261 | 8671  | -0.8504962 | 0.554594 | 4.24E-168 | Loss | Gain |
| Chr2_CNVR_58 | Chr2 | 134301335 | 134311739 | 10405 | -0.9111351 | 0.531767 | 3.17E-226 | Loss | Gain |
| Chr2_CNVR_59 | Chr2 | 134336015 | 134345551 | 9537  | -0.829056  | 0.562897 | 8.53E-177 | Loss | Gain |
| Chr2_CNVR_60 | Chr2 | 134433987 | 134445257 | 11271 | -0.8696078 | 0.547296 | 2.52E-226 | Loss | Gain |
| Chr2_CNVR_61 | Chr2 | 134480805 | 134490341 | 9537  | -0.7941145 | 0.576697 | 4.00E-164 | Loss | Gain |
| Chr2_CNVR_62 | Chr2 | 134506815 | 134517217 | 10403 | -0.8450281 | 0.5567   | 4.28E-199 | Loss | Gain |
| Chr2_CNVR_63 | Chr2 | 134538893 | 134547563 | 8671  | -0.8894114 | 0.539834 | 2.33E-181 | Loss | Gain |
| Chr2_CNVR_64 | Chr2 | 134548431 | 134558833 | 10403 | -0.9339199 | 0.523434 | 9.06E-236 | Loss | Gain |
| Chr2_CNVR_65 | Chr2 | 134567505 | 134595247 | 27743 | -0.9246788 | 0.526798 | 0         | Loss | Gain |
| Chr2_CNVR_66 | Chr2 | 134613455 | 134622125 | 8671  | -1.027262  | 0.49064  | 4.16E-230 | Loss | Gain |
| Chr2_CNVR_67 | Chr2 | 134635131 | 134645533 | 10403 | -0.8479591 | 0.55557  | 2.80E-200 | Loss | Gain |
| Chr2_CNVR_68 | Chr2 | 134667209 | 134682815 | 15607 | -0.854452  | 0.553075 | 2.70E-303 | Loss | Gain |
| Chr2_CNVR_69 | Chr2 | 134823269 | 134832805 | 9537  | -0.816918  | 0.567653 | 2.31E-172 | Loss | Gain |
| Chr2_CNVR_70 | Chr2 | 134876157 | 134893495 | 17339 | -0.8392846 | 0.558921 | 0         | Loss | Gain |
| Chr2_CNVR_71 | Chr2 | 134903901 | 134919505 | 15605 | -0.880537  | 0.543165 | 0         | Loss | Gain |
| Chr2_CNVR_72 | Chr2 | 134956787 | 134965457 | 8671  | -0.8568934 | 0.55214  | 2.93E-170 | Loss | Gain |
| Chr2_CNVR_73 | Chr2 | 134984531 | 134994935 | 10405 | -0.8358133 | 0.560267 | 2.19E-195 | Loss | Gain |
| Chr2_CNVR_74 | Chr2 | 135002739 | 135013141 | 10403 | -0.8648167 | 0.549116 | 4.02E-207 | Loss | Gain |
| Chr2_CNVR_75 | Chr2 | 135036551 | 135046087 | 9537  | -0.8079266 | 0.571202 | 4.23E-169 | Loss | Gain |
| Chr2_CNVR_76 | Chr2 | 135084237 | 135092905 | 8669  | -0.8874884 | 0.540554 | 1.07E-180 | Loss | Gain |
| Chr2_CNVR_77 | Chr2 | 135098109 | 135107645 | 9537  | -0.9121965 | 0.531375 | 5.92E-208 | Loss | Gain |
| Chr2_CNVR_78 | Chr2 | 135127587 | 135137123 | 9537  | -0.8698023 | 0.547222 | 6.68E-192 | Loss | Gain |
| Chr2_CNVR_79 | Chr2 | 135177005 | 135190009 | 13005 | -0.8878754 | 0.540409 | 3.42E-270 | Loss | Gain |
| Chr2_CNVR_80 | Chr2 | 135262839 | 135274109 | 11271 | -0.8716893 | 0.546507 | 3.01E-227 | Loss | Gain |
| Chr2_CNVR_81 | Chr2 | 135331331 | 135340001 | 8671  | -0.9170852 | 0.529578 | 6.11E-191 | Loss | Gain |
| Chr2_CNVR_82 | Chr2 | 135389421 | 135404159 | 14739 | -0.8245312 | 0.564666 | 1.60E-269 | Loss | Gain |
| Chr2_CNVR_83 | Chr2 | 135507333 | 135525539 | 18207 | -0.8716393 | 0.546525 | 0         | Loss | Gain |
| Chr2_CNVR_84 | Chr2 | 135532475 | 135548081 | 15607 | -0.9047061 | 0.534142 | 0         | Loss | Gain |
| Chr2_CNVR_85 | Chr2 | 135567155 | 135577559 | 10405 | -0.9621407 | 0.513295 | 1.04E-247 | Loss | Gain |
| Chr2_CNVR_86 | Chr2 | 135578427 | 135596633 | 18207 | -0.9496272 | 0.517766 | 0         | Loss | Gain |
| Chr2_CNVR_87 | Chr2 | 135598367 | 135624377 | 26011 | -0.9860859 | 0.504846 | 0         | Loss | Gain |
| Chr2_CNVR_88 | Chr2 | 135634781 | 135643451 | 8671  | -0.8926503 | 0.538624 | 1.79E-182 | Loss | Gain |
| Chr2_CNVR_89 | Chr2 | 135654723 | 135665993 | 11271 | -0.9952762 | 0.50164  | 1.58E-283 | Loss | Gain |
| Chr2_CNVR_90 | Chr2 | 135681599 | 135690269 | 8671  | -0.9520011 | 0.516915 | 3.44E-203 | Loss | Gain |
| Chr2_CNVR_91 | Chr2 | 135692003 | 135706741 | 14739 | -0.9079903 | 0.532927 | 0         | Loss | Gain |
| Chr2_CNVR_92 | Chr2 | 135708477 | 135717145 | 8669  | -0.9407942 | 0.520946 | 3.07E-199 | Loss | Gain |
| Chr2_CNVR_93 | Chr2 | 135721481 | 135741421 | 19941 | -0.9553415 | 0.515719 | 0         | Loss | Gain |
| Chr2_CNVR_94 | Chr2 | 135742289 | 135764831 | 22543 | -0.8942581 | 0.538024 | 0         | Loss | Gain |
| Chr2_CNVR_95 | Chr2 | 135786507 | 135802111 | 15605 | -0.9653714 | 0.512147 | 0         | Loss | Gain |
| Chr2_CNVR_96 | Chr2 | 135809049 | 135821185 | 12137 | -0.8615907 | 0.550345 | 9.32E-240 | Loss | Gain |
| Chr2_CNVR_97 | Chr2 | 135822921 | 135831589 | 8669  | -0.8658554 | 0.548721 | 2.67E-173 | Loss | Gain |
| Chr2_CNVR_98 | Chr2 | 135841127 | 135849797 | 8671  | -0.8235856 | 0.565036 | 4.33E-159 | Loss | Gain |

|               |       |           |           |       |            |            |           |      |      |
|---------------|-------|-----------|-----------|-------|------------|------------|-----------|------|------|
| Chr2_CNVR_99  | Chr2  | 135885345 | 135894013 | 8669  | -0.837275  | 0.5597     | 1.18E-163 | Loss | Gain |
| Chr2_CNVR_100 | Chr2  | 135904419 | 135915689 | 11271 | -0.899179  | 0.536192   | 1.63E-239 | Loss | Gain |
| Chr2_CNVR_101 | Chr2  | 136073483 | 136087355 | 13873 | -0.8328441 | 0.561421   | 3.18E-258 | Loss | Gain |
| Chr2_CNVR_102 | Chr2  | 136098627 | 136108163 | 9537  | -0.7917809 | 0.577631   | 2.75E-163 | Loss | Gain |
| Chr2_CNVR_103 | Chr2  | 136115099 | 136125503 | 10405 | -0.8205636 | 0.566221   | 2.71E-189 | Loss | Gain |
| Chr2_CNVR_104 | Chr2  | 136129839 | 136139375 | 9537  | -0.8436811 | 0.55722    | 3.53E-182 | Loss | Gain |
| Chr2_CNVR_105 | Chr2  | 136149779 | 136167985 | 18207 | -0.8850956 | 0.541452   | 0         | Loss | Gain |
| Chr2_CNVR_106 | Chr2  | 136206135 | 136216537 | 10403 | -0.8416053 | 0.558022   | 1.03E-197 | Loss | Gain |
| Chr2_CNVR_107 | Chr2  | 136222607 | 136233877 | 11271 | -0.8813346 | 0.542865   | 1.56E-231 | Loss | Gain |
| Chr2_CNVR_108 | Chr2  | 136234745 | 136243415 | 8671  | -0.8710752 | 0.546739   | 4.45E-175 | Loss | Gain |
| Chr2_CNVR_109 | Chr2  | 136244283 | 136253819 | 9537  | -0.8256639 | 0.564222   | 1.49E-175 | Loss | Gain |
| Chr2_CNVR_110 | Chr2  | 136495713 | 136509583 | 13871 | -0.8728442 | 0.546069   | 7.94E-280 | Loss | Gain |
| Chr2_CNVR_111 | Chr2  | 136529525 | 136541663 | 12139 | -0.9861258 | 0.504832   | 1.38E-300 | Loss | Gain |
| Chr2_CNVR_112 | Chr2  | 136544265 | 136555535 | 11271 | -0.8094659 | 0.570593   | 3.97E-200 | Loss | Gain |
| Chr2_CNVR_113 | Chr2  | 136567673 | 136579811 | 12139 | -0.8302981 | 0.562413   | 5.05E-225 | Loss | Gain |
| Chr2_CNVR_114 | Chr2  | 136608423 | 136622293 | 13871 | -0.8968549 | 0.537056   | 5.22E-293 | Loss | Gain |
| Chr2_CNVR_115 | Chr2  | 136901469 | 136916207 | 14739 | -1.139294  | 0.453982   | 0         | Loss | Gain |
| Chr2_CNVR_116 | Chr2  | 136972563 | 136983833 | 11271 | -2.280148  | 0.205877   | 0         | Loss | Gain |
| Chr2_CNVR_6   | Chr2  | 137002041 | 137015911 | 13871 | 3.314276   | 9.9471     | 0         | Gain | Loss |
| Chr2_CNVR_117 | Chr2  | 137030651 | 137043655 | 13005 | -1.684422  | 0.311128   | 0         | Loss | Gain |
| Chr20_CNVR_1  | Chr20 | 16925635  | 16934394  | 8760  | 0.8717943  | 1.82994    | 1.21E-185 | Gain | Loss |
| Chr20_CNVR_2  | Chr20 | 44576575  | 44587086  | 10512 | 1.10961    | 2.15787    | 0         | Gain | Loss |
| Chr20_CNVR_3  | Chr20 | 45832759  | 45841518  | 8760  | 0.8691576  | 1.8266     | 1.14E-184 | Gain | Loss |
| Chr20_CNVR_4  | Chr20 | 62333095  | 62341854  | 8760  | -0.8417989 | 0.557947   | 4.70E-165 | Loss | Gain |
| Chr20_CNVR_5  | Chr20 | 67241323  | 67252710  | 11388 | -1.052111  | 0.482262   | 0         | Loss | Gain |
| Chr20_CNVR_6  | Chr20 | 70235491  | 70246878  | 11388 | -0.7995439 | 0.574531   | 8.42E-196 | Loss | Gain |
| Chr20_CNVR_7  | Chr20 | 70250383  | 70260018  | 9636  | -0.8427764 | 0.55757    | 1.03E-181 | Loss | Gain |
| Chr20_CNVR_8  | Chr20 | 70577131  | 70592898  | 15768 | -0.8759571 | 0.544892   | 0         | Loss | Gain |
| Chr20_CNVR_9  | Chr20 | 70910887  | 70925778  | 14892 | -0.8801676 | 0.543304   | 3.71E-301 | Loss | Gain |
| Chr20_CNVR_10 | Chr20 | 70949431  | 70964322  | 14892 | -0.9511347 | 0.517225   | 0         | Loss | Gain |
| Chr20_CNVR_11 | Chr20 | 70965199  | 70979214  | 14016 | -0.980629  | 0.506759   | 0         | Loss | Gain |
| Chr20_CNVR_12 | Chr20 | 71036155  | 71044914  | 8760  | -0.8083996 | 0.571015   | 5.48E-154 | Loss | Gain |
| Chr20_CNVR_13 | Chr20 | 71051047  | 71060682  | 9636  | -0.9433651 | 0.520019   | 1.13E-219 | Loss | Gain |
| Chr20_CNVR_14 | Chr20 | 71061559  | 71071194  | 9636  | -0.9259915 | 0.526319   | 5.36E-213 | Loss | Gain |
| Chr20_CNVR_15 | Chr20 | 71085211  | 71105358  | 20148 | -0.882633  | 0.542377   | 0         | Loss | Gain |
| Chr20_CNVR_16 | Chr20 | 71137771  | 71158794  | 21024 | -0.9011631 | 0.535455   | 0         | Loss | Gain |
| Chr20_CNVR_17 | Chr20 | 71180695  | 71197338  | 16644 | -0.8908223 | 0.539307   | 0         | Loss | Gain |
| Chr20_CNVR_18 | Chr20 | 71246395  | 71263038  | 16644 | -0.894564  | 0.53791    | 0         | Loss | Gain |
| Chr20_CNVR_19 | Chr20 | 71292823  | 71303334  | 10512 | -0.9875206 | 0.504344   | 3.58E-258 | Loss | Gain |
| Chr20_CNVR_20 | Chr20 | 71327863  | 71344506  | 16644 | -0.9000765 | 0.535858   | 0         | Loss | Gain |
| Chr20_CNVR_21 | Chr20 | 71361151  | 71378670  | 17520 | -0.9993785 | 0.500215   | 0         | Loss | Gain |
| Chr20_CNVR_22 | Chr20 | 71400571  | 71411958  | 11388 | -0.9159423 | 0.529998   | 8.45E-247 | Loss | Gain |
| Chr20_CNVR_23 | Chr20 | 71419843  | 71441742  | 21900 | -0.9958686 | 0.501434   | 0         | Loss | Gain |
| Chr20_CNVR_24 | Chr20 | 71467147  | 71480286  | 13140 | -0.8120699 | 0.569564   | 9.41E-232 | Loss | Gain |
| Chr20_CNVR_25 | Chr20 | 71495179  | 71503938  | 8760  | -0.8642075 | 0.549348   | 1.35E-172 | Loss | Gain |
| Chr21_CNVR_7  | Chr21 | 951775    | 969295    | 17521 | -1.399186  | 0.379143   | 0         | Loss | Gain |
| Chr21_CNVR_8  | Chr21 | 1771711   | 1780471   | 8761  | -1.429793  | 0.371184   | 0         | Loss | Gain |
| Chr21_CNVR_9  | Chr21 | 9609283   | 9641695   | 32413 | -1.914598  | 0.265246   | 0         | Loss | Gain |
| Chr21_CNVR_10 | Chr21 | 20059087  | 20083615  | 24529 | -1.38825   | 0.382028   | 0         | Loss | Gain |
| Chr21_CNVR_11 | Chr21 | 20087119  | 20109019  | 21901 | -2.799482  | 0.143639   | 0         | Loss | Gain |
| Chr21_CNVR_12 | Chr21 | 20114275  | 20148439  | 34165 | -2.194642  | 0.218447   | 0         | Loss | Gain |
| Chr21_CNVR_1  | Chr21 | 37111303  | 37125319  | 14017 | 1.03735    | 2.05245    | 0         | Gain | Loss |
| Chr21_CNVR_2  | Chr21 | 37127947  | 37141087  | 13141 | 1.014821   | 2.02065    | 0         | Gain | Loss |
| Chr21_CNVR_13 | Chr21 | 37431043  | 37442431  | 11389 | -6.809451  | 0.00891561 | 0         | Loss | Gain |
| Chr21_CNVR_3  | Chr21 | 40147519  | 40157155  | 9637  | 0.9939048  | 1.99157    | 1.40E-266 | Gain | Loss |
| Chr21_CNVR_4  | Chr21 | 41978359  | 41987119  | 8761  | 1.03217    | 2.0451     | 1.69E-258 | Gain | Loss |

|               |       |          |          |       |            |           |           |      |      |
|---------------|-------|----------|----------|-------|------------|-----------|-----------|------|------|
| Chr21_CNVR_5  | Chr21 | 53551195 | 53560831 | 9637  | 0.9225136  | 1.89541   | 1.49E-234 | Gain | Loss |
| Chr21_CNVR_6  | Chr21 | 54928267 | 54938779 | 10513 | 1.198148   | 2.29445   | 0         | Gain | Loss |
| Chr21_CNVR_14 | Chr21 | 62490775 | 62499535 | 8761  | -0.9731018 | 0.50941   | 3.26E-209 | Loss | Gain |
| Chr21_CNVR_15 | Chr21 | 64675519 | 64686031 | 10513 | -1.007876  | 0.497278  | 2.94E-265 | Loss | Gain |
| Chr21_CNVR_16 | Chr21 | 64687783 | 64698295 | 10513 | -1.127332  | 0.457761  | 0         | Loss | Gain |
| Chr21_CNVR_17 | Chr21 | 65933455 | 65942215 | 8761  | -0.9527933 | 0.516631  | 3.74E-202 | Loss | Gain |
| Chr21_CNVR_18 | Chr21 | 70409815 | 70420327 | 10513 | -0.8290479 | 0.562901  | 5.44E-192 | Loss | Gain |
| Chr21_CNVR_19 | Chr21 | 70860955 | 70871467 | 10513 | -0.7912129 | 0.577858  | 2.93E-177 | Loss | Gain |
| Chr21_CNVR_20 | Chr21 | 71129887 | 71139523 | 9637  | -0.8307046 | 0.562255  | 9.22E-177 | Loss | Gain |
| Chr21_CNVR_21 | Chr21 | 71217487 | 71231503 | 14017 | -0.8868519 | 0.540793  | 4.55E-286 | Loss | Gain |
| Chr21_CNVR_22 | Chr21 | 71505691 | 71533723 | 28033 | -0.9655153 | 0.512095  | 0         | Loss | Gain |
| Chr22_CNVR_1  | Chr22 | 50690063 | 50700563 | 10501 | -0.8605807 | 0.550731  | 1.84E-204 | Loss | Gain |
| Chr22_CNVR_2  | Chr22 | 58474939 | 58483687 | 8749  | -0.82218   | 0.565587  | 4.46E-158 | Loss | Gain |
| Chr22_CNVR_3  | Chr22 | 58517813 | 58527437 | 9625  | -0.8593122 | 0.551215  | 3.92E-187 | Loss | Gain |
| Chr22_CNVR_4  | Chr22 | 59469813 | 59479437 | 9625  | -0.8485942 | 0.555326  | 3.18E-183 | Loss | Gain |
| Chr22_CNVR_5  | Chr22 | 60120813 | 60134813 | 14001 | -0.9069695 | 0.533304  | 7.35E-297 | Loss | Gain |
| Chr24_CNVR_4  | Chr24 | 1009034  | 1023892  | 14859 | -0.8739209 | 0.545662  | 8.66E-297 | Loss | Gain |
| Chr24_CNVR_5  | Chr24 | 1065844  | 1075458  | 9615  | -0.8442996 | 0.556981  | 7.15E-182 | Loss | Gain |
| Chr24_CNVR_6  | Chr24 | 19922394 | 19932882 | 10489 | -0.8627619 | 0.549899  | 1.28E-205 | Loss | Gain |
| Chr24_CNVR_7  | Chr24 | 19943370 | 19952984 | 9615  | -0.8850084 | 0.541484  | 6.45E-197 | Loss | Gain |
| Chr24_CNVR_8  | Chr24 | 19968716 | 19977456 | 8741  | -0.9120186 | 0.531441  | 2.00E-188 | Loss | Gain |
| Chr24_CNVR_9  | Chr24 | 24850880 | 24859620 | 8741  | -1.210021  | 0.432262  | 5.83E-295 | Loss | Gain |
| Chr24_CNVR_1  | Chr24 | 44178516 | 44195122 | 16607 | 3.37139    | 10.3488   | 0         | Gain | Loss |
| Chr24_CNVR_2  | Chr24 | 56917066 | 56925806 | 8741  | 1.893909   | 3.71641   | 0         | Gain | Loss |
| Chr24_CNVR_3  | Chr24 | 56936294 | 56945908 | 9615  | 1.342933   | 2.53666   | 0         | Gain | Loss |
| Chr25_CNVR_1  | Chr25 | 2505536  | 2516599  | 11064 | -1.138869  | 0.454115  | 0         | Loss | Gain |
| Chr26_CNVR_1  | Chr26 | 2950607  | 2965685  | 15079 | 0.9642435  | 1.95104   | 0         | Gain | Loss |
| Chr26_CNVR_2  | Chr26 | 3309841  | 3320485  | 10645 | -3.443982  | 0.0918879 | 0         | Loss | Gain |
| Chr26_CNVR_3  | Chr26 | 25748281 | 25760697 | 12417 | -0.8700115 | 0.547142  | 7.98E-243 | Loss | Gain |
| Chr26_CNVR_4  | Chr26 | 31579419 | 31598045 | 18627 | -1.715489  | 0.304499  | 0         | Loss | Gain |
| Chr26_CNVR_5  | Chr26 | 51115593 | 51126237 | 10645 | -0.9100368 | 0.532172  | 1.05E-224 | Loss | Gain |
| Chr26_CNVR_6  | Chr26 | 51175023 | 51183891 | 8869  | -0.8337647 | 0.561063  | 5.52E-162 | Loss | Gain |
| Chr26_CNVR_7  | Chr26 | 51247757 | 51256625 | 8869  | -0.878844  | 0.543803  | 5.15E-177 | Loss | Gain |
| Chr26_CNVR_8  | Chr26 | 51273479 | 51283235 | 9757  | -0.8831413 | 0.542186  | 4.19E-196 | Loss | Gain |
| Chr26_CNVR_9  | Chr26 | 51495229 | 51504985 | 9757  | -0.8468581 | 0.555994  | 9.69E-183 | Loss | Gain |
| Chr26_CNVR_10 | Chr26 | 51563529 | 51575059 | 11531 | -0.867133  | 0.548235  | 2.24E-224 | Loss | Gain |
| Chr26_CNVR_11 | Chr26 | 51615861 | 51626505 | 10645 | -0.8505102 | 0.554589  | 1.28E-200 | Loss | Gain |
| Chr26_CNVR_12 | Chr26 | 51657551 | 51667307 | 9757  | -0.8276735 | 0.563437  | 8.97E-176 | Loss | Gain |
| Chr27_CNVR_1  | Chr27 | 1694754  | 1707388  | 12635 | 1.174462   | 2.25709   | 0         | Gain | Loss |
| Chr27_CNVR_2  | Chr27 | 3365898  | 3374542  | 8645  | 1.167616   | 2.2464    | 0         | Gain | Loss |
| Chr27_CNVR_7  | Chr27 | 5193318  | 5203292  | 9975  | -1.342585  | 0.394313  | 0         | Loss | Gain |
| Chr27_CNVR_8  | Chr27 | 5203958  | 5212602  | 8645  | -1.389825  | 0.381611  | 0         | Loss | Gain |
| Chr27_CNVR_9  | Chr27 | 5225904  | 5233218  | 7315  | -1.25267   | 0.419671  | 0         | Loss | Gain |
| Chr27_CNVR_3  | Chr27 | 5424074  | 5434048  | 9975  | 2.258293   | 4.78425   | 0         | Gain | Loss |
| Chr27_CNVR_4  | Chr27 | 5458654  | 5467962  | 9309  | 1.381144   | 2.60475   | 0         | Gain | Loss |
| Chr27_CNVR_10 | Chr27 | 5571038  | 5605618  | 34581 | -3.310061  | 0.100826  | 0         | Loss | Gain |
| Chr27_CNVR_11 | Chr27 | 5614928  | 5637538  | 22611 | -3.592885  | 0.082877  | 0         | Loss | Gain |
| Chr27_CNVR_12 | Chr27 | 5641528  | 5664802  | 23275 | -1.8566    | 0.276126  | 0         | Loss | Gain |
| Chr27_CNVR_5  | Chr27 | 5664804  | 5760562  | 95759 | 3.271079   | 9.65368   | 0         | Gain | Loss |
| Chr27_CNVR_6  | Chr27 | 5857654  | 5872282  | 14629 | 1.519316   | 2.86655   | 0         | Gain | Loss |
| Chr27_CNVR_13 | Chr27 | 5900214  | 5916838  | 16625 | -1.383047  | 0.383408  | 0         | Loss | Gain |
| Chr27_CNVR_14 | Chr27 | 6468124  | 6492728  | 24605 | -2.378992  | 0.192244  | 0         | Loss | Gain |
| Chr27_CNVR_15 | Chr27 | 28524178 | 28530828 | 6651  | -1.866935  | 0.274155  | 0         | Loss | Gain |
| Chr27_CNVR_16 | Chr27 | 34199954 | 34208598 | 8645  | -0.9139844 | 0.530717  | 4.88E-245 | Loss | Gain |
| Chr28_CNVR_1  | Chr28 | 2253257  | 2270707  | 17451 | 3.58101    | 11.9672   | 0         | Gain | Loss |
| Chr28_CNVR_3  | Chr28 | 2657955  | 2685377  | 27423 | -1.107955  | 0.463951  | 0         | Loss | Gain |

|               |       |           |           |       |            |           |           |      |      |
|---------------|-------|-----------|-----------|-------|------------|-----------|-----------|------|------|
| Chr28_CNVR_4  | Chr28 | 2708645   | 2721941   | 13297 | -0.8565658 | 0.552266  | 3.49E-270 | Loss | Gain |
| Chr28_CNVR_5  | Chr28 | 2745209   | 2758505   | 13297 | -0.8628691 | 0.549858  | 1.47E-273 | Loss | Gain |
| Chr28_CNVR_6  | Chr28 | 2819169   | 2827477   | 8309  | -1.012474  | 0.495695  | 1.56E-223 | Loss | Gain |
| Chr28_CNVR_7  | Chr28 | 26557515  | 26569147  | 11633 | -0.9845251 | 0.505392  | 2.90E-298 | Loss | Gain |
| Chr28_CNVR_8  | Chr28 | 29153559  | 29165191  | 11633 | -3.384373  | 0.095764  | 0         | Loss | Gain |
| Chr28_CNVR_2  | Chr28 | 29617257  | 29626397  | 9141  | 0.8477106  | 1.79964   | 2.34E-199 | Gain | Loss |
| Chr28_CNVR_9  | Chr28 | 35014601  | 35022911  | 8311  | -0.8647067 | 0.549158  | 2.22E-172 | Loss | Gain |
| Chr28_CNVR_10 | Chr28 | 35026235  | 35037037  | 10803 | -0.8674315 | 0.548122  | 1.17E-224 | Loss | Gain |
| Chr28_CNVR_11 | Chr28 | 35042855  | 35051165  | 8311  | -0.7934688 | 0.576955  | 6.53E-149 | Loss | Gain |
| Chr29_CNVR_1  | Chr29 | 4433563   | 4441123   | 7561  | 0.9309293  | 1.9065    | 2.13E-219 | Gain | Loss |
| Chr29_CNVR_2  | Chr29 | 9644671   | 9658279   | 13609 | 0.9935002  | 1.99101   | 0         | Gain | Loss |
| Chr29_CNVR_3  | Chr29 | 20004139  | 20012455  | 8317  | 1.009947   | 2.01384   | 2.53E-277 | Gain | Loss |
| Chr29_CNVR_4  | Chr29 | 22119427  | 22131523  | 12097 | 1.253479   | 2.38416   | 0         | Gain | Loss |
| Chr29_CNVR_5  | Chr29 | 26954803  | 26966899  | 12097 | 3.377507   | 10.3928   | 0         | Gain | Loss |
| Chr29_CNVR_9  | Chr29 | 27391015  | 27400843  | 9829  | -2.129332  | 0.228564  | 0         | Loss | Gain |
| Chr29_CNVR_6  | Chr29 | 28026811  | 28040419  | 13609 | 1.753447   | 3.37163   | 0         | Gain | Loss |
| Chr29_CNVR_7  | Chr29 | 38780911  | 38788471  | 7561  | 1.014373   | 2.02002   | 3.49E-254 | Gain | Loss |
| Chr29_CNVR_10 | Chr29 | 39341107  | 39366811  | 25705 | -4.4448    | 0.0459179 | 0         | Loss | Gain |
| Chr29_CNVR_8  | Chr29 | 42514795  | 42575275  | 60481 | 4.480784   | 22.328    | 0         | Gain | Loss |
| Chr29_CNVR_11 | Chr29 | 43527079  | 43534639  | 7561  | -0.8418487 | 0.557928  | 2.28E-164 | Loss | Gain |
| Chr29_CNVR_12 | Chr29 | 46952515  | 46962343  | 9829  | -0.8569274 | 0.552127  | 1.57E-219 | Loss | Gain |
| Chr29_CNVR_13 | Chr29 | 48365479  | 48377575  | 12097 | -0.8521272 | 0.553967  | 3.71E-267 | Loss | Gain |
| Chr29_CNVR_14 | Chr29 | 48500047  | 48508363  | 8317  | -0.8374784 | 0.559621  | 5.10E-179 | Loss | Gain |
| Chr29_CNVR_15 | Chr29 | 48518191  | 48526507  | 8317  | -0.9067777 | 0.533375  | 1.80E-204 | Loss | Gain |
| Chr29_CNVR_16 | Chr29 | 50342419  | 50351491  | 9073  | -0.9461608 | 0.519012  | 5.15E-239 | Loss | Gain |
| Chr3_CNVR_1   | Chr3  | 8518276   | 8539526   | 21251 | 4.621509   | 24.6157   | 0         | Gain | Loss |
| Chr3_CNVR_2   | Chr3  | 8612626   | 8670426   | 57801 | 4.194512   | 18.3094   | 0         | Gain | Loss |
| Chr3_CNVR_3   | Chr3  | 8732476   | 8752026   | 19551 | 5.215159   | 37.1466   | 0         | Gain | Loss |
| Chr3_CNVR_12  | Chr3  | 11866426  | 11887676  | 21251 | -2.140229  | 0.226844  | 0         | Loss | Gain |
| Chr3_CNVR_13  | Chr3  | 11893626  | 11907226  | 13601 | -2.480523  | 0.179179  | 0         | Loss | Gain |
| Chr3_CNVR_14  | Chr3  | 15578376  | 15587726  | 9351  | -0.8034535 | 0.572976  | 3.53E-167 | Loss | Gain |
| Chr3_CNVR_4   | Chr3  | 21309076  | 21320126  | 11051 | 1.192929   | 2.28616   | 0         | Gain | Loss |
| Chr3_CNVR_15  | Chr3  | 28178776  | 28187276  | 8501  | -0.9901801 | 0.503415  | 6.57E-216 | Loss | Gain |
| Chr3_CNVR_5   | Chr3  | 40003976  | 40013326  | 9351  | 1.030421   | 2.04262   | 5.76E-275 | Gain | Loss |
| Chr3_CNVR_6   | Chr3  | 46785276  | 46797176  | 11901 | 1.248826   | 2.37648   | 0         | Gain | Loss |
| Chr3_CNVR_16  | Chr3  | 47039426  | 47047926  | 8501  | -4.240238  | 0.0529129 | 0         | Loss | Gain |
| Chr3_CNVR_7   | Chr3  | 52501526  | 52510026  | 8501  | 0.8366523  | 1.7859    | 5.43E-175 | Gain | Loss |
| Chr3_CNVR_17  | Chr3  | 54367276  | 54381726  | 14451 | -2.825826  | 0.14104   | 0         | Loss | Gain |
| Chr3_CNVR_18  | Chr3  | 54394476  | 54447176  | 52701 | -3.284923  | 0.102598  | 0         | Loss | Gain |
| Chr3_CNVR_19  | Chr3  | 54458226  | 54536426  | 78201 | -2.983333  | 0.126452  | 0         | Loss | Gain |
| Chr3_CNVR_8   | Chr3  | 54765926  | 54799926  | 34001 | 3.165836   | 8.97453   | 0         | Gain | Loss |
| Chr3_CNVR_9   | Chr3  | 62693876  | 62710876  | 17001 | 1.330099   | 2.5142    | 0         | Gain | Loss |
| Chr3_CNVR_10  | Chr3  | 62821376  | 62829876  | 8501  | 1.051987   | 2.07338   | 6.65E-259 | Gain | Loss |
| Chr3_CNVR_20  | Chr3  | 99832926  | 99842276  | 9351  | -0.866977  | 0.548295  | 2.37E-190 | Loss | Gain |
| Chr3_CNVR_11  | Chr3  | 105709826 | 105725126 | 15301 | 1.027767   | 2.03887   | 0         | Gain | Loss |
| Chr3_CNVR_21  | Chr3  | 115799326 | 115812076 | 12751 | -0.833318  | 0.561237  | 6.32E-242 | Loss | Gain |
| Chr3_CNVR_22  | Chr3  | 119358276 | 119367626 | 9351  | -0.8084347 | 0.571001  | 5.77E-169 | Loss | Gain |
| Chr3_CNVR_23  | Chr3  | 120278826 | 120295826 | 17001 | -0.9226958 | 0.527522  | 0         | Loss | Gain |
| Chr3_CNVR_24  | Chr3  | 120364676 | 120379126 | 14451 | -0.8929507 | 0.538512  | 5.28E-308 | Loss | Gain |
| Chr3_CNVR_25  | Chr3  | 120412276 | 120423326 | 11051 | -0.9064694 | 0.533489  | 4.67E-242 | Loss | Gain |
| Chr3_CNVR_26  | Chr3  | 120492176 | 120500676 | 8501  | -0.9271899 | 0.525882  | 7.84E-194 | Loss | Gain |
| Chr3_CNVR_27  | Chr3  | 120662176 | 120670676 | 8501  | -0.909457  | 0.532385  | 1.04E-187 | Loss | Gain |
| Chr3_CNVR_28  | Chr3  | 120689376 | 120701276 | 11901 | -0.909737  | 0.532282  | 4.39E-262 | Loss | Gain |
| Chr3_CNVR_29  | Chr3  | 120842376 | 120852576 | 10201 | -0.8408668 | 0.558308  | 5.72E-197 | Loss | Gain |
| Chr3_CNVR_30  | Chr3  | 121089726 | 121099076 | 9351  | -0.8197953 | 0.566522  | 4.63E-173 | Loss | Gain |
| Chr3_CNVR_31  | Chr3  | 121244426 | 121260576 | 16151 | -0.8661557 | 0.548607  | 0         | Loss | Gain |

|              |      |           |           |       |            |           |           |      |      |
|--------------|------|-----------|-----------|-------|------------|-----------|-----------|------|------|
| Chr3_CNVR_32 | Chr3 | 121322626 | 121331126 | 8501  | -0.8572809 | 0.551992  | 5.69E-170 | Loss | Gain |
| Chr4_CNVR_1  | Chr4 | 2846998   | 2855217   | 8220  | 1.118265   | 2.17086   | 2.57E-279 | Gain | Loss |
| Chr4_CNVR_2  | Chr4 | 19987342  | 19996383  | 9042  | 1.269025   | 2.40999   | 0         | Gain | Loss |
| Chr4_CNVR_3  | Chr4 | 28241866  | 28254195  | 12330 | 4.178314   | 18.105    | 0         | Gain | Loss |
| Chr4_CNVR_7  | Chr4 | 31884970  | 31895655  | 10686 | -2.633829  | 0.161116  | 0         | Loss | Gain |
| Chr4_CNVR_8  | Chr4 | 43480924  | 43490787  | 9864  | -1.188825  | 0.43866   | 0         | Loss | Gain |
| Chr4_CNVR_9  | Chr4 | 47480776  | 47498859  | 18084 | -1.138972  | 0.454083  | 0         | Loss | Gain |
| Chr4_CNVR_10 | Chr4 | 50800012  | 50810697  | 10686 | -1.067424  | 0.47717   | 0         | Loss | Gain |
| Chr4_CNVR_11 | Chr4 | 51982048  | 51990267  | 8220  | -1.220362  | 0.429175  | 5.06E-301 | Loss | Gain |
| Chr4_CNVR_4  | Chr4 | 54383932  | 54396261  | 12330 | 0.9657789  | 1.95312   | 0         | Gain | Loss |
| Chr4_CNVR_12 | Chr4 | 69352552  | 69360771  | 8220  | -0.8412765 | 0.558149  | 5.28E-165 | Loss | Gain |
| Chr4_CNVR_5  | Chr4 | 73982878  | 73996851  | 13974 | 1.168092   | 2.24714   | 0         | Gain | Loss |
| Chr4_CNVR_13 | Chr4 | 75413158  | 75423021  | 9864  | -0.8581971 | 0.551641  | 1.97E-204 | Loss | Gain |
| Chr4_CNVR_14 | Chr4 | 77798602  | 77811753  | 13152 | -0.8422229 | 0.557783  | 2.94E-263 | Loss | Gain |
| Chr4_CNVR_15 | Chr4 | 86733742  | 86745249  | 11508 | -4.772185  | 0.0365956 | 0         | Loss | Gain |
| Chr4_CNVR_16 | Chr4 | 93070540  | 93079581  | 9042  | -0.830251  | 0.562431  | 3.03E-177 | Loss | Gain |
| Chr4_CNVR_17 | Chr4 | 96123448  | 96132489  | 9042  | -0.7980058 | 0.575144  | 1.54E-165 | Loss | Gain |
| Chr4_CNVR_18 | Chr4 | 98734120  | 98743983  | 9864  | -1.105003  | 0.464902  | 0         | Loss | Gain |
| Chr4_CNVR_19 | Chr4 | 106513528 | 106526679 | 13152 | -0.8450438 | 0.556694  | 8.97E-265 | Loss | Gain |
| Chr4_CNVR_6  | Chr4 | 109595206 | 109605891 | 10686 | 1.298159   | 2.45915   | 0         | Gain | Loss |
| Chr4_CNVR_20 | Chr4 | 114337324 | 114347187 | 9864  | -0.8281328 | 0.563258  | 2.53E-192 | Loss | Gain |
| Chr4_CNVR_21 | Chr4 | 114361162 | 114376779 | 15618 | -0.9638444 | 0.512689  | 0         | Loss | Gain |
| Chr4_CNVR_22 | Chr4 | 114378424 | 114388287 | 9864  | -0.9010383 | 0.535501  | 5.13E-222 | Loss | Gain |
| Chr4_CNVR_23 | Chr4 | 114419524 | 114437607 | 18084 | -0.9058075 | 0.533734  | 0         | Loss | Gain |
| Chr4_CNVR_24 | Chr4 | 114456514 | 114472953 | 16440 | -0.9209224 | 0.528171  | 0         | Loss | Gain |
| Chr4_CNVR_25 | Chr4 | 114473776 | 114489393 | 15618 | -0.9392124 | 0.521518  | 0         | Loss | Gain |
| Chr4_CNVR_26 | Chr4 | 114531316 | 114541179 | 9864  | -0.9022565 | 0.535049  | 1.60E-222 | Loss | Gain |
| Chr4_CNVR_27 | Chr4 | 114566662 | 114577347 | 10686 | -0.8184971 | 0.567032  | 5.09E-204 | Loss | Gain |
| Chr4_CNVR_28 | Chr4 | 115054930 | 115063971 | 9042  | -0.7772301 | 0.583486  | 4.00E-158 | Loss | Gain |
| Chr4_CNVR_29 | Chr4 | 115096030 | 115122333 | 26304 | -0.8863337 | 0.540987  | 0         | Loss | Gain |
| Chr4_CNVR_30 | Chr4 | 117887542 | 117899049 | 11508 | -0.8410406 | 0.558241  | 4.61E-230 | Loss | Gain |
| Chr4_CNVR_31 | Chr4 | 117908092 | 117917955 | 9864  | -0.9189949 | 0.528877  | 1.72E-229 | Loss | Gain |
| Chr4_CNVR_32 | Chr4 | 117932752 | 117942615 | 9864  | -0.871016  | 0.546762  | 1.18E-209 | Loss | Gain |
| Chr4_CNVR_33 | Chr4 | 118342930 | 118353615 | 10686 | -0.8467185 | 0.556048  | 2.93E-216 | Loss | Gain |
| Chr4_CNVR_34 | Chr4 | 118379920 | 118388961 | 9042  | -0.865743  | 0.548764  | 2.20E-190 | Loss | Gain |
| Chr4_CNVR_35 | Chr4 | 118405402 | 118416909 | 11508 | -0.8236242 | 0.565021  | 6.25E-222 | Loss | Gain |
| Chr4_CNVR_36 | Chr4 | 119114788 | 119123007 | 8220  | -0.821381  | 0.5659    | 2.27E-158 | Loss | Gain |
| Chr4_CNVR_37 | Chr4 | 119151778 | 119164929 | 13152 | -0.8711024 | 0.546729  | 7.07E-279 | Loss | Gain |
| Chr4_CNVR_38 | Chr4 | 119183014 | 119196165 | 13152 | -0.839435  | 0.558862  | 9.18E-262 | Loss | Gain |
| Chr4_CNVR_39 | Chr4 | 119439478 | 119449341 | 9864  | -0.8945197 | 0.537926  | 2.57E-219 | Loss | Gain |
| Chr4_CNVR_40 | Chr4 | 119492908 | 119507703 | 14796 | -0.889772  | 0.539699  | 0         | Loss | Gain |
| Chr4_CNVR_41 | Chr4 | 119540584 | 119571819 | 31236 | -0.9168608 | 0.52966   | 0         | Loss | Gain |
| Chr4_CNVR_42 | Chr4 | 119576752 | 119602233 | 25482 | -0.8396278 | 0.558788  | 0         | Loss | Gain |
| Chr4_CNVR_43 | Chr4 | 119676214 | 119686899 | 10686 | -0.8437295 | 0.557201  | 5.93E-215 | Loss | Gain |
| Chr4_CNVR_44 | Chr4 | 119698408 | 119709915 | 11508 | -0.8900966 | 0.539578  | 2.19E-253 | Loss | Gain |
| Chr4_CNVR_45 | Chr4 | 119710738 | 119723067 | 12330 | -1.532244  | 0.345739  | 0         | Loss | Gain |
| Chr4_CNVR_46 | Chr4 | 119728000 | 119736219 | 8220  | -0.8273516 | 0.563563  | 2.36E-160 | Loss | Gain |
| Chr4_CNVR_47 | Chr4 | 119737864 | 119748549 | 10686 | -0.886669  | 0.540861  | 6.59E-234 | Loss | Gain |
| Chr5_CNVR_1  | Chr5 | 4120849   | 4130353   | 9505  | 1.72396    | 3.30342   | 0         | Gain | Loss |
| Chr5_CNVR_21 | Chr5 | 23331889  | 23341393  | 9505  | -0.8523353 | 0.553887  | 4.43E-185 | Loss | Gain |
| Chr5_CNVR_22 | Chr5 | 26205553  | 26215057  | 9505  | -0.7897684 | 0.578437  | 2.15E-162 | Loss | Gain |
| Chr5_CNVR_2  | Chr5 | 27799633  | 27810865  | 11233 | 2.268466   | 4.81811   | 0         | Gain | Loss |
| Chr5_CNVR_23 | Chr5 | 27968977  | 27977617  | 8641  | -0.8129275 | 0.569226  | 2.32E-155 | Loss | Gain |
| Chr5_CNVR_24 | Chr5 | 31504465  | 31515697  | 11233 | -0.9289812 | 0.525229  | 2.10E-252 | Loss | Gain |
| Chr5_CNVR_3  | Chr5 | 44760817  | 44771185  | 10369 | 0.8394152  | 1.78932   | 1.36E-209 | Gain | Loss |
| Chr5_CNVR_25 | Chr5 | 56548369  | 56557009  | 8641  | -0.9451679 | 0.519369  | 2.75E-200 | Loss | Gain |

|              |      |           |           |       |            |           |           |      |      |
|--------------|------|-----------|-----------|-------|------------|-----------|-----------|------|------|
| Chr5_CNVR_26 | Chr5 | 56603665  | 56617489  | 13825 | -0.872269  | 0.546287  | 5.31E-279 | Loss | Gain |
| Chr5_CNVR_27 | Chr5 | 58031857  | 58040497  | 8641  | -0.9298646 | 0.524908  | 5.97E-195 | Loss | Gain |
| Chr5_CNVR_4  | Chr5 | 58067281  | 58075921  | 8641  | 0.894571   | 1.85906   | 1.49E-195 | Gain | Loss |
| Chr5_CNVR_5  | Chr5 | 58084561  | 58095793  | 11233 | 0.9283803  | 1.90314   | 2.33E-270 | Gain | Loss |
| Chr5_CNVR_6  | Chr5 | 58141585  | 58152817  | 11233 | 2.663596   | 6.3361    | 0         | Gain | Loss |
| Chr5_CNVR_28 | Chr5 | 58230577  | 58251313  | 20737 | -1.668321  | 0.314619  | 0         | Loss | Gain |
| Chr5_CNVR_7  | Chr5 | 58964977  | 59028913  | 63937 | 1.198455   | 2.29494   | 0         | Gain | Loss |
| Chr5_CNVR_8  | Chr5 | 59032369  | 59091985  | 59617 | 1.20798    | 2.31014   | 0         | Gain | Loss |
| Chr5_CNVR_9  | Chr5 | 59100625  | 59117905  | 17281 | 1.203126   | 2.30238   | 0         | Gain | Loss |
| Chr5_CNVR_10 | Chr5 | 59119633  | 59132593  | 12961 | 1.181467   | 2.26807   | 0         | Gain | Loss |
| Chr5_CNVR_11 | Chr5 | 59138641  | 59152465  | 13825 | 1.184674   | 2.27312   | 0         | Gain | Loss |
| Chr5_CNVR_12 | Chr5 | 59153329  | 59237137  | 83809 | 1.469787   | 2.76981   | 0         | Gain | Loss |
| Chr5_CNVR_29 | Chr5 | 59424625  | 59435857  | 11233 | -0.8653897 | 0.548898  | 4.60E-224 | Loss | Gain |
| Chr5_CNVR_30 | Chr5 | 60128785  | 60147793  | 19009 | -1.19689   | 0.436215  | 0         | Loss | Gain |
| Chr5_CNVR_13 | Chr5 | 63419761  | 63434449  | 14689 | 1.041008   | 2.05766   | 0         | Gain | Loss |
| Chr5_CNVR_14 | Chr5 | 68968369  | 68977009  | 8641  | 0.9771788  | 1.96861   | 1.90E-227 | Gain | Loss |
| Chr5_CNVR_31 | Chr5 | 74631889  | 74666449  | 34561 | -1.584191  | 0.333512  | 0         | Loss | Gain |
| Chr5_CNVR_32 | Chr5 | 74819377  | 74831473  | 12097 | -1.257185  | 0.418359  | 0         | Loss | Gain |
| Chr5_CNVR_33 | Chr5 | 76145617  | 76155121  | 9505  | -0.7806467 | 0.582106  | 3.70E-159 | Loss | Gain |
| Chr5_CNVR_15 | Chr5 | 76417777  | 76429009  | 11233 | 3.317993   | 9.97276   | 0         | Gain | Loss |
| Chr5_CNVR_34 | Chr5 | 99607537  | 99619633  | 12097 | -1.73826   | 0.299731  | 0         | Loss | Gain |
| Chr5_CNVR_16 | Chr5 | 99658513  | 99672337  | 13825 | 0.9756307  | 1.9665    | 0         | Gain | Loss |
| Chr5_CNVR_17 | Chr5 | 99674065  | 99687025  | 12961 | 1.048429   | 2.06828   | 0         | Gain | Loss |
| Chr5_CNVR_18 | Chr5 | 99727633  | 99741457  | 13825 | 1.119978   | 2.17344   | 0         | Gain | Loss |
| Chr5_CNVR_35 | Chr5 | 99808849  | 99820081  | 11233 | -1.336424  | 0.396001  | 0         | Loss | Gain |
| Chr5_CNVR_36 | Chr5 | 103357297 | 103366801 | 9505  | -3.433663  | 0.0925474 | 0         | Loss | Gain |
| Chr5_CNVR_37 | Chr5 | 103371121 | 103381489 | 10369 | -0.9126557 | 0.531206  | 2.30E-226 | Loss | Gain |
| Chr5_CNVR_38 | Chr5 | 103398769 | 103427281 | 28513 | -2.783438  | 0.145245  | 0         | Loss | Gain |
| Chr5_CNVR_39 | Chr5 | 104013937 | 104022577 | 8641  | -0.7840878 | 0.580719  | 5.56E-146 | Loss | Gain |
| Chr5_CNVR_40 | Chr5 | 106852177 | 106864273 | 12097 | -0.8744401 | 0.545466  | 2.00E-245 | Loss | Gain |
| Chr5_CNVR_41 | Chr5 | 107032753 | 107049169 | 16417 | -0.8746888 | 0.545371  | 0         | Loss | Gain |
| Chr5_CNVR_42 | Chr5 | 107064721 | 107091505 | 26785 | -0.8721358 | 0.546337  | 0         | Loss | Gain |
| Chr5_CNVR_43 | Chr5 | 107092369 | 107103601 | 11233 | -0.8263748 | 0.563945  | 4.14E-207 | Loss | Gain |
| Chr5_CNVR_44 | Chr5 | 107110513 | 107128657 | 18145 | -0.8897706 | 0.5397    | 0         | Loss | Gain |
| Chr5_CNVR_45 | Chr5 | 107131249 | 107141617 | 10369 | -0.8968223 | 0.537068  | 7.91E-220 | Loss | Gain |
| Chr5_CNVR_46 | Chr5 | 107158897 | 107169265 | 10369 | -0.8745099 | 0.545439  | 1.08E-210 | Loss | Gain |
| Chr5_CNVR_47 | Chr5 | 107615089 | 107628913 | 13825 | -0.8290573 | 0.562897  | 7.79E-256 | Loss | Gain |
| Chr5_CNVR_48 | Chr5 | 107641873 | 107653969 | 12097 | -0.8615157 | 0.550374  | 2.63E-239 | Loss | Gain |
| Chr5_CNVR_49 | Chr5 | 109243729 | 109256689 | 12961 | -0.8825044 | 0.542425  | 6.49E-267 | Loss | Gain |
| Chr5_CNVR_50 | Chr5 | 109715473 | 109733617 | 18145 | -0.8515883 | 0.554174  | 0         | Loss | Gain |
| Chr5_CNVR_51 | Chr5 | 109734481 | 109745713 | 11233 | -0.8450662 | 0.556685  | 3.46E-215 | Loss | Gain |
| Chr5_CNVR_52 | Chr5 | 110009233 | 110019601 | 10369 | -0.8812046 | 0.542914  | 2.00E-213 | Loss | Gain |
| Chr5_CNVR_53 | Chr5 | 111524689 | 111533329 | 8641  | -0.8879612 | 0.540377  | 1.66E-180 | Loss | Gain |
| Chr5_CNVR_54 | Chr5 | 112210705 | 112219345 | 8641  | -2.655855  | 0.158675  | 0         | Loss | Gain |
| Chr5_CNVR_55 | Chr5 | 112977937 | 112986577 | 8641  | -0.8801711 | 0.543303  | 7.53E-178 | Loss | Gain |
| Chr5_CNVR_56 | Chr5 | 114602257 | 114614353 | 12097 | -0.873544  | 0.545804  | 5.33E-245 | Loss | Gain |
| Chr5_CNVR_57 | Chr5 | 114698161 | 114708529 | 10369 | -0.8787228 | 0.543849  | 2.06E-212 | Loss | Gain |
| Chr5_CNVR_58 | Chr5 | 114730993 | 114741361 | 10369 | -0.8034671 | 0.572971  | 2.62E-182 | Loss | Gain |
| Chr5_CNVR_59 | Chr5 | 114812209 | 114821713 | 9505  | -0.7816463 | 0.581703  | 1.64E-159 | Loss | Gain |
| Chr5_CNVR_60 | Chr5 | 115480945 | 115489585 | 8641  | -0.8843441 | 0.541734  | 2.85E-179 | Loss | Gain |
| Chr5_CNVR_61 | Chr5 | 115514641 | 115523281 | 8641  | -0.8854807 | 0.541307  | 1.17E-179 | Loss | Gain |
| Chr5_CNVR_62 | Chr5 | 115556977 | 115565617 | 8641  | -1.001124  | 0.499611  | 4.78E-220 | Loss | Gain |
| Chr5_CNVR_63 | Chr5 | 115574257 | 115583761 | 9505  | -0.904299  | 0.534292  | 1.65E-204 | Loss | Gain |
| Chr5_CNVR_64 | Chr5 | 115762609 | 115772977 | 10369 | -0.8146558 | 0.568544  | 1.05E-186 | Loss | Gain |
| Chr5_CNVR_65 | Chr5 | 115929361 | 115940593 | 11233 | -0.8930616 | 0.53847   | 2.69E-236 | Loss | Gain |
| Chr5_CNVR_66 | Chr5 | 115994161 | 116014033 | 19873 | -0.8869888 | 0.540742  | 0         | Loss | Gain |

|              |      |           |           |       |            |           |           |      |      |
|--------------|------|-----------|-----------|-------|------------|-----------|-----------|------|------|
| Chr5_CNVR_67 | Chr5 | 116046865 | 116056369 | 9505  | -0.8733495 | 0.545878  | 7.05E-193 | Loss | Gain |
| Chr5_CNVR_68 | Chr5 | 116058097 | 116066737 | 8641  | -0.8646887 | 0.549165  | 1.34E-172 | Loss | Gain |
| Chr5_CNVR_69 | Chr5 | 116078833 | 116091793 | 12961 | -0.9398126 | 0.521301  | 1.46E-296 | Loss | Gain |
| Chr5_CNVR_70 | Chr5 | 116098705 | 116107345 | 8641  | -0.898617  | 0.536401  | 3.74E-184 | Loss | Gain |
| Chr5_CNVR_71 | Chr5 | 116122897 | 116131537 | 8641  | -0.8737829 | 0.545714  | 1.12E-175 | Loss | Gain |
| Chr5_CNVR_72 | Chr5 | 116133265 | 116144497 | 11233 | -0.8604738 | 0.550772  | 6.58E-222 | Loss | Gain |
| Chr5_CNVR_73 | Chr5 | 116170417 | 116181649 | 11233 | -0.8900356 | 0.539601  | 5.97E-235 | Loss | Gain |
| Chr5_CNVR_19 | Chr5 | 117385201 | 117393841 | 8641  | 1.295167   | 2.45405   | 0         | Gain | Loss |
| Chr5_CNVR_20 | Chr5 | 117401617 | 117417169 | 15553 | 1.771659   | 3.41446   | 0         | Gain | Loss |
| Chr5_CNVR_74 | Chr5 | 117739441 | 117750673 | 11233 | -0.8564388 | 0.552314  | 3.84E-220 | Loss | Gain |
| Chr5_CNVR_75 | Chr5 | 117765361 | 117774001 | 8641  | -0.9109359 | 0.53184   | 2.15E-188 | Loss | Gain |
| Chr5_CNVR_76 | Chr5 | 117774865 | 117783505 | 8641  | -0.9003211 | 0.535767  | 9.72E-185 | Loss | Gain |
| Chr5_CNVR_77 | Chr5 | 117805105 | 117823249 | 18145 | -0.899316  | 0.536141  | 0         | Loss | Gain |
| Chr5_CNVR_78 | Chr5 | 117871633 | 117881137 | 9505  | -0.9573163 | 0.515014  | 8.63E-225 | Loss | Gain |
| Chr5_CNVR_79 | Chr5 | 117952849 | 117968401 | 15553 | -0.9247612 | 0.526768  | 0         | Loss | Gain |
| Chr5_CNVR_80 | Chr5 | 118011601 | 118021105 | 9505  | -0.9485796 | 0.518142  | 2.03E-221 | Loss | Gain |
| Chr5_CNVR_81 | Chr5 | 118032337 | 118045297 | 12961 | -0.8825621 | 0.542403  | 6.07E-267 | Loss | Gain |
| Chr5_CNVR_82 | Chr5 | 118060849 | 118072081 | 11233 | -0.9144852 | 0.530533  | 7.13E-246 | Loss | Gain |
| Chr5_CNVR_83 | Chr5 | 118098865 | 118108369 | 9505  | -0.8358498 | 0.560253  | 5.06E-179 | Loss | Gain |
| Chr5_CNVR_84 | Chr5 | 118117873 | 118129105 | 11233 | -0.8376687 | 0.559547  | 5.58E-212 | Loss | Gain |
| Chr5_CNVR_85 | Chr5 | 118158481 | 118168849 | 10369 | -0.8487559 | 0.555263  | 2.82E-200 | Loss | Gain |
| Chr5_CNVR_86 | Chr5 | 118177489 | 118190449 | 12961 | -0.8539772 | 0.553257  | 1.92E-252 | Loss | Gain |
| Chr5_CNVR_87 | Chr5 | 119500273 | 119508913 | 8641  | -0.9072507 | 0.5332    | 4.02E-187 | Loss | Gain |
| Chr5_CNVR_88 | Chr5 | 119543473 | 119562481 | 19009 | -0.8757347 | 0.544976  | 0         | Loss | Gain |
| Chr5_CNVR_89 | Chr5 | 119570257 | 119585809 | 15553 | -0.8807686 | 0.543078  | 0         | Loss | Gain |
| Chr5_CNVR_90 | Chr5 | 119887345 | 119899441 | 12097 | -0.8193248 | 0.566707  | 1.27E-219 | Loss | Gain |
| Chr5_CNVR_91 | Chr5 | 120853297 | 120861937 | 8641  | -0.9170867 | 0.529577  | 1.61E-190 | Loss | Gain |
| Chr5_CNVR_92 | Chr5 | 120865393 | 120877489 | 12097 | -0.9088315 | 0.532616  | 6.85E-262 | Loss | Gain |
| Chr5_CNVR_93 | Chr5 | 120893041 | 120909457 | 16417 | -0.8729798 | 0.546018  | 0         | Loss | Gain |
| Chr5_CNVR_94 | Chr5 | 120911185 | 120924145 | 12961 | -0.8823533 | 0.542482  | 7.76E-267 | Loss | Gain |
| Chr6_CNVR_1  | Chr6 | 2667601   | 2675601   | 8001  | 6.081313   | 67.7108   | 0         | Gain | Loss |
| Chr6_CNVR_9  | Chr6 | 9093201   | 9104401   | 11201 | -3.575161  | 0.0839014 | 0         | Loss | Gain |
| Chr6_CNVR_10 | Chr6 | 23130801  | 23141201  | 10401 | -3.114597  | 0.115455  | 0         | Loss | Gain |
| Chr6_CNVR_2  | Chr6 | 36456401  | 36464401  | 8001  | 2.300488   | 4.92624   | 0         | Gain | Loss |
| Chr6_CNVR_3  | Chr6 | 38832401  | 38842001  | 9601  | 1.036748   | 2.0516    | 2.51E-291 | Gain | Loss |
| Chr6_CNVR_4  | Chr6 | 53174801  | 53185201  | 10401 | 3.63668    | 12.438    | 0         | Gain | Loss |
| Chr6_CNVR_11 | Chr6 | 56225201  | 56235601  | 10401 | -1.086203  | 0.470999  | 0         | Loss | Gain |
| Chr6_CNVR_5  | Chr6 | 58298001  | 58308401  | 10401 | 0.9706519  | 1.95973   | 1.12E-282 | Gain | Loss |
| Chr6_CNVR_6  | Chr6 | 60766801  | 60775601  | 8801  | 0.9259921  | 1.89999   | 3.51E-221 | Gain | Loss |
| Chr6_CNVR_7  | Chr6 | 80735601  | 80757201  | 21601 | 1.227916   | 2.34228   | 0         | Gain | Loss |
| Chr6_CNVR_8  | Chr6 | 86131601  | 86150001  | 18401 | 1.184984   | 2.27361   | 0         | Gain | Loss |
| Chr6_CNVR_12 | Chr6 | 88681201  | 88694001  | 12801 | -1.327714  | 0.398399  | 0         | Loss | Gain |
| Chr6_CNVR_13 | Chr6 | 104630801 | 104653201 | 22401 | -0.8521651 | 0.553953  | 0         | Loss | Gain |
| Chr6_CNVR_14 | Chr6 | 104656401 | 104666001 | 9601  | -0.8857057 | 0.541223  | 7.57E-216 | Loss | Gain |
| Chr6_CNVR_15 | Chr6 | 106075601 | 106088401 | 12801 | -0.810446  | 0.570206  | 1.99E-246 | Loss | Gain |
| Chr6_CNVR_16 | Chr6 | 106767601 | 106775601 | 8001  | -0.8547203 | 0.552973  | 1.26E-169 | Loss | Gain |
| Chr6_CNVR_17 | Chr6 | 106810801 | 106823601 | 12801 | -0.9032777 | 0.534671  | 8.25E-297 | Loss | Gain |
| Chr6_CNVR_18 | Chr6 | 106824401 | 106858801 | 34401 | -0.9437056 | 0.519896  | 0         | Loss | Gain |
| Chr6_CNVR_19 | Chr6 | 106861201 | 106870001 | 8801  | -1.032519  | 0.488856  | 2.27E-255 | Loss | Gain |
| Chr6_CNVR_20 | Chr6 | 106897201 | 106906801 | 9601  | -0.8981638 | 0.536569  | 5.16E-221 | Loss | Gain |
| Chr6_CNVR_21 | Chr6 | 106917201 | 106932401 | 15201 | -0.9244814 | 0.52687   | 0         | Loss | Gain |
| Chr6_CNVR_22 | Chr6 | 106933201 | 106943601 | 10401 | -0.8667445 | 0.548383  | 3.31E-225 | Loss | Gain |
| Chr6_CNVR_23 | Chr6 | 106944401 | 106960401 | 16001 | -0.9343738 | 0.52327   | 0         | Loss | Gain |
| Chr6_CNVR_24 | Chr6 | 106962001 | 106971601 | 9601  | -0.9209167 | 0.528173  | 1.59E-230 | Loss | Gain |
| Chr6_CNVR_25 | Chr6 | 106983601 | 106998001 | 14401 | -0.9797077 | 0.507082  | 0         | Loss | Gain |
| Chr6_CNVR_26 | Chr6 | 107016401 | 107033201 | 16801 | -1.074183  | 0.47494   | 0         | Loss | Gain |

|              |      |           |           |       |            |          |           |      |      |
|--------------|------|-----------|-----------|-------|------------|----------|-----------|------|------|
| Chr6_CNVR_27 | Chr6 | 107034001 | 107050001 | 16001 | -0.9368736 | 0.522364 | 0         | Loss | Gain |
| Chr6_CNVR_28 | Chr6 | 107059601 | 107076401 | 16801 | -0.9080539 | 0.532903 | 0         | Loss | Gain |
| Chr6_CNVR_29 | Chr6 | 107086001 | 107108401 | 22401 | -0.8919671 | 0.538879 | 0         | Loss | Gain |
| Chr6_CNVR_30 | Chr6 | 107155601 | 107177201 | 21601 | -0.8729428 | 0.546032 | 0         | Loss | Gain |
| Chr6_CNVR_31 | Chr6 | 107187601 | 107208401 | 20801 | -0.9336012 | 0.52355  | 0         | Loss | Gain |
| Chr6_CNVR_32 | Chr6 | 107238001 | 107249201 | 11201 | -0.9767684 | 0.508117 | 2.86E-296 | Loss | Gain |
| Chr6_CNVR_33 | Chr6 | 107250001 | 107261201 | 11201 | -0.9839123 | 0.505607 | 7.52E-300 | Loss | Gain |
| Chr6_CNVR_34 | Chr6 | 107262801 | 107275601 | 12801 | -1.031831  | 0.489089 | 0         | Loss | Gain |
| Chr6_CNVR_35 | Chr6 | 107297201 | 107306001 | 8801  | -0.9950992 | 0.501701 | 1.77E-240 | Loss | Gain |
| Chr6_CNVR_36 | Chr6 | 107314001 | 107326001 | 12001 | -0.8954489 | 0.53758  | 2.53E-274 | Loss | Gain |
| Chr6_CNVR_37 | Chr6 | 107673201 | 107681201 | 8001  | -0.9049568 | 0.534049 | 6.95E-187 | Loss | Gain |
| Chr6_CNVR_38 | Chr6 | 107687601 | 107702801 | 15201 | -0.854921  | 0.552896 | 0         | Loss | Gain |
| Chr6_CNVR_39 | Chr6 | 107754801 | 107772401 | 17601 | -0.9100095 | 0.532182 | 0         | Loss | Gain |
| Chr6_CNVR_40 | Chr6 | 107775601 | 107784401 | 8801  | -0.9495748 | 0.517785 | 1.36E-222 | Loss | Gain |
| Chr6_CNVR_41 | Chr6 | 107786801 | 107795601 | 8801  | -1.000432  | 0.49985  | 1.37E-242 | Loss | Gain |
| Chr6_CNVR_42 | Chr6 | 108086001 | 108094001 | 8001  | -0.8611568 | 0.550511 | 8.21E-172 | Loss | Gain |
| Chr6_CNVR_43 | Chr6 | 108349201 | 108361201 | 12001 | -0.8330558 | 0.561339 | 1.93E-242 | Loss | Gain |
| Chr6_CNVR_44 | Chr6 | 108366001 | 108376401 | 10401 | -0.9416599 | 0.520634 | 4.86E-259 | Loss | Gain |
| Chr6_CNVR_45 | Chr6 | 108406001 | 108418001 | 12001 | -0.8985475 | 0.536427 | 6.21E-276 | Loss | Gain |
| Chr6_CNVR_46 | Chr6 | 108426001 | 108437201 | 11201 | -0.8562996 | 0.552368 | 2.17E-237 | Loss | Gain |
| Chr6_CNVR_47 | Chr6 | 108954001 | 108962001 | 8001  | -0.8340875 | 0.560938 | 1.15E-162 | Loss | Gain |
| Chr6_CNVR_48 | Chr6 | 109002801 | 109010801 | 8001  | -0.8601293 | 0.550903 | 1.84E-171 | Loss | Gain |
| Chr6_CNVR_49 | Chr6 | 109036401 | 109049201 | 12801 | -0.9562099 | 0.515409 | 0         | Loss | Gain |
| Chr6_CNVR_50 | Chr6 | 109078001 | 109087601 | 9601  | -0.9498578 | 0.517683 | 9.31E-243 | Loss | Gain |
| Chr6_CNVR_51 | Chr6 | 109106001 | 109118001 | 12001 | -0.9178142 | 0.52931  | 5.41E-286 | Loss | Gain |
| Chr6_CNVR_52 | Chr6 | 109342001 | 109350001 | 8001  | -0.9897437 | 0.503567 | 6.98E-217 | Loss | Gain |
| Chr6_CNVR_53 | Chr6 | 109371601 | 109382801 | 11201 | -0.8614428 | 0.550402 | 7.74E-240 | Loss | Gain |
| Chr6_CNVR_54 | Chr6 | 109400401 | 109410001 | 9601  | -0.8368791 | 0.559853 | 6.52E-196 | Loss | Gain |
| Chr6_CNVR_55 | Chr6 | 109445201 | 109454801 | 9601  | -0.9764588 | 0.508226 | 4.04E-254 | Loss | Gain |
| Chr6_CNVR_56 | Chr6 | 109474001 | 109486001 | 12001 | -0.9414152 | 0.520722 | 1.98E-298 | Loss | Gain |
| Chr6_CNVR_57 | Chr6 | 109502001 | 109510801 | 8801  | -1.053811  | 0.481694 | 6.54E-264 | Loss | Gain |
| Chr6_CNVR_58 | Chr6 | 109520401 | 109535601 | 15201 | -0.9301393 | 0.524808 | 0         | Loss | Gain |
| Chr6_CNVR_59 | Chr6 | 109546801 | 109562001 | 15201 | -0.9118627 | 0.531498 | 0         | Loss | Gain |
| Chr6_CNVR_60 | Chr6 | 109567601 | 109578001 | 10401 | -0.9623045 | 0.513236 | 1.49E-268 | Loss | Gain |
| Chr6_CNVR_61 | Chr6 | 109591601 | 109626001 | 34401 | -0.8844689 | 0.541687 | 0         | Loss | Gain |
| Chr6_CNVR_62 | Chr6 | 109719601 | 109736401 | 16801 | -0.9216883 | 0.527891 | 0         | Loss | Gain |
| Chr6_CNVR_63 | Chr6 | 109737201 | 109748401 | 11201 | -0.8742183 | 0.545549 | 6.06E-246 | Loss | Gain |
| Chr6_CNVR_64 | Chr6 | 109764401 | 109773201 | 8801  | -0.8695603 | 0.547314 | 6.12E-192 | Loss | Gain |
| Chr6_CNVR_65 | Chr6 | 109810801 | 109819601 | 8801  | -0.8969519 | 0.53702  | 2.62E-202 | Loss | Gain |
| Chr6_CNVR_66 | Chr6 | 109850801 | 109864401 | 13601 | -0.9210356 | 0.52813  | 0         | Loss | Gain |
| Chr6_CNVR_67 | Chr6 | 118199601 | 118207601 | 8001  | -0.8993966 | 0.536111 | 5.93E-185 | Loss | Gain |
| Chr6_CNVR_68 | Chr6 | 118356401 | 118365201 | 8801  | -0.8611542 | 0.550512 | 8.72E-189 | Loss | Gain |
| Chr6_CNVR_69 | Chr6 | 118398001 | 118410801 | 12801 | -0.8865997 | 0.540887 | 1.41E-287 | Loss | Gain |
| Chr6_CNVR_70 | Chr6 | 118456401 | 118466001 | 9601  | -0.8305872 | 0.5623   | 2.21E-193 | Loss | Gain |
| Chr6_CNVR_71 | Chr6 | 118511601 | 118520401 | 8801  | -0.9305102 | 0.524673 | 3.41E-215 | Loss | Gain |
| Chr6_CNVR_72 | Chr6 | 118521201 | 118531601 | 10401 | -1.001572  | 0.499455 | 7.69E-287 | Loss | Gain |
| Chr6_CNVR_73 | Chr6 | 118532401 | 118543601 | 11201 | -0.9153789 | 0.530205 | 7.03E-266 | Loss | Gain |
| Chr6_CNVR_74 | Chr6 | 118544401 | 118570001 | 25601 | -0.9274489 | 0.525787 | 0         | Loss | Gain |
| Chr6_CNVR_75 | Chr6 | 118580401 | 118601201 | 20801 | -0.9050323 | 0.534021 | 0         | Loss | Gain |
| Chr6_CNVR_76 | Chr6 | 118609201 | 118617201 | 8001  | -0.8895278 | 0.539791 | 1.54E-181 | Loss | Gain |
| Chr6_CNVR_77 | Chr6 | 118630001 | 118642001 | 12001 | -0.9192379 | 0.528788 | 9.69E-287 | Loss | Gain |
| Chr6_CNVR_78 | Chr6 | 118666801 | 118679601 | 12801 | -0.9130071 | 0.531077 | 3.15E-302 | Loss | Gain |
| Chr6_CNVR_79 | Chr6 | 118688401 | 118697201 | 8801  | -0.8820745 | 0.542587 | 1.17E-196 | Loss | Gain |
| Chr6_CNVR_80 | Chr6 | 118730801 | 118747601 | 16801 | -0.9207281 | 0.528242 | 0         | Loss | Gain |
| Chr6_CNVR_81 | Chr6 | 118770001 | 118784401 | 14401 | -0.8731035 | 0.545971 | 0         | Loss | Gain |
| Chr6_CNVR_82 | Chr6 | 118795601 | 118810801 | 15201 | -0.9041117 | 0.534362 | 0         | Loss | Gain |



|               |      |           |           |       |            |           |           |      |      |
|---------------|------|-----------|-----------|-------|------------|-----------|-----------|------|------|
| Chr6_CNVR_83  | Chr6 | 118815601 | 118824401 | 8801  | -0.9863442 | 0.504755  | 5.12E-237 | Loss | Gain |
| Chr6_CNVR_84  | Chr6 | 118845201 | 118870801 | 25601 | -0.8997159 | 0.535992  | 0         | Loss | Gain |
| Chr6_CNVR_85  | Chr6 | 118880401 | 118888401 | 8001  | -0.9007505 | 0.535608  | 2.01E-185 | Loss | Gain |
| Chr6_CNVR_86  | Chr6 | 118891601 | 118900401 | 8801  | -0.9460303 | 0.519059  | 3.25E-221 | Loss | Gain |
| Chr6_CNVR_87  | Chr6 | 118904401 | 118913201 | 8801  | -0.8799199 | 0.543398  | 7.62E-196 | Loss | Gain |
| Chr6_CNVR_88  | Chr6 | 119055601 | 119066801 | 11201 | -0.8636204 | 0.549572  | 7.10E-241 | Loss | Gain |
| Chr6_CNVR_89  | Chr6 | 119093201 | 119114001 | 20801 | -0.8545753 | 0.553028  | 0         | Loss | Gain |
| Chr6_CNVR_90  | Chr6 | 119130801 | 119142001 | 11201 | -0.8512799 | 0.554293  | 5.21E-235 | Loss | Gain |
| Chr6_CNVR_91  | Chr6 | 119143601 | 119157201 | 13601 | -0.9549759 | 0.51585   | 0         | Loss | Gain |
| Chr6_CNVR_92  | Chr6 | 119198001 | 119241201 | 43201 | -0.9967645 | 0.501123  | 0         | Loss | Gain |
| Chr6_CNVR_93  | Chr6 | 119242001 | 119254801 | 12801 | -0.9638915 | 0.512672  | 0         | Loss | Gain |
| Chr6_CNVR_94  | Chr6 | 119270801 | 119278801 | 8001  | -1.065768  | 0.477718  | 1.72E-244 | Loss | Gain |
| Chr6_CNVR_95  | Chr6 | 119279601 | 119304401 | 24801 | -0.9136625 | 0.530836  | 0         | Loss | Gain |
| Chr6_CNVR_96  | Chr6 | 119305201 | 119314001 | 8801  | -0.8684013 | 0.547753  | 1.67E-191 | Loss | Gain |
| Chr6_CNVR_97  | Chr6 | 119321201 | 119330001 | 8801  | -0.9487063 | 0.518097  | 2.95E-222 | Loss | Gain |
| Chr6_CNVR_98  | Chr6 | 119338801 | 119346801 | 8001  | -0.9268176 | 0.526017  | 1.60E-194 | Loss | Gain |
| Chr6_CNVR_99  | Chr6 | 119353201 | 119365201 | 12001 | -1.006853  | 0.497631  | 0         | Loss | Gain |
| Chr6_CNVR_100 | Chr6 | 119369201 | 119379601 | 10401 | -0.9056635 | 0.533787  | 1.22E-242 | Loss | Gain |
| Chr6_CNVR_101 | Chr6 | 119392401 | 119401201 | 8801  | -0.9547122 | 0.515945  | 1.34E-224 | Loss | Gain |
| Chr6_CNVR_102 | Chr6 | 119408401 | 119431601 | 23201 | -0.9027678 | 0.53486   | 0         | Loss | Gain |
| Chr6_CNVR_103 | Chr6 | 119434001 | 119442001 | 8001  | -0.9873591 | 0.5044    | 5.01E-216 | Loss | Gain |
| Chr8_CNVR_1   | Chr8 | 14241753  | 14249593  | 7841  | 2.512492   | 5.70605   | 0         | Gain | Loss |
| Chr8_CNVR_14  | Chr8 | 15646681  | 15657657  | 10977 | -1.357624  | 0.390224  | 0         | Loss | Gain |
| Chr8_CNVR_2   | Chr8 | 23173081  | 23185625  | 12545 | 1.319173   | 2.49523   | 0         | Gain | Loss |
| Chr8_CNVR_3   | Chr8 | 26915897  | 26926873  | 10977 | 3.305223   | 9.88488   | 0         | Gain | Loss |
| Chr8_CNVR_4   | Chr8 | 34624185  | 34638297  | 14113 | 1.386395   | 2.61425   | 0         | Gain | Loss |
| Chr8_CNVR_5   | Chr8 | 34639865  | 34669657  | 29793 | 1.296963   | 2.45711   | 0         | Gain | Loss |
| Chr8_CNVR_6   | Chr8 | 35137705  | 35146329  | 8625  | 0.8510869  | 1.80386   | 8.72E-198 | Gain | Loss |
| Chr8_CNVR_7   | Chr8 | 35660633  | 35668473  | 7841  | 0.9131651  | 1.88317   | 1.94E-203 | Gain | Loss |
| Chr8_CNVR_8   | Chr8 | 39006745  | 39014585  | 7841  | 1.134591   | 2.19556   | 3.38E-292 | Gain | Loss |
| Chr8_CNVR_9   | Chr8 | 44936921  | 44948681  | 11761 | 3.824135   | 14.1638   | 0         | Gain | Loss |
| Chr8_CNVR_15  | Chr8 | 60536169  | 60551849  | 15681 | -1.188888  | 0.438641  | 0         | Loss | Gain |
| Chr8_CNVR_10  | Chr8 | 61629065  | 61636905  | 7841  | 0.8957664  | 1.8606    | 8.71E-197 | Gain | Loss |
| Chr8_CNVR_11  | Chr8 | 61640041  | 61651017  | 10977 | 0.9461727  | 1.92675   | 7.59E-302 | Gain | Loss |
| Chr8_CNVR_12  | Chr8 | 66197433  | 66208409  | 10977 | 3.287822   | 9.76637   | 0         | Gain | Loss |
| Chr8_CNVR_16  | Chr8 | 69977097  | 69984937  | 7841  | -0.8813153 | 0.542872  | 3.79E-178 | Loss | Gain |
| Chr8_CNVR_17  | Chr8 | 70692889  | 70703081  | 10193 | -0.9751869 | 0.508674  | 2.84E-273 | Loss | Gain |
| Chr8_CNVR_18  | Chr8 | 70812057  | 70821465  | 9409  | -1.025654  | 0.491188  | 6.09E-274 | Loss | Gain |
| Chr8_CNVR_19  | Chr8 | 70829305  | 70840281  | 10977 | -1.500493  | 0.353433  | 0         | Loss | Gain |
| Chr8_CNVR_20  | Chr8 | 70841849  | 70874777  | 32929 | -2.140909  | 0.226737  | 0         | Loss | Gain |
| Chr8_CNVR_21  | Chr8 | 70887321  | 70901433  | 14113 | -1.074851  | 0.47472   | 0         | Loss | Gain |
| Chr8_CNVR_22  | Chr8 | 70972777  | 71004137  | 31361 | -1.177253  | 0.442193  | 0         | Loss | Gain |
| Chr8_CNVR_23  | Chr8 | 71015113  | 71049609  | 34497 | -1.252025  | 0.419858  | 0         | Loss | Gain |
| Chr8_CNVR_24  | Chr8 | 71051961  | 71076265  | 24305 | -1.204397  | 0.433951  | 0         | Loss | Gain |
| Chr8_CNVR_25  | Chr8 | 71086457  | 71104489  | 18033 | -1.017629  | 0.493927  | 0         | Loss | Gain |
| Chr8_CNVR_26  | Chr8 | 71105273  | 71135065  | 29793 | -1.033346  | 0.488576  | 0         | Loss | Gain |
| Chr8_CNVR_27  | Chr8 | 71150745  | 71169561  | 18817 | -1.35212   | 0.391716  | 0         | Loss | Gain |
| Chr8_CNVR_28  | Chr8 | 71175049  | 71198569  | 23521 | -1.650903  | 0.318441  | 0         | Loss | Gain |
| Chr8_CNVR_29  | Chr8 | 71231497  | 71242473  | 10977 | -1.194546  | 0.436924  | 0         | Loss | Gain |
| Chr8_CNVR_30  | Chr8 | 77274569  | 77284761  | 10193 | -0.8864884 | 0.540929  | 2.97E-233 | Loss | Gain |
| Chr8_CNVR_31  | Chr8 | 77946457  | 77958217  | 11761 | -3.325323  | 0.099765  | 0         | Loss | Gain |
| Chr8_CNVR_32  | Chr8 | 83232969  | 83259625  | 26657 | -1.307586  | 0.403996  | 0         | Loss | Gain |
| Chr8_CNVR_33  | Chr8 | 91971433  | 91979273  | 7841  | -5.105314  | 0.0290501 | 0         | Loss | Gain |
| Chr8_CNVR_13  | Chr8 | 93817753  | 93825593  | 7841  | 1.065654   | 2.09312   | 6.54E-264 | Gain | Loss |
| Chr8_CNVR_34  | Chr8 | 105235929 | 105245337 | 9409  | -0.7958024 | 0.576023  | 2.97E-179 | Loss | Gain |
| Chr8_CNVR_35  | Chr8 | 105261801 | 105271993 | 10193 | -0.9301271 | 0.524812  | 9.06E-253 | Loss | Gain |

|              |      |           |           |       |            |          |           |      |      |
|--------------|------|-----------|-----------|-------|------------|----------|-----------|------|------|
| Chr8_CNVR_36 | Chr8 | 110998329 | 111006169 | 7841  | -1.290857  | 0.408708 | 0         | Loss | Gain |
| Chr8_CNVR_37 | Chr8 | 112999097 | 113010857 | 11761 | -0.8679724 | 0.547916 | 2.17E-259 | Loss | Gain |
| Chr8_CNVR_38 | Chr8 | 113033593 | 113044569 | 10977 | -0.8422149 | 0.557787 | 3.82E-230 | Loss | Gain |
| Chr9_CNVR_5  | Chr9 | 422       | 11367     | 10946 | -1.032168  | 0.488975 | 2.56E-301 | Loss | Gain |
| Chr9_CNVR_6  | Chr9 | 42029694  | 42042323  | 12630 | -1.710352  | 0.305586 | 0         | Loss | Gain |
| Chr9_CNVR_1  | Chr9 | 48624238  | 48633499  | 9262  | 0.9385995  | 1.91667  | 9.07E-227 | Gain | Loss |
| Chr9_CNVR_2  | Chr9 | 55697038  | 55705457  | 8420  | 0.949645   | 1.9314   | 1.80E-210 | Gain | Loss |
| Chr9_CNVR_3  | Chr9 | 56012788  | 56027101  | 14314 | 1.356452   | 2.56055  | 0         | Gain | Loss |
| Chr9_CNVR_7  | Chr9 | 79748768  | 79760555  | 11788 | -1.037646  | 0.487122 | 0         | Loss | Gain |
| Chr9_CNVR_4  | Chr9 | 88307698  | 88324537  | 16840 | 1.017606   | 2.02456  | 0         | Gain | Loss |
| Chr9_CNVR_8  | Chr9 | 96037258  | 96045677  | 8420  | -0.7809967 | 0.581965 | 3.23E-145 | Loss | Gain |
| Chr9_CNVR_9  | Chr9 | 97695156  | 97706101  | 10946 | -0.8533063 | 0.553515 | 2.40E-219 | Loss | Gain |
| Chr9_CNVR_10 | Chr9 | 103139528 | 103149631 | 10104 | -0.8738598 | 0.545685 | 4.88E-211 | Loss | Gain |
| Chr9_CNVR_11 | Chr9 | 103515060 | 103528531 | 13472 | -0.8595145 | 0.551138 | 7.64E-273 | Loss | Gain |
| Chr9_CNVR_12 | Chr9 | 103544530 | 103558001 | 13472 | -0.87015   | 0.54709  | 1.21E-278 | Loss | Gain |
| Chr9_CNVR_13 | Chr9 | 103614416 | 103622835 | 8420  | -0.8727423 | 0.546108 | 7.91E-176 | Loss | Gain |
| Chr9_CNVR_14 | Chr9 | 103623678 | 103637991 | 14314 | -0.9148877 | 0.530385 | 0         | Loss | Gain |
| Chr9_CNVR_15 | Chr9 | 103721350 | 103739031 | 17682 | -0.9577819 | 0.514848 | 0         | Loss | Gain |
| Chr9_CNVR_16 | Chr9 | 103747452 | 103756713 | 9262  | -0.8889754 | 0.539997 | 2.42E-199 | Loss | Gain |
| Chr9_CNVR_17 | Chr9 | 103936902 | 103950373 | 13472 | -0.8718954 | 0.546428 | 1.34E-279 | Loss | Gain |
| Chr9_CNVR_18 | Chr9 | 103953742 | 103971423 | 17682 | -0.9738691 | 0.509139 | 0         | Loss | Gain |
| Chr9_CNVR_19 | Chr9 | 104057308 | 104099407 | 42100 | -0.9293687 | 0.525088 | 0         | Loss | Gain |
| Chr9_CNVR_20 | Chr9 | 104106986 | 104125509 | 18524 | -0.9676093 | 0.511353 | 0         | Loss | Gain |
| Chr9_CNVR_21 | Chr9 | 104141508 | 104150769 | 9262  | -0.901639  | 0.535278 | 3.65E-204 | Loss | Gain |
| Chr9_CNVR_22 | Chr9 | 104244232 | 104256861 | 12630 | -0.8944198 | 0.537964 | 7.00E-274 | Loss | Gain |
| Chr9_CNVR_23 | Chr9 | 104340220 | 104350323 | 10104 | -0.8326101 | 0.561512 | 2.87E-194 | Loss | Gain |
| Chr9_CNVR_24 | Chr9 | 104375584 | 104385687 | 10104 | -0.8686882 | 0.547645 | 6.48E-209 | Loss | Gain |
| Chr9_CNVR_25 | Chr9 | 105238634 | 105247895 | 9262  | -0.9287821 | 0.525302 | 1.36E-214 | Loss | Gain |
| ChrX_CNVR_10 | ChrX | 39168644  | 39200522  | 31879 | -1.197767  | 0.43595  | 0         | Loss | Gain |
| ChrX_CNVR_11 | ChrX | 39209216  | 39233848  | 24633 | -1.010648  | 0.496323 | 0         | Loss | Gain |
| ChrX_CNVR_12 | ChrX | 39242544  | 39258482  | 15939 | -1.020373  | 0.492989 | 5.94E-250 | Loss | Gain |
| ChrX_CNVR_13 | ChrX | 39286014  | 39304850  | 18837 | -1.822077  | 0.282814 | 0         | Loss | Gain |
| ChrX_CNVR_14 | ChrX | 39309198  | 39325136  | 15939 | -1.215155  | 0.430727 | 0         | Loss | Gain |
| ChrX_CNVR_1  | ChrX | 43007046  | 43105576  | 98531 | 4.459977   | 22.0083  | 0         | Gain | Loss |
| ChrX_CNVR_2  | ChrX | 44309696  | 44385044  | 75349 | 1.322158   | 2.5004   | 0         | Gain | Loss |
| ChrX_CNVR_3  | ChrX | 48035076  | 48053912  | 18837 | 0.8536857  | 1.80711  | 3.33E-231 | Gain | Loss |
| ChrX_CNVR_4  | ChrX | 94758080  | 94801550  | 43471 | 2.288026   | 4.88387  | 0         | Gain | Loss |
| ChrX_CNVR_15 | ChrX | 95175392  | 95194228  | 18837 | -1.096336  | 0.467703 | 0         | Loss | Gain |
| ChrX_CNVR_5  | ChrX | 118705704 | 118753520 | 47817 | 1.112605   | 2.16236  | 0         | Gain | Loss |
| ChrX_CNVR_6  | ChrX | 119065056 | 119088238 | 23183 | 1.804237   | 3.49244  | 0         | Gain | Loss |
| ChrX_CNVR_7  | ChrX | 119137506 | 119163586 | 26081 | 1.209407   | 2.31243  | 0         | Gain | Loss |
| ChrX_CNVR_8  | ChrX | 119218650 | 119234588 | 15939 | 1.838415   | 3.57617  | 0         | Gain | Loss |
| ChrX_CNVR_9  | ChrX | 119498306 | 119546122 | 47817 | 1.168529   | 2.24782  | 0         | Gain | Loss |
| ChrX_CNVR_16 | ChrX | 147140880 | 147155368 | 14489 | -1.345295  | 0.393574 | 0         | Loss | Gain |
