# Supplementary material for: Whole-Genome Analyses of Korean Native and Holstein Cattle Breeds by Massively Parallel Sequencing
Source: PubMed Central journal article supplement (PMC4081042; doi:10.1371/journal.pone.0101127), 2014-07-03
Supplement: pone.0101127.s005.pdf [file pone.0101127.s005.pdf]

**Supplementary Table S2. CNVRs detected from JJHvsHOL**

| cnv_name      | chr   | start     | end       | size  | log2       | Ratio    | pvalue    | Jeju Heugu | Holstein |
|---------------|-------|-----------|-----------|-------|------------|----------|-----------|------------|----------|
| Chr1_CNVR_1   | Chr1  | 12913071  | 12925837  | 12767 | 1.080364   | 2.11457  | 0         | Gain       | Loss     |
| Chr1_CNVR_9   | Chr1  | 12926589  | 12939355  | 12767 | -2.872997  | 0.136503 | 0         | Loss       | Gain     |
| Chr1_CNVR_10  | Chr1  | 15060931  | 15068439  | 7509  | -2.535501  | 0.17248  | 0         | Loss       | Gain     |
| Chr1_CNVR_2   | Chr1  | 24985395  | 24997411  | 12017 | 1.043944   | 2.06186  | 0         | Gain       | Loss     |
| Chr1_CNVR_11  | Chr1  | 26475379  | 26506921  | 31543 | -1.058565  | 0.480109 | 0         | Loss       | Gain     |
| Chr1_CNVR_12  | Chr1  | 32135667  | 32143927  | 8261  | -0.8536478 | 0.553384 | 2.75E-189 | Loss       | Gain     |
| Chr1_CNVR_13  | Chr1  | 42133729  | 42146495  | 12767 | -1.376998  | 0.385019 | 0         | Loss       | Gain     |
| Chr1_CNVR_14  | Chr1  | 42154007  | 42161515  | 7509  | -0.9686215 | 0.510994 | 1.40E-213 | Loss       | Gain     |
| Chr1_CNVR_15  | Chr1  | 42181043  | 42191555  | 10513 | -0.886669  | 0.540861 | 1.30E-256 | Loss       | Gain     |
| Chr1_CNVR_16  | Chr1  | 42253139  | 42263651  | 10513 | -0.9791619 | 0.507274 | 1.32E-303 | Loss       | Gain     |
| Chr1_CNVR_3   | Chr1  | 46184623  | 46192883  | 8261  | 1.998253   | 3.99516  | 0         | Gain       | Loss     |
| Chr1_CNVR_4   | Chr1  | 76009837  | 76018097  | 8261  | 1.105316   | 2.15146  | 8.43E-286 | Gain       | Loss     |
| Chr1_CNVR_5   | Chr1  | 93010975  | 93022239  | 11265 | 1.841483   | 3.58378  | 0         | Gain       | Loss     |
| Chr1_CNVR_17  | Chr1  | 97519979  | 97544761  | 24783 | -1.05456   | 0.481444 | 0         | Loss       | Gain     |
| Chr1_CNVR_6   | Chr1  | 104071703 | 104082967 | 11265 | 2.571398   | 5.94385  | 0         | Gain       | Loss     |
| Chr1_CNVR_7   | Chr1  | 118624581 | 118635845 | 11265 | 0.990464   | 1.98682  | 0         | Gain       | Loss     |
| Chr1_CNVR_18  | Chr1  | 120969955 | 120986475 | 16521 | -1.115061  | 0.461672 | 0         | Loss       | Gain     |
| Chr1_CNVR_8   | Chr1  | 124142179 | 124151189 | 9011  | 4.657252   | 25.2332  | 0         | Gain       | Loss     |
| Chr1_CNVR_19  | Chr1  | 134334751 | 134342259 | 7509  | -0.8821252 | 0.542568 | 2.77E-182 | Loss       | Gain     |
| Chr13_CNVR_1  | Chr13 | 239650    | 263271    | 23622 | 2.405698   | 5.29892  | 0         | Gain       | Loss     |
| Chr13_CNVR_2  | Chr13 | 875920    | 885825    | 9906  | 1.199867   | 2.29718  | 0         | Gain       | Loss     |
| Chr13_CNVR_3  | Chr13 | 6369178   | 6376797   | 7620  | 3.856283   | 14.4829  | 0         | Gain       | Loss     |
| Chr13_CNVR_4  | Chr13 | 10997566  | 11007471  | 9906  | 1.400666   | 2.64023  | 0         | Gain       | Loss     |
| Chr13_CNVR_5  | Chr13 | 11010520  | 11034903  | 24384 | 1.01961    | 2.02737  | 0         | Gain       | Loss     |
| Chr13_CNVR_6  | Chr13 | 11066146  | 11081385  | 15240 | 1.113259   | 2.16334  | 0         | Gain       | Loss     |
| Chr13_CNVR_7  | Chr13 | 11092054  | 11101197  | 9144  | 1.526158   | 2.88018  | 0         | Gain       | Loss     |
| Chr13_CNVR_8  | Chr13 | 11106532  | 11117961  | 11430 | 1.109101   | 2.15711  | 0         | Gain       | Loss     |
| Chr13_CNVR_9  | Chr13 | 11119486  | 11137773  | 18288 | 1.047088   | 2.06635  | 0         | Gain       | Loss     |
| Chr13_CNVR_10 | Chr13 | 11340466  | 11364087  | 23622 | 1.121457   | 2.17567  | 0         | Gain       | Loss     |
| Chr13_CNVR_11 | Chr13 | 11372470  | 11384661  | 12192 | 0.9564194  | 1.94049  | 0         | Gain       | Loss     |
| Chr13_CNVR_12 | Chr13 | 11438764  | 11450193  | 11430 | 1.06985    | 2.09922  | 0         | Gain       | Loss     |
| Chr13_CNVR_13 | Chr13 | 11483722  | 11502009  | 18288 | 0.9600781  | 1.94542  | 0         | Gain       | Loss     |
| Chr13_CNVR_14 | Chr13 | 17829658  | 17844135  | 14478 | 0.99626    | 1.99482  | 0         | Gain       | Loss     |
| Chr13_CNVR_15 | Chr13 | 17844898  | 17863185  | 18288 | 1.026274   | 2.03676  | 0         | Gain       | Loss     |
| Chr13_CNVR_16 | Chr13 | 53856256  | 53863875  | 7620  | 0.9811437  | 1.97403  | 7.39E-220 | Gain       | Loss     |
| Chr13_CNVR_17 | Chr13 | 53934742  | 53962935  | 28194 | -1.060212  | 0.479562 | 0         | Loss       | Gain     |
| Chr13_CNVR_18 | Chr13 | 53963698  | 53977413  | 13716 | -0.9287517 | 0.525313 | 0         | Loss       | Gain     |
| Chr13_CNVR_19 | Chr13 | 63029212  | 63065787  | 36576 | -1.444966  | 0.367301 | 0         | Loss       | Gain     |
| Chr14_CNVR_7  | Chr14 | 2731688   | 2741796   | 10109 | -1.446607  | 0.366883 | 0         | Loss       | Gain     |
| Chr14_CNVR_8  | Chr14 | 14495956  | 14507508  | 11553 | -1.083561  | 0.471863 | 0         | Loss       | Gain     |
| Chr14_CNVR_9  | Chr14 | 14534944  | 14545052  | 10109 | -0.9789239 | 0.507358 | 4.03E-298 | Loss       | Gain     |
| Chr14_CNVR_10 | Chr14 | 14545774  | 14557326  | 11553 | -1.031078  | 0.489344 | 0         | Loss       | Gain     |
| Chr14_CNVR_11 | Chr14 | 14563824  | 14573932  | 10109 | -0.9161013 | 0.529939 | 9.27E-267 | Loss       | Gain     |
| Chr14_CNVR_12 | Chr14 | 14574654  | 14599202  | 24549 | -1.141677  | 0.453232 | 0         | Loss       | Gain     |
| Chr14_CNVR_13 | Chr14 | 14600646  | 14619418  | 18773 | -2.237362  | 0.212074 | 0         | Loss       | Gain     |
| Chr14_CNVR_14 | Chr14 | 14620140  | 14641078  | 20939 | -0.9709451 | 0.510172 | 0         | Loss       | Gain     |
| Chr14_CNVR_15 | Chr14 | 14649020  | 14677900  | 28881 | -1.24021   | 0.423311 | 0         | Loss       | Gain     |
| Chr14_CNVR_16 | Chr14 | 14678622  | 14690174  | 11553 | -1.06416   | 0.478251 | 0         | Loss       | Gain     |
| Chr14_CNVR_17 | Chr14 | 14695228  | 14711112  | 15885 | -1.197863  | 0.435921 | 0         | Loss       | Gain     |
| Chr14_CNVR_18 | Chr14 | 14724830  | 14747934  | 23105 | -1.072533  | 0.475483 | 0         | Loss       | Gain     |
| Chr14_CNVR_19 | Chr14 | 14750822  | 14764540  | 13719 | -1.100218  | 0.466446 | 0         | Loss       | Gain     |
| Chr14_CNVR_20 | Chr14 | 14765984  | 14801362  | 35379 | -1.060632  | 0.479422 | 0         | Loss       | Gain     |

|               |       |          |          |       |            |           |           |      |      |
|---------------|-------|----------|----------|-------|------------|-----------|-----------|------|------|
| Chr14_CNVR_21 | Chr14 | 14804250 | 14845404 | 41155 | -1.054382  | 0.481503  | 0         | Loss | Gain |
| Chr14_CNVR_22 | Chr14 | 14846126 | 14860566 | 14441 | -1.136499  | 0.454862  | 0         | Loss | Gain |
| Chr14_CNVR_23 | Chr14 | 14870674 | 14887280 | 16607 | -1.555593  | 0.340189  | 0         | Loss | Gain |
| Chr14_CNVR_24 | Chr14 | 14890890 | 14942152 | 51263 | -1.969719  | 0.255303  | 0         | Loss | Gain |
| Chr14_CNVR_25 | Chr14 | 15014352 | 15030958 | 16607 | -1.278072  | 0.412346  | 0         | Loss | Gain |
| Chr14_CNVR_26 | Chr14 | 15040344 | 15049008 | 8665  | -1.521674  | 0.348282  | 0         | Loss | Gain |
| Chr14_CNVR_27 | Chr14 | 15079332 | 15114710 | 35379 | -1.291264  | 0.408593  | 0         | Loss | Gain |
| Chr14_CNVR_28 | Chr14 | 15116876 | 15186188 | 69313 | -1.20558   | 0.433595  | 0         | Loss | Gain |
| Chr14_CNVR_29 | Chr14 | 15290156 | 15308206 | 18051 | -1.080451  | 0.472881  | 0         | Loss | Gain |
| Chr14_CNVR_30 | Chr14 | 15308928 | 15381850 | 72923 | -1.310389  | 0.403212  | 0         | Loss | Gain |
| Chr14_CNVR_1  | Chr14 | 32270152 | 32293256 | 23105 | 2.415641   | 5.33556   | 0         | Gain | Loss |
| Chr14_CNVR_31 | Chr14 | 32536570 | 32545234 | 8665  | -4.804485  | 0.0357854 | 0         | Loss | Gain |
| Chr14_CNVR_2  | Chr14 | 32548844 | 32556064 | 7221  | 0.9689077  | 1.95736   | 2.34E-212 | Gain | Loss |
| Chr14_CNVR_3  | Chr14 | 32558230 | 32566894 | 8665  | 0.9931287  | 1.9905    | 4.43E-265 | Gain | Loss |
| Chr14_CNVR_4  | Chr14 | 44859666 | 44866886 | 7221  | 1.711766   | 3.27562   | 0         | Gain | Loss |
| Chr14_CNVR_5  | Chr14 | 49642194 | 49655190 | 12997 | 0.9808351  | 1.97361   | 0         | Gain | Loss |
| Chr14_CNVR_6  | Chr14 | 49657356 | 49667464 | 10109 | 0.9752733  | 1.96601   | 1.04E-299 | Gain | Loss |
| Chr14_CNVR_32 | Chr14 | 54821100 | 54828320 | 7221  | -0.9409195 | 0.520901  | 6.24E-200 | Loss | Gain |
| Chr15_CNVR_1  | Chr15 | 11375395 | 11390670 | 15276 | 1.144337   | 2.21045   | 0         | Gain | Loss |
| Chr15_CNVR_22 | Chr15 | 17743879 | 17755938 | 12060 | -4.65433   | 0.0397107 | 0         | Loss | Gain |
| Chr15_CNVR_2  | Chr15 | 31857295 | 31865334 | 8040  | 3.668969   | 12.7195   | 0         | Gain | Loss |
| Chr15_CNVR_3  | Chr15 | 46480447 | 46488486 | 8040  | 1.123909   | 2.17937   | 4.42E-268 | Gain | Loss |
| Chr15_CNVR_23 | Chr15 | 46553611 | 46564062 | 10452 | -3.39043   | 0.0953628 | 0         | Loss | Gain |
| Chr15_CNVR_24 | Chr15 | 46597831 | 46610694 | 12864 | -1.106843  | 0.464309  | 0         | Loss | Gain |
| Chr15_CNVR_25 | Chr15 | 46611499 | 46619538 | 8040  | -1.206148  | 0.433424  | 7.82E-299 | Loss | Gain |
| Chr15_CNVR_26 | Chr15 | 46623559 | 46632402 | 8844  | -0.9217167 | 0.527881  | 1.10E-212 | Loss | Gain |
| Chr15_CNVR_4  | Chr15 | 46827775 | 46837422 | 9648  | 1.00611    | 2.00849   | 1.19E-268 | Gain | Loss |
| Chr15_CNVR_5  | Chr15 | 46878427 | 46889682 | 11256 | 0.9611358  | 1.94684   | 3.67E-290 | Gain | Loss |
| Chr15_CNVR_6  | Chr15 | 46896115 | 46908174 | 12060 | 1.111922   | 2.16133   | 0         | Gain | Loss |
| Chr15_CNVR_27 | Chr15 | 46944355 | 46952394 | 8040  | -3.980873  | 0.0633341 | 0         | Loss | Gain |
| Chr15_CNVR_7  | Chr15 | 49091035 | 49110330 | 19296 | 1.025985   | 2.03635   | 0         | Gain | Loss |
| Chr15_CNVR_8  | Chr15 | 49115155 | 49128822 | 13668 | 0.9879582  | 1.98338   | 0         | Gain | Loss |
| Chr15_CNVR_28 | Chr15 | 49569415 | 49579062 | 9648  | -1.049194  | 0.483238  | 2.25E-287 | Loss | Gain |
| Chr15_CNVR_29 | Chr15 | 49871719 | 49880562 | 8844  | -0.8625846 | 0.549966  | 5.96E-190 | Loss | Gain |
| Chr15_CNVR_30 | Chr15 | 49912723 | 49921566 | 8844  | -0.8431652 | 0.557419  | 1.23E-182 | Loss | Gain |
| Chr15_CNVR_31 | Chr15 | 49944883 | 49956138 | 11256 | -1.034818  | 0.488077  | 0         | Loss | Gain |
| Chr15_CNVR_32 | Chr15 | 50719939 | 50754510 | 34572 | -4.933456  | 0.0327252 | 0         | Loss | Gain |
| Chr15_CNVR_33 | Chr15 | 50787475 | 50808378 | 20904 | -2.042892  | 0.242677  | 0         | Loss | Gain |
| Chr15_CNVR_9  | Chr15 | 50814811 | 50827674 | 12864 | 1.036213   | 2.05084   | 0         | Gain | Loss |
| Chr15_CNVR_34 | Chr15 | 50831695 | 50844558 | 12864 | -2.467536  | 0.1808    | 0         | Loss | Gain |
| Chr15_CNVR_10 | Chr15 | 51084955 | 51105054 | 20100 | 3.362279   | 10.2836   | 0         | Gain | Loss |
| Chr15_CNVR_35 | Chr15 | 51730567 | 51745842 | 15276 | -0.9722381 | 0.509715  | 0         | Loss | Gain |
| Chr15_CNVR_36 | Chr15 | 52218595 | 52227438 | 8844  | -1.152282  | 0.449913  | 4.62E-306 | Loss | Gain |
| Chr15_CNVR_37 | Chr15 | 52229047 | 52241910 | 12864 | -1.147683  | 0.45135   | 0         | Loss | Gain |
| Chr15_CNVR_38 | Chr15 | 52263619 | 52282914 | 19296 | -2.67764   | 0.156297  | 0         | Loss | Gain |
| Chr15_CNVR_11 | Chr15 | 64543915 | 64564818 | 20904 | 1.181043   | 2.26741   | 0         | Gain | Loss |
| Chr15_CNVR_12 | Chr15 | 69969307 | 69977346 | 8040  | 1.437695   | 2.70888   | 0         | Gain | Loss |
| Chr15_CNVR_39 | Chr15 | 78331711 | 78341358 | 9648  | -3.861302  | 0.0688069 | 0         | Loss | Gain |
| Chr15_CNVR_13 | Chr15 | 79531279 | 79542534 | 11256 | 3.113712   | 8.65607   | 0         | Gain | Loss |
| Chr15_CNVR_14 | Chr15 | 79606051 | 79618110 | 12060 | 1.685117   | 3.21566   | 0         | Gain | Loss |
| Chr15_CNVR_15 | Chr15 | 79815895 | 79833582 | 17688 | 1.066921   | 2.09496   | 0         | Gain | Loss |
| Chr15_CNVR_40 | Chr15 | 80789539 | 80799186 | 9648  | -0.9366617 | 0.52244   | 3.31E-238 | Loss | Gain |
| Chr15_CNVR_16 | Chr15 | 80812051 | 80842602 | 30552 | 1.227219   | 2.34115   | 0         | Gain | Loss |
| Chr15_CNVR_17 | Chr15 | 80996167 | 81028326 | 32160 | 1.270793   | 2.41294   | 0         | Gain | Loss |
| Chr15_CNVR_18 | Chr15 | 81036367 | 81054054 | 17688 | 0.9863841  | 1.98121   | 0         | Gain | Loss |
| Chr15_CNVR_19 | Chr15 | 81054859 | 81075762 | 20904 | 1.043392   | 2.06107   | 0         | Gain | Loss |

|               |       |          |          |       |            |           |           |      |      |
|---------------|-------|----------|----------|-------|------------|-----------|-----------|------|------|
| Chr15_CNVR_20 | Chr15 | 81078175 | 81086214 | 8040  | 1.11673    | 2.16855   | 2.23E-265 | Gain | Loss |
| Chr15_CNVR_21 | Chr15 | 81300079 | 81308922 | 8844  | 1.050828   | 2.07172   | 1.37E-264 | Gain | Loss |
| Chr15_CNVR_41 | Chr15 | 81870115 | 81907902 | 37788 | -2.438196  | 0.184514  | 0         | Loss | Gain |
| Chr15_CNVR_42 | Chr15 | 81908707 | 81928002 | 19296 | -1.45873   | 0.363813  | 0         | Loss | Gain |
| Chr15_CNVR_43 | Chr15 | 83368771 | 83377614 | 8844  | -3.015878  | 0.123632  | 0         | Loss | Gain |
| Chr16_CNVR_1  | Chr16 | 3502     | 16727    | 13226 | 1.79793    | 3.47721   | 0         | Gain | Loss |
| Chr16_CNVR_8  | Chr16 | 5584874  | 5592653  | 7780  | -0.8375179 | 0.559606  | 3.18E-164 | Loss | Gain |
| Chr16_CNVR_9  | Chr16 | 5620662  | 5632331  | 11670 | -1.020597  | 0.492912  | 0         | Loss | Gain |
| Chr16_CNVR_10 | Chr16 | 5633110  | 5643223  | 10114 | -1.054761  | 0.481377  | 0         | Loss | Gain |
| Chr16_CNVR_11 | Chr16 | 5644780  | 5652559  | 7780  | -0.9511125 | 0.517233  | 6.16E-204 | Loss | Gain |
| Chr16_CNVR_12 | Chr16 | 5681346  | 5689903  | 8558  | -0.8276725 | 0.563438  | 8.87E-177 | Loss | Gain |
| Chr16_CNVR_13 | Chr16 | 5702352  | 5724135  | 21784 | -0.9868274 | 0.504586  | 0         | Loss | Gain |
| Chr16_CNVR_14 | Chr16 | 5728804  | 5738917  | 10114 | -0.928343  | 0.525462  | 6.50E-254 | Loss | Gain |
| Chr16_CNVR_15 | Chr16 | 5739696  | 5761479  | 21784 | -1.077629  | 0.473807  | 0         | Loss | Gain |
| Chr16_CNVR_16 | Chr16 | 5762258  | 5773149  | 10892 | -0.9210069 | 0.52814   | 1.23E-269 | Loss | Gain |
| Chr16_CNVR_2  | Chr16 | 7408506  | 7419397  | 10892 | 0.8977255  | 1.86313   | 2.54E-258 | Gain | Loss |
| Chr16_CNVR_3  | Chr16 | 8578618  | 8587175  | 8558  | 1.118221   | 2.17079   | 4.79E-292 | Gain | Loss |
| Chr16_CNVR_4  | Chr16 | 8601180  | 8638523  | 37344 | 1.065145   | 2.09238   | 0         | Gain | Loss |
| Chr16_CNVR_5  | Chr16 | 11524904 | 11533461 | 8558  | 3.986269   | 15.8484   | 0         | Gain | Loss |
| Chr16_CNVR_6  | Chr16 | 39448880 | 39476887 | 28008 | 3.098251   | 8.5638    | 0         | Gain | Loss |
| Chr16_CNVR_7  | Chr16 | 81517674 | 81526231 | 8558  | 1.069123   | 2.09816   | 7.89E-272 | Gain | Loss |
| Chr17_CNVR_1  | Chr17 | 15322753 | 15331969 | 9217  | 2.416955   | 5.34043   | 0         | Gain | Loss |
| Chr17_CNVR_2  | Chr17 | 21083521 | 21096577 | 13057 | 5.45096    | 43.7424   | 0         | Gain | Loss |
| Chr17_CNVR_3  | Chr17 | 21913729 | 21921409 | 7681  | 1.196942   | 2.29253   | 2.58E-295 | Gain | Loss |
| Chr17_CNVR_4  | Chr17 | 28278913 | 28287361 | 8449  | 1.646983   | 3.13178   | 0         | Gain | Loss |
| Chr17_CNVR_5  | Chr17 | 52439425 | 52450177 | 10753 | 5.490304   | 44.9517   | 0         | Gain | Loss |
| Chr17_CNVR_6  | Chr17 | 52468609 | 52480129 | 11521 | 3.013605   | 8.0758    | 0         | Gain | Loss |
| Chr17_CNVR_7  | Chr17 | 70111873 | 70120321 | 8449  | 1.021808   | 2.03046   | 1.96E-252 | Gain | Loss |
| Chr17_CNVR_8  | Chr17 | 72879745 | 72888961 | 9217  | -0.9730686 | 0.509421  | 1.27E-253 | Loss | Gain |
| Chr17_CNVR_9  | Chr17 | 72895873 | 72906625 | 10753 | -1.156036  | 0.448744  | 0         | Loss | Gain |
| Chr17_CNVR_10 | Chr17 | 72911233 | 72925057 | 13825 | -0.8610917 | 0.550536  | 0         | Loss | Gain |
| Chr17_CNVR_11 | Chr17 | 72925825 | 72938881 | 13057 | -2.44287   | 0.183917  | 0         | Loss | Gain |
| Chr17_CNVR_12 | Chr17 | 75136129 | 75146881 | 10753 | -2.077406  | 0.23694   | 0         | Loss | Gain |
| Chr18_CNVR_1  | Chr18 | 669145   | 678552   | 9408  | 1.358974   | 2.56503   | 0         | Gain | Loss |
| Chr18_CNVR_8  | Chr18 | 57636153 | 57650264 | 14112 | -2.007736  | 0.248663  | 0         | Loss | Gain |
| Chr18_CNVR_2  | Chr18 | 58473465 | 58486008 | 12544 | 1.056953   | 2.08053   | 0         | Gain | Loss |
| Chr18_CNVR_3  | Chr18 | 58569897 | 58580872 | 10976 | 1.196516   | 2.29186   | 0         | Gain | Loss |
| Chr18_CNVR_4  | Chr18 | 61447961 | 61463640 | 15680 | 5.820073   | 56.4959   | 0         | Gain | Loss |
| Chr18_CNVR_9  | Chr18 | 61661209 | 61679240 | 18032 | -3.764001  | 0.0736076 | 0         | Loss | Gain |
| Chr18_CNVR_5  | Chr18 | 61680025 | 61689432 | 9408  | 0.9947895  | 1.99279   | 2.06E-271 | Gain | Loss |
| Chr18_CNVR_6  | Chr18 | 61757641 | 61770968 | 13328 | 3.495898   | 11.2816   | 0         | Gain | Loss |
| Chr18_CNVR_7  | Chr18 | 63207257 | 63216664 | 9408  | 1.925407   | 3.79844   | 0         | Gain | Loss |
| Chr18_CNVR_10 | Chr18 | 63255865 | 63266056 | 10192 | -1.384692  | 0.382971  | 0         | Loss | Gain |
| Chr18_CNVR_11 | Chr18 | 63317017 | 63327208 | 10192 | -1.937784  | 0.261017  | 0         | Loss | Gain |
| Chr18_CNVR_12 | Chr18 | 63527129 | 63571816 | 44688 | -1.462397  | 0.36289   | 0         | Loss | Gain |
| Chr18_CNVR_13 | Chr18 | 63791337 | 63805448 | 14112 | -1.133148  | 0.45592   | 0         | Loss | Gain |
| Chr19_CNVR_1  | Chr19 | 1867363  | 1875113  | 7751  | 1.187083   | 2.27692   | 2.34E-300 | Gain | Loss |
| Chr19_CNVR_2  | Chr19 | 19796213 | 19851237 | 55025 | 1.638088   | 3.11253   | 0         | Gain | Loss |
| Chr19_CNVR_3  | Chr19 | 19857439 | 19899287 | 41849 | 2.179538   | 4.53008   | 0         | Gain | Loss |
| Chr19_CNVR_4  | Chr19 | 19902389 | 19952763 | 50375 | 1.616617   | 3.06655   | 0         | Gain | Loss |
| Chr19_CNVR_8  | Chr19 | 24206739 | 24215263 | 8525  | -1.299268  | 0.406332  | 0         | Loss | Gain |
| Chr19_CNVR_5  | Chr19 | 24621363 | 24633763 | 12401 | 1.008119   | 2.01129   | 0         | Gain | Loss |
| Chr19_CNVR_6  | Chr19 | 51058939 | 51067463 | 8525  | 1.062842   | 2.08904   | 7.20E-277 | Gain | Loss |
| Chr19_CNVR_7  | Chr19 | 57488339 | 57499187 | 10849 | 0.9214919  | 1.89407   | 3.16E-277 | Gain | Loss |
| Chr2_CNVR_1   | Chr2  | 57407997 | 57416884 | 8888  | 1.097461   | 2.13978   | 1.54E-282 | Gain | Loss |
| Chr2_CNVR_2   | Chr2  | 68404877 | 68416996 | 12120 | 3.232497   | 9.39893   | 0         | Gain | Loss |

|               |       |           |           |       |            |            |           |      |      |
|---------------|-------|-----------|-----------|-------|------------|------------|-----------|------|------|
| Chr2_CNVR_3   | Chr2  | 68451741  | 68460628  | 8888  | 2.526267   | 5.76079    | 0         | Gain | Loss |
| Chr2_CNVR_11  | Chr2  | 82047149  | 82055228  | 8080  | -0.9085928 | 0.532704   | 1.62E-191 | Loss | Gain |
| Chr2_CNVR_12  | Chr2  | 83461149  | 83471652  | 10504 | -4.140604  | 0.0566962  | 0         | Loss | Gain |
| Chr2_CNVR_4   | Chr2  | 124181925 | 124208588 | 26664 | 0.91149    | 1.88099    | 0         | Gain | Loss |
| Chr2_CNVR_5   | Chr2  | 124329789 | 124342716 | 12928 | 0.9365767  | 1.91398    | 0         | Gain | Loss |
| Chr2_CNVR_6   | Chr2  | 124343525 | 124355644 | 12120 | 1.030866   | 2.04325    | 0         | Gain | Loss |
| Chr2_CNVR_7   | Chr2  | 124363725 | 124373420 | 9696  | 0.9710943  | 1.96033    | 1.78E-252 | Gain | Loss |
| Chr2_CNVR_8   | Chr2  | 124389581 | 124400084 | 10504 | 0.9391009  | 1.91733    | 1.80E-258 | Gain | Loss |
| Chr2_CNVR_13  | Chr2  | 133284853 | 133296164 | 11312 | -1.174817  | 0.44294    | 0         | Loss | Gain |
| Chr2_CNVR_14  | Chr2  | 136971757 | 136983068 | 11312 | -2.100297  | 0.23321    | 0         | Loss | Gain |
| Chr2_CNVR_9   | Chr2  | 137001653 | 137016196 | 14544 | 3.056325   | 8.31851    | 0         | Gain | Loss |
| Chr2_CNVR_15  | Chr2  | 137031549 | 137042860 | 11312 | -1.394807  | 0.380296   | 0         | Loss | Gain |
| Chr2_CNVR_10  | Chr2  | 137043669 | 137057404 | 13736 | 2.643075   | 6.24662    | 0         | Gain | Loss |
| Chr20_CNVR_1  | Chr20 | 72030206  | 72038265  | 8060  | 1.048121   | 2.06783    | 3.78E-239 | Gain | Loss |
| Chr21_CNVR_3  | Chr21 | 952106    | 969815    | 17710 | -1.455812  | 0.36455    | 0         | Loss | Gain |
| Chr21_CNVR_4  | Chr21 | 1605836   | 1626625   | 20790 | -2.267316  | 0.207716   | 0         | Loss | Gain |
| Chr21_CNVR_5  | Chr21 | 1627396   | 1638175   | 10780 | -1.875796  | 0.272477   | 0         | Loss | Gain |
| Chr21_CNVR_6  | Chr21 | 1771386   | 1779855   | 8470  | -2.179627  | 0.220733   | 0         | Loss | Gain |
| Chr21_CNVR_7  | Chr21 | 9609216   | 9641555   | 32340 | -1.73975   | 0.299422   | 0         | Loss | Gain |
| Chr21_CNVR_8  | Chr21 | 20087376  | 20108935  | 21560 | -2.70831   | 0.153009   | 0         | Loss | Gain |
| Chr21_CNVR_9  | Chr21 | 20115096  | 20142045  | 26950 | -2.461191  | 0.181597   | 0         | Loss | Gain |
| Chr21_CNVR_10 | Chr21 | 20160526  | 20177465  | 16940 | -1.056557  | 0.480778   | 0         | Loss | Gain |
| Chr21_CNVR_11 | Chr21 | 20327616  | 20337625  | 10010 | -3.280783  | 0.102893   | 0         | Loss | Gain |
| Chr21_CNVR_12 | Chr21 | 52304176  | 52333435  | 29260 | -6.649154  | 0.00996335 | 0         | Loss | Gain |
| Chr21_CNVR_1  | Chr21 | 54928336  | 54939115  | 10780 | 1.09573    | 2.13721    | 0         | Gain | Loss |
| Chr21_CNVR_13 | Chr21 | 62490506  | 62498975  | 8470  | -1.07286   | 0.475376   | 9.43E-273 | Loss | Gain |
| Chr21_CNVR_2  | Chr21 | 70583206  | 70591675  | 8470  | 0.9508924  | 1.93307    | 2.99E-226 | Gain | Loss |
| Chr23_CNVR_6  | Chr23 | 7086731   | 7101911   | 15181 | -1.138929  | 0.454097   | 0         | Loss | Gain |
| Chr23_CNVR_1  | Chr23 | 25332695  | 25346277  | 13583 | 4.326091   | 20.0578    | 0         | Gain | Loss |
| Chr23_CNVR_2  | Chr23 | 25348675  | 25362257  | 13583 | 5.374742   | 41.4914    | 0         | Gain | Loss |
| Chr23_CNVR_7  | Chr23 | 25424581  | 25442957  | 18377 | -3.753756  | 0.0741322  | 0         | Loss | Gain |
| Chr23_CNVR_3  | Chr23 | 25458937  | 25466927  | 7991  | 2.933755   | 7.64097    | 0         | Gain | Loss |
| Chr23_CNVR_8  | Chr23 | 25705029  | 25713817  | 8789  | -1.224542  | 0.427933   | 0         | Loss | Gain |
| Chr23_CNVR_9  | Chr23 | 25748975  | 25758561  | 9587  | -3.351351  | 0.0979812  | 0         | Loss | Gain |
| Chr23_CNVR_10 | Chr23 | 25759361  | 25770547  | 11187 | -2.84822   | 0.138867   | 0         | Loss | Gain |
| Chr23_CNVR_11 | Chr23 | 25780135  | 25816089  | 35955 | -3.667312  | 0.0787098  | 0         | Loss | Gain |
| Chr23_CNVR_12 | Chr23 | 25824879  | 25838461  | 13583 | -1.646455  | 0.319424   | 0         | Loss | Gain |
| Chr23_CNVR_13 | Chr23 | 25844855  | 25857637  | 12783 | -3.466676  | 0.0904537  | 0         | Loss | Gain |
| Chr23_CNVR_14 | Chr23 | 25888799  | 25910371  | 21573 | -1.127869  | 0.457591   | 0         | Loss | Gain |
| Chr23_CNVR_15 | Chr23 | 26005453  | 26027025  | 21573 | -1.655067  | 0.317523   | 0         | Loss | Gain |
| Chr23_CNVR_16 | Chr23 | 26285903  | 26301881  | 15979 | -3.331025  | 0.0993714  | 0         | Loss | Gain |
| Chr23_CNVR_17 | Chr23 | 26319461  | 26348223  | 28763 | -3.495365  | 0.0886728  | 0         | Loss | Gain |
| Chr23_CNVR_18 | Chr23 | 26535191  | 26550371  | 15181 | -1.225058  | 0.42778    | 0         | Loss | Gain |
| Chr23_CNVR_19 | Chr23 | 27737685  | 27756061  | 18377 | -1.725542  | 0.302385   | 0         | Loss | Gain |
| Chr23_CNVR_20 | Chr23 | 27857535  | 27870319  | 12785 | -2.42798   | 0.185825   | 0         | Loss | Gain |
| Chr23_CNVR_21 | Chr23 | 28820331  | 28833913  | 13583 | -2.950463  | 0.129367   | 0         | Loss | Gain |
| Chr23_CNVR_22 | Chr23 | 28835511  | 28850691  | 15181 | -3.478106  | 0.0897399  | 0         | Loss | Gain |
| Chr23_CNVR_4  | Chr23 | 29007297  | 29022477  | 15181 | 0.9268325  | 1.9011     | 0         | Gain | Loss |
| Chr23_CNVR_23 | Chr23 | 29702427  | 29735983  | 33557 | -1.367512  | 0.387559   | 0         | Loss | Gain |
| Chr23_CNVR_24 | Chr23 | 29736783  | 29750365  | 13583 | -1.669645  | 0.314331   | 0         | Loss | Gain |
| Chr23_CNVR_5  | Chr23 | 29782327  | 29812687  | 30361 | 4.32654    | 20.064     | 0         | Gain | Loss |
| Chr24_CNVR_3  | Chr24 | 23602713  | 23611337  | 8625  | -2.039339  | 0.243275   | 0         | Loss | Gain |
| Chr24_CNVR_1  | Chr24 | 44178009  | 44194473  | 16465 | 3.486174   | 11.2058    | 0         | Gain | Loss |
| Chr24_CNVR_2  | Chr24 | 62404441  | 62427961  | 23521 | 1.479738   | 2.78898    | 0         | Gain | Loss |
| Chr26_CNVR_1  | Chr26 | 1941577   | 1967448   | 25872 | -4.102209  | 0.0582253  | 0         | Loss | Gain |
| Chr26_CNVR_2  | Chr26 | 31584617  | 31598728  | 14112 | -3.391722  | 0.0952774  | 0         | Loss | Gain |

|               |       |           |           |        |            |            |           |      |      |
|---------------|-------|-----------|-----------|--------|------------|------------|-----------|------|------|
| Chr28_CNVR_5  | Chr28 | 1805282   | 1812652   | 7371   | -4.102082  | 0.0582305  | 0         | Loss | Gain |
| Chr28_CNVR_1  | Chr28 | 2254116   | 2271066   | 16951  | 3.786404   | 13.7982    | 0         | Gain | Loss |
| Chr28_CNVR_2  | Chr28 | 3150308   | 3158414   | 8107   | 2.441519   | 5.43213    | 0         | Gain | Loss |
| Chr28_CNVR_3  | Chr28 | 6792562   | 6799930   | 7369   | 0.8072882  | 1.74992    | 3.96E-154 | Gain | Loss |
| Chr28_CNVR_4  | Chr28 | 11353118  | 11361224  | 8107   | 1.452258   | 2.73636    | 0         | Gain | Loss |
| Chr29_CNVR_10 | Chr29 | 5550931   | 5568751   | 17821  | -0.9169982 | 0.52961    | 0         | Loss | Gain |
| Chr29_CNVR_11 | Chr29 | 8559211   | 8571091   | 11881  | -0.9144123 | 0.53056    | 0         | Loss | Gain |
| Chr29_CNVR_12 | Chr29 | 21858871  | 21865471  | 6601   | -0.9011787 | 0.535449   | 7.51E-186 | Loss | Gain |
| Chr29_CNVR_13 | Chr29 | 21866791  | 21874051  | 7261   | -0.822298  | 0.56554    | 1.45E-174 | Loss | Gain |
| Chr29_CNVR_1  | Chr29 | 22119571  | 22131451  | 11881  | 1.076897   | 2.10949    | 0         | Gain | Loss |
| Chr29_CNVR_2  | Chr29 | 23940511  | 23954371  | 13861  | 1.002909   | 2.00404    | 0         | Gain | Loss |
| Chr29_CNVR_3  | Chr29 | 26954731  | 26966611  | 11881  | 3.596618   | 12.0973    | 0         | Gain | Loss |
| Chr29_CNVR_14 | Chr29 | 27168571  | 27175171  | 6601   | -5.256817  | 0.0261541  | 0         | Loss | Gain |
| Chr29_CNVR_15 | Chr29 | 27362611  | 27382411  | 19801  | -3.426376  | 0.0930161  | 0         | Loss | Gain |
| Chr29_CNVR_16 | Chr29 | 27390331  | 27414091  | 23761  | -5.063344  | 0.0299076  | 0         | Loss | Gain |
| Chr29_CNVR_17 | Chr29 | 27639151  | 27647731  | 8581   | -0.9261466 | 0.526262   | 2.31E-252 | Loss | Gain |
| Chr29_CNVR_18 | Chr29 | 27649051  | 27659611  | 10561  | -0.9429503 | 0.520168   | 0         | Loss | Gain |
| Chr29_CNVR_19 | Chr29 | 27734851  | 27744091  | 9241   | -1.106756  | 0.464337   | 0         | Loss | Gain |
| Chr29_CNVR_4  | Chr29 | 27762571  | 27769171  | 6601   | 2.761281   | 6.77998    | 0         | Gain | Loss |
| Chr29_CNVR_5  | Chr29 | 28026571  | 28039771  | 13201  | 1.747951   | 3.35881    | 0         | Gain | Loss |
| Chr29_CNVR_20 | Chr29 | 49910851  | 49918111  | 7261   | -0.9118571 | 0.5315     | 2.46E-208 | Loss | Gain |
| Chr29_CNVR_6  | Chr29 | 50246131  | 50253391  | 7261   | 0.9368792  | 1.91438    | 2.25E-222 | Gain | Loss |
| Chr29_CNVR_7  | Chr29 | 50352391  | 50359651  | 7261   | 1.043549   | 2.06129    | 4.90E-266 | Gain | Loss |
| Chr29_CNVR_8  | Chr29 | 50881711  | 50888311  | 6601   | 0.8066453  | 1.74914    | 2.25E-156 | Gain | Loss |
| Chr29_CNVR_9  | Chr29 | 51401131  | 51407731  | 6601   | 0.8912318  | 1.85476    | 7.18E-186 | Gain | Loss |
| Chr3_CNVR_1   | Chr3  | 8518304   | 8538986   | 20683  | 6.586098   | 96.0756    | 0         | Gain | Loss |
| Chr3_CNVR_2   | Chr3  | 8611756   | 8669972   | 58217  | 4.626146   | 24.695     | 0         | Gain | Loss |
| Chr3_CNVR_3   | Chr3  | 8732018   | 8751934   | 19917  | 6.697408   | 103.782    | 0         | Gain | Loss |
| Chr3_CNVR_8   | Chr3  | 47039678  | 47048104  | 8427   | -8.469147  | 0.00282184 | 0         | Loss | Gain |
| Chr3_CNVR_4   | Chr3  | 54766320  | 54799258  | 32939  | 2.327264   | 5.01853    | 0         | Gain | Loss |
| Chr3_CNVR_5   | Chr3  | 62696718  | 62711272  | 14555  | 1.05596    | 2.0791     | 0         | Gain | Loss |
| Chr3_CNVR_9   | Chr3  | 91037952  | 91047144  | 9193   | -1.165513  | 0.445806   | 0         | Loss | Gain |
| Chr3_CNVR_6   | Chr3  | 105709916 | 105725236 | 15321  | 0.9799279  | 1.97237    | 0         | Gain | Loss |
| Chr3_CNVR_7   | Chr3  | 119799720 | 119809678 | 9959   | 1.072006   | 2.10235    | 0         | Gain | Loss |
| Chr4_CNVR_1   | Chr4  | 1901      | 23941     | 22041  | 1.678213   | 3.20031    | 0         | Gain | Loss |
| Chr4_CNVR_2   | Chr4  | 24701     | 49781     | 25081  | 1.520857   | 2.86961    | 0         | Gain | Loss |
| Chr4_CNVR_3   | Chr4  | 54341     | 83221     | 28881  | 1.281727   | 2.4313     | 0         | Gain | Loss |
| Chr4_CNVR_4   | Chr4  | 84741     | 229141    | 144401 | 1.228818   | 2.34375    | 0         | Gain | Loss |
| Chr4_CNVR_5   | Chr4  | 2846581   | 2854181   | 7601   | 1.156496   | 2.22915    | 1.12E-278 | Gain | Loss |
| Chr4_CNVR_9   | Chr4  | 25537901  | 25546261  | 8361   | -1.813233  | 0.284553   | 0         | Loss | Gain |
| Chr4_CNVR_6   | Chr4  | 28241981  | 28254141  | 12161  | 4.238072   | 18.8706    | 0         | Gain | Loss |
| Chr4_CNVR_10  | Chr4  | 44618461  | 44628341  | 9881   | -1.058443  | 0.48015    | 0         | Loss | Gain |
| Chr4_CNVR_11  | Chr4  | 86733861  | 86745261  | 11401  | -4.795322  | 0.0360134  | 0         | Loss | Gain |
| Chr4_CNVR_12  | Chr4  | 95976221  | 95983821  | 7601   | -3.312301  | 0.10067    | 0         | Loss | Gain |
| Chr4_CNVR_7   | Chr4  | 99615861  | 99623461  | 7601   | 1.908553   | 3.75432    | 0         | Gain | Loss |
| Chr4_CNVR_13  | Chr4  | 106640541 | 106651941 | 11401  | -1.213927  | 0.431094   | 0         | Loss | Gain |
| Chr4_CNVR_14  | Chr4  | 106690701 | 106705901 | 15201  | -1.298412  | 0.406573   | 0         | Loss | Gain |
| Chr4_CNVR_15  | Chr4  | 106768221 | 106778861 | 10641  | -2.316769  | 0.200716   | 0         | Loss | Gain |
| Chr4_CNVR_16  | Chr4  | 106861701 | 106869301 | 7601   | -1.375021  | 0.385547   | 0         | Loss | Gain |
| Chr4_CNVR_8   | Chr4  | 109596181 | 109605301 | 9121   | 1.130522   | 2.18938    | 0         | Gain | Loss |
| Chr4_CNVR_17  | Chr4  | 119712541 | 119721661 | 9121   | -3.408245  | 0.0941924  | 0         | Loss | Gain |
| ChrX_CNVR_7   | ChrX  | 34742030  | 34771378  | 29349  | -1.483807  | 0.357544   | 0         | Loss | Gain |
| ChrX_CNVR_1   | ChrX  | 43007494  | 43104876  | 97383  | 4.55209    | 23.4593    | 0         | Gain | Loss |
| ChrX_CNVR_2   | ChrX  | 44310812  | 44384182  | 73371  | 1.154507   | 2.22608    | 0         | Gain | Loss |
| ChrX_CNVR_8   | ChrX  | 53878260  | 53898270  | 20011  | -2.889551  | 0.134946   | 0         | Loss | Gain |
| ChrX_CNVR_9   | ChrX  | 54062352  | 54127718  | 65367  | -1.184129  | 0.44009    | 0         | Loss | Gain |

|              |      |           |           |       |            |          |           |      |      |
|--------------|------|-----------|-----------|-------|------------|----------|-----------|------|------|
| ChrX_CNVR_3  | ChrX | 64062016  | 64078024  | 16009 | 0.9991386  | 1.99881  | 1.42E-264 | Gain | Loss |
| ChrX_CNVR_4  | ChrX | 64163400  | 64176740  | 13341 | 0.8389113  | 1.7887   | 1.66E-164 | Gain | Loss |
| ChrX_CNVR_10 | ChrX | 82480554  | 82499230  | 18677 | -2.732634  | 0.150451 | 0         | Loss | Gain |
| ChrX_CNVR_11 | ChrX | 92759024  | 92777700  | 18677 | -1.029417  | 0.489908 | 0         | Loss | Gain |
| ChrX_CNVR_5  | ChrX | 94758690  | 94801378  | 42689 | 2.563264   | 5.91043  | 0         | Gain | Loss |
| ChrX_CNVR_12 | ChrX | 95176232  | 95194908  | 18677 | -0.9378767 | 0.522001 | 3.45E-282 | Loss | Gain |
| ChrX_CNVR_6  | ChrX | 118681312 | 118694652 | 13341 | 1.090867   | 2.13002  | 1.55E-254 | Gain | Loss |
| ChrX_CNVR_13 | ChrX | 147142202 | 147155542 | 13341 | -1.238529  | 0.423805 | 0         | Loss | Gain |

---
