# Supplementary material for: Whole-Genome Analyses of Korean Native and Holstein Cattle Breeds by Massively Parallel Sequencing
Source: PubMed Central journal article supplement (PMC4081042; doi:10.1371/journal.pone.0101127), 2014-07-03
Supplement: pone.0101127.s006.pdf [file pone.0101127.s006.pdf]

**Supplementary Table S3. CNVRs detected from CHSVsHOL**

| <b>cnv_name</b> | <b>chr</b> | <b>start</b> | <b>end</b> | <b>size</b> | <b>log2</b> | <b>Ratio</b> | <b>pvalue</b> | <b>Chikso</b> | <b>Holstein</b> |
|-----------------|------------|--------------|------------|-------------|-------------|--------------|---------------|---------------|-----------------|
| Chr1_CNVR_16    | Chr1       | 2404591      | 2412581    | 7991        | -0.8912844  | 0.539134     | 4.01E-182     | Loss          | Gain            |
| Chr1_CNVR_17    | Chr1       | 2414179      | 2432555    | 18377       | -0.8198837  | 0.566488     | 0             | Loss          | Gain            |
| Chr1_CNVR_18    | Chr1       | 5237047      | 5246633    | 9587        | -1.214756   | 0.430846     | 0             | Loss          | Gain            |
| Chr1_CNVR_19    | Chr1       | 5249031      | 5257021    | 7991        | -1.133545   | 0.455794     | 2.55E-269     | Loss          | Gain            |
| Chr1_CNVR_20    | Chr1       | 5275399      | 5288181    | 12783       | -1.045921   | 0.484336     | 0             | Loss          | Gain            |
| Chr1_CNVR_21    | Chr1       | 6314897      | 6322887    | 7991        | -0.8893908  | 0.539842     | 1.80E-181     | Loss          | Gain            |
| Chr1_CNVR_1     | Chr1       | 12913039     | 12925823   | 12785       | 1.199741    | 2.29698      | 0             | Gain          | Loss            |
| Chr1_CNVR_22    | Chr1       | 12926623     | 12939405   | 12783       | -2.79276    | 0.14431      | 0             | Loss          | Gain            |
| Chr1_CNVR_2     | Chr1       | 24985929     | 24997913   | 11985       | 1.054119    | 2.07645      | 0             | Gain          | Loss            |
| Chr1_CNVR_3     | Chr1       | 32403047     | 32411035   | 7989        | 0.873487    | 1.83209      | 4.35E-183     | Gain          | Loss            |
| Chr1_CNVR_4     | Chr1       | 40436193     | 40445779   | 9587        | 0.8453385   | 1.79669      | 3.83E-207     | Gain          | Loss            |
| Chr1_CNVR_5     | Chr1       | 40474545     | 40483333   | 8789        | 0.9745514   | 1.96503      | 1.64E-242     | Gain          | Loss            |
| Chr1_CNVR_6     | Chr1       | 40506505     | 40517689   | 11185       | 0.8792383   | 1.8394       | 2.10E-258     | Gain          | Loss            |
| Chr1_CNVR_7     | Chr1       | 40524881     | 40536067   | 11187       | 0.9193762   | 1.8913       | 4.76E-279     | Gain          | Loss            |
| Chr1_CNVR_8     | Chr1       | 40581611     | 40593595   | 11985       | 1.10928     | 2.15738      | 0             | Gain          | Loss            |
| Chr1_CNVR_9     | Chr1       | 42273893     | 42281881   | 7989        | 1.099276    | 2.14247      | 5.15E-269     | Gain          | Loss            |
| Chr1_CNVR_23    | Chr1       | 57474069     | 57483655   | 9587        | -0.957673   | 0.514887     | 5.12E-246     | Loss          | Gain            |
| Chr1_CNVR_24    | Chr1       | 57647451     | 57659435   | 11985       | -1.119635   | 0.46021      | 0             | Loss          | Gain            |
| Chr1_CNVR_25    | Chr1       | 68314101     | 68325287   | 11187       | -0.9033481  | 0.534645     | 5.66E-260     | Loss          | Gain            |
| Chr1_CNVR_26    | Chr1       | 68343665     | 68359643   | 15979       | -0.8677711  | 0.547993     | 0             | Loss          | Gain            |
| Chr1_CNVR_27    | Chr1       | 70006383     | 70014373   | 7991        | -1.049355   | 0.483184     | 2.26E-238     | Loss          | Gain            |
| Chr1_CNVR_10    | Chr1       | 76010069     | 76018857   | 8789        | 1.208212    | 2.31051      | 0             | Gain          | Loss            |
| Chr1_CNVR_28    | Chr1       | 83146737     | 83158721   | 11985       | -0.9109823  | 0.531823     | 2.28E-282     | Loss          | Gain            |
| Chr1_CNVR_29    | Chr1       | 83439971     | 83455151   | 15181       | -0.8876318  | 0.540501     | 0             | Loss          | Gain            |
| Chr1_CNVR_11    | Chr1       | 88506429     | 88516017   | 9589        | 0.8655367   | 1.82202      | 7.74E-216     | Gain          | Loss            |
| Chr1_CNVR_12    | Chr1       | 92989619     | 93007195   | 17577       | 0.904218    | 1.87153      | 0             | Gain          | Loss            |
| Chr1_CNVR_13    | Chr1       | 93012789     | 93026371   | 13583       | 1.263202    | 2.40028      | 0             | Gain          | Loss            |
| Chr1_CNVR_30    | Chr1       | 93717507     | 93830965   | 113459      | -5.493212   | 0.0222013    | 0             | Loss          | Gain            |
| Chr1_CNVR_31    | Chr1       | 97519949     | 97544717   | 24769       | -3.483555   | 0.0894016    | 0             | Loss          | Gain            |
| Chr1_CNVR_14    | Chr1       | 104071749    | 104082933  | 11185       | 2.573177    | 5.95119      | 0             | Gain          | Loss            |
| Chr1_CNVR_32    | Chr1       | 111641475    | 111651861  | 10387       | -0.896531   | 0.537177     | 1.73E-238     | Loss          | Gain            |
| Chr1_CNVR_15    | Chr1       | 118623935    | 118635919  | 11985       | 1.156044    | 2.22846      | 0             | Gain          | Loss            |
| Chr1_CNVR_33    | Chr1       | 128889487    | 128897477  | 7991        | -0.8763933  | 0.544728     | 5.29E-177     | Loss          | Gain            |
| Chr1_CNVR_34    | Chr1       | 143506393    | 143514383  | 7991        | -0.8006926  | 0.574074     | 1.34E-151     | Loss          | Gain            |
| Chr1_CNVR_35    | Chr1       | 143523173    | 143532759  | 9587        | -0.9038     | 0.534477     | 2.51E-223     | Loss          | Gain            |
| Chr1_CNVR_36    | Chr1       | 143647017    | 143658203  | 11187       | -0.8677336  | 0.548007     | 8.00E-243     | Loss          | Gain            |
| Chr1_CNVR_37    | Chr1       | 143839577    | 143853957  | 14381       | -0.864625   | 0.549189     | 0             | Loss          | Gain            |
| Chr1_CNVR_38    | Chr1       | 144030537    | 144040923  | 10387       | -0.8310464  | 0.562121     | 1.58E-209     | Loss          | Gain            |
| Chr1_CNVR_39    | Chr1       | 144422847    | 144431635  | 8789        | -0.9686699  | 0.510977     | 5.42E-230     | Loss          | Gain            |
| Chr1_CNVR_40    | Chr1       | 144446017    | 144454007  | 7991        | -0.9079452  | 0.532944     | 6.79E-188     | Loss          | Gain            |
| Chr1_CNVR_41    | Chr1       | 144467591    | 144475579  | 7989        | -0.8086849  | 0.570902     | 3.15E-154     | Loss          | Gain            |
| Chr1_CNVR_42    | Chr1       | 144491561    | 144504343  | 12783       | -0.8740252  | 0.545622     | 1.21E-280     | Loss          | Gain            |
| Chr1_CNVR_43    | Chr1       | 144514731    | 144524319  | 9589        | -0.8816358  | 0.542752     | 3.81E-214     | Loss          | Gain            |
| Chr1_CNVR_44    | Chr1       | 144787191    | 144797577  | 10387       | -0.9382373  | 0.52187      | 2.07E-257     | Loss          | Gain            |
| Chr1_CNVR_45    | Chr1       | 144928613    | 144939799  | 11187       | -0.860793   | 0.55065      | 1.62E-239     | Loss          | Gain            |
| Chr1_CNVR_46    | Chr1       | 144972559    | 144982145  | 9587        | -0.8627094  | 0.549919     | 2.20E-206     | Loss          | Gain            |
| Chr1_CNVR_47    | Chr1       | 145009313    | 145018101  | 8789        | -1.004568   | 0.498419     | 3.87E-244     | Loss          | Gain            |
| Chr1_CNVR_48    | Chr1       | 145227439    | 145236227  | 8789        | -1.019031   | 0.493448     | 6.99E-250     | Loss          | Gain            |
| Chr1_CNVR_49    | Chr1       | 145453557    | 145463143  | 9587        | -0.8346671  | 0.560712     | 5.03E-195     | Loss          | Gain            |
| Chr1_CNVR_50    | Chr1       | 145472733    | 145490309  | 17577       | -0.8929771  | 0.538502     | 0             | Loss          | Gain            |
| Chr1_CNVR_51    | Chr1       | 145593381    | 145604567  | 11187       | -0.8654054  | 0.548892     | 1.03E-241     | Loss          | Gain            |
| Chr1_CNVR_52    | Chr1       | 145610161    | 145626939  | 16779       | -0.8557484  | 0.552579     | 0             | Loss          | Gain            |

|               |       |           |           |       |            |          |           |      |      |
|---------------|-------|-----------|-----------|-------|------------|----------|-----------|------|------|
| Chr1_CNVR_53  | Chr1  | 145630935 | 145646115 | 15181 | -0.954093  | 0.516166 | 0         | Loss | Gain |
| Chr1_CNVR_54  | Chr1  | 145646915 | 145656501 | 9587  | -0.8310424 | 0.562123 | 1.43E-193 | Loss | Gain |
| Chr1_CNVR_55  | Chr1  | 145657301 | 145666889 | 9589  | -0.8491554 | 0.55511  | 7.17E-201 | Loss | Gain |
| Chr1_CNVR_56  | Chr1  | 145678875 | 145694853 | 15979 | -0.9925047 | 0.502604 | 0         | Loss | Gain |
| Chr1_CNVR_57  | Chr1  | 145698051 | 145709235 | 11185 | -0.9334261 | 0.523613 | 1.12E-274 | Loss | Gain |
| Chr1_CNVR_58  | Chr1  | 145757177 | 145765165 | 7989  | -0.9227436 | 0.527505 | 4.67E-193 | Loss | Gain |
| Chr1_CNVR_59  | Chr1  | 145766765 | 145780347 | 13583 | -0.9270133 | 0.525946 | 0         | Loss | Gain |
| Chr1_CNVR_60  | Chr1  | 145783543 | 145791533 | 7991  | -1.077409  | 0.473879 | 1.25E-248 | Loss | Gain |
| Chr1_CNVR_61  | Chr1  | 145792333 | 145802719 | 10387 | -0.9289083 | 0.525256 | 3.78E-253 | Loss | Gain |
| Chr1_CNVR_62  | Chr1  | 145817901 | 145845065 | 27165 | -0.930472  | 0.524687 | 0         | Loss | Gain |
| Chr1_CNVR_63  | Chr1  | 145853855 | 145862643 | 8789  | -0.8923581 | 0.538733 | 1.55E-200 | Loss | Gain |
| Chr1_CNVR_64  | Chr1  | 146024841 | 146032831 | 7991  | -0.8829867 | 0.542244 | 2.89E-179 | Loss | Gain |
| Chr1_CNVR_65  | Chr1  | 146041621 | 146051207 | 9587  | -0.8541701 | 0.553183 | 6.62E-203 | Loss | Gain |
| Chr1_CNVR_66  | Chr1  | 146172657 | 146181445 | 8789  | -0.8354356 | 0.560414 | 3.15E-179 | Loss | Gain |
| Chr1_CNVR_67  | Chr1  | 146260547 | 146270133 | 9587  | -0.9082823 | 0.532819 | 3.40E-225 | Loss | Gain |
| Chr1_CNVR_68  | Chr1  | 146493055 | 146509833 | 16779 | -0.9099926 | 0.532188 | 0         | Loss | Gain |
| Chr1_CNVR_69  | Chr1  | 146540995 | 146548985 | 7991  | -0.9029167 | 0.534804 | 3.79E-186 | Loss | Gain |
| Chr1_CNVR_70  | Chr1  | 146572157 | 146581743 | 9587  | -0.894119  | 0.538076 | 2.64E-219 | Loss | Gain |
| Chr1_CNVR_71  | Chr1  | 146588137 | 146606513 | 18377 | -0.9346985 | 0.523152 | 0         | Loss | Gain |
| Chr1_CNVR_72  | Chr1  | 146627287 | 146638473 | 11187 | -0.8655241 | 0.548847 | 9.06E-242 | Loss | Gain |
| Chr1_CNVR_73  | Chr1  | 146650459 | 146659247 | 8789  | -0.7645483 | 0.588638 | 1.14E-153 | Loss | Gain |
| Chr1_CNVR_74  | Chr1  | 146683217 | 146696799 | 13583 | -0.8635344 | 0.549604 | 5.77E-292 | Loss | Gain |
| Chr1_CNVR_75  | Chr1  | 146831033 | 146839821 | 8789  | -0.8191956 | 0.566758 | 2.85E-173 | Loss | Gain |
| Chr1_CNVR_76  | Chr1  | 146853405 | 146861393 | 7989  | -0.9195764 | 0.528664 | 5.99E-192 | Loss | Gain |
| Chr1_CNVR_77  | Chr1  | 146864591 | 146880569 | 15979 | -0.9229275 | 0.527438 | 0         | Loss | Gain |
| Chr1_CNVR_78  | Chr1  | 146953279 | 146962067 | 8789  | -0.943585  | 0.519939 | 3.29E-220 | Loss | Gain |
| Chr1_CNVR_79  | Chr1  | 146970059 | 146986037 | 15979 | -0.9287916 | 0.525298 | 0         | Loss | Gain |
| Chr1_CNVR_80  | Chr1  | 146986837 | 146997223 | 10387 | -0.891793  | 0.538944 | 2.33E-236 | Loss | Gain |
| Chr1_CNVR_81  | Chr1  | 147003617 | 147017997 | 14381 | -0.9562752 | 0.515386 | 0         | Loss | Gain |
| Chr1_CNVR_82  | Chr1  | 147029185 | 147037173 | 7989  | -1.015101  | 0.494794 | 6.15E-226 | Loss | Gain |
| Chr1_CNVR_83  | Chr1  | 147037973 | 147047561 | 9589  | -0.9197924 | 0.528585 | 5.21E-230 | Loss | Gain |
| Chr1_CNVR_84  | Chr1  | 147050757 | 147059545 | 8789  | -0.9559021 | 0.515519 | 5.31E-225 | Loss | Gain |
| Chr1_CNVR_85  | Chr1  | 147324015 | 147341593 | 17579 | -0.8469772 | 0.555948 | 0         | Loss | Gain |
| Chr1_CNVR_86  | Chr1  | 147591681 | 147599669 | 7989  | -0.821828  | 0.565725 | 1.40E-158 | Loss | Gain |
| Chr1_CNVR_87  | Chr1  | 154054791 | 154064379 | 9589  | -0.8670213 | 0.548278 | 3.82E-208 | Loss | Gain |
| Chr1_CNVR_88  | Chr1  | 155073517 | 155088697 | 15181 | -0.8427423 | 0.557583 | 0         | Loss | Gain |
| Chr10_CNVR_26 | Chr10 | 40735     | 49495     | 8761  | -0.8420484 | 0.557851 | 5.65E-165 | Loss | Gain |
| Chr10_CNVR_27 | Chr10 | 71395     | 82783     | 11389 | -0.949152  | 0.517937 | 1.78E-261 | Loss | Gain |
| Chr10_CNVR_28 | Chr10 | 20409487  | 20418247  | 8761  | -0.8487664 | 0.555259 | 3.22E-167 | Loss | Gain |
| Chr10_CNVR_29 | Chr10 | 21345931  | 21355567  | 9637  | -0.9501665 | 0.517573 | 5.76E-222 | Loss | Gain |
| Chr10_CNVR_1  | Chr10 | 22538167  | 22548679  | 10513 | 0.8714351  | 1.82948  | 1.76E-224 | Gain | Loss |
| Chr10_CNVR_2  | Chr10 | 22567951  | 22576711  | 8761  | 0.875389   | 1.8345   | 6.70E-189 | Gain | Loss |
| Chr10_CNVR_3  | Chr10 | 22580215  | 22608247  | 28033 | 1.195155   | 2.28969  | 0         | Gain | Loss |
| Chr10_CNVR_4  | Chr10 | 22620511  | 22645915  | 25405 | 1.159007   | 2.23304  | 0         | Gain | Loss |
| Chr10_CNVR_5  | Chr10 | 22715119  | 22738771  | 23653 | 2.311594   | 4.96431  | 0         | Gain | Loss |
| Chr10_CNVR_6  | Chr10 | 22766803  | 22777315  | 10513 | 0.866322   | 1.82301  | 3.49E-222 | Gain | Loss |
| Chr10_CNVR_7  | Chr10 | 22851775  | 22864915  | 13141 | 0.8311917  | 1.77915  | 1.03E-257 | Gain | Loss |
| Chr10_CNVR_8  | Chr10 | 22888567  | 22902583  | 14017 | 0.8533532  | 1.8067   | 8.31E-288 | Gain | Loss |
| Chr10_CNVR_9  | Chr10 | 22905211  | 22931491  | 26281 | 0.9732257  | 1.96323  | 0         | Gain | Loss |
| Chr10_CNVR_10 | Chr10 | 22942003  | 22952515  | 10513 | 1.062172   | 2.08807  | 0         | Gain | Loss |
| Chr10_CNVR_11 | Chr10 | 22959523  | 22968283  | 8761  | 0.9258542  | 1.89981  | 3.96E-208 | Gain | Loss |
| Chr10_CNVR_12 | Chr10 | 23055883  | 23064643  | 8761  | 0.8700124  | 1.82768  | 6.98E-187 | Gain | Loss |
| Chr10_CNVR_13 | Chr10 | 23529799  | 23543815  | 14017 | 0.93429    | 1.91095  | 0         | Gain | Loss |
| Chr10_CNVR_14 | Chr10 | 23582359  | 23634043  | 51685 | 1.439184   | 2.71167  | 0         | Gain | Loss |
| Chr10_CNVR_15 | Chr10 | 23669959  | 23683099  | 13141 | 4.353486   | 20.4423  | 0         | Gain | Loss |
| Chr10_CNVR_16 | Chr10 | 23686603  | 23701495  | 14893 | 2.958522   | 7.77327  | 0         | Gain | Loss |

|               |       |           |           |        |            |           |           |      |      |
|---------------|-------|-----------|-----------|--------|------------|-----------|-----------|------|------|
| Chr10_CNVR_30 | Chr10 | 24075547  | 24109711  | 34165  | -1.679103  | 0.312277  | 0         | Loss | Gain |
| Chr10_CNVR_31 | Chr10 | 24112339  | 24138619  | 26281  | -2.759019  | 0.147724  | 0         | Loss | Gain |
| Chr10_CNVR_32 | Chr10 | 24154387  | 24164023  | 9637   | -1.061456  | 0.479148  | 1.50E-265 | Loss | Gain |
| Chr10_CNVR_33 | Chr10 | 24168403  | 24185047  | 16645  | -0.9471654 | 0.518651  | 0         | Loss | Gain |
| Chr10_CNVR_34 | Chr10 | 24192055  | 24206947  | 14893  | -0.9011066 | 0.535476  | 0         | Loss | Gain |
| Chr10_CNVR_35 | Chr10 | 24230599  | 24239359  | 8761   | -0.8765247 | 0.544678  | 1.42E-176 | Loss | Gain |
| Chr10_CNVR_36 | Chr10 | 24255127  | 24271771  | 16645  | -0.9378067 | 0.522026  | 0         | Loss | Gain |
| Chr10_CNVR_17 | Chr10 | 24785107  | 24807007  | 21901  | 1.486987   | 2.80303   | 0         | Gain | Loss |
| Chr10_CNVR_18 | Chr10 | 24905995  | 24914755  | 8761   | 1.440201   | 2.71359   | 0         | Gain | Loss |
| Chr10_CNVR_19 | Chr10 | 25158283  | 25173175  | 14893  | 2.269064   | 4.8201    | 0         | Gain | Loss |
| Chr10_CNVR_20 | Chr10 | 27364051  | 27372811  | 8761   | 2.098832   | 4.28362   | 0         | Gain | Loss |
| Chr10_CNVR_21 | Chr10 | 27635611  | 27660139  | 24529  | 1.347704   | 2.54507   | 0         | Gain | Loss |
| Chr10_CNVR_22 | Chr10 | 33084331  | 33098347  | 14017  | 1.18737    | 2.27737   | 0         | Gain | Loss |
| Chr10_CNVR_37 | Chr10 | 36067987  | 36077623  | 9637   | -0.8581268 | 0.551668  | 3.45E-187 | Loss | Gain |
| Chr10_CNVR_38 | Chr10 | 37351327  | 37362715  | 11389  | -0.8261677 | 0.564026  | 5.40E-207 | Loss | Gain |
| Chr10_CNVR_39 | Chr10 | 37367095  | 37379359  | 12265  | -0.8815607 | 0.54278   | 9.22E-249 | Loss | Gain |
| Chr10_CNVR_23 | Chr10 | 41589415  | 41599051  | 9637   | 1.426073   | 2.68714   | 0         | Gain | Loss |
| Chr10_CNVR_24 | Chr10 | 53139475  | 53155243  | 15769  | 1.038081   | 2.05349   | 0         | Gain | Loss |
| Chr10_CNVR_40 | Chr10 | 65506843  | 65517355  | 10513  | -0.7962364 | 0.575849  | 1.81E-179 | Loss | Gain |
| Chr10_CNVR_25 | Chr10 | 79247779  | 79262671  | 14893  | 1.342099   | 2.5352    | 0         | Gain | Loss |
| Chr10_CNVR_41 | Chr10 | 80967367  | 80976127  | 8761   | -0.8787095 | 0.543854  | 2.57E-177 | Loss | Gain |
| Chr10_CNVR_42 | Chr10 | 86256655  | 86268043  | 11389  | -0.8233842 | 0.565115  | 8.46E-206 | Loss | Gain |
| Chr10_CNVR_43 | Chr10 | 86269795  | 86280307  | 10513  | -0.8805188 | 0.543172  | 4.21E-213 | Loss | Gain |
| Chr10_CNVR_44 | Chr10 | 88671787  | 88681423  | 9637   | -0.8606615 | 0.5507    | 3.98E-188 | Loss | Gain |
| Chr10_CNVR_45 | Chr10 | 89189503  | 89202643  | 13141  | -0.8128222 | 0.569267  | 6.30E-232 | Loss | Gain |
| Chr10_CNVR_46 | Chr10 | 89252575  | 89261335  | 8761   | -0.8217747 | 0.565746  | 2.98E-158 | Loss | Gain |
| Chr10_CNVR_47 | Chr10 | 96710839  | 96720475  | 9637   | -2.076961  | 0.237013  | 0         | Loss | Gain |
| Chr10_CNVR_48 | Chr10 | 100027375 | 100044895 | 17521  | -0.9185388 | 0.529045  | 0         | Loss | Gain |
| Chr10_CNVR_49 | Chr10 | 103120531 | 103131043 | 10513  | -0.8004188 | 0.574182  | 4.23E-181 | Loss | Gain |
| Chr12_CNVR_1  | Chr12 | 6718843   | 6727683   | 8841   | 0.8479306  | 1.79992   | 2.56E-174 | Gain | Loss |
| Chr12_CNVR_33 | Chr12 | 15563263  | 15572103  | 8841   | -1.062884  | 0.478674  | 3.85E-243 | Loss | Gain |
| Chr12_CNVR_2  | Chr12 | 24263591  | 24274199  | 10609  | 0.9887578  | 1.98448   | 1.41E-271 | Gain | Loss |
| Chr12_CNVR_34 | Chr12 | 31002323  | 31013815  | 11493  | -0.8363831 | 0.560046  | 9.28E-212 | Loss | Gain |
| Chr12_CNVR_35 | Chr12 | 32023343  | 32070195  | 46853  | -3.235371  | 0.106183  | 0         | Loss | Gain |
| Chr12_CNVR_36 | Chr12 | 32071079  | 32100251  | 29173  | -4.124964  | 0.0573142 | 0         | Loss | Gain |
| Chr12_CNVR_37 | Chr12 | 32102019  | 32189535  | 87517  | -3.015104  | 0.123698  | 0         | Loss | Gain |
| Chr12_CNVR_38 | Chr12 | 32191303  | 32201027  | 9725   | -2.613202  | 0.163436  | 0         | Loss | Gain |
| Chr12_CNVR_39 | Chr12 | 32305339  | 32316831  | 11493  | -0.8100415 | 0.570365  | 2.21E-200 | Loss | Gain |
| Chr12_CNVR_40 | Chr12 | 32995743  | 33007235  | 11493  | -0.9350836 | 0.523012  | 7.95E-256 | Loss | Gain |
| Chr12_CNVR_41 | Chr12 | 34517107  | 34527715  | 10609  | -0.8404806 | 0.558458  | 2.80E-197 | Loss | Gain |
| Chr12_CNVR_42 | Chr12 | 34540091  | 34548931  | 8841   | -0.8727228 | 0.546115  | 1.16E-175 | Loss | Gain |
| Chr12_CNVR_43 | Chr12 | 35463871  | 35475363  | 11493  | -0.8437966 | 0.557175  | 5.42E-215 | Loss | Gain |
| Chr12_CNVR_3  | Chr12 | 70639115  | 70657679  | 18565  | 2.694945   | 6.47529   | 0         | Gain | Loss |
| Chr12_CNVR_4  | Chr12 | 70725747  | 70769063  | 43317  | 1.04448    | 2.06262   | 0         | Gain | Loss |
| Chr12_CNVR_5  | Chr12 | 70784975  | 70815915  | 30941  | 1.260374   | 2.39558   | 0         | Gain | Loss |
| Chr12_CNVR_6  | Chr12 | 70817683  | 70998903  | 181221 | 4.524683   | 23.0179   | 0         | Gain | Loss |
| Chr12_CNVR_7  | Chr12 | 71000671  | 71010395  | 9725   | 3.847025   | 14.3903   | 0         | Gain | Loss |
| Chr12_CNVR_8  | Chr12 | 71021003  | 71033379  | 12377  | 1.091101   | 2.13037   | 0         | Gain | Loss |
| Chr12_CNVR_9  | Chr12 | 71041335  | 71215483  | 174149 | 4.787911   | 27.6252   | 0         | Gain | Loss |
| Chr12_CNVR_44 | Chr12 | 71281783  | 71304767  | 22985  | -0.8983577 | 0.536497  | 0         | Loss | Gain |
| Chr12_CNVR_45 | Chr12 | 71305651  | 71346315  | 40665  | -1.831264  | 0.281018  | 0         | Loss | Gain |
| Chr12_CNVR_10 | Chr12 | 71348967  | 71362227  | 13261  | 1.043265   | 2.06089   | 0         | Gain | Loss |
| Chr12_CNVR_11 | Chr12 | 71459467  | 71473611  | 14145  | 1.244673   | 2.36965   | 0         | Gain | Loss |
| Chr12_CNVR_12 | Chr12 | 71474495  | 71496595  | 22101  | 1.007643   | 2.01062   | 0         | Gain | Loss |
| Chr12_CNVR_13 | Chr12 | 71497479  | 71506319  | 8841   | 1.032018   | 2.04488   | 2.24E-243 | Gain | Loss |
| Chr12_CNVR_14 | Chr12 | 71508971  | 71518695  | 9725   | 0.9342099  | 1.91084   | 2.27E-226 | Gain | Loss |

|               |       |          |          |        |            |           |           |      |      |
|---------------|-------|----------|----------|--------|------------|-----------|-----------|------|------|
| Chr12_CNVR_15 | Chr12 | 71549635 | 71574387 | 24753  | 1.122313   | 2.17696   | 0         | Gain | Loss |
| Chr12_CNVR_46 | Chr12 | 71653947 | 71665439 | 11493  | -1.96233   | 0.256614  | 0         | Loss | Gain |
| Chr12_CNVR_16 | Chr12 | 71681351 | 71690191 | 8841   | 1.106602   | 2.15338   | 1.15E-272 | Gain | Loss |
| Chr12_CNVR_47 | Chr12 | 71811299 | 71828979 | 17681  | -1.059056  | 0.479946  | 0         | Loss | Gain |
| Chr12_CNVR_48 | Chr12 | 71835167 | 71895279 | 60113  | -1.780223  | 0.291138  | 0         | Loss | Gain |
| Chr12_CNVR_17 | Chr12 | 71954507 | 71964231 | 9725   | 0.8926469  | 1.85658   | 2.14E-209 | Gain | Loss |
| Chr12_CNVR_18 | Chr12 | 71996055 | 72005779 | 9725   | 0.8910481  | 1.85452   | 9.47E-209 | Gain | Loss |
| Chr12_CNVR_49 | Chr12 | 72033183 | 72050863 | 17681  | -1.027679  | 0.490499  | 0         | Loss | Gain |
| Chr12_CNVR_19 | Chr12 | 72174623 | 72195839 | 21217  | 0.9689731  | 1.95745   | 0         | Gain | Loss |
| Chr12_CNVR_50 | Chr12 | 72206447 | 72243575 | 37129  | -1.601569  | 0.329518  | 0         | Loss | Gain |
| Chr12_CNVR_20 | Chr12 | 72245343 | 72255951 | 10609  | 0.9562512  | 1.94026   | 1.02E-256 | Gain | Loss |
| Chr12_CNVR_51 | Chr12 | 72509659 | 72734195 | 224537 | -5.092275  | 0.0293138 | 0         | Loss | Gain |
| Chr12_CNVR_52 | Chr12 | 72736847 | 72745687 | 8841   | -4.688685  | 0.0387762 | 0         | Loss | Gain |
| Chr12_CNVR_53 | Chr12 | 72842043 | 72851767 | 9725   | -1.190997  | 0.438     | 0         | Loss | Gain |
| Chr12_CNVR_54 | Chr12 | 72870331 | 72881823 | 11493  | -1.731722  | 0.301092  | 0         | Loss | Gain |
| Chr12_CNVR_55 | Chr12 | 72911879 | 72933095 | 21217  | -2.398548  | 0.189655  | 0         | Loss | Gain |
| Chr12_CNVR_56 | Chr12 | 72951659 | 72967571 | 15913  | -2.044806  | 0.242355  | 0         | Loss | Gain |
| Chr12_CNVR_57 | Chr12 | 72988787 | 72998511 | 9725   | -1.487658  | 0.356591  | 0         | Loss | Gain |
| Chr12_CNVR_58 | Chr12 | 73019727 | 73028567 | 8841   | -1.123824  | 0.458876  | 1.61E-265 | Loss | Gain |
| Chr12_CNVR_59 | Chr12 | 73035639 | 73062159 | 26521  | -1.155476  | 0.448918  | 0         | Loss | Gain |
| Chr12_CNVR_60 | Chr12 | 73141719 | 73162051 | 20333  | -1.599626  | 0.329963  | 0         | Loss | Gain |
| Chr12_CNVR_61 | Chr12 | 73241611 | 73264595 | 22985  | -2.790227  | 0.144563  | 0         | Loss | Gain |
| Chr12_CNVR_21 | Chr12 | 73306143 | 73323823 | 17681  | 1.107431   | 2.15462   | 0         | Gain | Loss |
| Chr12_CNVR_62 | Chr12 | 73379515 | 73391007 | 11493  | -2.041026  | 0.242991  | 0         | Loss | Gain |
| Chr12_CNVR_22 | Chr12 | 73523607 | 73549243 | 25637  | 1.097092   | 2.13923   | 0         | Gain | Loss |
| Chr12_CNVR_23 | Chr12 | 73550127 | 73573111 | 22985  | 1.227336   | 2.34134   | 0         | Gain | Loss |
| Chr12_CNVR_63 | Chr12 | 73584603 | 73702175 | 117573 | -2.594695  | 0.165546  | 0         | Loss | Gain |
| Chr12_CNVR_24 | Chr12 | 73755215 | 73764939 | 9725   | 2.186318   | 4.55142   | 0         | Gain | Loss |
| Chr12_CNVR_64 | Chr12 | 73815327 | 73846267 | 30941  | -1.746737  | 0.297975  | 0         | Loss | Gain |
| Chr12_CNVR_65 | Chr12 | 73885163 | 73916987 | 31825  | -2.437999  | 0.184539  | 0         | Loss | Gain |
| Chr12_CNVR_66 | Chr12 | 73920523 | 73957651 | 37129  | -1.918563  | 0.264518  | 0         | Loss | Gain |
| Chr12_CNVR_67 | Chr12 | 73990359 | 73999199 | 8841   | -1.366285  | 0.387889  | 0         | Loss | Gain |
| Chr12_CNVR_68 | Chr12 | 74001851 | 74011575 | 9725   | -2.108477  | 0.231892  | 0         | Loss | Gain |
| Chr12_CNVR_69 | Chr12 | 74035443 | 74046051 | 10609  | -1.714658  | 0.304675  | 0         | Loss | Gain |
| Chr12_CNVR_70 | Chr12 | 74046935 | 74075223 | 28289  | -3.8385    | 0.0699031 | 0         | Loss | Gain |
| Chr12_CNVR_71 | Chr12 | 74090251 | 74099975 | 9725   | -3.865365  | 0.0686134 | 0         | Loss | Gain |
| Chr12_CNVR_72 | Chr12 | 74118539 | 74137103 | 18565  | -3.653343  | 0.0794757 | 0         | Loss | Gain |
| Chr12_CNVR_73 | Chr12 | 74137987 | 74170695 | 32709  | -2.721402  | 0.151627  | 0         | Loss | Gain |
| Chr12_CNVR_74 | Chr12 | 74249371 | 74278543 | 29173  | -2.117708  | 0.230413  | 0         | Loss | Gain |
| Chr12_CNVR_75 | Chr12 | 74288267 | 74304179 | 15913  | -2.27897   | 0.206045  | 0         | Loss | Gain |
| Chr12_CNVR_76 | Chr12 | 74657779 | 74671039 | 13261  | -1.332435  | 0.397097  | 0         | Loss | Gain |
| Chr12_CNVR_77 | Chr12 | 74680763 | 74713471 | 32709  | -2.978169  | 0.126906  | 0         | Loss | Gain |
| Chr12_CNVR_78 | Chr12 | 74714355 | 74726731 | 12377  | -1.920502  | 0.264163  | 0         | Loss | Gain |
| Chr12_CNVR_79 | Chr12 | 74770931 | 75041435 | 270505 | -3.037057  | 0.12183   | 0         | Loss | Gain |
| Chr12_CNVR_80 | Chr12 | 75106851 | 75136023 | 29173  | -3.796941  | 0.071946  | 0         | Loss | Gain |
| Chr12_CNVR_81 | Chr12 | 75136907 | 75146631 | 9725   | -1.329325  | 0.397954  | 0         | Loss | Gain |
| Chr12_CNVR_82 | Chr12 | 75147515 | 75185527 | 38013  | -2.082994  | 0.236024  | 0         | Loss | Gain |
| Chr12_CNVR_83 | Chr12 | 75186411 | 75217351 | 30941  | -2.29162   | 0.204246  | 0         | Loss | Gain |
| Chr12_CNVR_84 | Chr12 | 75223539 | 75233263 | 9725   | -1.278093  | 0.41234   | 0         | Loss | Gain |
| Chr12_CNVR_85 | Chr12 | 75427743 | 75444539 | 16797  | -1.950985  | 0.25864   | 0         | Loss | Gain |
| Chr12_CNVR_86 | Chr12 | 75448075 | 75463103 | 15029  | -0.9713492 | 0.510029  | 0         | Loss | Gain |
| Chr12_CNVR_87 | Chr12 | 75546199 | 75561227 | 15029  | -1.292733  | 0.408177  | 0         | Loss | Gain |
| Chr12_CNVR_88 | Chr12 | 75577139 | 75607195 | 30057  | -1.530388  | 0.346184  | 0         | Loss | Gain |
| Chr12_CNVR_89 | Chr12 | 75608963 | 75619571 | 10609  | -0.9168475 | 0.529665  | 1.18E-228 | Loss | Gain |
| Chr12_CNVR_25 | Chr12 | 75957259 | 75967867 | 10609  | 3.255356   | 9.54904   | 0         | Gain | Loss |
| Chr12_CNVR_26 | Chr12 | 75972287 | 75990851 | 18565  | 1.882614   | 3.68743   | 0         | Gain | Loss |

|                |       |          |          |       |            |          |           |      |      |
|----------------|-------|----------|----------|-------|------------|----------|-----------|------|------|
| Chr12_CNVR_27  | Chr12 | 75997039 | 76012067 | 15029 | 1.643057   | 3.12327  | 0         | Gain | Loss |
| Chr12_CNVR_90  | Chr12 | 76077483 | 76086323 | 8841  | -1.825933  | 0.282059 | 0         | Loss | Gain |
| Chr12_CNVR_91  | Chr12 | 76233951 | 76248979 | 15029 | -2.132762  | 0.228021 | 0         | Loss | Gain |
| Chr12_CNVR_28  | Chr12 | 76312627 | 76322351 | 9725  | 1.219854   | 2.32923  | 0         | Gain | Loss |
| Chr12_CNVR_29  | Chr12 | 76346219 | 76406331 | 60113 | 1.377126   | 2.5975   | 0         | Gain | Loss |
| Chr12_CNVR_30  | Chr12 | 76407215 | 76419591 | 12377 | 1.537058   | 2.90202  | 0         | Gain | Loss |
| Chr12_CNVR_92  | Chr12 | 76460255 | 76471747 | 11493 | -2.643267  | 0.160065 | 0         | Loss | Gain |
| Chr12_CNVR_31  | Chr12 | 76472631 | 76481471 | 8841  | 1.380438   | 2.60347  | 0         | Gain | Loss |
| Chr12_CNVR_93  | Chr12 | 76481471 | 76498267 | 16797 | -3.29479   | 0.101899 | 0         | Loss | Gain |
| Chr12_CNVR_32  | Chr12 | 76500035 | 76514179 | 14145 | 1.559406   | 2.94732  | 0         | Gain | Loss |
| Chr12_CNVR_94  | Chr12 | 76514179 | 76523903 | 9725  | -3.317125  | 0.100333 | 0         | Loss | Gain |
| Chr12_CNVR_95  | Chr12 | 79438451 | 79449059 | 10609 | -0.8193592 | 0.566694 | 7.99E-189 | Loss | Gain |
| Chr12_CNVR_96  | Chr12 | 88587851 | 88601995 | 14145 | -0.8588803 | 0.55138  | 2.91E-272 | Loss | Gain |
| Chr12_CNVR_97  | Chr12 | 88643543 | 88654151 | 10609 | -0.9114201 | 0.531661 | 2.19E-226 | Loss | Gain |
| Chr12_CNVR_98  | Chr12 | 88868079 | 88876919 | 8841  | -0.9900417 | 0.503463 | 8.84E-217 | Loss | Gain |
| Chr12_CNVR_99  | Chr12 | 88877803 | 88906975 | 29173 | -0.8847348 | 0.541587 | 0         | Loss | Gain |
| Chr12_CNVR_100 | Chr12 | 88983883 | 89001563 | 17681 | -0.8686466 | 0.54766  | 0         | Loss | Gain |
| Chr12_CNVR_101 | Chr12 | 89013939 | 89026315 | 12377 | -0.8899538 | 0.539631 | 2.31E-253 | Loss | Gain |
| Chr12_CNVR_102 | Chr12 | 89036923 | 89055487 | 18565 | -1.01676   | 0.494225 | 0         | Loss | Gain |
| Chr12_CNVR_103 | Chr12 | 89074051 | 89082891 | 8841  | -0.8615003 | 0.55038  | 7.68E-172 | Loss | Gain |
| Chr12_CNVR_104 | Chr12 | 89092615 | 89156263 | 63649 | -0.9765159 | 0.508206 | 0         | Loss | Gain |
| Chr12_CNVR_105 | Chr12 | 89157147 | 89165987 | 8841  | -0.9026412 | 0.534907 | 5.88E-186 | Loss | Gain |
| Chr12_CNVR_106 | Chr12 | 89181015 | 89193391 | 12377 | -0.8788498 | 0.543801 | 5.04E-248 | Loss | Gain |
| Chr12_CNVR_107 | Chr12 | 89199579 | 89215491 | 15913 | -0.9056656 | 0.533786 | 0         | Loss | Gain |
| Chr12_CNVR_108 | Chr12 | 89219911 | 89234055 | 14145 | -0.8205774 | 0.566215 | 1.04E-251 | Loss | Gain |
| Chr12_CNVR_109 | Chr12 | 89237591 | 89253503 | 15913 | -0.9512941 | 0.517168 | 0         | Loss | Gain |
| Chr12_CNVR_110 | Chr12 | 89254387 | 89264111 | 9725  | -0.8940952 | 0.538085 | 4.29E-201 | Loss | Gain |
| Chr12_CNVR_111 | Chr12 | 89264995 | 89275603 | 10609 | -0.837701  | 0.559535 | 3.68E-196 | Loss | Gain |
| Chr12_CNVR_112 | Chr12 | 89341019 | 89357815 | 16797 | -0.8703588 | 0.547011 | 0         | Loss | Gain |
| Chr12_CNVR_113 | Chr12 | 89388755 | 89407319 | 18565 | -0.877302  | 0.544385 | 0         | Loss | Gain |
| Chr12_CNVR_114 | Chr12 | 89423231 | 89438259 | 15029 | -0.8992918 | 0.53615  | 0         | Loss | Gain |
| Chr12_CNVR_115 | Chr12 | 89443563 | 89474503 | 30941 | -0.9226352 | 0.527545 | 0         | Loss | Gain |
| Chr12_CNVR_116 | Chr12 | 89491299 | 89501023 | 9725  | -0.8593222 | 0.551211 | 5.26E-188 | Loss | Gain |
| Chr12_CNVR_117 | Chr12 | 89501907 | 89518703 | 16797 | -0.9659434 | 0.511944 | 0         | Loss | Gain |
| Chr12_CNVR_118 | Chr12 | 89532847 | 89554063 | 21217 | -0.9090014 | 0.532554 | 0         | Loss | Gain |
| Chr12_CNVR_119 | Chr12 | 89556715 | 89576163 | 19449 | -0.993534  | 0.502246 | 0         | Loss | Gain |
| Chr12_CNVR_120 | Chr12 | 89598263 | 89607987 | 9725  | -0.9405017 | 0.521052 | 6.85E-219 | Loss | Gain |
| Chr12_CNVR_121 | Chr12 | 89657491 | 89670751 | 13261 | -0.9613114 | 0.51359  | 0         | Loss | Gain |
| Chr12_CNVR_122 | Chr12 | 89680475 | 89692851 | 12377 | -0.8223331 | 0.565527 | 2.51E-221 | Loss | Gain |
| Chr12_CNVR_123 | Chr12 | 89694619 | 89705227 | 10609 | -0.9251181 | 0.526637 | 4.05E-232 | Loss | Gain |
| Chr12_CNVR_124 | Chr12 | 89731747 | 89741471 | 9725  | -0.8685199 | 0.547708 | 1.91E-191 | Loss | Gain |
| Chr12_CNVR_125 | Chr12 | 89752079 | 89766223 | 14145 | -0.934568  | 0.523199 | 0         | Loss | Gain |
| Chr12_CNVR_126 | Chr12 | 89830755 | 89839595 | 8841  | -0.8992542 | 0.536164 | 8.76E-185 | Loss | Gain |
| Chr12_CNVR_127 | Chr12 | 89840479 | 89854623 | 14145 | -0.9558545 | 0.515536 | 0         | Loss | Gain |
| Chr12_CNVR_128 | Chr12 | 89855507 | 89878491 | 22985 | -0.9514122 | 0.517126 | 0         | Loss | Gain |
| Chr12_CNVR_129 | Chr12 | 89879375 | 89925343 | 45969 | -0.9336105 | 0.523546 | 0         | Loss | Gain |
| Chr12_CNVR_130 | Chr12 | 89926227 | 89954515 | 28289 | -0.9665901 | 0.511714 | 0         | Loss | Gain |
| Chr12_CNVR_131 | Chr12 | 89981035 | 89991643 | 10609 | -0.9008876 | 0.535557 | 5.31E-222 | Loss | Gain |
| Chr12_CNVR_132 | Chr12 | 90049103 | 90066783 | 17681 | -0.864925  | 0.549075 | 0         | Loss | Gain |
| Chr12_CNVR_133 | Chr12 | 90068551 | 90080043 | 11493 | -0.8566489 | 0.552234 | 1.25E-220 | Loss | Gain |
| Chr12_CNVR_134 | Chr12 | 90081811 | 90102143 | 20333 | -0.9124156 | 0.531295 | 0         | Loss | Gain |
| Chr12_CNVR_135 | Chr12 | 90103911 | 90124243 | 20333 | -0.9525147 | 0.516731 | 0         | Loss | Gain |
| Chr12_CNVR_136 | Chr12 | 90135735 | 90147227 | 11493 | -1.003495  | 0.49879  | 1.89E-287 | Loss | Gain |
| Chr12_CNVR_137 | Chr12 | 90151647 | 90174631 | 22985 | -0.9259268 | 0.526342 | 0         | Loss | Gain |
| Chr12_CNVR_138 | Chr12 | 90178167 | 90199383 | 21217 | -0.9607335 | 0.513796 | 0         | Loss | Gain |
| Chr12_CNVR_139 | Chr12 | 90200267 | 90209991 | 9725  | -0.8394281 | 0.558865 | 1.27E-180 | Loss | Gain |

|                |       |          |          |       |            |          |           |      |      |
|----------------|-------|----------|----------|-------|------------|----------|-----------|------|------|
| Chr12_CNVR_140 | Chr12 | 90210875 | 90226787 | 15913 | -0.9526287 | 0.51669  | 0         | Loss | Gain |
| Chr12_CNVR_141 | Chr12 | 90229439 | 90281595 | 52157 | -0.8990082 | 0.536255 | 0         | Loss | Gain |
| Chr12_CNVR_142 | Chr12 | 90298391 | 90316955 | 18565 | -0.9653455 | 0.512156 | 0         | Loss | Gain |
| Chr12_CNVR_143 | Chr12 | 90331099 | 90347895 | 16797 | -1.06454   | 0.478125 | 0         | Loss | Gain |
| Chr12_CNVR_144 | Chr12 | 90348779 | 90438063 | 89285 | -1.057071  | 0.480607 | 0         | Loss | Gain |
| Chr12_CNVR_145 | Chr12 | 90439831 | 90473423 | 33593 | -1.202232  | 0.434602 | 0         | Loss | Gain |
| Chr12_CNVR_146 | Chr12 | 90475191 | 90490219 | 15029 | -1.171118  | 0.444077 | 0         | Loss | Gain |
| Chr12_CNVR_147 | Chr12 | 90491103 | 90521159 | 30057 | -1.023068  | 0.492069 | 0         | Loss | Gain |
| Chr12_CNVR_148 | Chr12 | 90530883 | 90543259 | 12377 | -0.9780625 | 0.507661 | 1.22E-296 | Loss | Gain |
| Chr12_CNVR_149 | Chr12 | 90544143 | 90559171 | 15029 | -0.9139449 | 0.530732 | 0         | Loss | Gain |
| Chr12_CNVR_150 | Chr12 | 90573315 | 90596299 | 22985 | -0.9737382 | 0.509185 | 0         | Loss | Gain |
| Chr12_CNVR_151 | Chr12 | 90610443 | 90619283 | 8841  | -1.010705  | 0.496304 | 3.32E-224 | Loss | Gain |
| Chr12_CNVR_152 | Chr12 | 90626355 | 90641383 | 15029 | -0.9821688 | 0.506218 | 0         | Loss | Gain |
| Chr12_CNVR_153 | Chr12 | 90642267 | 90664367 | 22101 | -1.010696  | 0.496307 | 0         | Loss | Gain |
| Chr12_CNVR_154 | Chr12 | 90665251 | 90689119 | 23869 | -0.9007679 | 0.535602 | 0         | Loss | Gain |
| Chr12_CNVR_155 | Chr12 | 90699727 | 90710335 | 10609 | -0.9320644 | 0.524108 | 4.86E-235 | Loss | Gain |
| Chr12_CNVR_156 | Chr12 | 90728899 | 90762491 | 33593 | -0.9682916 | 0.511111 | 0         | Loss | Gain |
| Chr12_CNVR_157 | Chr12 | 90778403 | 90819951 | 41549 | -1.009324  | 0.496779 | 0         | Loss | Gain |
| Chr12_CNVR_158 | Chr12 | 90820835 | 90871223 | 50389 | -1.026666  | 0.490843 | 0         | Loss | Gain |
| Chr12_CNVR_159 | Chr12 | 90872991 | 90892439 | 19449 | -1.026344  | 0.490953 | 0         | Loss | Gain |
| Chr12_CNVR_160 | Chr12 | 90893323 | 90949015 | 55693 | -1.017825  | 0.49386  | 0         | Loss | Gain |
| Chr12_CNVR_161 | Chr12 | 90949899 | 90963159 | 13261 | -0.9644494 | 0.512474 | 0         | Loss | Gain |
| Chr12_CNVR_162 | Chr12 | 90964043 | 90990563 | 26521 | -0.9484701 | 0.518182 | 0         | Loss | Gain |
| Chr12_CNVR_163 | Chr12 | 90991447 | 91001171 | 9725  | -0.8555054 | 0.552672 | 1.39E-186 | Loss | Gain |
| Chr15_CNVR_20  | Chr15 | 447      | 15610    | 15164 | -1.311633  | 0.402865 | 0         | Loss | Gain |
| Chr15_CNVR_1   | Chr15 | 9736627  | 9745546  | 8920  | 1.192675   | 2.28576  | 0         | Gain | Loss |
| Chr15_CNVR_2   | Chr15 | 11375231 | 11391286 | 16056 | 1.222975   | 2.33428  | 0         | Gain | Loss |
| Chr15_CNVR_21  | Chr15 | 24284255 | 24294066 | 9812  | -0.8297369 | 0.562632 | 8.64E-177 | Loss | Gain |
| Chr15_CNVR_22  | Chr15 | 28601535 | 28611346 | 9812  | -0.8643919 | 0.549278 | 1.62E-189 | Loss | Gain |
| Chr15_CNVR_23  | Chr15 | 28612239 | 28622942 | 10704 | -0.8528365 | 0.553695 | 6.74E-202 | Loss | Gain |
| Chr15_CNVR_24  | Chr15 | 30739659 | 30761066 | 21408 | -0.8719273 | 0.546416 | 0         | Loss | Gain |
| Chr15_CNVR_25  | Chr15 | 30762851 | 30774446 | 11596 | -0.8873179 | 0.540618 | 1.10E-233 | Loss | Gain |
| Chr15_CNVR_26  | Chr15 | 30778907 | 30790502 | 11596 | -0.9350247 | 0.523034 | 5.02E-255 | Loss | Gain |
| Chr15_CNVR_27  | Chr15 | 30800315 | 30810126 | 9812  | -0.8459116 | 0.556359 | 1.06E-182 | Loss | Gain |
| Chr15_CNVR_3   | Chr15 | 31856443 | 31865362 | 8920  | 3.579198   | 11.9521  | 0         | Gain | Loss |
| Chr15_CNVR_28  | Chr15 | 46553927 | 46563738 | 9812  | -1.719836  | 0.303583 | 0         | Loss | Gain |
| Chr15_CNVR_4   | Chr15 | 46826879 | 46838474 | 11596 | 1.117368   | 2.16951  | 0         | Gain | Loss |
| Chr15_CNVR_5   | Chr15 | 46878615 | 46890210 | 11596 | 1.006086   | 2.00845  | 0         | Gain | Loss |
| Chr15_CNVR_6   | Chr15 | 46891103 | 46902698 | 11596 | 1.231811   | 2.34862  | 0         | Gain | Loss |
| Chr15_CNVR_7   | Chr15 | 46909835 | 46918754 | 8920  | 0.9420254  | 1.92122  | 7.13E-216 | Gain | Loss |
| Chr15_CNVR_8   | Chr15 | 47817891 | 47854462 | 36572 | 4.052086   | 16.5882  | 0         | Gain | Loss |
| Chr15_CNVR_9   | Chr15 | 48069435 | 48078354 | 8920  | 0.9986636  | 1.99815  | 2.33E-238 | Gain | Loss |
| Chr15_CNVR_10  | Chr15 | 49090775 | 49129130 | 38356 | 1.40026    | 2.63949  | 0         | Gain | Loss |
| Chr15_CNVR_29  | Chr15 | 49295043 | 49310206 | 15164 | -0.9733781 | 0.509312 | 0         | Loss | Gain |
| Chr15_CNVR_30  | Chr15 | 49311991 | 49320910 | 8920  | -0.9757269 | 0.508484 | 6.57E-211 | Loss | Gain |
| Chr15_CNVR_31  | Chr15 | 50719567 | 50754354 | 34788 | -2.573361  | 0.168012 | 0         | Loss | Gain |
| Chr15_CNVR_32  | Chr15 | 50789143 | 50807874 | 18732 | -1.950178  | 0.258784 | 0         | Loss | Gain |
| Chr15_CNVR_11  | Chr15 | 50811443 | 50831066 | 19624 | 0.964242   | 1.95104  | 0         | Gain | Loss |
| Chr15_CNVR_12  | Chr15 | 51085287 | 51104910 | 19624 | 3.517807   | 11.4542  | 0         | Gain | Loss |
| Chr15_CNVR_33  | Chr15 | 52215451 | 52227938 | 12488 | -1.381368  | 0.383855 | 0         | Loss | Gain |
| Chr15_CNVR_34  | Chr15 | 52228831 | 52256482 | 27652 | -1.116162  | 0.461319 | 0         | Loss | Gain |
| Chr15_CNVR_35  | Chr15 | 52263619 | 52283242 | 19624 | -2.775187  | 0.146078 | 0         | Loss | Gain |
| Chr15_CNVR_36  | Chr15 | 52549059 | 52561546 | 12488 | -1.560882  | 0.338944 | 0         | Loss | Gain |
| Chr15_CNVR_37  | Chr15 | 52954027 | 52962946 | 8920  | -0.8539873 | 0.553254 | 5.59E-169 | Loss | Gain |
| Chr15_CNVR_38  | Chr15 | 53017359 | 53033414 | 16056 | -0.81176   | 0.569686 | 2.61E-277 | Loss | Gain |
| Chr15_CNVR_39  | Chr15 | 53053931 | 53063742 | 9812  | -0.8992931 | 0.536149 | 1.48E-202 | Loss | Gain |

|               |       |          |          |       |            |          |           |      |      |
|---------------|-------|----------|----------|-------|------------|----------|-----------|------|------|
| Chr15_CNVR_40 | Chr15 | 53610539 | 53621242 | 10704 | -0.8979881 | 0.536635 | 3.03E-220 | Loss | Gain |
| Chr15_CNVR_41 | Chr15 | 55408811 | 55418622 | 9812  | -0.8076439 | 0.571314 | 8.36E-169 | Loss | Gain |
| Chr15_CNVR_42 | Chr15 | 56385551 | 56395362 | 9812  | -0.8712653 | 0.546667 | 4.57E-192 | Loss | Gain |
| Chr15_CNVR_43 | Chr15 | 56851175 | 56869014 | 17840 | -0.8467826 | 0.556023 | 0         | Loss | Gain |
| Chr15_CNVR_44 | Chr15 | 57215111 | 57226706 | 11596 | -1.988106  | 0.25207  | 0         | Loss | Gain |
| Chr15_CNVR_45 | Chr15 | 57289147 | 57298066 | 8920  | -0.9336969 | 0.523515 | 3.37E-196 | Loss | Gain |
| Chr15_CNVR_46 | Chr15 | 57300743 | 57316798 | 16056 | -0.8219158 | 0.56569  | 2.63E-283 | Loss | Gain |
| Chr15_CNVR_13 | Chr15 | 64541999 | 64566082 | 24084 | 1.207517   | 2.3094   | 0         | Gain | Loss |
| Chr15_CNVR_47 | Chr15 | 75503787 | 75514490 | 10704 | -0.8403276 | 0.558517 | 6.89E-197 | Loss | Gain |
| Chr15_CNVR_48 | Chr15 | 75774063 | 75783874 | 9812  | -0.8640889 | 0.549393 | 2.10E-189 | Loss | Gain |
| Chr15_CNVR_49 | Chr15 | 76438603 | 76447522 | 8920  | -1.012829  | 0.495574 | 4.64E-224 | Loss | Gain |
| Chr15_CNVR_50 | Chr15 | 76765967 | 76786482 | 20516 | -0.8625594 | 0.549976 | 0         | Loss | Gain |
| Chr15_CNVR_51 | Chr15 | 76797187 | 76807890 | 10704 | -0.9210625 | 0.52812  | 9.12E-230 | Loss | Gain |
| Chr15_CNVR_52 | Chr15 | 77168259 | 77179854 | 11596 | -0.8197826 | 0.566527 | 2.74E-204 | Loss | Gain |
| Chr15_CNVR_53 | Chr15 | 77185207 | 77195910 | 10704 | -0.9518653 | 0.516964 | 1.29E-242 | Loss | Gain |
| Chr15_CNVR_54 | Chr15 | 77197695 | 77224454 | 26760 | -0.9310219 | 0.524487 | 0         | Loss | Gain |
| Chr15_CNVR_55 | Chr15 | 77228915 | 77244078 | 15164 | -0.8971435 | 0.536949 | 0         | Loss | Gain |
| Chr15_CNVR_56 | Chr15 | 78375135 | 78387622 | 12488 | -0.9176837 | 0.529358 | 4.51E-266 | Loss | Gain |
| Chr15_CNVR_57 | Chr15 | 78393867 | 78408138 | 14272 | -0.9449439 | 0.51945  | 0         | Loss | Gain |
| Chr15_CNVR_58 | Chr15 | 78429547 | 78444710 | 15164 | -0.8948781 | 0.537793 | 0         | Loss | Gain |
| Chr15_CNVR_59 | Chr15 | 78931743 | 78942446 | 10704 | -0.7955371 | 0.576129 | 3.07E-179 | Loss | Gain |
| Chr15_CNVR_60 | Chr15 | 78944231 | 78953150 | 8920  | -0.8195688 | 0.566611 | 1.50E-157 | Loss | Gain |
| Chr15_CNVR_14 | Chr15 | 79379527 | 79389338 | 9812  | 1.493849   | 2.81639  | 0         | Gain | Loss |
| Chr15_CNVR_15 | Chr15 | 79524923 | 79541870 | 16948 | 1.619204   | 3.07205  | 0         | Gain | Loss |
| Chr15_CNVR_16 | Chr15 | 79816607 | 79833554 | 16948 | 1.270716   | 2.41281  | 0         | Gain | Loss |
| Chr15_CNVR_17 | Chr15 | 80070827 | 80079746 | 8920  | 1.422646   | 2.68077  | 0         | Gain | Loss |
| Chr15_CNVR_18 | Chr15 | 80808511 | 80842406 | 33896 | 1.412918   | 2.66275  | 0         | Gain | Loss |
| Chr15_CNVR_19 | Chr15 | 81300003 | 81308922 | 8920  | 1.065588   | 2.09302  | 1.56E-265 | Gain | Loss |
| Chr15_CNVR_61 | Chr15 | 81681779 | 81690698 | 8920  | -0.822116  | 0.565612 | 2.17E-158 | Loss | Gain |
| Chr15_CNVR_62 | Chr15 | 81695159 | 81707646 | 12488 | -0.8686893 | 0.547644 | 1.17E-242 | Loss | Gain |
| Chr15_CNVR_63 | Chr15 | 81729947 | 81739758 | 9812  | -0.8115766 | 0.569759 | 3.22E-170 | Loss | Gain |
| Chr15_CNVR_64 | Chr15 | 81781683 | 81802198 | 20516 | -0.9230323 | 0.527399 | 0         | Loss | Gain |
| Chr15_CNVR_65 | Chr15 | 81804875 | 81820930 | 16056 | -0.9844355 | 0.505423 | 0         | Loss | Gain |
| Chr15_CNVR_66 | Chr15 | 81822715 | 81839662 | 16948 | -1.029716  | 0.489807 | 0         | Loss | Gain |
| Chr15_CNVR_67 | Chr15 | 81849475 | 81868206 | 18732 | -1.135332  | 0.45523  | 0         | Loss | Gain |
| Chr15_CNVR_68 | Chr15 | 81869099 | 81929754 | 60656 | -2.465691  | 0.181031 | 0         | Loss | Gain |
| Chr15_CNVR_69 | Chr15 | 81934215 | 81944918 | 10704 | -1.07041   | 0.476184 | 3.13E-293 | Loss | Gain |
| Chr15_CNVR_70 | Chr15 | 81966327 | 81993086 | 26760 | -0.871585  | 0.546546 | 0         | Loss | Gain |
| Chr15_CNVR_71 | Chr15 | 81993979 | 82006466 | 12488 | -0.9452458 | 0.519341 | 1.85E-279 | Loss | Gain |
| Chr15_CNVR_72 | Chr15 | 82030551 | 82046606 | 16056 | -1.00167   | 0.499422 | 0         | Loss | Gain |
| Chr15_CNVR_73 | Chr15 | 82051959 | 82072474 | 20516 | -0.9073208 | 0.533174 | 0         | Loss | Gain |
| Chr15_CNVR_74 | Chr15 | 82105479 | 82116182 | 10704 | -0.8981054 | 0.536591 | 2.72E-220 | Loss | Gain |
| Chr15_CNVR_75 | Chr15 | 82159891 | 82168810 | 8920  | -0.8183535 | 0.567089 | 3.76E-157 | Loss | Gain |
| Chr15_CNVR_76 | Chr15 | 82185759 | 82194678 | 8920  | -0.9026429 | 0.534906 | 1.76E-185 | Loss | Gain |
| Chr15_CNVR_77 | Chr15 | 84955419 | 84965230 | 9812  | -0.8640751 | 0.549399 | 2.13E-189 | Loss | Gain |
| Chr15_CNVR_78 | Chr15 | 84996451 | 85007154 | 10704 | -0.9212239 | 0.528061 | 7.81E-230 | Loss | Gain |
| Chr15_CNVR_79 | Chr15 | 85024103 | 85066026 | 41924 | -1.030663  | 0.489485 | 0         | Loss | Gain |
| Chr15_CNVR_80 | Chr15 | 85074055 | 85091002 | 16948 | -0.9090599 | 0.532532 | 0         | Loss | Gain |
| Chr16_CNVR_10 | Chr16 | 39250    | 56890    | 17641 | -0.8552381 | 0.552774 | 0         | Loss | Gain |
| Chr16_CNVR_11 | Chr16 | 93052    | 102754   | 9703  | -0.8935805 | 0.538277 | 6.20E-200 | Loss | Gain |
| Chr16_CNVR_12 | Chr16 | 112456   | 128332   | 15877 | -0.8841163 | 0.541819 | 0         | Loss | Gain |
| Chr16_CNVR_13 | Chr16 | 160084   | 168904   | 8821  | -0.8485907 | 0.555327 | 7.96E-167 | Loss | Gain |
| Chr16_CNVR_14 | Chr16 | 1729162  | 1746802  | 17641 | -0.9613389 | 0.51358  | 0         | Loss | Gain |
| Chr16_CNVR_15 | Chr16 | 2589994  | 2601460  | 11467 | -0.8421563 | 0.557809 | 1.78E-213 | Loss | Gain |
| Chr16_CNVR_16 | Chr16 | 2603224  | 2612044  | 8821  | -0.9061781 | 0.533597 | 3.08E-186 | Loss | Gain |
| Chr16_CNVR_17 | Chr16 | 2616454  | 2630566  | 14113 | -0.9073381 | 0.533168 | 2.42E-297 | Loss | Gain |

|               |       |          |          |       |            |          |           |      |      |
|---------------|-------|----------|----------|-------|------------|----------|-----------|------|------|
| Chr16_CNVR_18 | Chr16 | 2634976  | 2644678  | 9703  | -0.9026719 | 0.534895 | 2.45E-203 | Loss | Gain |
| Chr16_CNVR_19 | Chr16 | 3075976  | 3087442  | 11467 | -0.8312549 | 0.56204  | 8.51E-209 | Loss | Gain |
| Chr16_CNVR_20 | Chr16 | 4144078  | 4154662  | 10585 | -0.9238438 | 0.527103 | 2.49E-230 | Loss | Gain |
| Chr16_CNVR_21 | Chr16 | 4179358  | 4189060  | 9703  | -0.8235384 | 0.565054 | 3.32E-174 | Loss | Gain |
| Chr16_CNVR_22 | Chr16 | 5628484  | 5638186  | 9703  | -1.742263  | 0.2989   | 0         | Loss | Gain |
| Chr16_CNVR_23 | Chr16 | 5702572  | 5712274  | 9703  | -0.9917078 | 0.502882 | 2.69E-237 | Loss | Gain |
| Chr16_CNVR_24 | Chr16 | 5740498  | 5750200  | 9703  | -0.9398474 | 0.521288 | 2.20E-217 | Loss | Gain |
| Chr16_CNVR_1  | Chr16 | 6027148  | 6042142  | 14995 | 1.139009   | 2.2023   | 0         | Gain | Loss |
| Chr16_CNVR_2  | Chr16 | 6057136  | 6094180  | 37045 | 1.204919   | 2.30524  | 0         | Gain | Loss |
| Chr16_CNVR_3  | Chr16 | 6097708  | 6119758  | 22051 | 1.265284   | 2.40375  | 0         | Gain | Loss |
| Chr16_CNVR_4  | Chr16 | 11523772 | 11533474 | 9703  | 3.092778   | 8.53137  | 0         | Gain | Loss |
| Chr16_CNVR_5  | Chr16 | 17787736 | 17801848 | 14113 | 0.8949017  | 1.85948  | 0         | Gain | Loss |
| Chr16_CNVR_6  | Chr16 | 29366632 | 29380744 | 14113 | 1.17956    | 2.26508  | 0         | Gain | Loss |
| Chr16_CNVR_7  | Chr16 | 29383390 | 29392210 | 8821  | 0.9441906  | 1.92411  | 1.13E-219 | Gain | Loss |
| Chr16_CNVR_8  | Chr16 | 29397502 | 29410732 | 13231 | 1.038425   | 2.05398  | 0         | Gain | Loss |
| Chr16_CNVR_25 | Chr16 | 30402100 | 30411802 | 9703  | -0.8362415 | 0.560101 | 8.39E-179 | Loss | Gain |
| Chr16_CNVR_9  | Chr16 | 39448774 | 39476998 | 28225 | 2.890846   | 7.41705  | 0         | Gain | Loss |
| Chr16_CNVR_26 | Chr16 | 43706188 | 43722946 | 16759 | -0.7971817 | 0.575472 | 4.42E-283 | Loss | Gain |
| Chr16_CNVR_27 | Chr16 | 43730002 | 43739704 | 9703  | -0.7822382 | 0.581464 | 1.71E-159 | Loss | Gain |
| Chr16_CNVR_28 | Chr16 | 43741468 | 43750288 | 8821  | -0.8004639 | 0.574165 | 4.87E-151 | Loss | Gain |
| Chr16_CNVR_29 | Chr16 | 43756462 | 43767046 | 10585 | -0.934006  | 0.523403 | 1.56E-234 | Loss | Gain |
| Chr16_CNVR_30 | Chr16 | 43770574 | 43784686 | 14113 | -0.9939119 | 0.502114 | 0         | Loss | Gain |
| Chr16_CNVR_31 | Chr16 | 43792624 | 43806736 | 14113 | -0.8619375 | 0.550213 | 8.78E-273 | Loss | Gain |
| Chr16_CNVR_32 | Chr16 | 43809382 | 43818202 | 8821  | -0.9758516 | 0.50844  | 2.38E-210 | Loss | Gain |
| Chr16_CNVR_33 | Chr16 | 44991262 | 45000082 | 8821  | -0.8536584 | 0.55338  | 1.64E-168 | Loss | Gain |
| Chr16_CNVR_34 | Chr16 | 47720170 | 47730754 | 10585 | -0.8706017 | 0.546919 | 1.33E-208 | Loss | Gain |
| Chr16_CNVR_35 | Chr16 | 47733400 | 47745748 | 12349 | -0.9627667 | 0.513072 | 3.10E-287 | Loss | Gain |
| Chr16_CNVR_36 | Chr16 | 47753686 | 47764270 | 10585 | -0.9549567 | 0.515857 | 3.03E-243 | Loss | Gain |
| Chr16_CNVR_37 | Chr16 | 47765152 | 47775736 | 10585 | -0.8580503 | 0.551698 | 1.47E-203 | Loss | Gain |
| Chr16_CNVR_38 | Chr16 | 47920384 | 47934496 | 14113 | -0.9234465 | 0.527248 | 3.58E-306 | Loss | Gain |
| Chr16_CNVR_39 | Chr16 | 47938906 | 47951254 | 12349 | -0.883666  | 0.541988 | 3.50E-249 | Loss | Gain |
| Chr16_CNVR_40 | Chr16 | 48082672 | 48091492 | 8821  | -0.827972  | 0.563321 | 5.21E-160 | Loss | Gain |
| Chr16_CNVR_41 | Chr16 | 48120598 | 48130300 | 9703  | -0.847943  | 0.555576 | 4.58E-183 | Loss | Gain |
| Chr16_CNVR_42 | Chr16 | 48131182 | 48142648 | 11467 | -0.851361  | 0.554262 | 1.90E-217 | Loss | Gain |
| Chr16_CNVR_43 | Chr16 | 49315708 | 49325410 | 9703  | -0.8918615 | 0.538918 | 2.72E-199 | Loss | Gain |
| Chr16_CNVR_44 | Chr16 | 49373920 | 49388032 | 14113 | -1.076713  | 0.474108 | 0         | Loss | Gain |
| Chr16_CNVR_45 | Chr16 | 49389796 | 49403026 | 13231 | -0.875908  | 0.544911 | 6.67E-263 | Loss | Gain |
| Chr16_CNVR_46 | Chr16 | 49416256 | 49425958 | 9703  | -1.034518  | 0.488179 | 5.81E-254 | Loss | Gain |
| Chr16_CNVR_47 | Chr16 | 49449772 | 49485052 | 35281 | -0.9846606 | 0.505345 | 0         | Loss | Gain |
| Chr16_CNVR_48 | Chr16 | 49485934 | 49511512 | 25579 | -0.9361379 | 0.52263  | 0         | Loss | Gain |
| Chr16_CNVR_49 | Chr16 | 49514158 | 49537090 | 22933 | -0.9315206 | 0.524305 | 0         | Loss | Gain |
| Chr16_CNVR_50 | Chr16 | 49539736 | 49555612 | 15877 | -0.9692776 | 0.510762 | 0         | Loss | Gain |
| Chr16_CNVR_51 | Chr16 | 49564432 | 49578544 | 14113 | -0.8779353 | 0.544146 | 2.23E-281 | Loss | Gain |
| Chr16_CNVR_52 | Chr16 | 49582072 | 49593538 | 11467 | -0.9590127 | 0.514409 | 3.59E-265 | Loss | Gain |
| Chr16_CNVR_53 | Chr16 | 49626172 | 49643812 | 17641 | -0.9967071 | 0.501143 | 0         | Loss | Gain |
| Chr16_CNVR_54 | Chr16 | 49661452 | 49670272 | 8821  | -0.9419387 | 0.520533 | 1.55E-198 | Loss | Gain |
| Chr16_CNVR_55 | Chr16 | 50629006 | 50651056 | 22051 | -0.9097732 | 0.532269 | 0         | Loss | Gain |
| Chr16_CNVR_56 | Chr16 | 50662522 | 50673106 | 10585 | -0.9310791 | 0.524466 | 2.55E-233 | Loss | Gain |
| Chr16_CNVR_57 | Chr16 | 50676634 | 50685454 | 8821  | -0.9868806 | 0.504568 | 3.22E-214 | Loss | Gain |
| Chr16_CNVR_58 | Chr16 | 50690746 | 50707504 | 16759 | -0.9200611 | 0.528487 | 0         | Loss | Gain |
| Chr16_CNVR_59 | Chr16 | 50718970 | 50731318 | 12349 | -0.9146762 | 0.530463 | 5.86E-264 | Loss | Gain |
| Chr16_CNVR_60 | Chr16 | 50732200 | 50746312 | 14113 | -1.060417  | 0.479493 | 0         | Loss | Gain |
| Chr16_CNVR_61 | Chr16 | 50753368 | 50791294 | 37927 | -0.9546438 | 0.515969 | 0         | Loss | Gain |
| Chr16_CNVR_62 | Chr16 | 50808934 | 50821282 | 12349 | -0.8616335 | 0.550329 | 8.24E-239 | Loss | Gain |
| Chr16_CNVR_63 | Chr16 | 50822164 | 50840686 | 18523 | -0.9702717 | 0.51041  | 0         | Loss | Gain |
| Chr16_CNVR_64 | Chr16 | 50841568 | 50853916 | 12349 | -0.8639426 | 0.549449 | 6.82E-240 | Loss | Gain |



|                |       |          |          |       |            |          |           |      |      |
|----------------|-------|----------|----------|-------|------------|----------|-----------|------|------|
| Chr16_CNVR_65  | Chr16 | 50861854 | 50876848 | 14995 | -0.9361516 | 0.522625 | 0         | Loss | Gain |
| Chr16_CNVR_66  | Chr16 | 50898016 | 50911246 | 13231 | -0.9545645 | 0.515997 | 2.59E-303 | Loss | Gain |
| Chr16_CNVR_67  | Chr16 | 50913010 | 50926240 | 13231 | -0.9838325 | 0.505635 | 0         | Loss | Gain |
| Chr16_CNVR_68  | Chr16 | 50931532 | 50943880 | 12349 | -0.8379277 | 0.559447 | 8.90E-228 | Loss | Gain |
| Chr16_CNVR_69  | Chr16 | 50945644 | 50958874 | 13231 | -0.9479504 | 0.518368 | 7.24E-300 | Loss | Gain |
| Chr16_CNVR_70  | Chr16 | 50995918 | 51006502 | 10585 | -0.9500925 | 0.517599 | 3.24E-241 | Loss | Gain |
| Chr16_CNVR_71  | Chr16 | 51053248 | 51067360 | 14113 | -0.9314637 | 0.524326 | 0         | Loss | Gain |
| Chr16_CNVR_72  | Chr16 | 51080590 | 51089410 | 8821  | -1.013081  | 0.495487 | 1.85E-223 | Loss | Gain |
| Chr16_CNVR_73  | Chr16 | 51099112 | 51123808 | 24697 | -0.9105121 | 0.531996 | 0         | Loss | Gain |
| Chr16_CNVR_74  | Chr16 | 51124690 | 51145858 | 21169 | -0.9720162 | 0.509793 | 0         | Loss | Gain |
| Chr16_CNVR_75  | Chr16 | 51147622 | 51167908 | 20287 | -0.9527107 | 0.516661 | 0         | Loss | Gain |
| Chr16_CNVR_76  | Chr16 | 51169672 | 51196132 | 26461 | -0.8870614 | 0.540714 | 0         | Loss | Gain |
| Chr16_CNVR_77  | Chr16 | 51197896 | 51220828 | 22933 | -0.9557865 | 0.51556  | 0         | Loss | Gain |
| Chr16_CNVR_78  | Chr16 | 51383116 | 51391936 | 8821  | -0.8663514 | 0.548532 | 9.34E-173 | Loss | Gain |
| Chr16_CNVR_79  | Chr16 | 51393700 | 51402520 | 8821  | -0.8601961 | 0.550878 | 1.08E-170 | Loss | Gain |
| Chr16_CNVR_80  | Chr16 | 51555106 | 51570100 | 14995 | -0.8957381 | 0.537472 | 0         | Loss | Gain |
| Chr16_CNVR_81  | Chr16 | 51571864 | 51614200 | 42337 | -0.9897015 | 0.503582 | 0         | Loss | Gain |
| Chr16_CNVR_82  | Chr16 | 51615082 | 51633604 | 18523 | -0.9479731 | 0.51836  | 0         | Loss | Gain |
| Chr16_CNVR_83  | Chr16 | 51642424 | 51651244 | 8821  | -0.9177663 | 0.529328 | 3.33E-190 | Loss | Gain |
| Chr16_CNVR_84  | Chr16 | 51662710 | 51688288 | 25579 | -0.8830051 | 0.542237 | 0         | Loss | Gain |
| Chr16_CNVR_85  | Chr16 | 51697990 | 51711220 | 13231 | -0.9055347 | 0.533835 | 5.70E-278 | Loss | Gain |
| Chr16_CNVR_86  | Chr16 | 51732388 | 51750910 | 18523 | -0.9151354 | 0.530294 | 0         | Loss | Gain |
| Chr16_CNVR_87  | Chr16 | 51769432 | 51791482 | 22051 | -0.932799  | 0.523841 | 0         | Loss | Gain |
| Chr16_CNVR_88  | Chr16 | 51793246 | 51818824 | 25579 | -0.9619145 | 0.513375 | 0         | Loss | Gain |
| Chr16_CNVR_89  | Chr16 | 51822352 | 51847048 | 24697 | -0.9337266 | 0.523504 | 0         | Loss | Gain |
| Chr16_CNVR_90  | Chr16 | 51863806 | 51873508 | 9703  | -0.9405161 | 0.521046 | 1.22E-217 | Loss | Gain |
| Chr16_CNVR_91  | Chr16 | 52362136 | 52375366 | 13231 | -0.8626962 | 0.549924 | 3.00E-256 | Loss | Gain |
| Chr16_CNVR_92  | Chr16 | 52432696 | 52455628 | 22933 | -0.8897655 | 0.539702 | 0         | Loss | Gain |
| Chr16_CNVR_93  | Chr16 | 52477678 | 52486498 | 8821  | -0.8751851 | 0.545184 | 1.00E-175 | Loss | Gain |
| Chr16_CNVR_94  | Chr16 | 52581754 | 52591456 | 9703  | -0.8458681 | 0.556376 | 2.62E-182 | Loss | Gain |
| Chr16_CNVR_95  | Chr16 | 52608214 | 52619680 | 11467 | -0.9093103 | 0.53244  | 7.18E-243 | Loss | Gain |
| Chr16_CNVR_96  | Chr16 | 52751980 | 52771384 | 19405 | -0.870786  | 0.546849 | 0         | Loss | Gain |
| Chr16_CNVR_97  | Chr16 | 52787260 | 52796080 | 8821  | -0.8722352 | 0.5463   | 9.87E-175 | Loss | Gain |
| Chr16_CNVR_98  | Chr16 | 53792740 | 53801560 | 8821  | -0.8524284 | 0.553852 | 4.21E-168 | Loss | Gain |
| Chr16_CNVR_99  | Chr16 | 55315954 | 55324774 | 8821  | -0.9874752 | 0.50436  | 1.99E-214 | Loss | Gain |
| Chr16_CNVR_100 | Chr16 | 55326538 | 55336240 | 9703  | -0.8463797 | 0.556179 | 1.71E-182 | Loss | Gain |
| Chr16_CNVR_101 | Chr16 | 70827688 | 70838272 | 10585 | -0.9733674 | 0.509316 | 5.95E-251 | Loss | Gain |
| Chr16_CNVR_102 | Chr16 | 70839154 | 70847974 | 8821  | -1.0025    | 0.499134 | 1.01E-219 | Loss | Gain |
| Chr16_CNVR_103 | Chr16 | 70856794 | 70869142 | 12349 | -0.971229  | 0.510071 | 2.26E-291 | Loss | Gain |
| Chr16_CNVR_104 | Chr16 | 70878844 | 70920298 | 41455 | -0.9993285 | 0.500233 | 0         | Loss | Gain |
| Chr16_CNVR_105 | Chr16 | 70937938 | 70976746 | 38809 | -0.9123963 | 0.531302 | 0         | Loss | Gain |
| Chr16_CNVR_106 | Chr16 | 70977628 | 70990858 | 13231 | -0.9391596 | 0.521537 | 2.67E-295 | Loss | Gain |
| Chr16_CNVR_107 | Chr16 | 70992622 | 71002324 | 9703  | -0.8807001 | 0.543104 | 3.89E-195 | Loss | Gain |
| Chr16_CNVR_108 | Chr16 | 71045542 | 71056126 | 10585 | -0.8778801 | 0.544166 | 1.52E-211 | Loss | Gain |
| Chr16_CNVR_109 | Chr16 | 71089642 | 71098462 | 8821  | -0.8918089 | 0.538938 | 2.40E-181 | Loss | Gain |
| Chr16_CNVR_110 | Chr16 | 71131096 | 71151382 | 20287 | -0.9148928 | 0.530383 | 0         | Loss | Gain |
| Chr16_CNVR_111 | Chr16 | 71153146 | 71161966 | 8821  | -0.9615148 | 0.513517 | 2.44E-205 | Loss | Gain |
| Chr16_CNVR_112 | Chr16 | 77075776 | 77084596 | 8821  | -0.884583  | 0.541644 | 6.75E-179 | Loss | Gain |
| Chr16_CNVR_113 | Chr16 | 77123404 | 77138398 | 14995 | -0.8451656 | 0.556647 | 3.35E-280 | Loss | Gain |
| Chr16_CNVR_114 | Chr16 | 77178088 | 77187790 | 9703  | -0.9375068 | 0.522134 | 1.71E-216 | Loss | Gain |
| Chr16_CNVR_115 | Chr16 | 77238946 | 77248648 | 9703  | -0.7841332 | 0.580701 | 3.69E-160 | Loss | Gain |
| Chr16_CNVR_116 | Chr16 | 81374644 | 81388756 | 14113 | -0.932399  | 0.523986 | 0         | Loss | Gain |
| Chr16_CNVR_117 | Chr16 | 81395812 | 81408160 | 12349 | -0.9959042 | 0.501422 | 1.70E-303 | Loss | Gain |
| Chr16_CNVR_118 | Chr16 | 81417862 | 81427564 | 9703  | -0.8965487 | 0.53717  | 4.82E-201 | Loss | Gain |
| Chr16_CNVR_119 | Chr16 | 81484894 | 81506062 | 21169 | -0.9808674 | 0.506675 | 0         | Loss | Gain |
| Chr16_CNVR_120 | Chr16 | 81528112 | 81554572 | 26461 | -0.901549  | 0.535312 | 0         | Loss | Gain |

|                |       |          |          |       |            |          |           |      |      |
|----------------|-------|----------|----------|-------|------------|----------|-----------|------|------|
| Chr16_CNVR_121 | Chr16 | 81569566 | 81583678 | 14113 | -1.001198  | 0.499585 | 0         | Loss | Gain |
| Chr16_CNVR_122 | Chr16 | 81587206 | 81602200 | 14995 | -0.9688596 | 0.51091  | 0         | Loss | Gain |
| Chr16_CNVR_123 | Chr16 | 81618076 | 81628660 | 10585 | -1.00514   | 0.498222 | 2.34E-264 | Loss | Gain |
| Chr16_CNVR_124 | Chr16 | 81629542 | 81651592 | 22051 | -0.9284927 | 0.525407 | 0         | Loss | Gain |
| Chr16_CNVR_125 | Chr16 | 81655120 | 81667468 | 12349 | -0.9502214 | 0.517553 | 4.00E-281 | Loss | Gain |
| Chr16_CNVR_126 | Chr16 | 81684226 | 81707158 | 22933 | -0.9604751 | 0.513888 | 0         | Loss | Gain |
| Chr17_CNVR_15  | Chr17 | 1986474  | 1995122  | 8649  | -0.9175202 | 0.529418 | 2.11E-190 | Loss | Gain |
| Chr17_CNVR_16  | Chr17 | 1996854  | 2005502  | 8649  | -0.8493574 | 0.555032 | 2.66E-167 | Loss | Gain |
| Chr17_CNVR_1   | Chr17 | 8807864  | 8818242  | 10379 | 1.289323   | 2.44413  | 0         | Gain | Loss |
| Chr17_CNVR_2   | Chr17 | 8848518  | 8866682  | 18165 | 1.394362   | 2.62872  | 0         | Gain | Loss |
| Chr17_CNVR_3   | Chr17 | 8896094  | 8905608  | 9515  | 1.117604   | 2.16986  | 0         | Gain | Loss |
| Chr17_CNVR_4   | Chr17 | 8914258  | 8926368  | 12111 | 1.035596   | 2.04996  | 0         | Gain | Loss |
| Chr17_CNVR_5   | Chr17 | 8927234  | 8942802  | 15569 | 1.063756   | 2.09037  | 0         | Gain | Loss |
| Chr17_CNVR_17  | Chr17 | 14332618 | 14350782 | 18165 | -1.793709  | 0.28843  | 0         | Loss | Gain |
| Chr17_CNVR_6   | Chr17 | 15323044 | 15332558 | 9515  | 2.948872   | 7.72145  | 0         | Gain | Loss |
| Chr17_CNVR_7   | Chr17 | 21002634 | 21013012 | 10379 | 0.9080636  | 1.87653  | 6.08E-245 | Gain | Loss |
| Chr17_CNVR_8   | Chr17 | 21083078 | 21096918 | 13841 | 3.894345   | 14.8701  | 0         | Gain | Loss |
| Chr17_CNVR_9   | Chr17 | 24686668 | 24696182 | 9515  | 0.8253167  | 1.77192  | 5.09E-190 | Gain | Loss |
| Chr17_CNVR_18  | Chr17 | 25030074 | 25044778 | 14705 | -0.8125109 | 0.56939  | 2.79E-262 | Loss | Gain |
| Chr17_CNVR_10  | Chr17 | 28279014 | 28287662 | 8649  | 1.668107   | 3.17797  | 0         | Gain | Loss |
| Chr17_CNVR_11  | Chr17 | 30044478 | 30053128 | 8651  | 0.7962126  | 1.73654  | 3.10E-162 | Gain | Loss |
| Chr17_CNVR_12  | Chr17 | 31412908 | 31425018 | 12111 | 0.8796339  | 1.83991  | 5.33E-270 | Gain | Loss |
| Chr17_CNVR_19  | Chr17 | 45646484 | 45655998 | 9515  | -0.9071081 | 0.533253 | 2.66E-205 | Loss | Gain |
| Chr17_CNVR_20  | Chr17 | 45662054 | 45681082 | 19029 | -0.8762046 | 0.544799 | 0         | Loss | Gain |
| Chr17_CNVR_21  | Chr17 | 45682814 | 45695788 | 12975 | -0.899235  | 0.536171 | 3.79E-275 | Loss | Gain |
| Chr17_CNVR_22  | Chr17 | 45696654 | 45711358 | 14705 | -0.913564  | 0.530872 | 0         | Loss | Gain |
| Chr17_CNVR_23  | Chr17 | 45712224 | 45722602 | 10379 | -0.8762576 | 0.544779 | 3.51E-211 | Loss | Gain |
| Chr17_CNVR_24  | Chr17 | 51371918 | 51397002 | 25085 | -1.039289  | 0.486567 | 0         | Loss | Gain |
| Chr17_CNVR_13  | Chr17 | 52440194 | 52450572 | 10379 | 4.868356   | 29.2093  | 0         | Gain | Loss |
| Chr17_CNVR_25  | Chr17 | 53467814 | 53482518 | 14705 | -0.8840186 | 0.541856 | 9.53E-303 | Loss | Gain |
| Chr17_CNVR_26  | Chr17 | 53533554 | 53543068 | 9515  | -0.940884  | 0.520914 | 4.09E-218 | Loss | Gain |
| Chr17_CNVR_27  | Chr17 | 53562098 | 53575072 | 12975 | -0.8858937 | 0.541152 | 2.44E-268 | Loss | Gain |
| Chr17_CNVR_28  | Chr17 | 53586318 | 53606212 | 19895 | -0.8420397 | 0.557854 | 0         | Loss | Gain |
| Chr17_CNVR_29  | Chr17 | 53625244 | 53636488 | 11245 | -1.033396  | 0.488559 | 9.55E-300 | Loss | Gain |
| Chr17_CNVR_30  | Chr17 | 53637354 | 53649462 | 12109 | -0.9447719 | 0.519512 | 6.56E-279 | Loss | Gain |
| Chr17_CNVR_31  | Chr17 | 53666764 | 53715202 | 48439 | -0.9259118 | 0.526348 | 0         | Loss | Gain |
| Chr17_CNVR_32  | Chr17 | 53718664 | 53727312 | 8649  | -0.8770178 | 0.544492 | 1.38E-176 | Loss | Gain |
| Chr17_CNVR_33  | Chr17 | 62943888 | 62957728 | 13841 | -0.9303643 | 0.524726 | 0         | Loss | Gain |
| Chr17_CNVR_34  | Chr17 | 62962918 | 62971568 | 8651  | -0.9466213 | 0.518846 | 1.80E-200 | Loss | Gain |
| Chr17_CNVR_35  | Chr17 | 62975028 | 63006168 | 31141 | -0.8843462 | 0.541733 | 0         | Loss | Gain |
| Chr17_CNVR_36  | Chr17 | 63013954 | 63024332 | 10379 | -0.8732998 | 0.545897 | 5.54E-210 | Loss | Gain |
| Chr17_CNVR_37  | Chr17 | 63026064 | 63038172 | 12109 | -0.7875656 | 0.579321 | 4.67E-205 | Loss | Gain |
| Chr17_CNVR_38  | Chr17 | 63122944 | 63131592 | 8649  | -0.8086503 | 0.570916 | 6.99E-154 | Loss | Gain |
| Chr17_CNVR_39  | Chr17 | 65640094 | 65648742 | 8649  | -0.9017593 | 0.535234 | 5.36E-185 | Loss | Gain |
| Chr17_CNVR_40  | Chr17 | 65691128 | 65703238 | 12111 | -0.8826871 | 0.542356 | 4.53E-249 | Loss | Gain |
| Chr17_CNVR_41  | Chr17 | 65710158 | 65718808 | 8651  | -0.8037478 | 0.572859 | 2.75E-152 | Loss | Gain |
| Chr17_CNVR_42  | Chr17 | 65840774 | 65854612 | 13839 | -0.854771  | 0.552953 | 2.57E-269 | Loss | Gain |
| Chr17_CNVR_43  | Chr17 | 65857208 | 65867588 | 10381 | -0.8698549 | 0.547202 | 1.37E-208 | Loss | Gain |
| Chr17_CNVR_44  | Chr17 | 65874508 | 65883158 | 8651  | -0.7861686 | 0.579882 | 1.32E-146 | Loss | Gain |
| Chr17_CNVR_45  | Chr17 | 65903918 | 65914298 | 10381 | -0.825772  | 0.56418  | 5.64E-191 | Loss | Gain |
| Chr17_CNVR_46  | Chr17 | 66812168 | 66820818 | 8651  | -0.8529196 | 0.553663 | 1.72E-168 | Loss | Gain |
| Chr17_CNVR_47  | Chr17 | 66854554 | 66864932 | 10379 | -0.856875  | 0.552147 | 2.32E-203 | Loss | Gain |
| Chr17_CNVR_48  | Chr17 | 67403828 | 67413342 | 9515  | -0.9298157 | 0.524925 | 6.75E-214 | Loss | Gain |
| Chr17_CNVR_49  | Chr17 | 67414208 | 67428912 | 14705 | -0.8713559 | 0.546633 | 1.79E-295 | Loss | Gain |
| Chr17_CNVR_50  | Chr17 | 67451404 | 67460052 | 8649  | -0.8955291 | 0.53755  | 7.17E-183 | Loss | Gain |
| Chr17_CNVR_51  | Chr17 | 67506764 | 67517142 | 10379 | -0.8563946 | 0.552331 | 3.61E-203 | Loss | Gain |

|                |       |          |          |       |            |          |           |      |      |
|----------------|-------|----------|----------|-------|------------|----------|-----------|------|------|
| Chr17_CNVR_52  | Chr17 | 69193514 | 69203028 | 9515  | -0.8380699 | 0.559391 | 1.06E-179 | Loss | Gain |
| Chr17_CNVR_53  | Chr17 | 69234168 | 69242818 | 8651  | -0.755927  | 0.592166 | 5.46E-137 | Loss | Gain |
| Chr17_CNVR_54  | Chr17 | 69356998 | 69369972 | 12975 | -0.9326285 | 0.523903 | 2.32E-292 | Loss | Gain |
| Chr17_CNVR_55  | Chr17 | 69395058 | 69409762 | 14705 | -0.908453  | 0.532756 | 0         | Loss | Gain |
| Chr17_CNVR_56  | Chr17 | 69414088 | 69423602 | 9515  | -0.8480896 | 0.55552  | 2.32E-183 | Loss | Gain |
| Chr17_CNVR_14  | Chr17 | 70111278 | 70120792 | 9515  | 1.468803   | 2.76792  | 0         | Gain | Loss |
| Chr17_CNVR_57  | Chr17 | 70947734 | 70958978 | 11245 | -0.876775  | 0.544583 | 7.86E-229 | Loss | Gain |
| Chr17_CNVR_58  | Chr17 | 70972818 | 70990118 | 17301 | -0.8888202 | 0.540056 | 0         | Loss | Gain |
| Chr17_CNVR_59  | Chr17 | 71003094 | 71012608 | 9515  | -1.10071   | 0.466287 | 1.46E-280 | Loss | Gain |
| Chr17_CNVR_60  | Chr17 | 71018664 | 71031638 | 12975 | -0.8671664 | 0.548223 | 7.52E-259 | Loss | Gain |
| Chr17_CNVR_61  | Chr17 | 71426078 | 71436458 | 10381 | -0.8500387 | 0.55477  | 1.27E-200 | Loss | Gain |
| Chr17_CNVR_62  | Chr17 | 71438188 | 71452028 | 13841 | -0.9494617 | 0.517826 | 0         | Loss | Gain |
| Chr17_CNVR_63  | Chr17 | 71459814 | 71471922 | 12109 | -0.9585612 | 0.51457  | 1.24E-285 | Loss | Gain |
| Chr17_CNVR_64  | Chr17 | 71477114 | 71488358 | 11245 | -0.90643   | 0.533504 | 6.06E-242 | Loss | Gain |
| Chr17_CNVR_65  | Chr17 | 71497008 | 71507388 | 10381 | -0.9026434 | 0.534906 | 6.09E-222 | Loss | Gain |
| Chr17_CNVR_66  | Chr17 | 71509984 | 71522958 | 12975 | -0.9253389 | 0.526557 | 1.39E-288 | Loss | Gain |
| Chr17_CNVR_67  | Chr17 | 71524688 | 71533338 | 8651  | -1.017434  | 0.493994 | 2.20E-225 | Loss | Gain |
| Chr17_CNVR_68  | Chr17 | 71569668 | 71580048 | 10381 | -0.8305192 | 0.562327 | 7.49E-193 | Loss | Gain |
| Chr17_CNVR_69  | Chr17 | 71586104 | 71597348 | 11245 | -0.858188  | 0.551645 | 1.05E-220 | Loss | Gain |
| Chr17_CNVR_70  | Chr17 | 72581718 | 72591232 | 9515  | -0.8504717 | 0.554603 | 3.10E-184 | Loss | Gain |
| Chr17_CNVR_71  | Chr17 | 72818728 | 72830838 | 12111 | -0.9097266 | 0.532286 | 5.68E-262 | Loss | Gain |
| Chr17_CNVR_72  | Chr17 | 72874088 | 72888792 | 14705 | -1.160004  | 0.447511 | 0         | Loss | Gain |
| Chr17_CNVR_73  | Chr17 | 72899174 | 72932908 | 33735 | -1.207194  | 0.43311  | 0         | Loss | Gain |
| Chr17_CNVR_74  | Chr17 | 72935504 | 72946748 | 11245 | -1.479551  | 0.3586   | 0         | Loss | Gain |
| Chr17_CNVR_75  | Chr17 | 73143968 | 73152618 | 8651  | -0.8629522 | 0.549826 | 7.53E-172 | Loss | Gain |
| Chr17_CNVR_76  | Chr17 | 73153484 | 73169052 | 15569 | -0.9594266 | 0.514261 | 0         | Loss | Gain |
| Chr17_CNVR_77  | Chr17 | 73195868 | 73207112 | 11245 | -0.9808083 | 0.506696 | 1.60E-275 | Loss | Gain |
| Chr17_CNVR_78  | Chr17 | 73207978 | 73222682 | 14705 | -1.074201  | 0.474934 | 0         | Loss | Gain |
| Chr17_CNVR_79  | Chr17 | 73240848 | 73249498 | 8651  | -1.023135  | 0.492046 | 2.06E-227 | Loss | Gain |
| Chr17_CNVR_80  | Chr17 | 73273718 | 73282368 | 8651  | -1.011232  | 0.496122 | 3.50E-223 | Loss | Gain |
| Chr17_CNVR_81  | Chr17 | 73300534 | 73318698 | 18165 | -0.8382185 | 0.559334 | 0         | Loss | Gain |
| Chr17_CNVR_82  | Chr17 | 73344648 | 73355892 | 11245 | -0.9673165 | 0.511457 | 2.29E-269 | Loss | Gain |
| Chr17_CNVR_83  | Chr17 | 73380978 | 73390492 | 9515  | -1.146575  | 0.451696 | 7.56E-299 | Loss | Gain |
| Chr17_CNVR_84  | Chr17 | 73393088 | 73410388 | 17301 | -0.8394455 | 0.558858 | 0         | Loss | Gain |
| Chr17_CNVR_85  | Chr17 | 73429418 | 73438068 | 8651  | -1.135747  | 0.455099 | 6.06E-268 | Loss | Gain |
| Chr17_CNVR_86  | Chr17 | 73440664 | 73453638 | 12975 | -1.110232  | 0.46322  | 0         | Loss | Gain |
| Chr17_CNVR_87  | Chr17 | 73487374 | 73505538 | 18165 | -0.9827197 | 0.506025 | 0         | Loss | Gain |
| Chr17_CNVR_88  | Chr17 | 73513324 | 73521972 | 8649  | -0.9626464 | 0.513115 | 4.64E-206 | Loss | Gain |
| Chr17_CNVR_89  | Chr17 | 73573008 | 73586848 | 13841 | -0.9844126 | 0.505431 | 0         | Loss | Gain |
| Chr17_CNVR_90  | Chr17 | 73588578 | 73614528 | 25951 | -0.9607678 | 0.513783 | 0         | Loss | Gain |
| Chr17_CNVR_91  | Chr17 | 73615394 | 73624908 | 9515  | -0.8788285 | 0.543809 | 1.03E-194 | Loss | Gain |
| Chr17_CNVR_92  | Chr17 | 73626638 | 73636152 | 9515  | -0.9291954 | 0.525151 | 1.16E-213 | Loss | Gain |
| Chr17_CNVR_93  | Chr17 | 73645668 | 73660372 | 14705 | -0.9407356 | 0.520967 | 0         | Loss | Gain |
| Chr17_CNVR_94  | Chr17 | 73661238 | 73669888 | 8651  | -0.8718817 | 0.546434 | 7.45E-175 | Loss | Gain |
| Chr17_CNVR_95  | Chr17 | 73694974 | 73712272 | 17299 | -1.036945  | 0.487358 | 0         | Loss | Gain |
| Chr17_CNVR_96  | Chr17 | 73713138 | 73753792 | 40655 | -1.052682  | 0.482071 | 0         | Loss | Gain |
| Chr17_CNVR_97  | Chr17 | 73754658 | 73778878 | 24221 | -1.169134  | 0.444688 | 0         | Loss | Gain |
| Chr17_CNVR_98  | Chr17 | 73779744 | 73822128 | 42385 | -1.077676  | 0.473791 | 0         | Loss | Gain |
| Chr17_CNVR_99  | Chr17 | 73826454 | 73846348 | 19895 | -0.9668344 | 0.511627 | 0         | Loss | Gain |
| Chr17_CNVR_100 | Chr17 | 73929388 | 73939768 | 10381 | -0.9158292 | 0.530039 | 2.30E-227 | Loss | Gain |
| Chr17_CNVR_101 | Chr17 | 73970908 | 73982152 | 11245 | -0.9165851 | 0.529761 | 1.79E-246 | Loss | Gain |
| Chr17_CNVR_102 | Chr17 | 74015024 | 74030592 | 15569 | -0.8756263 | 0.545017 | 0         | Loss | Gain |
| Chr17_CNVR_103 | Chr17 | 74040974 | 74079898 | 38925 | -0.9905754 | 0.503277 | 0         | Loss | Gain |
| Chr17_CNVR_104 | Chr17 | 74082494 | 74097198 | 14705 | -0.9944519 | 0.501927 | 0         | Loss | Gain |
| Chr17_CNVR_105 | Chr17 | 74106714 | 74156882 | 50169 | -1.012006  | 0.495856 | 0         | Loss | Gain |
| Chr17_CNVR_106 | Chr17 | 74159478 | 74170722 | 11245 | -1.011871  | 0.495903 | 8.64E-290 | Loss | Gain |

|                |       |          |          |        |            |           |           |      |      |
|----------------|-------|----------|----------|--------|------------|-----------|-----------|------|------|
| Chr17_CNVR_107 | Chr17 | 74184564 | 74200132 | 15569  | -1.111961  | 0.462665  | 0         | Loss | Gain |
| Chr17_CNVR_108 | Chr17 | 74221758 | 74239922 | 18165  | -1.057648  | 0.480415  | 0         | Loss | Gain |
| Chr17_CNVR_109 | Chr17 | 74241654 | 74260682 | 19029  | -1.114601  | 0.461819  | 0         | Loss | Gain |
| Chr17_CNVR_110 | Chr17 | 74265008 | 74280578 | 15571  | -1.001215  | 0.499579  | 0         | Loss | Gain |
| Chr17_CNVR_111 | Chr17 | 74282308 | 74309988 | 27681  | -1.012612  | 0.495648  | 0         | Loss | Gain |
| Chr17_CNVR_112 | Chr17 | 74311718 | 74329018 | 17301  | -1.044998  | 0.484646  | 0         | Loss | Gain |
| Chr17_CNVR_113 | Chr17 | 74329884 | 74341128 | 11245  | -0.9313656 | 0.524362  | 4.24E-253 | Loss | Gain |
| Chr17_CNVR_114 | Chr17 | 74341994 | 74359292 | 17299  | -0.8984435 | 0.536465  | 0         | Loss | Gain |
| Chr17_CNVR_115 | Chr17 | 74365348 | 74380052 | 14705  | -0.9307367 | 0.52459   | 0         | Loss | Gain |
| Chr17_CNVR_116 | Chr17 | 74380918 | 74396488 | 15571  | -0.904707  | 0.534141  | 0         | Loss | Gain |
| Chr17_CNVR_117 | Chr17 | 74445794 | 74457038 | 11245  | -1.035144  | 0.487967  | 1.48E-300 | Loss | Gain |
| Chr17_CNVR_118 | Chr17 | 74457904 | 74523642 | 65739  | -0.9753445 | 0.508618  | 0         | Loss | Gain |
| Chr17_CNVR_119 | Chr17 | 74525374 | 74538348 | 12975  | -1.099439  | 0.466698  | 0         | Loss | Gain |
| Chr17_CNVR_120 | Chr17 | 74539214 | 74548728 | 9515   | -0.9511371 | 0.517225  | 4.90E-222 | Loss | Gain |
| Chr17_CNVR_121 | Chr17 | 74553918 | 74577272 | 23355  | -1.008794  | 0.496962  | 0         | Loss | Gain |
| Chr17_CNVR_122 | Chr17 | 74578138 | 74613602 | 35465  | -1.00359   | 0.498757  | 0         | Loss | Gain |
| Chr17_CNVR_123 | Chr17 | 74616198 | 74628308 | 12111  | -0.9843297 | 0.505461  | 2.76E-298 | Loss | Gain |
| Chr17_CNVR_124 | Chr17 | 74666368 | 74684532 | 18165  | -0.9379539 | 0.521973  | 0         | Loss | Gain |
| Chr17_CNVR_125 | Chr17 | 74692318 | 74803038 | 110721 | -0.9977546 | 0.500779  | 0         | Loss | Gain |
| Chr17_CNVR_126 | Chr17 | 74823798 | 74834178 | 10381  | -1.126851  | 0.457914  | 0         | Loss | Gain |
| Chr17_CNVR_127 | Chr17 | 74835908 | 74872238 | 36331  | -0.9606105 | 0.513839  | 0         | Loss | Gain |
| Chr17_CNVR_128 | Chr17 | 74873104 | 74894728 | 21625  | -1.041699  | 0.485755  | 0         | Loss | Gain |
| Chr17_CNVR_129 | Chr17 | 74898188 | 74909432 | 11245  | -1.058376  | 0.480172  | 0         | Loss | Gain |
| Chr17_CNVR_130 | Chr17 | 74910298 | 74944898 | 34601  | -1.116752  | 0.461131  | 0         | Loss | Gain |
| Chr17_CNVR_131 | Chr17 | 74946628 | 75005448 | 58821  | -1.083973  | 0.471728  | 0         | Loss | Gain |
| Chr17_CNVR_132 | Chr17 | 75046104 | 75054752 | 8649   | -1.001121  | 0.499612  | 1.34E-219 | Loss | Gain |
| Chr17_CNVR_133 | Chr17 | 75056484 | 75078972 | 22489  | -1.061435  | 0.479155  | 0         | Loss | Gain |
| Chr17_CNVR_134 | Chr17 | 75079838 | 75101462 | 21625  | -1.023618  | 0.491881  | 0         | Loss | Gain |
| Chr17_CNVR_135 | Chr17 | 75102328 | 75110978 | 8651   | -0.9609134 | 0.513732  | 1.87E-205 | Loss | Gain |
| Chr17_CNVR_136 | Chr17 | 75111844 | 75136928 | 25085  | -0.9916427 | 0.502905  | 0         | Loss | Gain |
| Chr18_CNVR_1   | Chr18 | 669296   | 678755   | 9460   | 1.304962   | 2.47077   | 0         | Gain | Loss |
| Chr18_CNVR_14  | Chr18 | 11395990 | 11405449 | 9460   | -0.8692609 | 0.547427  | 5.39E-173 | Loss | Gain |
| Chr18_CNVR_15  | Chr18 | 11409234 | 11422477 | 13244  | -0.9127216 | 0.531182  | 1.39E-261 | Loss | Gain |
| Chr18_CNVR_16  | Chr18 | 11429100 | 11442343 | 13244  | -1.954069  | 0.258087  | 0         | Loss | Gain |
| Chr18_CNVR_17  | Chr18 | 11477346 | 11488697 | 11352  | -0.9171927 | 0.529538  | 2.56E-226 | Loss | Gain |
| Chr18_CNVR_18  | Chr18 | 11512348 | 11521807 | 9460   | -0.8141443 | 0.568746  | 4.53E-155 | Loss | Gain |
| Chr18_CNVR_19  | Chr18 | 11558702 | 11569107 | 10406  | -0.8759254 | 0.544904  | 1.66E-192 | Loss | Gain |
| Chr18_CNVR_20  | Chr18 | 13702338 | 13711797 | 9460   | -0.7762247 | 0.583893  | 4.82E-143 | Loss | Gain |
| Chr18_CNVR_21  | Chr18 | 13978570 | 13988975 | 10406  | -0.8203767 | 0.566294  | 1.42E-172 | Loss | Gain |
| Chr18_CNVR_22  | Chr18 | 14098712 | 14109117 | 10406  | -0.8554788 | 0.552682  | 4.15E-185 | Loss | Gain |
| Chr18_CNVR_23  | Chr18 | 14137498 | 14146957 | 9460   | -0.8365768 | 0.559971  | 2.63E-162 | Loss | Gain |
| Chr18_CNVR_2   | Chr18 | 16107070 | 16116529 | 9460   | 0.8025635  | 1.7442    | 4.12E-176 | Gain | Loss |
| Chr18_CNVR_3   | Chr18 | 21791584 | 21804827 | 13244  | 1.159011   | 2.23304   | 0         | Gain | Loss |
| Chr18_CNVR_4   | Chr18 | 31858916 | 31868375 | 9460   | 0.8414738  | 1.79188   | 7.45E-192 | Gain | Loss |
| Chr18_CNVR_5   | Chr18 | 36845282 | 36855687 | 10406  | 0.9250435  | 1.89874   | 1.35E-249 | Gain | Loss |
| Chr18_CNVR_6   | Chr18 | 36876500 | 36888797 | 12298  | 0.8462121  | 1.79777   | 2.61E-251 | Gain | Loss |
| Chr18_CNVR_24  | Chr18 | 43809734 | 43833383 | 23650  | -1.916065  | 0.264976  | 0         | Loss | Gain |
| Chr18_CNVR_25  | Chr18 | 51751404 | 51781675 | 30272  | -1.329342  | 0.39795   | 0         | Loss | Gain |
| Chr18_CNVR_26  | Chr18 | 56670604 | 56681955 | 11352  | -0.8412989 | 0.558141  | 3.40E-196 | Loss | Gain |
| Chr18_CNVR_7   | Chr18 | 57604306 | 57707419 | 103114 | 1.221442   | 2.3318    | 0         | Gain | Loss |
| Chr18_CNVR_8   | Chr18 | 58468004 | 58485977 | 17974  | 1.427596   | 2.68998   | 0         | Gain | Loss |
| Chr18_CNVR_9   | Chr18 | 58488816 | 58499221 | 10406  | 0.8405824  | 1.79077   | 1.98E-210 | Gain | Loss |
| Chr18_CNVR_10  | Chr18 | 58565442 | 58581523 | 16082  | 1.404098   | 2.64652   | 0         | Gain | Loss |
| Chr18_CNVR_11  | Chr18 | 61447904 | 61463985 | 16082  | 4.522634   | 22.9852   | 0         | Gain | Loss |
| Chr18_CNVR_27  | Chr18 | 61543450 | 61552909 | 9460   | -0.8527942 | 0.553711  | 1.37E-167 | Loss | Gain |
| Chr18_CNVR_28  | Chr18 | 61652240 | 61691971 | 39732  | -4.241759  | 0.0528571 | 0         | Loss | Gain |

|               |       |           |           |       |            |           |           |      |      |
|---------------|-------|-----------|-----------|-------|------------|-----------|-----------|------|------|
| Chr18_CNVR_12 | Chr18 | 61703324  | 61719405  | 16082 | 2.705465   | 6.52268   | 0         | Gain | Loss |
| Chr18_CNVR_13 | Chr18 | 61758192  | 61770489  | 12298 | 3.250822   | 9.51908   | 0         | Gain | Loss |
| Chr18_CNVR_29 | Chr18 | 61774274  | 61784679  | 10406 | -0.8930742 | 0.538465  | 9.21E-199 | Loss | Gain |
| Chr18_CNVR_30 | Chr18 | 61791302  | 61814005  | 22704 | -0.8824755 | 0.542436  | 0         | Loss | Gain |
| Chr18_CNVR_31 | Chr18 | 61872658  | 61884009  | 11352 | -0.9890613 | 0.503805  | 1.25E-255 | Loss | Gain |
| Chr18_CNVR_32 | Chr18 | 61891578  | 61901037  | 9460  | -0.9957791 | 0.501465  | 1.09E-215 | Loss | Gain |
| Chr18_CNVR_33 | Chr18 | 61902930  | 61914281  | 11352 | -0.8937861 | 0.5382    | 6.33E-217 | Loss | Gain |
| Chr18_CNVR_34 | Chr18 | 62474314  | 62485665  | 11352 | -0.8754723 | 0.545075  | 1.23E-209 | Loss | Gain |
| Chr18_CNVR_35 | Chr18 | 63215032  | 63229221  | 14190 | -1.593185  | 0.331439  | 0         | Loss | Gain |
| Chr18_CNVR_36 | Chr18 | 63255710  | 63275575  | 19866 | -1.7797    | 0.291244  | 0         | Loss | Gain |
| Chr18_CNVR_37 | Chr18 | 63303010  | 63329497  | 26488 | -2.369172  | 0.193557  | 0         | Loss | Gain |
| Chr18_CNVR_38 | Chr18 | 63331390  | 63352201  | 20812 | -2.027608  | 0.245261  | 0         | Loss | Gain |
| Chr18_CNVR_39 | Chr18 | 63776010  | 63786415  | 10406 | -1.128933  | 0.457254  | 4.30E-288 | Loss | Gain |
| Chr19_CNVR_1  | Chr19 | 275426    | 285963    | 10538 | 0.8177798  | 1.76269   | 9.90E-203 | Gain | Loss |
| Chr19_CNVR_2  | Chr19 | 1594592   | 1604171   | 9580  | 0.8589534  | 1.81372   | 1.27E-201 | Gain | Loss |
| Chr19_CNVR_3  | Chr19 | 1866664   | 1876243   | 9580  | 1.396523   | 2.63266   | 0         | Gain | Loss |
| Chr19_CNVR_4  | Chr19 | 2388774   | 2399311   | 10538 | 0.9291733  | 1.90418   | 6.39E-255 | Gain | Loss |
| Chr19_CNVR_5  | Chr19 | 2545886   | 2558339   | 12454 | 0.871699   | 1.82982   | 1.69E-268 | Gain | Loss |
| Chr19_CNVR_6  | Chr19 | 2876396   | 2895555   | 19160 | 1.087815   | 2.12552   | 0         | Gain | Loss |
| Chr19_CNVR_7  | Chr19 | 18515746  | 18525325  | 9580  | 0.8427763  | 1.7935    | 7.87E-195 | Gain | Loss |
| Chr19_CNVR_8  | Chr19 | 18532990  | 18543527  | 10538 | 0.841087   | 1.7914    | 2.50E-213 | Gain | Loss |
| Chr19_CNVR_9  | Chr19 | 19074260  | 19085755  | 11496 | 1.066384   | 2.09418   | 0         | Gain | Loss |
| Chr19_CNVR_10 | Chr19 | 19123118  | 19132697  | 9580  | 0.977263   | 1.96873   | 2.10E-253 | Gain | Loss |
| Chr19_CNVR_11 | Chr19 | 19796592  | 19871315  | 74724 | 1.548484   | 2.9251    | 0         | Gain | Loss |
| Chr19_CNVR_12 | Chr19 | 19877064  | 19889517  | 12454 | 1.108945   | 2.15688   | 0         | Gain | Loss |
| Chr19_CNVR_13 | Chr19 | 19906762  | 19917299  | 10538 | 1.07448    | 2.10596   | 0         | Gain | Loss |
| Chr19_CNVR_14 | Chr19 | 24617248  | 24635449  | 18202 | 0.9671348  | 1.95495   | 0         | Gain | Loss |
| Chr19_CNVR_15 | Chr19 | 24769570  | 24784897  | 15328 | 1.2236     | 2.33529   | 0         | Gain | Loss |
| Chr19_CNVR_19 | Chr19 | 35274998  | 35292241  | 17244 | -0.8518913 | 0.554058  | 3.09E-299 | Loss | Gain |
| Chr19_CNVR_20 | Chr19 | 35296074  | 35305653  | 9580  | -0.826817  | 0.563772  | 4.64E-159 | Loss | Gain |
| Chr19_CNVR_21 | Chr19 | 35309486  | 35319065  | 9580  | -0.8125132 | 0.569389  | 1.79E-154 | Loss | Gain |
| Chr19_CNVR_16 | Chr19 | 38845464  | 38855043  | 9580  | 0.9169749  | 1.88815   | 1.40E-226 | Gain | Loss |
| Chr19_CNVR_22 | Chr19 | 43915200  | 43927653  | 12454 | -1.337475  | 0.395713  | 0         | Loss | Gain |
| Chr19_CNVR_17 | Chr19 | 51063796  | 51074333  | 10538 | 0.8524128  | 1.80552   | 1.52E-218 | Gain | Loss |
| Chr19_CNVR_23 | Chr19 | 51860852  | 51870431  | 9580  | -0.7870094 | 0.579544  | 2.18E-146 | Loss | Gain |
| Chr19_CNVR_18 | Chr19 | 52133882  | 52146335  | 12454 | 1.295331   | 2.45433   | 0         | Gain | Loss |
| Chr19_CNVR_24 | Chr19 | 54383266  | 54392845  | 9580  | -0.8239974 | 0.564875  | 3.75E-158 | Loss | Gain |
| Chr19_CNVR_25 | Chr19 | 57803326  | 57815779  | 12454 | -0.8960083 | 0.537371  | 1.43E-235 | Loss | Gain |
| Chr2_CNVR_7   | Chr2  | 40270     | 64518     | 24249 | -0.919146  | 0.528822  | 0         | Loss | Gain |
| Chr2_CNVR_8   | Chr2  | 85302     | 150252    | 64951 | -1.587982  | 0.332636  | 0         | Loss | Gain |
| Chr2_CNVR_9   | Chr2  | 4807600   | 4817126   | 9527  | -0.8431551 | 0.557423  | 6.08E-182 | Loss | Gain |
| Chr2_CNVR_10  | Chr2  | 5379160   | 5393016   | 13857 | -0.9156801 | 0.530094  | 2.21E-303 | Loss | Gain |
| Chr2_CNVR_1   | Chr2  | 56706980  | 56716506  | 9527  | 0.9648717  | 1.95189   | 1.09E-239 | Gain | Loss |
| Chr2_CNVR_2   | Chr2  | 57408440  | 57417100  | 8661  | 1.211921   | 2.31646   | 0         | Gain | Loss |
| Chr2_CNVR_11  | Chr2  | 63493822  | 63505946  | 12125 | -1.172078  | 0.443782  | 0         | Loss | Gain |
| Chr2_CNVR_12  | Chr2  | 72515810  | 72524470  | 8661  | -0.8593083 | 0.551217  | 4.86E-171 | Loss | Gain |
| Chr2_CNVR_13  | Chr2  | 72966996  | 72975656  | 8661  | -0.8318009 | 0.561827  | 8.69E-162 | Loss | Gain |
| Chr2_CNVR_14  | Chr2  | 72993842  | 73002502  | 8661  | -0.7890473 | 0.578726  | 1.06E-147 | Loss | Gain |
| Chr2_CNVR_15  | Chr2  | 73112484  | 73132402  | 19919 | -0.8058909 | 0.572009  | 0         | Loss | Gain |
| Chr2_CNVR_16  | Chr2  | 83461184  | 83471576  | 10393 | -3.999869  | 0.0625057 | 0         | Loss | Gain |
| Chr2_CNVR_17  | Chr2  | 100640026 | 100653016 | 12991 | -1.362976  | 0.388779  | 0         | Loss | Gain |
| Chr2_CNVR_18  | Chr2  | 104880828 | 104889488 | 8661  | -0.8238842 | 0.564919  | 3.76E-159 | Loss | Gain |
| Chr2_CNVR_19  | Chr2  | 104901612 | 104911138 | 9527  | -0.8495075 | 0.554974  | 2.71E-184 | Loss | Gain |
| Chr2_CNVR_20  | Chr2  | 104945778 | 104957036 | 11259 | -0.9365625 | 0.522476  | 2.16E-256 | Loss | Gain |
| Chr2_CNVR_21  | Chr2  | 104970026 | 104981284 | 11259 | -1.023977  | 0.491759  | 6.73E-297 | Loss | Gain |
| Chr2_CNVR_22  | Chr2  | 104983016 | 104994274 | 11259 | -0.9826678 | 0.506043  | 1.30E-277 | Loss | Gain |

|              |      |           |           |       |            |          |           |      |      |
|--------------|------|-----------|-----------|-------|------------|----------|-----------|------|------|
| Chr2_CNVR_23 | Chr2 | 104995140 | 105006398 | 11259 | -0.9180807 | 0.529213 | 5.46E-248 | Loss | Gain |
| Chr2_CNVR_24 | Chr2 | 105374448 | 105385706 | 11259 | -0.8721367 | 0.546337 | 2.14E-227 | Loss | Gain |
| Chr2_CNVR_25 | Chr2 | 106624086 | 106633612 | 9527  | -0.8348086 | 0.560657 | 7.25E-179 | Loss | Gain |
| Chr2_CNVR_26 | Chr2 | 106659592 | 106668252 | 8661  | -1.030414  | 0.48957  | 3.31E-231 | Loss | Gain |
| Chr2_CNVR_27 | Chr2 | 106674314 | 106694232 | 19919 | -0.9266033 | 0.526096 | 0         | Loss | Gain |
| Chr2_CNVR_28 | Chr2 | 106704624 | 106715016 | 10393 | -0.9189943 | 0.528878 | 1.85E-229 | Loss | Gain |
| Chr2_CNVR_29 | Chr2 | 106716748 | 106759182 | 42435 | -0.9406257 | 0.521007 | 0         | Loss | Gain |
| Chr2_CNVR_30 | Chr2 | 106815472 | 106837988 | 22517 | -0.8444351 | 0.556929 | 0         | Loss | Gain |
| Chr2_CNVR_31 | Chr2 | 106838854 | 106848380 | 9527  | -0.9129895 | 0.531083 | 3.26E-208 | Loss | Gain |
| Chr2_CNVR_32 | Chr2 | 106857040 | 106870896 | 13857 | -0.8607851 | 0.550653 | 3.33E-273 | Loss | Gain |
| Chr2_CNVR_33 | Chr2 | 106871762 | 106881288 | 9527  | -0.8316433 | 0.561889 | 1.05E-177 | Loss | Gain |
| Chr2_CNVR_34 | Chr2 | 107114242 | 107126366 | 12125 | -0.808305  | 0.571052 | 8.95E-215 | Loss | Gain |
| Chr2_CNVR_35 | Chr2 | 107542912 | 107551572 | 8661  | -0.8413603 | 0.558117 | 5.49E-165 | Loss | Gain |
| Chr2_CNVR_36 | Chr2 | 107650296 | 107671946 | 21651 | -0.8624715 | 0.55001  | 0         | Loss | Gain |
| Chr2_CNVR_37 | Chr2 | 107947334 | 107955994 | 8661  | -0.7892028 | 0.578664 | 9.40E-148 | Loss | Gain |
| Chr2_CNVR_38 | Chr2 | 108072904 | 108086760 | 13857 | -0.8460695 | 0.556298 | 2.97E-265 | Loss | Gain |
| Chr2_CNVR_39 | Chr2 | 108096286 | 108112740 | 16455 | -0.911194  | 0.531745 | 0         | Loss | Gain |
| Chr2_CNVR_40 | Chr2 | 108113606 | 108143050 | 29445 | -0.9103062 | 0.532072 | 0         | Loss | Gain |
| Chr2_CNVR_41 | Chr2 | 108143916 | 108191546 | 47631 | -1.028389  | 0.490257 | 0         | Loss | Gain |
| Chr2_CNVR_42 | Chr2 | 108201938 | 108217526 | 15589 | -0.9139419 | 0.530733 | 0         | Loss | Gain |
| Chr2_CNVR_43 | Chr2 | 108220124 | 108233114 | 12991 | -0.8711858 | 0.546697 | 1.45E-261 | Loss | Gain |
| Chr2_CNVR_44 | Chr2 | 108281610 | 108290270 | 8661  | -0.7742297 | 0.584701 | 6.53E-143 | Loss | Gain |
| Chr2_CNVR_45 | Chr2 | 110788680 | 110797340 | 8661  | -0.9809441 | 0.506648 | 2.01E-213 | Loss | Gain |
| Chr2_CNVR_46 | Chr2 | 120171790 | 120181316 | 9527  | -0.8494849 | 0.554983 | 2.76E-184 | Loss | Gain |
| Chr2_CNVR_47 | Chr2 | 120197770 | 120209028 | 11259 | -0.9682888 | 0.511112 | 5.88E-271 | Loss | Gain |
| Chr2_CNVR_48 | Chr2 | 120210760 | 120219420 | 8661  | -0.8757517 | 0.54497  | 1.23E-176 | Loss | Gain |
| Chr2_CNVR_49 | Chr2 | 120780588 | 120789248 | 8661  | -0.8872602 | 0.54064  | 1.40E-180 | Loss | Gain |
| Chr2_CNVR_50 | Chr2 | 120855930 | 120873250 | 17321 | -0.8905882 | 0.539394 | 0         | Loss | Gain |
| Chr2_CNVR_51 | Chr2 | 120904426 | 120924344 | 19919 | -0.9311306 | 0.524447 | 0         | Loss | Gain |
| Chr2_CNVR_52 | Chr2 | 120934736 | 120949458 | 14723 | -0.9127735 | 0.531163 | 0         | Loss | Gain |
| Chr2_CNVR_53 | Chr2 | 120960716 | 120978036 | 17321 | -0.9404063 | 0.521086 | 0         | Loss | Gain |
| Chr2_CNVR_54 | Chr2 | 120978902 | 120988428 | 9527  | -0.8606162 | 0.550717 | 2.00E-188 | Loss | Gain |
| Chr2_CNVR_55 | Chr2 | 122486608 | 122498732 | 12125 | -0.8143211 | 0.568676 | 1.50E-217 | Loss | Gain |
| Chr2_CNVR_56 | Chr2 | 122500464 | 122517784 | 17321 | -0.9735952 | 0.509235 | 0         | Loss | Gain |
| Chr2_CNVR_57 | Chr2 | 122523846 | 122544630 | 20785 | -0.8852842 | 0.541381 | 0         | Loss | Gain |
| Chr2_CNVR_58 | Chr2 | 122545496 | 122555022 | 9527  | -0.8917096 | 0.538975 | 4.10E-200 | Loss | Gain |
| Chr2_CNVR_59 | Chr2 | 122555888 | 122574940 | 19053 | -0.9215351 | 0.527947 | 0         | Loss | Gain |
| Chr2_CNVR_60 | Chr2 | 122584466 | 122593992 | 9527  | -0.8361172 | 0.560149 | 2.39E-179 | Loss | Gain |
| Chr2_CNVR_61 | Chr2 | 122598322 | 122612178 | 13857 | -0.8599549 | 0.55097  | 9.40E-273 | Loss | Gain |
| Chr2_CNVR_62 | Chr2 | 123255616 | 123275534 | 19919 | -0.8128634 | 0.569251 | 0         | Loss | Gain |
| Chr2_CNVR_63 | Chr2 | 123285060 | 123298050 | 12991 | -0.8942229 | 0.538037 | 2.07E-273 | Loss | Gain |
| Chr2_CNVR_64 | Chr2 | 123299782 | 123310174 | 10393 | -0.8036972 | 0.572879 | 1.42E-182 | Loss | Gain |
| Chr2_CNVR_65 | Chr2 | 123344814 | 123363000 | 18187 | -0.9019152 | 0.535176 | 0         | Loss | Gain |
| Chr2_CNVR_66 | Chr2 | 123399372 | 123410630 | 11259 | -0.8426114 | 0.557633 | 2.09E-214 | Loss | Gain |
| Chr2_CNVR_3  | Chr2 | 124333786 | 124344178 | 10393 | 0.9023204  | 1.86907  | 4.52E-233 | Gain | Loss |
| Chr2_CNVR_4  | Chr2 | 124371024 | 124381416 | 10393 | 0.8633748  | 1.81929  | 6.11E-216 | Gain | Loss |
| Chr2_CNVR_67 | Chr2 | 124816148 | 124827406 | 11259 | -0.944862  | 0.519479 | 3.48E-260 | Loss | Gain |
| Chr2_CNVR_68 | Chr2 | 126269296 | 126280554 | 11259 | -0.8198041 | 0.566519 | 1.62E-204 | Loss | Gain |
| Chr2_CNVR_69 | Chr2 | 126281420 | 126290946 | 9527  | -0.8941446 | 0.538066 | 4.90E-201 | Loss | Gain |
| Chr2_CNVR_70 | Chr2 | 126291812 | 126301338 | 9527  | -0.8782499 | 0.544027 | 4.95E-195 | Loss | Gain |
| Chr2_CNVR_71 | Chr2 | 126303936 | 126313462 | 9527  | -1.052172  | 0.482242 | 8.47E-263 | Loss | Gain |
| Chr2_CNVR_72 | Chr2 | 126314328 | 126326452 | 12125 | -0.9258214 | 0.526381 | 1.11E-270 | Loss | Gain |
| Chr2_CNVR_73 | Chr2 | 126327318 | 126335978 | 8661  | -0.9145696 | 0.530502 | 5.04E-190 | Loss | Gain |
| Chr2_CNVR_74 | Chr2 | 126346370 | 126355896 | 9527  | -0.9658794 | 0.511966 | 1.17E-228 | Loss | Gain |
| Chr2_CNVR_75 | Chr2 | 126510910 | 126527364 | 16455 | -0.916385  | 0.529835 | 0         | Loss | Gain |
| Chr2_CNVR_76 | Chr2 | 126529962 | 126542952 | 12991 | -0.8835612 | 0.542028 | 6.53E-268 | Loss | Gain |

|               |      |           |           |       |            |          |           |      |      |
|---------------|------|-----------|-----------|-------|------------|----------|-----------|------|------|
| Chr2_CNVR_77  | Chr2 | 126802752 | 126814010 | 11259 | -0.8815684 | 0.542777 | 1.38E-231 | Loss | Gain |
| Chr2_CNVR_78  | Chr2 | 126930054 | 126938714 | 8661  | -0.857548  | 0.55189  | 1.92E-170 | Loss | Gain |
| Chr2_CNVR_79  | Chr2 | 127849746 | 127858406 | 8661  | -0.7869706 | 0.57956  | 4.99E-147 | Loss | Gain |
| Chr2_CNVR_80  | Chr2 | 127880056 | 127897376 | 17321 | -0.9384793 | 0.521783 | 0         | Loss | Gain |
| Chr2_CNVR_81  | Chr2 | 127899108 | 127913830 | 14723 | -0.9381529 | 0.521901 | 0         | Loss | Gain |
| Chr2_CNVR_82  | Chr2 | 127914696 | 127925954 | 11259 | -0.8562351 | 0.552392 | 2.25E-220 | Loss | Gain |
| Chr2_CNVR_83  | Chr2 | 128057586 | 128067112 | 9527  | -0.8710276 | 0.546757 | 2.56E-192 | Loss | Gain |
| Chr2_CNVR_84  | Chr2 | 128078370 | 128093958 | 15589 | -0.8941711 | 0.538056 | 0         | Loss | Gain |
| Chr2_CNVR_85  | Chr2 | 128493184 | 128502710 | 9527  | -0.821384  | 0.565899 | 5.99E-174 | Loss | Gain |
| Chr2_CNVR_86  | Chr2 | 128550340 | 128560732 | 10393 | -0.9014716 | 0.53534  | 3.71E-222 | Loss | Gain |
| Chr2_CNVR_87  | Chr2 | 128566794 | 128577186 | 10393 | -0.8550821 | 0.552834 | 4.07E-203 | Loss | Gain |
| Chr2_CNVR_88  | Chr2 | 128584980 | 128601434 | 16455 | -0.9576196 | 0.514906 | 0         | Loss | Gain |
| Chr2_CNVR_89  | Chr2 | 128611826 | 128621352 | 9527  | -0.8914478 | 0.539073 | 5.15E-200 | Loss | Gain |
| Chr2_CNVR_90  | Chr2 | 128639538 | 128649930 | 10393 | -0.9631388 | 0.51294  | 4.37E-248 | Loss | Gain |
| Chr2_CNVR_91  | Chr2 | 128651662 | 128661188 | 9527  | -0.8909067 | 0.539275 | 8.26E-200 | Loss | Gain |
| Chr2_CNVR_92  | Chr2 | 129169530 | 129179056 | 9527  | -0.8562515 | 0.552386 | 8.47E-187 | Loss | Gain |
| Chr2_CNVR_93  | Chr2 | 129392958 | 129401618 | 8661  | -0.8979567 | 0.536646 | 2.89E-184 | Loss | Gain |
| Chr2_CNVR_94  | Chr2 | 129887444 | 129897836 | 10393 | -0.8621382 | 0.550137 | 5.52E-206 | Loss | Gain |
| Chr2_CNVR_95  | Chr2 | 129991364 | 130000890 | 9527  | -0.8211101 | 0.566006 | 7.54E-174 | Loss | Gain |
| Chr2_CNVR_96  | Chr2 | 130524820 | 130533480 | 8661  | -0.7868486 | 0.579609 | 5.47E-147 | Loss | Gain |
| Chr2_CNVR_97  | Chr2 | 130538676 | 130555996 | 17321 | -0.8709632 | 0.546782 | 0         | Loss | Gain |
| Chr2_CNVR_98  | Chr2 | 130556862 | 130577646 | 20785 | -0.9243776 | 0.526908 | 0         | Loss | Gain |
| Chr2_CNVR_99  | Chr2 | 130606224 | 130634802 | 28579 | -1.030385  | 0.489579 | 0         | Loss | Gain |
| Chr2_CNVR_100 | Chr2 | 130636534 | 130651256 | 14723 | -0.9472943 | 0.518604 | 0         | Loss | Gain |
| Chr2_CNVR_101 | Chr2 | 130652122 | 130686762 | 34641 | -0.9257171 | 0.526419 | 0         | Loss | Gain |
| Chr2_CNVR_102 | Chr2 | 130719670 | 130732660 | 12991 | -0.8976439 | 0.536763 | 3.52E-275 | Loss | Gain |
| Chr2_CNVR_103 | Chr2 | 130769898 | 130784620 | 14723 | -0.8365502 | 0.559981 | 2.86E-276 | Loss | Gain |
| Chr2_CNVR_104 | Chr2 | 130785486 | 130797610 | 12125 | -0.9133619 | 0.530946 | 1.33E-264 | Loss | Gain |
| Chr2_CNVR_105 | Chr2 | 130806270 | 130817528 | 11259 | -0.929957  | 0.524874 | 2.21E-253 | Loss | Gain |
| Chr2_CNVR_106 | Chr2 | 130818394 | 130862560 | 44167 | -0.9763084 | 0.508279 | 0         | Loss | Gain |
| Chr2_CNVR_107 | Chr2 | 130863426 | 130873818 | 10393 | -1.038834  | 0.486721 | 1.11E-280 | Loss | Gain |
| Chr2_CNVR_108 | Chr2 | 130883344 | 130902396 | 19053 | -0.9592242 | 0.514333 | 0         | Loss | Gain |
| Chr2_CNVR_109 | Chr2 | 131273910 | 131286900 | 12991 | -0.8931238 | 0.538447 | 7.67E-273 | Loss | Gain |
| Chr2_CNVR_110 | Chr2 | 131291230 | 131300756 | 9527  | -0.9582936 | 0.514665 | 1.06E-225 | Loss | Gain |
| Chr2_CNVR_111 | Chr2 | 131467894 | 131486946 | 19053 | -0.8833014 | 0.542125 | 0         | Loss | Gain |
| Chr2_CNVR_112 | Chr2 | 131490410 | 131517256 | 26847 | -0.8986904 | 0.536373 | 0         | Loss | Gain |
| Chr2_CNVR_113 | Chr2 | 131518122 | 131550164 | 32043 | -0.9877914 | 0.504249 | 0         | Loss | Gain |
| Chr2_CNVR_114 | Chr2 | 131570082 | 131578742 | 8661  | -1.029643  | 0.489831 | 6.30E-231 | Loss | Gain |
| Chr2_CNVR_115 | Chr2 | 131723364 | 131767530 | 44167 | -0.9716813 | 0.509911 | 0         | Loss | Gain |
| Chr2_CNVR_116 | Chr2 | 131768396 | 131777056 | 8661  | -0.9644132 | 0.512487 | 1.53E-207 | Loss | Gain |
| Chr2_CNVR_117 | Chr2 | 131778788 | 131788314 | 9527  | -1.063129  | 0.478593 | 3.45E-267 | Loss | Gain |
| Chr2_CNVR_118 | Chr2 | 131789180 | 131808232 | 19053 | -0.9390025 | 0.521593 | 0         | Loss | Gain |
| Chr2_CNVR_119 | Chr2 | 131814294 | 131824686 | 10393 | -0.8571882 | 0.552027 | 5.69E-204 | Loss | Gain |
| Chr2_CNVR_120 | Chr2 | 131932936 | 131945926 | 12991 | -0.8492644 | 0.555068 | 2.01E-250 | Loss | Gain |
| Chr2_CNVR_121 | Chr2 | 131966710 | 131979700 | 12991 | -0.9325941 | 0.523915 | 2.04E-293 | Loss | Gain |
| Chr2_CNVR_122 | Chr2 | 132038588 | 132048980 | 10393 | -0.8170663 | 0.567595 | 7.38E-188 | Loss | Gain |
| Chr2_CNVR_123 | Chr2 | 132551260 | 132567714 | 16455 | -0.9298366 | 0.524918 | 0         | Loss | Gain |
| Chr2_CNVR_124 | Chr2 | 132578106 | 132588498 | 10393 | -0.8793811 | 0.543601 | 4.90E-213 | Loss | Gain |
| Chr2_CNVR_125 | Chr2 | 132589364 | 132598024 | 8661  | -1.009417  | 0.496747 | 1.26E-223 | Loss | Gain |
| Chr2_CNVR_126 | Chr2 | 132600622 | 132617076 | 16455 | -0.8748833 | 0.545298 | 0         | Loss | Gain |
| Chr2_CNVR_127 | Chr2 | 132740914 | 132753038 | 12125 | -0.9017348 | 0.535243 | 5.88E-259 | Loss | Gain |
| Chr2_CNVR_128 | Chr2 | 132766028 | 132777286 | 11259 | -0.8717766 | 0.546473 | 3.09E-227 | Loss | Gain |
| Chr2_CNVR_129 | Chr2 | 132781616 | 132796338 | 14723 | -0.887011  | 0.540733 | 2.34E-305 | Loss | Gain |
| Chr2_CNVR_130 | Chr2 | 132817988 | 132827514 | 9527  | -0.8165668 | 0.567792 | 3.41E-172 | Loss | Gain |
| Chr2_CNVR_131 | Chr2 | 132846566 | 132855226 | 8661  | -0.9190009 | 0.528875 | 1.44E-191 | Loss | Gain |
| Chr2_CNVR_132 | Chr2 | 132876010 | 132887268 | 11259 | -0.810495  | 0.570186 | 1.61E-200 | Loss | Gain |

|               |      |           |           |       |            |          |           |      |      |
|---------------|------|-----------|-----------|-------|------------|----------|-----------|------|------|
| Chr2_CNVR_133 | Chr2 | 132914980 | 132938362 | 23383 | -0.9500735 | 0.517606 | 0         | Loss | Gain |
| Chr2_CNVR_134 | Chr2 | 133283896 | 133296886 | 12991 | -1.361209  | 0.389256 | 0         | Loss | Gain |
| Chr2_CNVR_135 | Chr2 | 133530706 | 133567944 | 37239 | -0.9642155 | 0.512557 | 0         | Loss | Gain |
| Chr2_CNVR_136 | Chr2 | 133568810 | 133586130 | 17321 | -0.8750274 | 0.545244 | 0         | Loss | Gain |
| Chr2_CNVR_137 | Chr2 | 133612976 | 133628564 | 15589 | -0.9177116 | 0.529348 | 0         | Loss | Gain |
| Chr2_CNVR_138 | Chr2 | 133638956 | 133655410 | 16455 | -0.8451338 | 0.556659 | 0         | Loss | Gain |
| Chr2_CNVR_139 | Chr2 | 133803496 | 133820816 | 17321 | -0.9452072 | 0.519355 | 0         | Loss | Gain |
| Chr2_CNVR_140 | Chr2 | 133833806 | 133869312 | 35507 | -1.040674  | 0.4861   | 0         | Loss | Gain |
| Chr2_CNVR_141 | Chr2 | 133871044 | 133903086 | 32043 | -1.040826  | 0.486049 | 0         | Loss | Gain |
| Chr2_CNVR_142 | Chr2 | 133903952 | 133918674 | 14723 | -0.9891435 | 0.503777 | 0         | Loss | Gain |
| Chr2_CNVR_143 | Chr2 | 133919540 | 133928200 | 8661  | -0.9477128 | 0.518454 | 1.23E-201 | Loss | Gain |
| Chr2_CNVR_144 | Chr2 | 133929932 | 133946386 | 16455 | -0.9757564 | 0.508473 | 0         | Loss | Gain |
| Chr2_CNVR_145 | Chr2 | 133947252 | 133959376 | 12125 | -0.9421479 | 0.520457 | 1.07E-278 | Loss | Gain |
| Chr2_CNVR_146 | Chr2 | 133975830 | 133985356 | 9527  | -0.844041  | 0.557081 | 2.86E-182 | Loss | Gain |
| Chr2_CNVR_147 | Chr2 | 133986222 | 133996614 | 10393 | -0.9435454 | 0.519954 | 8.86E-240 | Loss | Gain |
| Chr2_CNVR_148 | Chr2 | 134134308 | 134153360 | 19053 | -0.849693  | 0.554903 | 0         | Loss | Gain |
| Chr2_CNVR_149 | Chr2 | 134155092 | 134168082 | 12991 | -1.003845  | 0.498669 | 0         | Loss | Gain |
| Chr2_CNVR_150 | Chr2 | 134171546 | 134184536 | 12991 | -0.9867667 | 0.504607 | 0         | Loss | Gain |
| Chr2_CNVR_151 | Chr2 | 134196660 | 134205320 | 8661  | -0.8603955 | 0.550802 | 2.08E-171 | Loss | Gain |
| Chr2_CNVR_152 | Chr2 | 134274600 | 134289322 | 14723 | -0.8845078 | 0.541672 | 6.76E-304 | Loss | Gain |
| Chr2_CNVR_153 | Chr2 | 134304044 | 134336086 | 32043 | -1.074341  | 0.474888 | 0         | Loss | Gain |
| Chr2_CNVR_154 | Chr2 | 134337818 | 134360334 | 22517 | -0.9605091 | 0.513876 | 0         | Loss | Gain |
| Chr2_CNVR_155 | Chr2 | 134361200 | 134375922 | 14723 | -1.09268   | 0.46889  | 0         | Loss | Gain |
| Chr2_CNVR_156 | Chr2 | 134380252 | 134391510 | 11259 | -0.9686485 | 0.510985 | 4.01E-271 | Loss | Gain |
| Chr2_CNVR_157 | Chr2 | 134401902 | 134433944 | 32043 | -0.9669809 | 0.511576 | 0         | Loss | Gain |
| Chr2_CNVR_158 | Chr2 | 134436542 | 134450398 | 13857 | -0.9705059 | 0.510327 | 0         | Loss | Gain |
| Chr2_CNVR_159 | Chr2 | 134472048 | 134487636 | 15589 | -0.8206115 | 0.566202 | 7.66E-283 | Loss | Gain |
| Chr2_CNVR_160 | Chr2 | 134505822 | 134517080 | 11259 | -0.8742986 | 0.545519 | 2.35E-228 | Loss | Gain |
| Chr2_CNVR_161 | Chr2 | 134517946 | 134536998 | 19053 | -0.9360705 | 0.522655 | 0         | Loss | Gain |
| Chr2_CNVR_162 | Chr2 | 134537864 | 134547390 | 9527  | -1.062231  | 0.478891 | 7.90E-267 | Loss | Gain |
| Chr2_CNVR_163 | Chr2 | 134548256 | 134589824 | 41569 | -1.03927   | 0.486574 | 0         | Loss | Gain |
| Chr2_CNVR_164 | Chr2 | 134590690 | 134603680 | 12991 | -0.9492841 | 0.517889 | 3.22E-302 | Loss | Gain |
| Chr2_CNVR_165 | Chr2 | 134617536 | 134656506 | 38971 | -0.9706062 | 0.510292 | 0         | Loss | Gain |
| Chr2_CNVR_166 | Chr2 | 134673826 | 134683352 | 9527  | -0.8682628 | 0.547806 | 2.78E-191 | Loss | Gain |
| Chr2_CNVR_167 | Chr2 | 134684218 | 134696342 | 12125 | -0.870303  | 0.547032 | 7.54E-244 | Loss | Gain |
| Chr2_CNVR_168 | Chr2 | 134704136 | 134718858 | 14723 | -0.8002325 | 0.574257 | 7.68E-256 | Loss | Gain |
| Chr2_CNVR_169 | Chr2 | 134804592 | 134817582 | 12991 | -0.879864  | 0.543419 | 5.19E-266 | Loss | Gain |
| Chr2_CNVR_170 | Chr2 | 134821046 | 134833170 | 12125 | -0.9947347 | 0.501828 | 7.69E-305 | Loss | Gain |
| Chr2_CNVR_171 | Chr2 | 134834902 | 134859150 | 24249 | -0.9424085 | 0.520363 | 0         | Loss | Gain |
| Chr2_CNVR_172 | Chr2 | 134863480 | 134932760 | 69281 | -0.9737226 | 0.50919  | 0         | Loss | Gain |
| Chr2_CNVR_173 | Chr2 | 134945750 | 134992514 | 46765 | -0.9474179 | 0.51856  | 0         | Loss | Gain |
| Chr2_CNVR_174 | Chr2 | 134995112 | 135035814 | 40703 | -0.8859416 | 0.541134 | 0         | Loss | Gain |
| Chr2_CNVR_175 | Chr2 | 135042742 | 135053134 | 10393 | -0.8629615 | 0.549823 | 2.55E-206 | Loss | Gain |
| Chr2_CNVR_176 | Chr2 | 135054000 | 135062660 | 8661  | -0.9348741 | 0.523088 | 4.05E-197 | Loss | Gain |
| Chr2_CNVR_177 | Chr2 | 135075650 | 135092970 | 17321 | -0.9421779 | 0.520447 | 0         | Loss | Gain |
| Chr2_CNVR_178 | Chr2 | 135093836 | 135103362 | 9527  | -0.9150825 | 0.530314 | 5.16E-209 | Loss | Gain |
| Chr2_CNVR_179 | Chr2 | 135107692 | 135126744 | 19053 | -0.943729  | 0.519887 | 0         | Loss | Gain |
| Chr2_CNVR_180 | Chr2 | 135162250 | 135175240 | 12991 | -0.8722603 | 0.54629  | 4.09E-262 | Loss | Gain |
| Chr2_CNVR_181 | Chr2 | 135176972 | 135186498 | 9527  | -0.8870005 | 0.540737 | 2.48E-198 | Loss | Gain |
| Chr2_CNVR_182 | Chr2 | 135204684 | 135215076 | 10393 | -0.8638022 | 0.549502 | 1.16E-206 | Loss | Gain |
| Chr2_CNVR_183 | Chr2 | 135229798 | 135249716 | 19919 | -0.9584535 | 0.514608 | 0         | Loss | Gain |
| Chr2_CNVR_184 | Chr2 | 135250582 | 135279160 | 28579 | -0.9364596 | 0.522514 | 0         | Loss | Gain |
| Chr2_CNVR_185 | Chr2 | 135280026 | 135289552 | 9527  | -0.9071424 | 0.53324  | 5.58E-206 | Loss | Gain |
| Chr2_CNVR_186 | Chr2 | 135294748 | 135303408 | 8661  | -0.9202391 | 0.528421 | 5.34E-192 | Loss | Gain |
| Chr2_CNVR_187 | Chr2 | 135314666 | 135334584 | 19919 | -0.9323536 | 0.524003 | 0         | Loss | Gain |
| Chr2_CNVR_188 | Chr2 | 135335450 | 135344110 | 8661  | -0.9411223 | 0.520828 | 2.58E-199 | Loss | Gain |



|               |       |           |           |        |            |          |           |      |      |
|---------------|-------|-----------|-----------|--------|------------|----------|-----------|------|------|
| Chr2_CNVR_189 | Chr2  | 135344976 | 135354502 | 9527   | -0.9401207 | 0.521189 | 1.20E-218 | Loss | Gain |
| Chr2_CNVR_190 | Chr2  | 135357100 | 135370956 | 13857  | -0.9028403 | 0.534833 | 2.97E-296 | Loss | Gain |
| Chr2_CNVR_191 | Chr2  | 135371822 | 135386544 | 14723  | -0.8890546 | 0.539968 | 1.50E-306 | Loss | Gain |
| Chr2_CNVR_192 | Chr2  | 135394338 | 135414256 | 19919  | -0.9493626 | 0.517861 | 0         | Loss | Gain |
| Chr2_CNVR_193 | Chr2  | 135467082 | 135497392 | 30311  | -0.9969194 | 0.501069 | 0         | Loss | Gain |
| Chr2_CNVR_194 | Chr2  | 135506052 | 135517310 | 11259  | -0.9155325 | 0.530148 | 7.77E-247 | Loss | Gain |
| Chr2_CNVR_195 | Chr2  | 135518176 | 135602178 | 84003  | -1.061159  | 0.479247 | 0         | Loss | Gain |
| Chr2_CNVR_196 | Chr2  | 135603910 | 135644612 | 40703  | -1.104122  | 0.465185 | 0         | Loss | Gain |
| Chr2_CNVR_197 | Chr2  | 135645478 | 135761522 | 116045 | -1.071063  | 0.475968 | 0         | Loss | Gain |
| Chr2_CNVR_198 | Chr2  | 135786636 | 135838596 | 51961  | -1.055325  | 0.481189 | 0         | Loss | Gain |
| Chr2_CNVR_199 | Chr2  | 135839462 | 135851586 | 12125  | -1.003407  | 0.498821 | 0         | Loss | Gain |
| Chr2_CNVR_200 | Chr2  | 135852452 | 135867174 | 14723  | -0.9049428 | 0.534054 | 0         | Loss | Gain |
| Chr2_CNVR_201 | Chr2  | 135881030 | 135900948 | 19919  | -0.9589607 | 0.514427 | 0         | Loss | Gain |
| Chr2_CNVR_202 | Chr2  | 135906144 | 135924330 | 18187  | -0.9814787 | 0.50646  | 0         | Loss | Gain |
| Chr2_CNVR_203 | Chr2  | 135926928 | 135953774 | 26847  | -0.9723377 | 0.50968  | 0         | Loss | Gain |
| Chr2_CNVR_204 | Chr2  | 135962434 | 135972826 | 10393  | -0.9790952 | 0.507298 | 6.81E-255 | Loss | Gain |
| Chr2_CNVR_205 | Chr2  | 136000538 | 136018724 | 18187  | -0.8712052 | 0.54669  | 0         | Loss | Gain |
| Chr2_CNVR_206 | Chr2  | 136042972 | 136067220 | 24249  | -0.8663285 | 0.548541 | 0         | Loss | Gain |
| Chr2_CNVR_207 | Chr2  | 136073282 | 136103592 | 30311  | -0.9723485 | 0.509676 | 0         | Loss | Gain |
| Chr2_CNVR_208 | Chr2  | 136104458 | 136113984 | 9527   | -0.8555016 | 0.552673 | 1.61E-186 | Loss | Gain |
| Chr2_CNVR_209 | Chr2  | 136115716 | 136125242 | 9527   | -0.9547582 | 0.515928 | 2.52E-224 | Loss | Gain |
| Chr2_CNVR_210 | Chr2  | 136129572 | 136142562 | 12991  | -0.8559159 | 0.552514 | 8.64E-254 | Loss | Gain |
| Chr2_CNVR_211 | Chr2  | 136149490 | 136190192 | 40703  | -1.04657   | 0.484118 | 0         | Loss | Gain |
| Chr2_CNVR_212 | Chr2  | 136196254 | 136238688 | 42435  | -0.9873883 | 0.50439  | 0         | Loss | Gain |
| Chr2_CNVR_213 | Chr2  | 136239554 | 136259472 | 19919  | -0.9135779 | 0.530867 | 0         | Loss | Gain |
| Chr2_CNVR_214 | Chr2  | 136312298 | 136321824 | 9527   | -0.8363113 | 0.560074 | 2.03E-179 | Loss | Gain |
| Chr2_CNVR_215 | Chr2  | 136439600 | 136449126 | 9527   | -0.8903892 | 0.539469 | 1.30E-199 | Loss | Gain |
| Chr2_CNVR_216 | Chr2  | 136451724 | 136467312 | 15589  | -0.9083912 | 0.532779 | 0         | Loss | Gain |
| Chr2_CNVR_217 | Chr2  | 136468178 | 136482034 | 13857  | -0.9120741 | 0.531421 | 2.24E-301 | Loss | Gain |
| Chr2_CNVR_218 | Chr2  | 136482900 | 136515808 | 32909  | -0.9734175 | 0.509298 | 0         | Loss | Gain |
| Chr2_CNVR_219 | Chr2  | 136517540 | 136554778 | 37239  | -1.005292  | 0.498169 | 0         | Loss | Gain |
| Chr2_CNVR_220 | Chr2  | 136556510 | 136572098 | 15589  | -0.9301081 | 0.524819 | 0         | Loss | Gain |
| Chr2_CNVR_221 | Chr2  | 136573830 | 136611934 | 38105  | -0.9827903 | 0.506    | 0         | Loss | Gain |
| Chr2_CNVR_222 | Chr2  | 136612800 | 136626656 | 13857  | -1.006375  | 0.497795 | 0         | Loss | Gain |
| Chr2_CNVR_223 | Chr2  | 136637048 | 136656966 | 19919  | -0.8953256 | 0.537626 | 0         | Loss | Gain |
| Chr2_CNVR_224 | Chr2  | 136658698 | 136669090 | 10393  | -0.8938956 | 0.538159 | 5.10E-219 | Loss | Gain |
| Chr2_CNVR_225 | Chr2  | 136726246 | 136735772 | 9527   | -0.8590684 | 0.551308 | 7.57E-188 | Loss | Gain |
| Chr2_CNVR_226 | Chr2  | 136811980 | 136827568 | 15589  | -1.362143  | 0.389004 | 0         | Loss | Gain |
| Chr2_CNVR_227 | Chr2  | 136910704 | 136921096 | 10393  | -1.435321  | 0.369765 | 0         | Loss | Gain |
| Chr2_CNVR_228 | Chr2  | 136972190 | 136982582 | 10393  | -1.272312  | 0.413996 | 0         | Loss | Gain |
| Chr2_CNVR_5   | Chr2  | 136994706 | 137020686 | 25981  | 2.851376   | 7.21688  | 0         | Gain | Loss |
| Chr2_CNVR_6   | Chr2  | 137043202 | 137057058 | 13857  | 2.907879   | 7.50514  | 0         | Gain | Loss |
| Chr20_CNVR_3  | Chr20 | 429292    | 438938    | 9647   | -0.8194912 | 0.566642 | 3.63E-173 | Loss | Gain |
| Chr20_CNVR_4  | Chr20 | 465250    | 474018    | 8769   | -0.8570541 | 0.552079 | 3.80E-170 | Loss | Gain |
| Chr20_CNVR_1  | Chr20 | 16924786  | 16934432  | 9647   | 0.8854109  | 1.84729  | 1.03E-209 | Gain | Loss |
| Chr20_CNVR_2  | Chr20 | 44576596  | 44586242  | 9647   | 1.170145   | 2.25034  | 0         | Gain | Loss |
| Chr20_CNVR_5  | Chr20 | 58788380  | 58797150  | 8771   | -0.8066519 | 0.571707 | 2.18E-153 | Loss | Gain |
| Chr20_CNVR_6  | Chr20 | 62334968  | 62350754  | 15787  | -0.8557299 | 0.552586 | 9.00E-304 | Loss | Gain |
| Chr20_CNVR_7  | Chr20 | 66577018  | 66597188  | 20171  | -0.915351  | 0.530215 | 0         | Loss | Gain |
| Chr20_CNVR_8  | Chr20 | 66769958  | 66778726  | 8769   | -0.7954935 | 0.576146 | 9.58E-150 | Loss | Gain |
| Chr20_CNVR_9  | Chr20 | 66956758  | 66968158  | 11401  | -0.8147743 | 0.568497 | 2.97E-202 | Loss | Gain |
| Chr20_CNVR_10 | Chr20 | 69434284  | 69443052  | 8769   | -0.865393  | 0.548897 | 5.79E-173 | Loss | Gain |
| Chr20_CNVR_11 | Chr20 | 69455332  | 69472870  | 17539  | -0.8748678 | 0.545304 | 0         | Loss | Gain |
| Chr20_CNVR_12 | Chr20 | 69505320  | 69518474  | 13155  | -0.8373795 | 0.559659 | 2.80E-244 | Loss | Gain |
| Chr20_CNVR_13 | Chr20 | 70253402  | 70263924  | 10523  | -0.9529045 | 0.516591 | 2.04E-243 | Loss | Gain |
| Chr20_CNVR_14 | Chr20 | 70584030  | 70599816  | 15787  | -0.9422982 | 0.520403 | 0         | Loss | Gain |

|               |       |          |          |       |            |           |           |      |      |
|---------------|-------|----------|----------|-------|------------|-----------|-----------|------|------|
| Chr20_CNVR_15 | Chr20 | 70600694 | 70609462 | 8769  | -0.8761929 | 0.544803  | 1.25E-176 | Loss | Gain |
| Chr20_CNVR_16 | Chr20 | 70869932 | 70878702 | 8771  | -0.9388824 | 0.521637  | 2.80E-198 | Loss | Gain |
| Chr20_CNVR_17 | Chr20 | 70897996 | 70942722 | 44727 | -0.9521621 | 0.516857  | 0         | Loss | Gain |
| Chr20_CNVR_18 | Chr20 | 70944478 | 70979556 | 35079 | -1.097531  | 0.467316  | 0         | Loss | Gain |
| Chr20_CNVR_19 | Chr20 | 70980434 | 71012006 | 31573 | -1.012463  | 0.495699  | 0         | Loss | Gain |
| Chr20_CNVR_20 | Chr20 | 71013760 | 71033930 | 20171 | -0.9413561 | 0.520743  | 0         | Loss | Gain |
| Chr20_CNVR_21 | Chr20 | 71044456 | 71081288 | 36833 | -0.9579725 | 0.51478   | 0         | Loss | Gain |
| Chr20_CNVR_22 | Chr20 | 71090936 | 71143556 | 52621 | -1.035859  | 0.487725  | 0         | Loss | Gain |
| Chr20_CNVR_23 | Chr20 | 71144434 | 71179512 | 35079 | -1.054925  | 0.481322  | 0         | Loss | Gain |
| Chr20_CNVR_24 | Chr20 | 71180390 | 71201438 | 21049 | -1.088889  | 0.470123  | 0         | Loss | Gain |
| Chr20_CNVR_25 | Chr20 | 71202316 | 71262828 | 60513 | -1.024912  | 0.49144   | 0         | Loss | Gain |
| Chr20_CNVR_26 | Chr20 | 71276860 | 71308432 | 31573 | -1.074525  | 0.474827  | 0         | Loss | Gain |
| Chr20_CNVR_27 | Chr20 | 71318080 | 71354912 | 36833 | -1.025295  | 0.49131   | 0         | Loss | Gain |
| Chr20_CNVR_28 | Chr20 | 71355790 | 71379468 | 23679 | -1.004687  | 0.498378  | 0         | Loss | Gain |
| Chr20_CNVR_29 | Chr20 | 71381224 | 71422442 | 41219 | -1.038383  | 0.486873  | 0         | Loss | Gain |
| Chr20_CNVR_30 | Chr20 | 71423320 | 71446998 | 23679 | -1.192259  | 0.437617  | 0         | Loss | Gain |
| Chr20_CNVR_31 | Chr20 | 71448752 | 71472430 | 23679 | -1.045977  | 0.484317  | 0         | Loss | Gain |
| Chr20_CNVR_32 | Chr20 | 71474186 | 71486462 | 12277 | -0.9729819 | 0.509452  | 1.52E-293 | Loss | Gain |
| Chr20_CNVR_33 | Chr20 | 71488218 | 71518034 | 29817 | -0.8860998 | 0.541075  | 0         | Loss | Gain |
| Chr20_CNVR_34 | Chr20 | 71557500 | 71567146 | 9647  | -0.8903617 | 0.539479  | 2.07E-199 | Loss | Gain |
| Chr20_CNVR_35 | Chr20 | 71612752 | 71622398 | 9647  | -0.8836483 | 0.541995  | 6.96E-197 | Loss | Gain |
| Chr20_CNVR_36 | Chr20 | 71687296 | 71699574 | 12279 | -0.8408878 | 0.5583    | 8.95E-230 | Loss | Gain |
| Chr20_CNVR_37 | Chr20 | 71703082 | 71712728 | 9647  | -0.8873555 | 0.540604  | 2.81E-198 | Loss | Gain |
| Chr20_CNVR_38 | Chr20 | 71759210 | 71768856 | 9647  | -0.807646  | 0.571313  | 7.01E-169 | Loss | Gain |
| Chr21_CNVR_7  | Chr21 | 5769965  | 5783209  | 13245 | -0.9201439 | 0.528456  | 2.71E-285 | Loss | Gain |
| Chr21_CNVR_8  | Chr21 | 9610131  | 9641035  | 30905 | -1.586218  | 0.333043  | 0         | Loss | Gain |
| Chr21_CNVR_9  | Chr21 | 20088693 | 20109883 | 21191 | -1.236107  | 0.424517  | 0         | Loss | Gain |
| Chr21_CNVR_10 | Chr21 | 20125779 | 20142555 | 16777 | -1.180888  | 0.44108   | 0         | Loss | Gain |
| Chr21_CNVR_11 | Chr21 | 20564629 | 20574341 | 9713  | -1.224455  | 0.427959  | 0         | Loss | Gain |
| Chr21_CNVR_12 | Chr21 | 33295723 | 33305435 | 9713  | -0.794853  | 0.576402  | 5.50E-164 | Loss | Gain |
| Chr21_CNVR_13 | Chr21 | 33308085 | 33316915 | 8831  | -0.9205317 | 0.528314  | 4.92E-191 | Loss | Gain |
| Chr21_CNVR_14 | Chr21 | 33518239 | 33529717 | 11479 | -0.8381637 | 0.559355  | 9.59E-212 | Loss | Gain |
| Chr21_CNVR_15 | Chr21 | 33549145 | 33557973 | 8829  | -0.8071323 | 0.571517  | 3.18E-153 | Loss | Gain |
| Chr21_CNVR_16 | Chr21 | 33595943 | 33604773 | 8831  | -0.9697801 | 0.510584  | 4.97E-208 | Loss | Gain |
| Chr21_CNVR_17 | Chr21 | 34266141 | 34275853 | 9713  | -0.7937792 | 0.576831  | 1.32E-163 | Loss | Gain |
| Chr21_CNVR_1  | Chr21 | 37111167 | 37124411 | 13245 | 1.088522   | 2.12656   | 0         | Gain | Loss |
| Chr21_CNVR_2  | Chr21 | 37127061 | 37141187 | 14127 | 1.040653   | 2.05716   | 0         | Gain | Loss |
| Chr21_CNVR_18 | Chr21 | 37430813 | 37442291 | 11479 | -6.637386  | 0.0100449 | 0         | Loss | Gain |
| Chr21_CNVR_3  | Chr21 | 40146037 | 40156633 | 10597 | 0.9657535  | 1.95308   | 3.01E-278 | Gain | Loss |
| Chr21_CNVR_4  | Chr21 | 49704513 | 49717757 | 13245 | 0.8573897  | 1.81176   | 4.56E-282 | Gain | Loss |
| Chr21_CNVR_5  | Chr21 | 53532317 | 53545561 | 13245 | 0.9650992  | 1.9522    | 0         | Gain | Loss |
| Chr21_CNVR_6  | Chr21 | 53550861 | 53560573 | 9713  | 0.8754435  | 1.83457   | 3.46E-215 | Gain | Loss |
| Chr21_CNVR_19 | Chr21 | 62490353 | 62499181 | 8829  | -2.64866   | 0.159468  | 0         | Loss | Gain |
| Chr21_CNVR_20 | Chr21 | 65884605 | 65893433 | 8829  | -0.8137901 | 0.568885  | 2.21E-155 | Loss | Gain |
| Chr21_CNVR_21 | Chr21 | 66181293 | 66193653 | 12361 | -0.8492353 | 0.555079  | 5.46E-233 | Loss | Gain |
| Chr21_CNVR_22 | Chr21 | 66219261 | 66231623 | 12363 | -0.8803349 | 0.543241  | 1.61E-247 | Loss | Gain |
| Chr21_CNVR_23 | Chr21 | 66266061 | 66280187 | 14127 | -0.8806814 | 0.543111  | 9.29E-283 | Loss | Gain |
| Chr21_CNVR_24 | Chr21 | 66319041 | 66328753 | 9713  | -0.8712668 | 0.546667  | 1.39E-191 | Loss | Gain |
| Chr21_CNVR_25 | Chr21 | 66703145 | 66712857 | 9713  | -0.8575129 | 0.551903  | 1.56E-186 | Loss | Gain |
| Chr21_CNVR_26 | Chr21 | 66727869 | 66740231 | 12363 | -0.9254372 | 0.526521  | 5.92E-269 | Loss | Gain |
| Chr21_CNVR_27 | Chr21 | 66958333 | 66968045 | 9713  | -1.000734  | 0.499746  | 1.60E-240 | Loss | Gain |
| Chr21_CNVR_28 | Chr21 | 67088133 | 67098729 | 10597 | -0.8838704 | 0.541912  | 6.87E-214 | Loss | Gain |
| Chr21_CNVR_29 | Chr21 | 67232063 | 67240891 | 8829  | -0.8406673 | 0.558385  | 3.49E-164 | Loss | Gain |
| Chr21_CNVR_30 | Chr21 | 68884155 | 68898283 | 14129 | -0.8345479 | 0.560759  | 3.24E-258 | Loss | Gain |
| Chr21_CNVR_31 | Chr21 | 70336691 | 70353467 | 16777 | -1.00895   | 0.496908  | 0         | Loss | Gain |
| Chr21_CNVR_32 | Chr21 | 70362297 | 70376425 | 14129 | -0.9709414 | 0.510173  | 0         | Loss | Gain |

|               |       |          |          |       |            |           |           |      |      |
|---------------|-------|----------|----------|-------|------------|-----------|-----------|------|------|
| Chr21_CNVR_33 | Chr21 | 70396735 | 70407329 | 10595 | -0.9919658 | 0.502792  | 1.66E-258 | Loss | Gain |
| Chr21_CNVR_34 | Chr21 | 70440885 | 70452363 | 11479 | -0.9103965 | 0.532039  | 3.23E-243 | Loss | Gain |
| Chr21_CNVR_35 | Chr21 | 70817043 | 70834701 | 17659 | -0.9893341 | 0.50371   | 0         | Loss | Gain |
| Chr21_CNVR_36 | Chr21 | 70861193 | 70884149 | 22957 | -0.9253614 | 0.526549  | 0         | Loss | Gain |
| Chr21_CNVR_37 | Chr21 | 70923003 | 70936247 | 13245 | -0.862745  | 0.549905  | 3.26E-256 | Loss | Gain |
| Chr21_CNVR_38 | Chr21 | 70954791 | 70983045 | 28255 | -0.8909734 | 0.53925   | 0         | Loss | Gain |
| Chr21_CNVR_39 | Chr21 | 71121677 | 71141985 | 20309 | -0.8730821 | 0.545979  | 0         | Loss | Gain |
| Chr21_CNVR_40 | Chr21 | 71148167 | 71162295 | 14129 | -0.9694612 | 0.510697  | 0         | Loss | Gain |
| Chr21_CNVR_41 | Chr21 | 71185253 | 71194083 | 8831  | -0.94639   | 0.518929  | 6.37E-200 | Loss | Gain |
| Chr21_CNVR_42 | Chr21 | 71194967 | 71207327 | 12361 | -0.8976403 | 0.536764  | 1.07E-255 | Loss | Gain |
| Chr21_CNVR_43 | Chr21 | 71221457 | 71232935 | 11479 | -0.955182  | 0.515777  | 3.24E-263 | Loss | Gain |
| Chr21_CNVR_44 | Chr21 | 71233819 | 71245297 | 11479 | -0.961491  | 0.513526  | 4.66E-266 | Loss | Gain |
| Chr21_CNVR_45 | Chr21 | 71268255 | 71277085 | 8831  | -0.934494  | 0.523226  | 8.01E-196 | Loss | Gain |
| Chr21_CNVR_46 | Chr21 | 71312405 | 71334479 | 22075 | -0.9614165 | 0.513552  | 0         | Loss | Gain |
| Chr21_CNVR_47 | Chr21 | 71341545 | 71356555 | 15011 | -1.040217  | 0.486254  | 0         | Loss | Gain |
| Chr21_CNVR_48 | Chr21 | 71397173 | 71407769 | 10597 | -0.8636828 | 0.549548  | 9.07E-206 | Loss | Gain |
| Chr21_CNVR_49 | Chr21 | 71408653 | 71421013 | 12361 | -0.8496181 | 0.554932  | 3.63E-233 | Loss | Gain |
| Chr21_CNVR_50 | Chr21 | 71442207 | 71455451 | 13245 | -1.102038  | 0.465858  | 0         | Loss | Gain |
| Chr21_CNVR_51 | Chr21 | 71505783 | 71517261 | 11479 | -0.8740536 | 0.545612  | 3.00E-227 | Loss | Gain |
| Chr22_CNVR_1  | Chr22 | 22883536 | 22894988 | 11453 | -3.414036  | 0.0938151 | 0         | Loss | Gain |
| Chr22_CNVR_2  | Chr22 | 50407738 | 50420070 | 12333 | -0.8455369 | 0.556504  | 4.10E-231 | Loss | Gain |
| Chr22_CNVR_3  | Chr22 | 50428882 | 50441214 | 12333 | -0.9973062 | 0.500934  | 1.83E-303 | Loss | Gain |
| Chr22_CNVR_4  | Chr22 | 50448264 | 50457072 | 8809  | -0.8774003 | 0.544347  | 2.88E-176 | Loss | Gain |
| Chr22_CNVR_5  | Chr22 | 50513458 | 50525790 | 12333 | -0.9271119 | 0.52591   | 1.75E-269 | Loss | Gain |
| Chr22_CNVR_6  | Chr22 | 50534602 | 50548696 | 14095 | -0.8566599 | 0.55223   | 1.05E-269 | Loss | Gain |
| Chr22_CNVR_7  | Chr22 | 50559270 | 50568960 | 9691  | -0.8089038 | 0.570815  | 7.04E-169 | Loss | Gain |
| Chr22_CNVR_8  | Chr22 | 50569842 | 50578650 | 8809  | -0.84938   | 0.555023  | 6.06E-167 | Loss | Gain |
| Chr22_CNVR_9  | Chr22 | 50583056 | 50591866 | 8811  | -0.8588145 | 0.551405  | 4.55E-170 | Loss | Gain |
| Chr22_CNVR_10 | Chr22 | 50682610 | 50700228 | 17619 | -0.8877567 | 0.540454  | 0         | Loss | Gain |
| Chr22_CNVR_11 | Chr22 | 50711682 | 50729302 | 17621 | -0.9485457 | 0.518155  | 0         | Loss | Gain |
| Chr22_CNVR_12 | Chr22 | 51808528 | 51819980 | 11453 | -0.9009267 | 0.535543  | 8.19E-239 | Loss | Gain |
| Chr22_CNVR_13 | Chr22 | 56790582 | 56801154 | 10573 | -0.8838448 | 0.541921  | 1.07E-213 | Loss | Gain |
| Chr22_CNVR_14 | Chr22 | 58338500 | 58347308 | 8809  | -0.8375321 | 0.5596    | 4.85E-163 | Loss | Gain |
| Chr22_CNVR_15 | Chr22 | 58367572 | 58379906 | 12335 | -0.9108278 | 0.53188   | 1.02E-261 | Loss | Gain |
| Chr22_CNVR_16 | Chr22 | 58523510 | 58538486 | 14977 | -0.9580097 | 0.514767  | 0         | Loss | Gain |
| Chr22_CNVR_17 | Chr22 | 58553464 | 58579012 | 25549 | -0.8585403 | 0.55151   | 0         | Loss | Gain |
| Chr22_CNVR_18 | Chr22 | 58581656 | 58598394 | 16739 | -0.9497685 | 0.517716  | 0         | Loss | Gain |
| Chr22_CNVR_19 | Chr22 | 58891768 | 58903220 | 11453 | -0.8007113 | 0.574066  | 8.94E-196 | Loss | Gain |
| Chr22_CNVR_20 | Chr22 | 58948152 | 58964008 | 15857 | -0.8405728 | 0.558422  | 1.37E-293 | Loss | Gain |
| Chr22_CNVR_21 | Chr22 | 58984272 | 58997486 | 13215 | -0.9398876 | 0.521273  | 3.84E-295 | Loss | Gain |
| Chr22_CNVR_22 | Chr22 | 59016870 | 59032726 | 15857 | -0.9132609 | 0.530984  | 0         | Loss | Gain |
| Chr22_CNVR_23 | Chr22 | 59039776 | 59064442 | 24667 | -0.9461296 | 0.519023  | 0         | Loss | Gain |
| Chr22_CNVR_24 | Chr22 | 59160472 | 59173686 | 13215 | -0.8494063 | 0.555013  | 2.20E-249 | Loss | Gain |
| Chr22_CNVR_25 | Chr22 | 59174568 | 59195712 | 21145 | -0.874901  | 0.545291  | 0         | Loss | Gain |
| Chr22_CNVR_26 | Chr22 | 59197474 | 59206284 | 8811  | -0.808249  | 0.571075  | 1.68E-153 | Loss | Gain |
| Chr22_CNVR_27 | Chr22 | 59207166 | 59223904 | 16739 | -0.917605  | 0.529387  | 0         | Loss | Gain |
| Chr22_CNVR_28 | Chr22 | 59225666 | 59251214 | 25549 | -0.9724213 | 0.50965   | 0         | Loss | Gain |
| Chr22_CNVR_29 | Chr22 | 59264430 | 59290860 | 26431 | -0.9583141 | 0.514658  | 0         | Loss | Gain |
| Chr22_CNVR_30 | Chr22 | 59313766 | 59324338 | 10573 | -0.9235018 | 0.527228  | 8.22E-230 | Loss | Gain |
| Chr22_CNVR_31 | Chr22 | 59354292 | 59364864 | 10573 | -0.9219092 | 0.52781   | 3.69E-229 | Loss | Gain |
| Chr22_CNVR_32 | Chr22 | 59375436 | 59398342 | 22907 | -0.9096485 | 0.532315  | 0         | Loss | Gain |
| Chr22_CNVR_33 | Chr22 | 59400104 | 59414200 | 14097 | -0.9181478 | 0.529188  | 8.86E-303 | Loss | Gain |
| Chr22_CNVR_34 | Chr22 | 59424772 | 59452082 | 27311 | -1.016015  | 0.49448   | 0         | Loss | Gain |
| Chr22_CNVR_35 | Chr22 | 59465298 | 59480274 | 14977 | -1.002246  | 0.499222  | 0         | Loss | Gain |
| Chr22_CNVR_36 | Chr22 | 59481156 | 59496132 | 14977 | -0.9785504 | 0.507489  | 0         | Loss | Gain |
| Chr22_CNVR_37 | Chr22 | 59497014 | 59505824 | 8811  | -0.8253635 | 0.56434   | 4.67E-159 | Loss | Gain |

|               |       |          |          |       |            |          |           |      |      |
|---------------|-------|----------|----------|-------|------------|----------|-----------|------|------|
| Chr22_CNVR_38 | Chr22 | 59507586 | 59516396 | 8811  | -0.9707687 | 0.510234 | 3.95E-208 | Loss | Gain |
| Chr22_CNVR_39 | Chr22 | 59526088 | 59548112 | 22025 | -0.9500625 | 0.51761  | 0         | Loss | Gain |
| Chr22_CNVR_40 | Chr22 | 59697002 | 59709334 | 12333 | -0.948763  | 0.518076 | 6.99E-280 | Loss | Gain |
| Chr22_CNVR_41 | Chr22 | 59963944 | 59972754 | 8811  | -0.9295465 | 0.525023 | 6.33E-194 | Loss | Gain |
| Chr22_CNVR_42 | Chr22 | 60019448 | 60033542 | 14095 | -0.9979392 | 0.500715 | 0         | Loss | Gain |
| Chr22_CNVR_43 | Chr22 | 60042354 | 60059972 | 17619 | -1.034365  | 0.488231 | 0         | Loss | Gain |
| Chr22_CNVR_44 | Chr22 | 60061736 | 60072306 | 10571 | -1.026214  | 0.490997 | 1.37E-272 | Loss | Gain |
| Chr22_CNVR_45 | Chr22 | 60083760 | 60106666 | 22907 | -0.9415738 | 0.520665 | 0         | Loss | Gain |
| Chr22_CNVR_46 | Chr22 | 60107548 | 60132214 | 24667 | -0.9629121 | 0.51302  | 0         | Loss | Gain |
| Chr22_CNVR_47 | Chr22 | 60139264 | 60165692 | 26429 | -0.8744016 | 0.54548  | 0         | Loss | Gain |
| Chr22_CNVR_48 | Chr22 | 60426470 | 60435278 | 8809  | -0.8850295 | 0.541476 | 7.95E-179 | Loss | Gain |
| Chr22_CNVR_49 | Chr22 | 60445852 | 60466114 | 20263 | -0.9051313 | 0.533984 | 0         | Loss | Gain |
| Chr22_CNVR_50 | Chr22 | 60466996 | 60489020 | 22025 | -0.9449308 | 0.519454 | 0         | Loss | Gain |
| Chr22_CNVR_51 | Chr22 | 60599146 | 60608836 | 9691  | -0.9391642 | 0.521535 | 9.83E-217 | Loss | Gain |
| Chr22_CNVR_52 | Chr22 | 60636148 | 60655528 | 19381 | -0.9222524 | 0.527685 | 0         | Loss | Gain |
| Chr22_CNVR_53 | Chr22 | 60666102 | 60681078 | 14977 | -0.9006723 | 0.535637 | 0         | Loss | Gain |
| Chr22_CNVR_54 | Chr22 | 60681960 | 60690768 | 8809  | -0.9083484 | 0.532795 | 1.06E-186 | Loss | Gain |
| Chr22_CNVR_55 | Chr22 | 61119816 | 61130388 | 10573 | -0.8679854 | 0.547911 | 2.50E-207 | Loss | Gain |
| Chr22_CNVR_56 | Chr22 | 61138318 | 61147126 | 8809  | -0.8620056 | 0.550187 | 3.96E-171 | Loss | Gain |
| Chr22_CNVR_57 | Chr22 | 61154176 | 61163866 | 9691  | -0.8366299 | 0.55995  | 8.18E-179 | Loss | Gain |
| Chr22_CNVR_58 | Chr22 | 61173558 | 61198224 | 24667 | -0.9565455 | 0.515289 | 0         | Loss | Gain |
| Chr22_CNVR_59 | Chr22 | 61213202 | 61222012 | 8811  | -0.9800737 | 0.506954 | 2.31E-211 | Loss | Gain |
| Chr22_CNVR_60 | Chr22 | 61223774 | 61236108 | 12335 | -1.00298   | 0.498968 | 3.05E-306 | Loss | Gain |
| Chr22_CNVR_61 | Chr22 | 61244918 | 61253728 | 8811  | -0.879339  | 0.543616 | 6.46E-177 | Loss | Gain |
| Chr22_CNVR_62 | Chr22 | 61254610 | 61274872 | 20263 | -0.9449723 | 0.51944  | 0         | Loss | Gain |
| Chr23_CNVR_19 | Chr23 | 7080994  | 7103943  | 22950 | -1.046376  | 0.484183 | 0         | Loss | Gain |
| Chr23_CNVR_20 | Chr23 | 7831918  | 7842015  | 10098 | -0.8418735 | 0.557919 | 1.05E-180 | Loss | Gain |
| Chr23_CNVR_21 | Chr23 | 7866802  | 7875981  | 9180  | -0.8133906 | 0.569043 | 3.64E-155 | Loss | Gain |
| Chr23_CNVR_22 | Chr23 | 8132104  | 8142201  | 10098 | -0.9076548 | 0.533051 | 6.86E-205 | Loss | Gain |
| Chr23_CNVR_23 | Chr23 | 8143120  | 8161479  | 18360 | -0.9006749 | 0.535636 | 0         | Loss | Gain |
| Chr23_CNVR_24 | Chr23 | 17875756 | 17886771 | 11016 | -0.897773  | 0.536715 | 2.59E-219 | Loss | Gain |
| Chr23_CNVR_1  | Chr23 | 18577108 | 18586287 | 9180  | 1.092774   | 2.13284  | 2.98E-289 | Gain | Loss |
| Chr23_CNVR_2  | Chr23 | 25332670 | 25346439 | 13770 | 3.649269   | 12.547   | 0         | Gain | Loss |
| Chr23_CNVR_3  | Chr23 | 25348276 | 25362045 | 13770 | 3.097601   | 8.55994  | 0         | Gain | Loss |
| Chr23_CNVR_4  | Chr23 | 25717312 | 25742097 | 24786 | 1.200541   | 2.29826  | 0         | Gain | Loss |
| Chr23_CNVR_25 | Chr23 | 25748524 | 25758621 | 10098 | -2.415758  | 0.187406 | 0         | Loss | Gain |
| Chr23_CNVR_26 | Chr23 | 25779736 | 25797177 | 17442 | -1.656836  | 0.317134 | 0         | Loss | Gain |
| Chr23_CNVR_27 | Chr23 | 25799014 | 25849503 | 50490 | -2.05886   | 0.240006 | 0         | Loss | Gain |
| Chr23_CNVR_28 | Chr23 | 25917436 | 25996383 | 78948 | -2.937735  | 0.130513 | 0         | Loss | Gain |
| Chr23_CNVR_29 | Chr23 | 25997302 | 26008317 | 11016 | -1.795427  | 0.288086 | 0         | Loss | Gain |
| Chr23_CNVR_30 | Chr23 | 26010154 | 26042283 | 32130 | -1.679408  | 0.312211 | 0         | Loss | Gain |
| Chr23_CNVR_31 | Chr23 | 26047792 | 26127657 | 79866 | -3.229999  | 0.106579 | 0         | Loss | Gain |
| Chr23_CNVR_32 | Chr23 | 26133166 | 26144181 | 11016 | -1.287947  | 0.409533 | 0         | Loss | Gain |
| Chr23_CNVR_33 | Chr23 | 26149690 | 26178147 | 28458 | -2.811865  | 0.142411 | 0         | Loss | Gain |
| Chr23_CNVR_34 | Chr23 | 26191000 | 26208441 | 17442 | -2.672903  | 0.156811 | 0         | Loss | Gain |
| Chr23_CNVR_35 | Chr23 | 26211196 | 26231391 | 20196 | -3.13605   | 0.113751 | 0         | Loss | Gain |
| Chr23_CNVR_36 | Chr23 | 26275456 | 26286471 | 11016 | -1.813892  | 0.284423 | 0         | Loss | Gain |
| Chr23_CNVR_37 | Chr23 | 26305750 | 26316765 | 11016 | -1.777829  | 0.291622 | 0         | Loss | Gain |
| Chr23_CNVR_5  | Chr23 | 26364502 | 26373681 | 9180  | 0.9772837  | 1.96876  | 1.15E-239 | Gain | Loss |
| Chr23_CNVR_6  | Chr23 | 26493022 | 26519643 | 26622 | 1.122037   | 2.17654  | 0         | Gain | Loss |
| Chr23_CNVR_7  | Chr23 | 26520562 | 26535249 | 14688 | 1.569586   | 2.9682   | 0         | Gain | Loss |
| Chr23_CNVR_8  | Chr23 | 26549938 | 26559117 | 9180  | 0.8291975  | 1.7767   | 9.92E-180 | Gain | Loss |
| Chr23_CNVR_9  | Chr23 | 26568298 | 26578395 | 10098 | 0.9355486  | 1.91262  | 2.62E-244 | Gain | Loss |
| Chr23_CNVR_10 | Chr23 | 26589412 | 26616033 | 26622 | 1.087525   | 2.12509  | 0         | Gain | Loss |
| Chr23_CNVR_11 | Chr23 | 26889598 | 26903367 | 13770 | 0.9677863  | 1.95584  | 0         | Gain | Loss |
| Chr23_CNVR_38 | Chr23 | 27653374 | 27662553 | 9180  | -1.077739  | 0.473771 | 1.05E-245 | Loss | Gain |

|               |       |          |          |       |            |          |           |      |      |
|---------------|-------|----------|----------|-------|------------|----------|-----------|------|------|
| Chr23_CNVR_39 | Chr23 | 27663472 | 27687339 | 23868 | -1.787172  | 0.289739 | 0         | Loss | Gain |
| Chr23_CNVR_12 | Chr23 | 27845236 | 27856251 | 11016 | 0.8096814  | 1.75282  | 2.92E-206 | Gain | Loss |
| Chr23_CNVR_13 | Chr23 | 28455706 | 28473147 | 17442 | 1.028115   | 2.03936  | 0         | Gain | Loss |
| Chr23_CNVR_40 | Chr23 | 28821070 | 28850445 | 29376 | -1.765859  | 0.294052 | 0         | Loss | Gain |
| Chr23_CNVR_14 | Chr23 | 29009260 | 29018439 | 9180  | 0.8486732  | 1.80084  | 2.56E-187 | Gain | Loss |
| Chr23_CNVR_15 | Chr23 | 29779462 | 29812509 | 33048 | 3.512487   | 11.4121  | 0         | Gain | Loss |
| Chr23_CNVR_16 | Chr23 | 30394522 | 30404619 | 10098 | 0.9875075  | 1.98276  | 3.72E-268 | Gain | Loss |
| Chr23_CNVR_17 | Chr23 | 43417270 | 43430121 | 12852 | 1.141618   | 2.20628  | 0         | Gain | Loss |
| Chr23_CNVR_18 | Chr23 | 43472350 | 43483365 | 11016 | 1.007447   | 2.01035  | 1.78E-302 | Gain | Loss |
| Chr23_CNVR_41 | Chr23 | 48973924 | 48988611 | 14688 | -0.8675383 | 0.548081 | 1.76E-275 | Loss | Gain |
| Chr23_CNVR_42 | Chr23 | 50253616 | 50262795 | 9180  | -0.8350035 | 0.560582 | 3.29E-162 | Loss | Gain |
| Chr23_CNVR_43 | Chr23 | 50272894 | 50283909 | 11016 | -0.9227378 | 0.527507 | 1.76E-229 | Loss | Gain |
| Chr23_CNVR_44 | Chr23 | 50286664 | 50300433 | 13770 | -0.8533202 | 0.553509 | 2.56E-251 | Loss | Gain |
| Chr23_CNVR_45 | Chr23 | 50311450 | 50321547 | 10098 | -0.909491  | 0.532373 | 1.42E-205 | Loss | Gain |
| Chr23_CNVR_46 | Chr23 | 51407542 | 51418557 | 11016 | -0.9261569 | 0.526258 | 7.02E-231 | Loss | Gain |
| Chr23_CNVR_47 | Chr23 | 51427738 | 51438753 | 11016 | -0.9116682 | 0.53157  | 5.85E-225 | Loss | Gain |
| Chr23_CNVR_48 | Chr23 | 51442426 | 51461703 | 19278 | -0.9265762 | 0.526105 | 0         | Loss | Gain |
| Chr23_CNVR_49 | Chr23 | 51486490 | 51497505 | 11016 | -0.8367676 | 0.559897 | 6.22E-195 | Loss | Gain |
| Chr24_CNVR_4  | Chr24 | 907975   | 916734   | 8760  | -1.025664  | 0.491184 | 1.90E-228 | Loss | Gain |
| Chr24_CNVR_5  | Chr24 | 929875   | 939510   | 9636  | -0.8583989 | 0.551564 | 3.17E-187 | Loss | Gain |
| Chr24_CNVR_6  | Chr24 | 964915   | 978054   | 13140 | -0.8167712 | 0.567711 | 7.55E-234 | Loss | Gain |
| Chr24_CNVR_7  | Chr24 | 1015723  | 1025358  | 9636  | -0.9628816 | 0.513031 | 1.15E-226 | Loss | Gain |
| Chr24_CNVR_8  | Chr24 | 1049011  | 1077042  | 28032 | -0.9749847 | 0.508745 | 0         | Loss | Gain |
| Chr24_CNVR_9  | Chr24 | 1080547  | 1093686  | 13140 | -0.9857988 | 0.504946 | 0         | Loss | Gain |
| Chr24_CNVR_10 | Chr24 | 1393279  | 1402038  | 8760  | -0.8164886 | 0.567822 | 1.69E-156 | Loss | Gain |
| Chr24_CNVR_1  | Chr24 | 10925035 | 10933794 | 8760  | 0.9933903  | 1.99086  | 7.27E-238 | Gain | Loss |
| Chr24_CNVR_11 | Chr24 | 19857607 | 19881258 | 23652 | -0.8359903 | 0.560198 | 0         | Loss | Gain |
| Chr24_CNVR_12 | Chr24 | 19885639 | 19909290 | 23652 | -0.8634002 | 0.549656 | 0         | Loss | Gain |
| Chr24_CNVR_13 | Chr24 | 19933819 | 19953090 | 19272 | -1.041877  | 0.485695 | 0         | Loss | Gain |
| Chr24_CNVR_14 | Chr24 | 19953967 | 19985502 | 31536 | -0.9677172 | 0.511314 | 0         | Loss | Gain |
| Chr24_CNVR_15 | Chr24 | 19987255 | 20002146 | 14892 | -0.9445247 | 0.519601 | 0         | Loss | Gain |
| Chr24_CNVR_16 | Chr24 | 20003023 | 20011782 | 8760  | -0.8445799 | 0.556873 | 8.91E-166 | Loss | Gain |
| Chr24_CNVR_17 | Chr24 | 20027551 | 20041566 | 14016 | -1.040475  | 0.486167 | 0         | Loss | Gain |
| Chr24_CNVR_18 | Chr24 | 20051203 | 20062590 | 11388 | -0.999403  | 0.500207 | 3.29E-284 | Loss | Gain |
| Chr24_CNVR_19 | Chr24 | 20070475 | 20080986 | 10512 | -0.8695337 | 0.547324 | 1.51E-208 | Loss | Gain |
| Chr24_CNVR_20 | Chr24 | 24850807 | 24866574 | 15768 | -1.352463  | 0.391623 | 0         | Loss | Gain |
| Chr24_CNVR_21 | Chr24 | 43198627 | 43207386 | 8760  | -0.8545958 | 0.55302  | 4.05E-169 | Loss | Gain |
| Chr24_CNVR_2  | Chr24 | 44177995 | 44194638 | 16644 | 2.616607   | 6.13306  | 0         | Gain | Loss |
| Chr24_CNVR_22 | Chr24 | 48995119 | 49010010 | 14892 | -0.8132517 | 0.569098 | 8.72E-263 | Loss | Gain |
| Chr24_CNVR_23 | Chr24 | 58117783 | 58126542 | 8760  | -0.8499222 | 0.554815 | 1.48E-167 | Loss | Gain |
| Chr24_CNVR_24 | Chr24 | 58137055 | 58145814 | 8760  | -0.8338108 | 0.561045 | 3.34E-162 | Loss | Gain |
| Chr24_CNVR_3  | Chr24 | 62414563 | 62423322 | 8760  | 1.070633   | 2.10035  | 1.67E-269 | Gain | Loss |
| Chr25_CNVR_4  | Chr25 | 501967   | 513343   | 11377 | -0.8507302 | 0.554504 | 2.85E-199 | Loss | Gain |
| Chr25_CNVR_5  | Chr25 | 2490871  | 2507935  | 17065 | -2.260729  | 0.208667 | 0         | Loss | Gain |
| Chr25_CNVR_1  | Chr25 | 19439215 | 19451539 | 12325 | 0.8482411  | 1.8003   | 1.82E-262 | Gain | Loss |
| Chr25_CNVR_2  | Chr25 | 19512211 | 19524535 | 12325 | 0.9633621  | 1.94985  | 0         | Gain | Loss |
| Chr25_CNVR_3  | Chr25 | 19556767 | 19566247 | 9481  | 0.8791736  | 1.83932  | 5.98E-216 | Gain | Loss |
| Chr25_CNVR_6  | Chr25 | 27264955 | 27281071 | 16117 | -0.9450192 | 0.519423 | 0         | Loss | Gain |
| Chr25_CNVR_7  | Chr25 | 41934307 | 41947579 | 13273 | -0.936665  | 0.522439 | 1.17E-271 | Loss | Gain |
| Chr25_CNVR_8  | Chr25 | 41983603 | 41993083 | 9481  | -0.9824496 | 0.50612  | 4.95E-210 | Loss | Gain |
| Chr29_CNVR_1  | Chr29 | 5650561  | 5660544  | 9984  | 0.9470678  | 1.92795  | 2.41E-296 | Gain | Loss |
| Chr29_CNVR_2  | Chr29 | 5748865  | 5756544  | 7680  | 0.927826   | 1.90241  | 1.89E-220 | Gain | Loss |
| Chr29_CNVR_3  | Chr29 | 8469121  | 8476800  | 7680  | 0.9147687  | 1.88527  | 4.59E-215 | Gain | Loss |
| Chr29_CNVR_4  | Chr29 | 9646465  | 9657216  | 10752 | 1.099957   | 2.14348  | 0         | Gain | Loss |
| Chr29_CNVR_5  | Chr29 | 19843201 | 19850880 | 7680  | 0.8661984  | 1.82285  | 2.26E-195 | Gain | Loss |
| Chr29_CNVR_6  | Chr29 | 20002177 | 20009856 | 7680  | 1.074075   | 2.10537  | 6.06E-283 | Gain | Loss |

|               |       |          |          |       |            |          |           |      |      |
|---------------|-------|----------|----------|-------|------------|----------|-----------|------|------|
| Chr29_CNVR_7  | Chr29 | 22119553 | 22131840 | 12288 | 1.256838   | 2.38971  | 0         | Gain | Loss |
| Chr29_CNVR_10 | Chr29 | 27060865 | 27068544 | 7680  | -4.117788  | 0.0576   | 0         | Loss | Gain |
| Chr29_CNVR_11 | Chr29 | 27391105 | 27404160 | 13056 | -1.678487  | 0.31241  | 0         | Loss | Gain |
| Chr29_CNVR_8  | Chr29 | 28027009 | 28040064 | 13056 | 2.600228   | 6.06382  | 0         | Gain | Loss |
| Chr29_CNVR_12 | Chr29 | 40712065 | 40721280 | 9216  | -0.9736189 | 0.509227 | 2.92E-250 | Loss | Gain |
| Chr29_CNVR_13 | Chr29 | 40725889 | 40735104 | 9216  | -0.8435396 | 0.557275 | 1.73E-197 | Loss | Gain |
| Chr29_CNVR_14 | Chr29 | 40779649 | 40789632 | 9984  | -0.8102339 | 0.570289 | 1.14E-199 | Loss | Gain |
| Chr29_CNVR_15 | Chr29 | 40888705 | 40897920 | 9216  | -0.9599311 | 0.514081 | 1.38E-244 | Loss | Gain |
| Chr29_CNVR_9  | Chr29 | 42514561 | 42576000 | 61440 | 4.582856   | 23.965   | 0         | Gain | Loss |
| Chr29_CNVR_16 | Chr29 | 42916225 | 42958464 | 42240 | -0.9365013 | 0.522498 | 0         | Loss | Gain |
| Chr29_CNVR_17 | Chr29 | 42966913 | 42974592 | 7680  | -0.8131219 | 0.569149 | 5.32E-155 | Loss | Gain |
| Chr29_CNVR_18 | Chr29 | 42977665 | 42986112 | 8448  | -0.9196855 | 0.528624 | 3.18E-209 | Loss | Gain |
| Chr29_CNVR_19 | Chr29 | 42992257 | 43001472 | 9216  | -0.8565381 | 0.552276 | 1.25E-202 | Loss | Gain |
| Chr29_CNVR_20 | Chr29 | 43069057 | 43076736 | 7680  | -0.8730868 | 0.545977 | 1.06E-174 | Loss | Gain |
| Chr29_CNVR_21 | Chr29 | 43142785 | 43153536 | 10752 | -0.9601211 | 0.514014 | 4.37E-285 | Loss | Gain |
| Chr29_CNVR_22 | Chr29 | 43181185 | 43189632 | 8448  | -0.9323878 | 0.52399  | 5.51E-214 | Loss | Gain |
| Chr29_CNVR_23 | Chr29 | 43524481 | 43532928 | 8448  | -0.8551373 | 0.552813 | 2.08E-185 | Loss | Gain |
| Chr29_CNVR_24 | Chr29 | 44432257 | 44444544 | 12288 | -0.8778833 | 0.544165 | 8.10E-281 | Loss | Gain |
| Chr29_CNVR_25 | Chr29 | 44956033 | 44966784 | 10752 | -0.8252734 | 0.564375 | 1.08E-221 | Loss | Gain |
| Chr29_CNVR_26 | Chr29 | 45924481 | 45932160 | 7680  | -0.8947633 | 0.537835 | 5.81E-182 | Loss | Gain |
| Chr29_CNVR_27 | Chr29 | 46203265 | 46211712 | 8448  | -0.9276545 | 0.525712 | 3.29E-212 | Loss | Gain |
| Chr29_CNVR_28 | Chr29 | 46944385 | 46955136 | 10752 | -0.9240514 | 0.527027 | 8.73E-268 | Loss | Gain |
| Chr29_CNVR_29 | Chr29 | 47932801 | 47941248 | 8448  | -0.9673908 | 0.51143  | 3.25E-227 | Loss | Gain |
| Chr29_CNVR_30 | Chr29 | 47952001 | 47961216 | 9216  | -0.8266205 | 0.563849 | 7.59E-191 | Loss | Gain |
| Chr29_CNVR_31 | Chr29 | 48027265 | 48036480 | 9216  | -0.8803187 | 0.543247 | 4.02E-212 | Loss | Gain |
| Chr29_CNVR_32 | Chr29 | 48285313 | 48295296 | 9984  | -0.8764368 | 0.544711 | 6.15E-228 | Loss | Gain |
| Chr29_CNVR_33 | Chr29 | 48355969 | 48364416 | 8448  | -0.8326619 | 0.561492 | 2.78E-177 | Loss | Gain |
| Chr29_CNVR_34 | Chr29 | 48391297 | 48402048 | 10752 | -0.8790127 | 0.543739 | 1.64E-246 | Loss | Gain |
| Chr29_CNVR_35 | Chr29 | 48513409 | 48533376 | 19968 | -0.9524072 | 0.516769 | 0         | Loss | Gain |
| Chr29_CNVR_36 | Chr29 | 48561793 | 48575616 | 13824 | -0.8619445 | 0.55021  | 4.21E-306 | Loss | Gain |
| Chr29_CNVR_37 | Chr29 | 48641665 | 48650880 | 9216  | -0.9397886 | 0.521309 | 2.77E-236 | Loss | Gain |
| Chr29_CNVR_38 | Chr29 | 48664705 | 48673920 | 9216  | -0.8958047 | 0.537447 | 2.33E-218 | Loss | Gain |
| Chr29_CNVR_39 | Chr29 | 49099393 | 49111680 | 12288 | -0.8481074 | 0.555513 | 5.12E-265 | Loss | Gain |
| Chr29_CNVR_40 | Chr29 | 49129345 | 49137024 | 7680  | -0.985344  | 0.505105 | 5.71E-213 | Loss | Gain |
| Chr29_CNVR_41 | Chr29 | 49353601 | 49361280 | 7680  | -0.9015995 | 0.535293 | 2.88E-184 | Loss | Gain |
| Chr29_CNVR_42 | Chr29 | 49368193 | 49392768 | 24576 | -0.9429569 | 0.520166 | 0         | Loss | Gain |
| Chr29_CNVR_43 | Chr29 | 49405825 | 49413504 | 7680  | -0.9342487 | 0.523315 | 2.34E-195 | Loss | Gain |
| Chr29_CNVR_44 | Chr29 | 49984129 | 49993344 | 9216  | -0.8588135 | 0.551406 | 1.56E-203 | Loss | Gain |
| Chr29_CNVR_45 | Chr29 | 50022529 | 50033280 | 10752 | -0.9704375 | 0.510351 | 4.52E-290 | Loss | Gain |
| Chr29_CNVR_46 | Chr29 | 50044033 | 50057088 | 13056 | -0.9424763 | 0.520339 | 0         | Loss | Gain |
| Chr29_CNVR_47 | Chr29 | 50057857 | 50075520 | 17664 | -0.9083853 | 0.532781 | 0         | Loss | Gain |
| Chr29_CNVR_48 | Chr29 | 50083969 | 50093184 | 9216  | -1.117694  | 0.46083  | 0         | Loss | Gain |
| Chr29_CNVR_49 | Chr29 | 50093953 | 50105472 | 11520 | -0.9270417 | 0.525936 | 2.75E-288 | Loss | Gain |
| Chr29_CNVR_50 | Chr29 | 50106241 | 50116992 | 10752 | -0.9270178 | 0.525944 | 3.36E-269 | Loss | Gain |
| Chr29_CNVR_51 | Chr29 | 50126977 | 50147712 | 20736 | -0.9915296 | 0.502944 | 0         | Loss | Gain |
| Chr29_CNVR_52 | Chr29 | 50160769 | 50173056 | 12288 | -1.176949  | 0.442286 | 0         | Loss | Gain |
| Chr29_CNVR_53 | Chr29 | 50186113 | 50193792 | 7680  | -0.9682762 | 0.511116 | 4.69E-207 | Loss | Gain |
| Chr29_CNVR_54 | Chr29 | 50200705 | 50209920 | 9216  | -0.8241376 | 0.56482  | 7.08E-190 | Loss | Gain |
| Chr29_CNVR_55 | Chr29 | 50229121 | 50239104 | 9984  | -1.024054  | 0.491733 | 8.68E-294 | Loss | Gain |
| Chr29_CNVR_56 | Chr29 | 50340481 | 50351232 | 10752 | -0.8749458 | 0.545274 | 1.30E-244 | Loss | Gain |
| Chr29_CNVR_57 | Chr29 | 50389633 | 50397312 | 7680  | -0.787874  | 0.579197 | 6.75E-147 | Loss | Gain |
| Chr29_CNVR_58 | Chr29 | 50434945 | 50446464 | 11520 | -0.8288907 | 0.562962 | 3.84E-239 | Loss | Gain |
| Chr29_CNVR_59 | Chr29 | 50523265 | 50536320 | 13056 | -0.9980256 | 0.500685 | 0         | Loss | Gain |
| Chr29_CNVR_60 | Chr29 | 50689921 | 50701440 | 11520 | -1.089745  | 0.469844 | 0         | Loss | Gain |
| Chr29_CNVR_61 | Chr29 | 50732929 | 50742912 | 9984  | -0.8794482 | 0.543575 | 3.03E-229 | Loss | Gain |
| Chr29_CNVR_62 | Chr29 | 50838145 | 50850432 | 12288 | -0.9595438 | 0.514219 | 0         | Loss | Gain |

|               |       |           |           |       |            |           |           |      |      |
|---------------|-------|-----------|-----------|-------|------------|-----------|-----------|------|------|
| Chr29_CNVR_63 | Chr29 | 50912641  | 50931072  | 18432 | -0.9377545 | 0.522045  | 0         | Loss | Gain |
| Chr29_CNVR_64 | Chr29 | 50961793  | 50970240  | 8448  | -1.014871  | 0.494873  | 2.21E-245 | Loss | Gain |
| Chr29_CNVR_65 | Chr29 | 50977153  | 50989440  | 12288 | -0.968806  | 0.510929  | 0         | Loss | Gain |
| Chr29_CNVR_66 | Chr29 | 51021697  | 51029376  | 7680  | -0.8322967 | 0.561634  | 3.11E-161 | Loss | Gain |
| Chr29_CNVR_67 | Chr29 | 51050113  | 51058560  | 8448  | -1.013151  | 0.495463  | 1.02E-244 | Loss | Gain |
| Chr29_CNVR_68 | Chr29 | 51084673  | 51095424  | 10752 | -0.8608245 | 0.550638  | 4.88E-238 | Loss | Gain |
| Chr29_CNVR_69 | Chr29 | 51100801  | 51110016  | 9216  | -0.878635  | 0.543882  | 1.90E-211 | Loss | Gain |
| Chr29_CNVR_70 | Chr29 | 51124609  | 51135360  | 10752 | -0.8825986 | 0.54239   | 3.43E-248 | Loss | Gain |
| Chr29_CNVR_71 | Chr29 | 51145345  | 51160704  | 15360 | -0.817415  | 0.567458  | 0         | Loss | Gain |
| Chr29_CNVR_72 | Chr29 | 51172225  | 51179904  | 7680  | -0.8188181 | 0.566906  | 7.61E-157 | Loss | Gain |
| Chr29_CNVR_73 | Chr29 | 51374209  | 51395712  | 21504 | -1.160891  | 0.447236  | 0         | Loss | Gain |
| Chr29_CNVR_74 | Chr29 | 51488641  | 51497856  | 9216  | -0.8872296 | 0.540651  | 6.70E-215 | Loss | Gain |
| Chr3_CNVR_1   | Chr3  | 8517629   | 8539028   | 21400 | 4.529865   | 23.1007   | 0         | Gain | Loss |
| Chr3_CNVR_2   | Chr3  | 8612645   | 8670852   | 58208 | 4.17149    | 18.0195   | 0         | Gain | Loss |
| Chr3_CNVR_3   | Chr3  | 8732485   | 8752172   | 19688 | 4.773873   | 27.3577   | 0         | Gain | Loss |
| Chr3_CNVR_9   | Chr3  | 11867157  | 11887700  | 20544 | -2.250975  | 0.210082  | 0         | Loss | Gain |
| Chr3_CNVR_10  | Chr3  | 11893693  | 11907388  | 13696 | -2.414851  | 0.187524  | 0         | Loss | Gain |
| Chr3_CNVR_11  | Chr3  | 13957509  | 13966068  | 8560  | -0.8083878 | 0.57102   | 7.58E-154 | Loss | Gain |
| Chr3_CNVR_12  | Chr3  | 13984901  | 14004588  | 19688 | -0.9374669 | 0.522149  | 0         | Loss | Gain |
| Chr3_CNVR_13  | Chr3  | 14010581  | 14040540  | 29960 | -0.8845957 | 0.541639  | 0         | Loss | Gain |
| Chr3_CNVR_14  | Chr3  | 14048245  | 14056804  | 8560  | -0.8487094 | 0.555281  | 3.64E-167 | Loss | Gain |
| Chr3_CNVR_15  | Chr3  | 14214309  | 14229716  | 15408 | -0.8972868 | 0.536895  | 0         | Loss | Gain |
| Chr3_CNVR_16  | Chr3  | 14692813  | 14701372  | 8560  | -0.9490073 | 0.517989  | 1.83E-201 | Loss | Gain |
| Chr3_CNVR_17  | Chr3  | 14702229  | 14714212  | 11984 | -0.862002  | 0.550189  | 1.97E-239 | Loss | Gain |
| Chr3_CNVR_18  | Chr3  | 15465781  | 15475196  | 9416  | -0.9424051 | 0.520365  | 7.21E-219 | Loss | Gain |
| Chr3_CNVR_19  | Chr3  | 15579629  | 15593324  | 13696 | -0.9181943 | 0.529171  | 5.89E-304 | Loss | Gain |
| Chr3_CNVR_20  | Chr3  | 15670365  | 15680636  | 10272 | -0.8826574 | 0.542367  | 6.62E-214 | Loss | Gain |
| Chr3_CNVR_21  | Chr3  | 33419525  | 33428084  | 8560  | -0.8652257 | 0.548961  | 1.05E-172 | Loss | Gain |
| Chr3_CNVR_4   | Chr3  | 40003877  | 40014148  | 10272 | 0.9294124  | 1.9045    | 5.69E-253 | Gain | Loss |
| Chr3_CNVR_22  | Chr3  | 47039341  | 47048756  | 9416  | -3.509299  | 0.0878205 | 0         | Loss | Gain |
| Chr3_CNVR_5   | Chr3  | 50102965  | 50111524  | 8560  | 0.9166606  | 1.88774   | 3.37E-206 | Gain | Loss |
| Chr3_CNVR_6   | Chr3  | 54780149  | 54799836  | 19688 | 3.057275   | 8.32399   | 0         | Gain | Loss |
| Chr3_CNVR_7   | Chr3  | 62694725  | 62711844  | 17120 | 1.306325   | 2.47311   | 0         | Gain | Loss |
| Chr3_CNVR_8   | Chr3  | 62821413  | 62831684  | 10272 | 1.098377   | 2.14114   | 0         | Gain | Loss |
| Chr3_CNVR_23  | Chr3  | 82711429  | 82720844  | 9416  | -0.8485322 | 0.555349  | 1.31E-183 | Loss | Gain |
| Chr3_CNVR_24  | Chr3  | 92434733  | 92444148  | 9416  | -0.8542697 | 0.553145  | 1.01E-185 | Loss | Gain |
| Chr3_CNVR_25  | Chr3  | 92549437  | 92559708  | 10272 | -0.9072378 | 0.533205  | 5.59E-224 | Loss | Gain |
| Chr3_CNVR_26  | Chr3  | 93517573  | 93526132  | 8560  | -0.8389813 | 0.559038  | 6.34E-164 | Loss | Gain |
| Chr3_CNVR_27  | Chr3  | 98987413  | 98997684  | 10272 | -0.8275737 | 0.563476  | 9.19E-192 | Loss | Gain |
| Chr3_CNVR_28  | Chr3  | 99013949  | 99022508  | 8560  | -0.8050774 | 0.572331  | 9.10E-153 | Loss | Gain |
| Chr3_CNVR_29  | Chr3  | 99810029  | 99822012  | 11984 | -0.8993992 | 0.53611   | 3.42E-257 | Loss | Gain |
| Chr3_CNVR_30  | Chr3  | 100214061 | 100226044 | 11984 | -0.859924  | 0.550982  | 1.87E-238 | Loss | Gain |
| Chr3_CNVR_31  | Chr3  | 100229469 | 100238884 | 9416  | -0.9129292 | 0.531106  | 1.21E-207 | Loss | Gain |
| Chr3_CNVR_32  | Chr3  | 102657085 | 102665644 | 8560  | -0.8060215 | 0.571957  | 4.48E-153 | Loss | Gain |
| Chr3_CNVR_33  | Chr3  | 103041429 | 103050844 | 9416  | -0.8789466 | 0.543764  | 7.20E-195 | Loss | Gain |
| Chr3_CNVR_34  | Chr3  | 103053413 | 103064540 | 11128 | -0.8586717 | 0.55146   | 5.00E-221 | Loss | Gain |
| Chr3_CNVR_35  | Chr3  | 103065397 | 103073956 | 8560  | -0.8200981 | 0.566403  | 1.11E-157 | Loss | Gain |
| Chr3_CNVR_36  | Chr3  | 105261893 | 105270452 | 8560  | -0.93944   | 0.521435  | 3.95E-198 | Loss | Gain |
| Chr3_CNVR_37  | Chr3  | 105304693 | 105314108 | 9416  | -0.8157694 | 0.568105  | 1.10E-171 | Loss | Gain |
| Chr3_CNVR_38  | Chr3  | 105710437 | 105725844 | 15408 | -3.746248  | 0.074519  | 0         | Loss | Gain |
| Chr3_CNVR_39  | Chr3  | 109475125 | 109485396 | 10272 | -0.9620159 | 0.513339  | 8.52E-247 | Loss | Gain |
| Chr3_CNVR_40  | Chr3  | 115180365 | 115188924 | 8560  | -0.8808246 | 0.543057  | 5.59E-178 | Loss | Gain |
| Chr3_CNVR_41  | Chr3  | 115205189 | 115213748 | 8560  | -0.9131846 | 0.531012  | 4.83E-189 | Loss | Gain |
| Chr3_CNVR_42  | Chr3  | 115685405 | 115693964 | 8560  | -0.776842  | 0.583643  | 1.19E-143 | Loss | Gain |
| Chr3_CNVR_43  | Chr3  | 115698245 | 115711084 | 12840 | -1.013572  | 0.495318  | 0         | Loss | Gain |
| Chr3_CNVR_44  | Chr3  | 115773573 | 115788980 | 15408 | -0.9146781 | 0.530462  | 0         | Loss | Gain |

|               |      |           |           |       |            |          |           |      |      |
|---------------|------|-----------|-----------|-------|------------|----------|-----------|------|------|
| Chr3_CNVR_45  | Chr3 | 115792405 | 115807812 | 15408 | -0.8316783 | 0.561875 | 5.02E-289 | Loss | Gain |
| Chr3_CNVR_46  | Chr3 | 115836917 | 115846332 | 9416  | -0.8835316 | 0.542039 | 1.40E-196 | Loss | Gain |
| Chr3_CNVR_47  | Chr3 | 115892557 | 115901116 | 8560  | -0.8468774 | 0.555987 | 1.49E-166 | Loss | Gain |
| Chr3_CNVR_48  | Chr3 | 116201573 | 116215268 | 13696 | -0.8489118 | 0.555203 | 2.58E-266 | Loss | Gain |
| Chr3_CNVR_49  | Chr3 | 116678365 | 116686924 | 8560  | -0.8444081 | 0.556939 | 9.92E-166 | Loss | Gain |
| Chr3_CNVR_50  | Chr3 | 117601989 | 117611404 | 9416  | -0.8753457 | 0.545123 | 1.58E-193 | Loss | Gain |
| Chr3_CNVR_51  | Chr3 | 117624245 | 117644788 | 20544 | -0.8855694 | 0.541274 | 0         | Loss | Gain |
| Chr3_CNVR_52  | Chr3 | 118095901 | 118104460 | 8560  | -0.8471432 | 0.555884 | 1.21E-166 | Loss | Gain |
| Chr3_CNVR_53  | Chr3 | 118135277 | 118147260 | 11984 | -0.8209273 | 0.566078 | 2.61E-220 | Loss | Gain |
| Chr3_CNVR_54  | Chr3 | 118205469 | 118214884 | 9416  | -0.975148  | 0.508688 | 1.75E-231 | Loss | Gain |
| Chr3_CNVR_55  | Chr3 | 118239709 | 118248268 | 8560  | -0.875848  | 0.544933 | 2.72E-176 | Loss | Gain |
| Chr3_CNVR_56  | Chr3 | 118681405 | 118695100 | 13696 | -0.9423208 | 0.520395 | 0         | Loss | Gain |
| Chr3_CNVR_57  | Chr3 | 118927077 | 118978436 | 51360 | -0.9330865 | 0.523737 | 0         | Loss | Gain |
| Chr3_CNVR_58  | Chr3 | 118987853 | 119003260 | 15408 | -0.8990391 | 0.536244 | 0         | Loss | Gain |
| Chr3_CNVR_59  | Chr3 | 119184733 | 119198428 | 13696 | -0.9585214 | 0.514584 | 0         | Loss | Gain |
| Chr3_CNVR_60  | Chr3 | 119220685 | 119231812 | 11128 | -0.8521243 | 0.553968 | 3.56E-218 | Loss | Gain |
| Chr3_CNVR_61  | Chr3 | 119357645 | 119367916 | 10272 | -0.8961033 | 0.537336 | 2.11E-219 | Loss | Gain |
| Chr3_CNVR_62  | Chr3 | 119395309 | 119405580 | 10272 | -0.8769722 | 0.544509 | 1.36E-211 | Loss | Gain |
| Chr3_CNVR_63  | Chr3 | 119763389 | 119771948 | 8560  | -0.8678922 | 0.547947 | 1.33E-173 | Loss | Gain |
| Chr3_CNVR_64  | Chr3 | 120239325 | 120251308 | 11984 | -0.8736723 | 0.545756 | 6.10E-245 | Loss | Gain |
| Chr3_CNVR_65  | Chr3 | 120266717 | 120276132 | 9416  | -0.9849371 | 0.505248 | 2.79E-235 | Loss | Gain |
| Chr3_CNVR_66  | Chr3 | 120276989 | 120295820 | 18832 | -0.9284439 | 0.525425 | 0         | Loss | Gain |
| Chr3_CNVR_67  | Chr3 | 120297533 | 120318076 | 20544 | -0.9478824 | 0.518393 | 0         | Loss | Gain |
| Chr3_CNVR_68  | Chr3 | 120342045 | 120356596 | 14552 | -0.9521161 | 0.516874 | 0         | Loss | Gain |
| Chr3_CNVR_69  | Chr3 | 120374573 | 120383132 | 8560  | -1.03366   | 0.488469 | 2.06E-231 | Loss | Gain |
| Chr3_CNVR_70  | Chr3 | 120390837 | 120401964 | 11128 | -0.9841655 | 0.505518 | 2.58E-277 | Loss | Gain |
| Chr3_CNVR_71  | Chr3 | 120411381 | 120431924 | 20544 | -0.936118  | 0.522637 | 0         | Loss | Gain |
| Chr3_CNVR_72  | Chr3 | 120445621 | 120455036 | 9416  | -0.9736296 | 0.509223 | 6.79E-231 | Loss | Gain |
| Chr3_CNVR_73  | Chr3 | 120486709 | 120508108 | 21400 | -0.9892523 | 0.503739 | 0         | Loss | Gain |
| Chr3_CNVR_74  | Chr3 | 120508965 | 120524372 | 15408 | -0.9947338 | 0.501828 | 0         | Loss | Gain |
| Chr3_CNVR_75  | Chr3 | 120548341 | 120557756 | 9416  | -1.095437  | 0.467994 | 8.08E-279 | Loss | Gain |
| Chr3_CNVR_76  | Chr3 | 120565461 | 120576588 | 11128 | -0.9437252 | 0.519889 | 7.12E-259 | Loss | Gain |
| Chr3_CNVR_77  | Chr3 | 120587717 | 120597988 | 10272 | -0.9073432 | 0.533166 | 5.06E-224 | Loss | Gain |
| Chr3_CNVR_78  | Chr3 | 120598845 | 120611684 | 12840 | -0.8808454 | 0.543049 | 6.29E-266 | Loss | Gain |
| Chr3_CNVR_79  | Chr3 | 120614253 | 120630516 | 16264 | -0.8969401 | 0.537025 | 0         | Loss | Gain |
| Chr3_CNVR_80  | Chr3 | 120648493 | 120659620 | 11128 | -0.9938859 | 0.502123 | 8.77E-282 | Loss | Gain |
| Chr3_CNVR_81  | Chr3 | 120679309 | 120704988 | 25680 | -1.008627  | 0.497019 | 0         | Loss | Gain |
| Chr3_CNVR_82  | Chr3 | 120709269 | 120717828 | 8560  | -0.884771  | 0.541573 | 2.55E-179 | Loss | Gain |
| Chr3_CNVR_83  | Chr3 | 120724677 | 120734092 | 9416  | -0.9073388 | 0.533168 | 1.58E-205 | Loss | Gain |
| Chr3_CNVR_84  | Chr3 | 120808565 | 120846228 | 37664 | -0.9620358 | 0.513332 | 0         | Loss | Gain |
| Chr3_CNVR_85  | Chr3 | 120847941 | 120881324 | 33384 | -0.9481395 | 0.5183   | 0         | Loss | Gain |
| Chr3_CNVR_86  | Chr3 | 120887317 | 120899300 | 11984 | -0.939067  | 0.52157  | 2.37E-276 | Loss | Gain |
| Chr3_CNVR_87  | Chr3 | 120900157 | 120924124 | 23968 | -1.027808  | 0.490455 | 0         | Loss | Gain |
| Chr3_CNVR_88  | Chr3 | 120971205 | 120983188 | 11984 | -0.8590023 | 0.551334 | 5.07E-238 | Loss | Gain |
| Chr3_CNVR_89  | Chr3 | 121064509 | 121073068 | 8560  | -0.9610933 | 0.513667 | 1.08E-205 | Loss | Gain |
| Chr3_CNVR_90  | Chr3 | 121080773 | 121094468 | 13696 | -0.8817866 | 0.542695 | 5.04E-284 | Loss | Gain |
| Chr3_CNVR_91  | Chr3 | 121114157 | 121126996 | 12840 | -0.9279018 | 0.525622 | 3.98E-290 | Loss | Gain |
| Chr3_CNVR_92  | Chr3 | 121141549 | 121150108 | 8560  | -0.8623958 | 0.550038 | 9.42E-172 | Loss | Gain |
| Chr3_CNVR_93  | Chr3 | 121151821 | 121173220 | 21400 | -0.9071399 | 0.533241 | 0         | Loss | Gain |
| Chr3_CNVR_94  | Chr3 | 121212597 | 121245980 | 33384 | -0.9674843 | 0.511397 | 0         | Loss | Gain |
| Chr3_CNVR_95  | Chr3 | 121246837 | 121269948 | 23112 | -0.9508793 | 0.517317 | 0         | Loss | Gain |
| Chr3_CNVR_96  | Chr3 | 121286213 | 121299908 | 13696 | -1.083189  | 0.471984 | 0         | Loss | Gain |
| Chr3_CNVR_97  | Chr3 | 121303333 | 121317884 | 14552 | -0.9298446 | 0.524915 | 0         | Loss | Gain |
| Chr3_CNVR_98  | Chr3 | 121319597 | 121328156 | 8560  | -0.9385738 | 0.521748 | 7.90E-198 | Loss | Gain |
| Chr3_CNVR_99  | Chr3 | 121356405 | 121364964 | 8560  | -0.8184707 | 0.567043 | 3.79E-157 | Loss | Gain |
| Chr3_CNVR_100 | Chr3 | 121411189 | 121430876 | 19688 | -1.462052  | 0.362976 | 0         | Loss | Gain |



|              |      |           |           |       |            |           |           |      |      |
|--------------|------|-----------|-----------|-------|------------|-----------|-----------|------|------|
| Chr4_CNVR_1  | Chr4 | 2846949   | 2855217   | 8269  | 1.154998   | 2.22684   | 2.11E-295 | Gain | Loss |
| Chr4_CNVR_2  | Chr4 | 19987351  | 19997273  | 9923  | 1.210833   | 2.31471   | 0         | Gain | Loss |
| Chr4_CNVR_3  | Chr4 | 28239983  | 28254041  | 14059 | 2.502788   | 5.6678    | 0         | Gain | Loss |
| Chr4_CNVR_9  | Chr4 | 30104869  | 30113965  | 9097  | -1.010064  | 0.496524  | 8.15E-246 | Loss | Gain |
| Chr4_CNVR_10 | Chr4 | 43480767  | 43490689  | 9923  | -1.203574  | 0.434198  | 0         | Loss | Gain |
| Chr4_CNVR_11 | Chr4 | 47480965  | 47497505  | 16541 | -1.127554  | 0.457691  | 0         | Loss | Gain |
| Chr4_CNVR_4  | Chr4 | 54383935  | 54395511  | 11577 | 1.037386   | 2.05251   | 0         | Gain | Loss |
| Chr4_CNVR_5  | Chr4 | 59801611  | 59810707  | 9097  | 1.092141   | 2.1319    | 7.65E-297 | Gain | Loss |
| Chr4_CNVR_12 | Chr4 | 65845327  | 65857731  | 12405 | -0.9575436 | 0.514933  | 2.24E-306 | Loss | Gain |
| Chr4_CNVR_13 | Chr4 | 65878407  | 65901563  | 23157 | -0.9125036 | 0.531262  | 0         | Loss | Gain |
| Chr4_CNVR_14 | Chr4 | 66061175  | 66071097  | 9923  | -0.8756015 | 0.545027  | 2.14E-211 | Loss | Gain |
| Chr4_CNVR_6  | Chr4 | 73983007  | 73997065  | 14059 | 1.165734   | 2.24347   | 0         | Gain | Loss |
| Chr4_CNVR_15 | Chr4 | 75484839  | 75493109  | 8271  | -0.8335548 | 0.561145  | 2.49E-162 | Loss | Gain |
| Chr4_CNVR_16 | Chr4 | 77775629  | 77790515  | 14887 | -0.912932  | 0.531105  | 0         | Loss | Gain |
| Chr4_CNVR_17 | Chr4 | 77792169  | 77802919  | 10751 | -0.9906343 | 0.503256  | 4.43E-281 | Loss | Gain |
| Chr4_CNVR_18 | Chr4 | 77817807  | 77829383  | 11577 | -0.8361495 | 0.560137  | 1.21E-227 | Loss | Gain |
| Chr4_CNVR_19 | Chr4 | 77830211  | 77838481  | 8271  | -0.9559645 | 0.515497  | 2.10E-204 | Loss | Gain |
| Chr4_CNVR_20 | Chr4 | 86737001  | 86745271  | 8271  | -3.909588  | 0.0665421 | 0         | Loss | Gain |
| Chr4_CNVR_7  | Chr4 | 90632999  | 90642095  | 9097  | 1.25533    | 2.38722   | 0         | Gain | Loss |
| Chr4_CNVR_21 | Chr4 | 91970257  | 91982661  | 12405 | -0.9726345 | 0.509575  | 0         | Loss | Gain |
| Chr4_CNVR_22 | Chr4 | 91990105  | 92020703  | 30599 | -0.9319844 | 0.524137  | 0         | Loss | Gain |
| Chr4_CNVR_23 | Chr4 | 92027321  | 92036417  | 9097  | -0.8705717 | 0.54693   | 4.53E-192 | Loss | Gain |
| Chr4_CNVR_24 | Chr4 | 92043033  | 92053783  | 10751 | -0.8880494 | 0.540344  | 2.28E-234 | Loss | Gain |
| Chr4_CNVR_25 | Chr4 | 92071151  | 92085209  | 14059 | -0.8822772 | 0.54251   | 1.84E-302 | Loss | Gain |
| Chr4_CNVR_26 | Chr4 | 92091827  | 92104231  | 12405 | -0.8920409 | 0.538851  | 3.76E-272 | Loss | Gain |
| Chr4_CNVR_27 | Chr4 | 92111675  | 92148889  | 37215 | -1.01051   | 0.496371  | 0         | Loss | Gain |
| Chr4_CNVR_28 | Chr4 | 92149717  | 92172045  | 22329 | -1.023114  | 0.492053  | 0         | Loss | Gain |
| Chr4_CNVR_29 | Chr4 | 92172873  | 92186931  | 14059 | -1.081905  | 0.472405  | 0         | Loss | Gain |
| Chr4_CNVR_30 | Chr4 | 92191067  | 92199335  | 8269  | -0.9867505 | 0.504613  | 2.53E-215 | Loss | Gain |
| Chr4_CNVR_31 | Chr4 | 92205953  | 92257225  | 51273 | -1.019173  | 0.493399  | 0         | Loss | Gain |
| Chr4_CNVR_32 | Chr4 | 92258053  | 92274593  | 16541 | -0.9965615 | 0.501193  | 0         | Loss | Gain |
| Chr4_CNVR_33 | Chr4 | 93616815  | 93636661  | 19847 | -0.9181754 | 0.529178  | 0         | Loss | Gain |
| Chr4_CNVR_34 | Chr4 | 96588225  | 96597321  | 9097  | -0.8194139 | 0.566672  | 3.41E-173 | Loss | Gain |
| Chr4_CNVR_35 | Chr4 | 96622959  | 96635363  | 12405 | -0.8523508 | 0.553881  | 6.73E-252 | Loss | Gain |
| Chr4_CNVR_36 | Chr4 | 98732637  | 98747521  | 14885 | -1.21676   | 0.430248  | 0         | Loss | Gain |
| Chr4_CNVR_37 | Chr4 | 106471703 | 106482453 | 10751 | -0.9093475 | 0.532426  | 6.58E-244 | Loss | Gain |
| Chr4_CNVR_38 | Chr4 | 106506437 | 106521321 | 14885 | -0.8778092 | 0.544193  | 0         | Loss | Gain |
| Chr4_CNVR_39 | Chr4 | 106638757 | 106660257 | 21501 | -1.506265  | 0.352021  | 0         | Loss | Gain |
| Chr4_CNVR_40 | Chr4 | 106690031 | 106705743 | 15713 | -1.585597  | 0.333187  | 0         | Loss | Gain |
| Chr4_CNVR_41 | Chr4 | 106708225 | 106716493 | 8269  | -1.206437  | 0.433338  | 1.68E-295 | Loss | Gain |
| Chr4_CNVR_42 | Chr4 | 106753709 | 106765287 | 11579 | -1.25567   | 0.418799  | 0         | Loss | Gain |
| Chr4_CNVR_43 | Chr4 | 106767769 | 106779345 | 11577 | -2.105664  | 0.232344  | 0         | Loss | Gain |
| Chr4_CNVR_44 | Chr4 | 106857911 | 106870315 | 12405 | -1.546059  | 0.342444  | 0         | Loss | Gain |
| Chr4_CNVR_8  | Chr4 | 109595281 | 109606031 | 10751 | 1.231035   | 2.34735   | 0         | Gain | Loss |
| Chr4_CNVR_45 | Chr4 | 113443313 | 113452409 | 9097  | -0.9050216 | 0.534025  | 4.61E-205 | Loss | Gain |
| Chr4_CNVR_46 | Chr4 | 113453237 | 113473911 | 20675 | -0.9870072 | 0.504523  | 0         | Loss | Gain |
| Chr4_CNVR_47 | Chr4 | 113645927 | 113655023 | 9097  | -1.230598  | 0.426141  | 0         | Loss | Gain |
| Chr4_CNVR_48 | Chr4 | 113656679 | 113669909 | 13231 | -1.503431  | 0.352714  | 0         | Loss | Gain |
| Chr4_CNVR_49 | Chr4 | 113670737 | 113683141 | 12405 | -0.9922454 | 0.502695  | 0         | Loss | Gain |
| Chr4_CNVR_50 | Chr4 | 113692239 | 113702163 | 9925  | -1.007277  | 0.497484  | 9.09E-267 | Loss | Gain |
| Chr4_CNVR_51 | Chr4 | 113950263 | 113961013 | 10751 | -1.279362  | 0.411978  | 0         | Loss | Gain |
| Chr4_CNVR_52 | Chr4 | 114337299 | 114350531 | 13233 | -0.8039956 | 0.572761  | 7.48E-243 | Loss | Gain |
| Chr4_CNVR_53 | Chr4 | 114358801 | 114415037 | 56237 | -1.081713  | 0.472468  | 0         | Loss | Gain |
| Chr4_CNVR_54 | Chr4 | 114415865 | 114429923 | 14059 | -1.102349  | 0.465758  | 0         | Loss | Gain |
| Chr4_CNVR_55 | Chr4 | 114439021 | 114448117 | 9097  | -1.057594  | 0.480433  | 1.08E-264 | Loss | Gain |
| Chr4_CNVR_56 | Chr4 | 114458869 | 114500217 | 41349 | -1.078966  | 0.473368  | 0         | Loss | Gain |

|               |      |           |           |       |            |          |           |      |      |
|---------------|------|-----------|-----------|-------|------------|----------|-----------|------|------|
| Chr4_CNVR_57  | Chr4 | 114503527 | 114515931 | 12405 | -1.031602  | 0.489167 | 0         | Loss | Gain |
| Chr4_CNVR_58  | Chr4 | 114525029 | 114559761 | 34733 | -0.9155917 | 0.530126 | 0         | Loss | Gain |
| Chr4_CNVR_59  | Chr4 | 114565551 | 114593669 | 28119 | -0.9633724 | 0.512857 | 0         | Loss | Gain |
| Chr4_CNVR_60  | Chr4 | 114657349 | 114667271 | 9923  | -0.9146494 | 0.530473 | 1.63E-227 | Loss | Gain |
| Chr4_CNVR_61  | Chr4 | 114764031 | 114776435 | 12405 | -0.8858553 | 0.541167 | 5.73E-269 | Loss | Gain |
| Chr4_CNVR_62  | Chr4 | 114990629 | 115003033 | 12405 | -0.8668504 | 0.548343 | 2.99E-259 | Loss | Gain |
| Chr4_CNVR_63  | Chr4 | 115003861 | 115013785 | 9925  | -0.9620483 | 0.513328 | 1.93E-247 | Loss | Gain |
| Chr4_CNVR_64  | Chr4 | 115014613 | 115023709 | 9097  | -0.8678976 | 0.547945 | 4.53E-191 | Loss | Gain |
| Chr4_CNVR_65  | Chr4 | 115051827 | 115071675 | 19849 | -0.8971311 | 0.536953 | 0         | Loss | Gain |
| Chr4_CNVR_66  | Chr4 | 115073329 | 115089041 | 15713 | -0.9343813 | 0.523267 | 0         | Loss | Gain |
| Chr4_CNVR_67  | Chr4 | 115098967 | 115125429 | 26463 | -0.9066255 | 0.533431 | 0         | Loss | Gain |
| Chr4_CNVR_68  | Chr4 | 115126257 | 115135353 | 9097  | -0.8474752 | 0.555756 | 1.75E-183 | Loss | Gain |
| Chr4_CNVR_69  | Chr4 | 115150241 | 115166779 | 16539 | -0.8764297 | 0.544714 | 0         | Loss | Gain |
| Chr4_CNVR_70  | Chr4 | 117543579 | 117551847 | 8269  | -0.8092347 | 0.570685 | 2.80E-154 | Loss | Gain |
| Chr4_CNVR_71  | Chr4 | 117555157 | 117565079 | 9923  | -0.9563138 | 0.515372 | 5.19E-245 | Loss | Gain |
| Chr4_CNVR_72  | Chr4 | 117598987 | 117608911 | 9925  | -0.8431693 | 0.557418 | 3.06E-198 | Loss | Gain |
| Chr4_CNVR_73  | Chr4 | 117651915 | 117661011 | 9097  | -0.8285967 | 0.563077 | 1.53E-176 | Loss | Gain |
| Chr4_CNVR_74  | Chr4 | 117663493 | 117675897 | 12405 | -1.140034  | 0.453749 | 0         | Loss | Gain |
| Chr4_CNVR_75  | Chr4 | 117782581 | 117794985 | 12405 | -0.8782515 | 0.544026 | 4.54E-265 | Loss | Gain |
| Chr4_CNVR_76  | Chr4 | 117829721 | 117840471 | 10751 | -0.7727345 | 0.585307 | 1.53E-184 | Loss | Gain |
| Chr4_CNVR_77  | Chr4 | 117855357 | 117899187 | 43831 | -0.9218567 | 0.527829 | 0         | Loss | Gain |
| Chr4_CNVR_78  | Chr4 | 117909113 | 117971963 | 62851 | -0.9524096 | 0.516769 | 0         | Loss | Gain |
| Chr4_CNVR_79  | Chr4 | 117975273 | 117986849 | 11577 | -1.019785  | 0.49319  | 0         | Loss | Gain |
| Chr4_CNVR_80  | Chr4 | 117990159 | 118006697 | 16539 | -0.9265838 | 0.526103 | 0         | Loss | Gain |
| Chr4_CNVR_81  | Chr4 | 118007525 | 118028199 | 20675 | -0.8703538 | 0.547013 | 0         | Loss | Gain |
| Chr4_CNVR_82  | Chr4 | 118102631 | 118110899 | 8269  | -0.8258646 | 0.564144 | 9.00E-160 | Loss | Gain |
| Chr4_CNVR_83  | Chr4 | 118247355 | 118258105 | 10751 | -0.9178183 | 0.529309 | 9.97E-248 | Loss | Gain |
| Chr4_CNVR_84  | Chr4 | 118267203 | 118277127 | 9925  | -1.029894  | 0.489746 | 1.58E-276 | Loss | Gain |
| Chr4_CNVR_85  | Chr4 | 118292841 | 118304417 | 11577 | -0.8800515 | 0.543348 | 2.11E-248 | Loss | Gain |
| Chr4_CNVR_86  | Chr4 | 118317651 | 118329227 | 11577 | -0.9802799 | 0.506881 | 2.26E-297 | Loss | Gain |
| Chr4_CNVR_87  | Chr4 | 118330883 | 118349075 | 18193 | -0.8945417 | 0.537918 | 0         | Loss | Gain |
| Chr4_CNVR_88  | Chr4 | 118349903 | 118363961 | 14059 | -0.9402874 | 0.521129 | 0         | Loss | Gain |
| Chr4_CNVR_89  | Chr4 | 118369751 | 118394561 | 24811 | -0.9240529 | 0.527026 | 0         | Loss | Gain |
| Chr4_CNVR_90  | Chr4 | 118398697 | 118408619 | 9923  | -0.8651933 | 0.548973 | 3.77E-207 | Loss | Gain |
| Chr4_CNVR_91  | Chr4 | 118409447 | 118419371 | 9925  | -0.8656828 | 0.548787 | 2.39E-207 | Loss | Gain |
| Chr4_CNVR_92  | Chr4 | 118421025 | 118431775 | 10751 | -0.8829516 | 0.542257 | 4.24E-232 | Loss | Gain |
| Chr4_CNVR_93  | Chr4 | 118432603 | 118445007 | 12405 | -0.9098764 | 0.532231 | 2.23E-281 | Loss | Gain |
| Chr4_CNVR_94  | Chr4 | 118800619 | 118819639 | 19021 | -1.264707  | 0.416184 | 0         | Loss | Gain |
| Chr4_CNVR_95  | Chr4 | 119139689 | 119157055 | 17367 | -0.9081512 | 0.532868 | 0         | Loss | Gain |
| Chr4_CNVR_96  | Chr4 | 119161191 | 119188481 | 27291 | -0.8932426 | 0.538403 | 0         | Loss | Gain |
| Chr4_CNVR_97  | Chr4 | 119190135 | 119199231 | 9097  | -0.9221639 | 0.527717 | 1.33E-211 | Loss | Gain |
| Chr4_CNVR_98  | Chr4 | 119385307 | 119396885 | 11579 | -0.8794539 | 0.543573 | 4.08E-248 | Loss | Gain |
| Chr4_CNVR_99  | Chr4 | 119425831 | 119444023 | 18193 | -0.8933938 | 0.538346 | 0         | Loss | Gain |
| Chr4_CNVR_100 | Chr4 | 119450641 | 119459737 | 9097  | -1.096164  | 0.467759 | 3.70E-280 | Loss | Gain |
| Chr4_CNVR_101 | Chr4 | 119474623 | 119482893 | 8271  | -1.039345  | 0.486548 | 3.28E-234 | Loss | Gain |
| Chr4_CNVR_102 | Chr4 | 119485375 | 119555669 | 70295 | -1.078725  | 0.473447 | 0         | Loss | Gain |
| Chr4_CNVR_103 | Chr4 | 119557323 | 119601981 | 44659 | -0.9438403 | 0.519847 | 0         | Loss | Gain |
| Chr4_CNVR_104 | Chr4 | 119605289 | 119614385 | 9097  | -0.9184056 | 0.529093 | 3.63E-210 | Loss | Gain |
| Chr4_CNVR_105 | Chr4 | 119615213 | 119629271 | 14059 | -0.9543434 | 0.516076 | 0         | Loss | Gain |
| Chr4_CNVR_106 | Chr4 | 119643331 | 119651601 | 8271  | -0.9762292 | 0.508307 | 1.40E-211 | Loss | Gain |
| Chr4_CNVR_107 | Chr4 | 119661525 | 119683027 | 21503 | -1.032318  | 0.488924 | 0         | Loss | Gain |
| Chr4_CNVR_108 | Chr4 | 119684681 | 119703701 | 19021 | -0.9352937 | 0.522936 | 0         | Loss | Gain |
| Chr4_CNVR_109 | Chr4 | 119704529 | 119725203 | 20675 | -1.36017   | 0.389536 | 0         | Loss | Gain |
| Chr4_CNVR_110 | Chr4 | 119726031 | 119745051 | 19021 | -0.975856  | 0.508438 | 0         | Loss | Gain |
| Chr4_CNVR_111 | Chr4 | 119746707 | 119756629 | 9923  | -0.9968436 | 0.501095 | 2.76E-262 | Loss | Gain |
| Chr4_CNVR_112 | Chr4 | 119767381 | 119781439 | 14059 | -0.8997859 | 0.535966 | 0         | Loss | Gain |

|               |      |           |           |       |            |          |           |      |      |
|---------------|------|-----------|-----------|-------|------------|----------|-----------|------|------|
| Chr4_CNVR_113 | Chr4 | 119823617 | 119833541 | 9925  | -0.9136158 | 0.530853 | 4.38E-227 | Loss | Gain |
| Chr4_CNVR_114 | Chr4 | 119868275 | 119907143 | 38869 | -0.9061146 | 0.53362  | 0         | Loss | Gain |
| Chr4_CNVR_115 | Chr4 | 119910453 | 119931127 | 20675 | -0.9276752 | 0.525705 | 0         | Loss | Gain |
| Chr4_CNVR_116 | Chr4 | 119943533 | 119961725 | 18193 | -0.9888373 | 0.503884 | 0         | Loss | Gain |
| Chr4_CNVR_117 | Chr4 | 119974131 | 119985709 | 11579 | -0.8730997 | 0.545973 | 4.40E-245 | Loss | Gain |
| Chr4_CNVR_118 | Chr4 | 119995633 | 120036983 | 41351 | -0.981172  | 0.506568 | 0         | Loss | Gain |
| Chr4_CNVR_119 | Chr4 | 120043599 | 120070889 | 27291 | -0.897393  | 0.536856 | 0         | Loss | Gain |
| Chr4_CNVR_120 | Chr4 | 120128781 | 120137877 | 9097  | -0.96389   | 0.512673 | 1.03E-227 | Loss | Gain |
| Chr5_CNVR_1   | Chr5 | 4120364   | 4130792   | 10429 | 1.6969     | 3.24204  | 0         | Gain | Loss |
| Chr5_CNVR_14  | Chr5 | 26095636  | 26108670  | 13035 | -0.84499   | 0.556715 | 5.29E-248 | Loss | Gain |
| Chr5_CNVR_15  | Chr5 | 26186882  | 26196440  | 9559  | -0.9525808 | 0.516707 | 5.42E-223 | Loss | Gain |
| Chr5_CNVR_16  | Chr5 | 27891860  | 27900548  | 8689  | -0.8447789 | 0.556796 | 5.83E-166 | Loss | Gain |
| Chr5_CNVR_17  | Chr5 | 27917930  | 27929226  | 11297 | -0.950885  | 0.517315 | 2.24E-262 | Loss | Gain |
| Chr5_CNVR_18  | Chr5 | 27955296  | 27963986  | 8691  | -0.7812846 | 0.581848 | 3.88E-145 | Loss | Gain |
| Chr5_CNVR_19  | Chr5 | 27999616  | 28008304  | 8689  | -0.7770218 | 0.58357  | 9.07E-144 | Loss | Gain |
| Chr5_CNVR_20  | Chr5 | 32603578  | 32613136  | 9559  | -0.7975027 | 0.575344 | 3.26E-165 | Loss | Gain |
| Chr5_CNVR_21  | Chr5 | 32620088  | 32646158  | 26071 | -0.8741217 | 0.545586 | 0         | Loss | Gain |
| Chr5_CNVR_22  | Chr5 | 32648766  | 32658324  | 9559  | -0.8760664 | 0.544851 | 6.10E-194 | Loss | Gain |
| Chr5_CNVR_2   | Chr5 | 34572732  | 34581420  | 8689  | 0.8228503  | 1.7689   | 1.26E-169 | Gain | Loss |
| Chr5_CNVR_3   | Chr5 | 42119128  | 42128686  | 9559  | 0.8671578  | 1.82407  | 2.20E-204 | Gain | Loss |
| Chr5_CNVR_23  | Chr5 | 50326832  | 50337260  | 10429 | -0.9169219 | 0.529638 | 3.54E-228 | Loss | Gain |
| Chr5_CNVR_4   | Chr5 | 51419166  | 51427854  | 8689  | 0.959039   | 1.94401  | 2.98E-221 | Gain | Loss |
| Chr5_CNVR_24  | Chr5 | 56529754  | 56541920  | 12167 | -0.8747273 | 0.545357 | 1.27E-245 | Loss | Gain |
| Chr5_CNVR_25  | Chr5 | 56561908  | 56574942  | 13035 | -1.000873  | 0.499698 | 0         | Loss | Gain |
| Chr5_CNVR_26  | Chr5 | 56575812  | 56594928  | 19117 | -1.013708  | 0.495272 | 0         | Loss | Gain |
| Chr5_CNVR_27  | Chr5 | 56597536  | 56607094  | 9559  | -0.9355333 | 0.522849 | 1.93E-216 | Loss | Gain |
| Chr5_CNVR_28  | Chr5 | 56607964  | 56620130  | 12167 | -0.9406132 | 0.521011 | 2.28E-277 | Loss | Gain |
| Chr5_CNVR_29  | Chr5 | 56621000  | 56629688  | 8689  | -0.9232545 | 0.527318 | 1.09E-192 | Loss | Gain |
| Chr5_CNVR_5   | Chr5 | 58130452  | 58139142  | 8691  | 1.089848   | 2.12852  | 8.81E-274 | Gain | Loss |
| Chr5_CNVR_6   | Chr5 | 58141750  | 58153046  | 11297 | 2.687238   | 6.44079  | 0         | Gain | Loss |
| Chr5_CNVR_30  | Chr5 | 58161736  | 58170426  | 8691  | -0.8834265 | 0.542078 | 5.31E-179 | Loss | Gain |
| Chr5_CNVR_31  | Chr5 | 59112422  | 59127194  | 14773 | -3.060816  | 0.11984  | 0         | Loss | Gain |
| Chr5_CNVR_7   | Chr5 | 68968620  | 68977310  | 8691  | 1.053965   | 2.07623  | 3.70E-259 | Gain | Loss |
| Chr5_CNVR_32  | Chr5 | 73932348  | 73947990  | 15643 | -0.8716238 | 0.546531 | 0         | Loss | Gain |
| Chr5_CNVR_33  | Chr5 | 74062698  | 74073126  | 10429 | -0.8933845 | 0.53835  | 1.83E-218 | Loss | Gain |
| Chr5_CNVR_34  | Chr5 | 74632762  | 74666652  | 33891 | -1.658504  | 0.316767 | 0         | Loss | Gain |
| Chr5_CNVR_35  | Chr5 | 74820466  | 74834370  | 13905 | -0.9339997 | 0.523405 | 0         | Loss | Gain |
| Chr5_CNVR_36  | Chr5 | 75911930  | 75920620  | 8691  | -0.814412  | 0.56864  | 6.67E-156 | Loss | Gain |
| Chr5_CNVR_37  | Chr5 | 76186534  | 76210866  | 24333 | -0.9327747 | 0.52385  | 0         | Loss | Gain |
| Chr5_CNVR_38  | Chr5 | 76211736  | 76225638  | 13903 | -0.8933843 | 0.53835  | 1.43E-290 | Loss | Gain |
| Chr5_CNVR_8   | Chr5 | 76418558  | 76428984  | 10427 | 2.999126   | 7.99515  | 0         | Gain | Loss |
| Chr5_CNVR_39  | Chr5 | 103676480 | 103716454 | 39975 | -1.272412  | 0.413967 | 0         | Loss | Gain |
| Chr5_CNVR_40  | Chr5 | 104225688 | 104235246 | 9559  | -0.8441761 | 0.557029 | 3.95E-182 | Loss | Gain |
| Chr5_CNVR_41  | Chr5 | 104628904 | 104637594 | 8691  | -0.8466742 | 0.556065 | 1.36E-166 | Loss | Gain |
| Chr5_CNVR_42  | Chr5 | 106850938 | 106861364 | 10427 | -0.8921065 | 0.538827 | 6.13E-218 | Loss | Gain |
| Chr5_CNVR_43  | Chr5 | 107010834 | 107021260 | 10427 | -0.8717269 | 0.546492 | 1.29E-209 | Loss | Gain |
| Chr5_CNVR_44  | Chr5 | 107028214 | 107055152 | 26939 | -0.9963613 | 0.501263 | 0         | Loss | Gain |
| Chr5_CNVR_45  | Chr5 | 107056022 | 107122064 | 66043 | -1.015627  | 0.494613 | 0         | Loss | Gain |
| Chr5_CNVR_46  | Chr5 | 107122934 | 107151610 | 28677 | -0.9842102 | 0.505502 | 0         | Loss | Gain |
| Chr5_CNVR_47  | Chr5 | 107159432 | 107168990 | 9559  | -0.9815379 | 0.50644  | 3.29E-234 | Loss | Gain |
| Chr5_CNVR_48  | Chr5 | 107191586 | 107202012 | 10427 | -0.8606384 | 0.550709 | 4.01E-205 | Loss | Gain |
| Chr5_CNVR_49  | Chr5 | 107257630 | 107266318 | 8689  | -0.893597  | 0.53827  | 1.79E-182 | Loss | Gain |
| Chr5_CNVR_50  | Chr5 | 107589588 | 107600014 | 10427 | -0.9954012 | 0.501596 | 3.31E-261 | Loss | Gain |
| Chr5_CNVR_51  | Chr5 | 107600884 | 107613050 | 12167 | -0.7861248 | 0.5799   | 1.49E-204 | Loss | Gain |
| Chr5_CNVR_52  | Chr5 | 107622610 | 107632168 | 9559  | -0.8814412 | 0.542825 | 5.97E-196 | Loss | Gain |
| Chr5_CNVR_53  | Chr5 | 107637382 | 107646072 | 8691  | -0.8854457 | 0.54132  | 1.09E-179 | Loss | Gain |

|               |      |           |           |       |            |          |           |      |      |
|---------------|------|-----------|-----------|-------|------------|----------|-----------|------|------|
| Chr5_CNVR_54  | Chr5 | 107646942 | 107658238 | 11297 | -0.885681  | 0.541232 | 4.51E-233 | Loss | Gain |
| Chr5_CNVR_55  | Chr5 | 107918938 | 107927628 | 8691  | -0.8935854 | 0.538275 | 1.81E-182 | Loss | Gain |
| Chr5_CNVR_56  | Chr5 | 108542880 | 108554176 | 11297 | -0.835988  | 0.560199 | 2.55E-211 | Loss | Gain |
| Chr5_CNVR_57  | Chr5 | 108561998 | 108576770 | 14773 | -0.8479554 | 0.555572 | 1.81E-282 | Loss | Gain |
| Chr5_CNVR_58  | Chr5 | 108941752 | 108951310 | 9559  | -0.8153906 | 0.568255 | 1.21E-171 | Loss | Gain |
| Chr5_CNVR_59  | Chr5 | 109006058 | 109014746 | 8689  | -0.8508002 | 0.554477 | 5.63E-168 | Loss | Gain |
| Chr5_CNVR_60  | Chr5 | 109027782 | 109037340 | 9559  | -0.9459695 | 0.519081 | 1.90E-220 | Loss | Gain |
| Chr5_CNVR_61  | Chr5 | 109038210 | 109047768 | 9559  | -0.966612  | 0.511881 | 3.18E-228 | Loss | Gain |
| Chr5_CNVR_62  | Chr5 | 109056460 | 109067756 | 11297 | -0.8465513 | 0.556113 | 6.75E-216 | Loss | Gain |
| Chr5_CNVR_63  | Chr5 | 109127718 | 109137276 | 9559  | -0.8749496 | 0.545273 | 1.59E-193 | Loss | Gain |
| Chr5_CNVR_64  | Chr5 | 109206796 | 109217224 | 10429 | -0.8970367 | 0.536989 | 5.78E-220 | Loss | Gain |
| Chr5_CNVR_65  | Chr5 | 109242426 | 109262412 | 19987 | -0.9052661 | 0.533934 | 0         | Loss | Gain |
| Chr5_CNVR_66  | Chr5 | 109264150 | 109278922 | 14773 | -0.9089898 | 0.532558 | 0         | Loss | Gain |
| Chr5_CNVR_67  | Chr5 | 109288482 | 109302386 | 13905 | -0.8401856 | 0.558572 | 7.87E-262 | Loss | Gain |
| Chr5_CNVR_68  | Chr5 | 109384942 | 109396238 | 11297 | -0.9766796 | 0.508148 | 3.59E-274 | Loss | Gain |
| Chr5_CNVR_69  | Chr5 | 109397108 | 109407534 | 10427 | -0.8720535 | 0.546369 | 9.49E-210 | Loss | Gain |
| Chr5_CNVR_70  | Chr5 | 109419702 | 109428390 | 8689  | -1.078196  | 0.473621 | 9.26E-248 | Loss | Gain |
| Chr5_CNVR_71  | Chr5 | 109432736 | 109444032 | 11297 | -0.9000491 | 0.535868 | 1.84E-239 | Loss | Gain |
| Chr5_CNVR_72  | Chr5 | 109674318 | 109685614 | 11297 | -0.8289667 | 0.562932 | 2.72E-208 | Loss | Gain |
| Chr5_CNVR_73  | Chr5 | 109689960 | 109733410 | 43451 | -0.9102138 | 0.532106 | 0         | Loss | Gain |
| Chr5_CNVR_74  | Chr5 | 109734280 | 109750790 | 16511 | -0.9194974 | 0.528693 | 0         | Loss | Gain |
| Chr5_CNVR_75  | Chr5 | 109907210 | 109915900 | 8691  | -0.9029787 | 0.534781 | 1.09E-185 | Loss | Gain |
| Chr5_CNVR_76  | Chr5 | 109997586 | 110006276 | 8691  | -0.925118  | 0.526637 | 2.46E-193 | Loss | Gain |
| Chr5_CNVR_77  | Chr5 | 110012360 | 110022786 | 10427 | -0.9140869 | 0.53068  | 5.30E-227 | Loss | Gain |
| Chr5_CNVR_78  | Chr5 | 110023656 | 110036690 | 13035 | -0.9579228 | 0.514798 | 4.13E-306 | Loss | Gain |
| Chr5_CNVR_79  | Chr5 | 110241776 | 110261762 | 19987 | -0.850109  | 0.554743 | 0         | Loss | Gain |
| Chr5_CNVR_80  | Chr5 | 110315640 | 110326068 | 10429 | -0.8670844 | 0.548254 | 9.87E-208 | Loss | Gain |
| Chr5_CNVR_81  | Chr5 | 110351270 | 110359958 | 8689  | -0.8540951 | 0.553212 | 4.42E-169 | Loss | Gain |
| Chr5_CNVR_82  | Chr5 | 110478144 | 110491178 | 13035 | -0.8976118 | 0.536775 | 1.02E-274 | Loss | Gain |
| Chr5_CNVR_83  | Chr5 | 110557222 | 110569388 | 12167 | -0.8875472 | 0.540532 | 9.95E-252 | Loss | Gain |
| Chr5_CNVR_84  | Chr5 | 110866586 | 110877882 | 11297 | -0.9502489 | 0.517543 | 4.36E-262 | Loss | Gain |
| Chr5_CNVR_85  | Chr5 | 110890050 | 110899608 | 9559  | -0.8937613 | 0.538209 | 1.42E-200 | Loss | Gain |
| Chr5_CNVR_86  | Chr5 | 110907430 | 110917856 | 10427 | -0.8790482 | 0.543726 | 1.35E-212 | Loss | Gain |
| Chr5_CNVR_87  | Chr5 | 111361048 | 111370606 | 9559  | -0.9803257 | 0.506865 | 9.73E-234 | Loss | Gain |
| Chr5_CNVR_88  | Chr5 | 111380166 | 111389724 | 9559  | -0.8415211 | 0.558055 | 3.72E-181 | Loss | Gain |
| Chr5_CNVR_89  | Chr5 | 111398414 | 111410580 | 12167 | -0.9657609 | 0.512008 | 1.05E-289 | Loss | Gain |
| Chr5_CNVR_90  | Chr5 | 111425354 | 111434042 | 8689  | -0.8234455 | 0.565091 | 7.08E-159 | Loss | Gain |
| Chr5_CNVR_91  | Chr5 | 111475756 | 111487920 | 12165 | -0.8362768 | 0.560087 | 1.51E-227 | Loss | Gain |
| Chr5_CNVR_92  | Chr5 | 111506170 | 111522680 | 16511 | -0.8841971 | 0.541789 | 0         | Loss | Gain |
| Chr5_CNVR_93  | Chr5 | 111582642 | 111593938 | 11297 | -0.8664416 | 0.548498 | 1.38E-224 | Loss | Gain |
| Chr5_CNVR_94  | Chr5 | 111597416 | 111613926 | 16511 | -0.8863395 | 0.540985 | 0         | Loss | Gain |
| Chr5_CNVR_95  | Chr5 | 111616534 | 111627830 | 11297 | -0.9651721 | 0.512217 | 6.75E-269 | Loss | Gain |
| Chr5_CNVR_96  | Chr5 | 112933068 | 112945234 | 12167 | -0.8861074 | 0.541072 | 4.85E-251 | Loss | Gain |
| Chr5_CNVR_97  | Chr5 | 112993898 | 113008670 | 14773 | -0.824865  | 0.564535 | 2.01E-269 | Loss | Gain |
| Chr5_CNVR_98  | Chr5 | 113012148 | 113024312 | 12165 | -0.8231595 | 0.565203 | 1.82E-221 | Loss | Gain |
| Chr5_CNVR_99  | Chr5 | 113040824 | 113054728 | 13905 | -0.8409813 | 0.558264 | 2.96E-262 | Loss | Gain |
| Chr5_CNVR_100 | Chr5 | 113386686 | 113395376 | 8691  | -0.7905681 | 0.578116 | 3.94E-148 | Loss | Gain |
| Chr5_CNVR_101 | Chr5 | 113406674 | 113417100 | 10427 | -0.9815877 | 0.506422 | 2.50E-255 | Loss | Gain |
| Chr5_CNVR_102 | Chr5 | 113462290 | 113471848 | 9559  | -0.8594214 | 0.551174 | 9.42E-188 | Loss | Gain |
| Chr5_CNVR_103 | Chr5 | 113623924 | 113632612 | 8689  | -0.8303313 | 0.5624   | 3.74E-161 | Loss | Gain |
| Chr5_CNVR_104 | Chr5 | 113780344 | 113805544 | 25201 | -0.8918597 | 0.538919 | 0         | Loss | Gain |
| Chr5_CNVR_105 | Chr5 | 113816842 | 113826400 | 9559  | -0.9575818 | 0.514919 | 6.38E-225 | Loss | Gain |
| Chr5_CNVR_106 | Chr5 | 113835090 | 113843780 | 8691  | -0.8607337 | 0.550672 | 2.59E-171 | Loss | Gain |
| Chr5_CNVR_107 | Chr5 | 113854208 | 113862898 | 8691  | -0.8720367 | 0.546375 | 3.93E-175 | Loss | Gain |
| Chr5_CNVR_108 | Chr5 | 114021056 | 114031484 | 10429 | -0.9498149 | 0.517699 | 6.57E-242 | Loss | Gain |
| Chr5_CNVR_109 | Chr5 | 114509434 | 114532028 | 22595 | -0.8771037 | 0.544459 | 0         | Loss | Gain |

|               |      |           |           |        |            |           |           |      |      |
|---------------|------|-----------|-----------|--------|------------|-----------|-----------|------|------|
| Chr5_CNVR_110 | Chr5 | 114561574 | 114578954 | 17381  | -0.9568604 | 0.515177  | 0         | Loss | Gain |
| Chr5_CNVR_111 | Chr5 | 114603286 | 114625880 | 22595  | -1.03562   | 0.487806  | 0         | Loss | Gain |
| Chr5_CNVR_112 | Chr5 | 114631094 | 114662378 | 31285  | -0.9479593 | 0.518365  | 0         | Loss | Gain |
| Chr5_CNVR_113 | Chr5 | 114663248 | 114735374 | 72127  | -0.9877655 | 0.504258  | 0         | Loss | Gain |
| Chr5_CNVR_114 | Chr5 | 114763182 | 114781430 | 18249  | -0.8608928 | 0.550612  | 0         | Loss | Gain |
| Chr5_CNVR_115 | Chr5 | 114812716 | 114825750 | 13035  | -0.8070646 | 0.571544  | 3.30E-229 | Loss | Gain |
| Chr5_CNVR_116 | Chr5 | 114850082 | 114863116 | 13035  | -0.8648034 | 0.549121  | 5.58E-258 | Loss | Gain |
| Chr5_CNVR_117 | Chr5 | 115064726 | 115074284 | 9559   | -0.9566369 | 0.515257  | 1.48E-224 | Loss | Gain |
| Chr5_CNVR_118 | Chr5 | 115403636 | 115413194 | 9559   | -0.9660672 | 0.5119    | 3.34E-228 | Loss | Gain |
| Chr5_CNVR_119 | Chr5 | 115460120 | 115468810 | 8691   | -0.8860205 | 0.541105  | 6.94E-180 | Loss | Gain |
| Chr5_CNVR_120 | Chr5 | 115480976 | 115493142 | 12167  | -0.9331741 | 0.523705  | 9.69E-274 | Loss | Gain |
| Chr5_CNVR_121 | Chr5 | 115500964 | 115516604 | 15641  | -1.041999  | 0.485654  | 0         | Loss | Gain |
| Chr5_CNVR_122 | Chr5 | 115517474 | 115546150 | 28677  | -0.9525494 | 0.516719  | 0         | Loss | Gain |
| Chr5_CNVR_123 | Chr5 | 115547020 | 115565268 | 18249  | -0.9620237 | 0.513336  | 0         | Loss | Gain |
| Chr5_CNVR_124 | Chr5 | 115567876 | 115579172 | 11297  | -0.9906734 | 0.503243  | 1.30E-280 | Loss | Gain |
| Chr5_CNVR_125 | Chr5 | 115581780 | 115590470 | 8691   | -0.9335843 | 0.523556  | 2.82E-196 | Loss | Gain |
| Chr5_CNVR_126 | Chr5 | 115667812 | 115679108 | 11297  | -0.9107055 | 0.531925  | 3.17E-244 | Loss | Gain |
| Chr5_CNVR_127 | Chr5 | 115712130 | 115720820 | 8691   | -0.9424949 | 0.520332  | 2.21E-199 | Loss | Gain |
| Chr5_CNVR_128 | Chr5 | 115739938 | 115756448 | 16511  | -0.9071783 | 0.533227  | 0         | Loss | Gain |
| Chr5_CNVR_129 | Chr5 | 115769484 | 115778174 | 8691   | -0.9062219 | 0.533581  | 8.32E-187 | Loss | Gain |
| Chr5_CNVR_130 | Chr5 | 115929380 | 115942414 | 13035  | -0.9099678 | 0.532197  | 4.36E-281 | Loss | Gain |
| Chr5_CNVR_131 | Chr5 | 115945022 | 115962402 | 17381  | -0.8571915 | 0.552026  | 0         | Loss | Gain |
| Chr5_CNVR_132 | Chr5 | 115963272 | 115975436 | 12165  | -0.9480041 | 0.518349  | 5.55E-281 | Loss | Gain |
| Chr5_CNVR_133 | Chr5 | 115983258 | 115991948 | 8691   | -0.9121142 | 0.531406  | 7.76E-189 | Loss | Gain |
| Chr5_CNVR_134 | Chr5 | 115994556 | 116013672 | 19117  | -0.9975036 | 0.500866  | 0         | Loss | Gain |
| Chr5_CNVR_135 | Chr5 | 116015412 | 116033660 | 18249  | -1.001118  | 0.499613  | 0         | Loss | Gain |
| Chr5_CNVR_136 | Chr5 | 116040612 | 116076240 | 35629  | -0.9496929 | 0.517743  | 0         | Loss | Gain |
| Chr5_CNVR_137 | Chr5 | 116080586 | 116113608 | 33023  | -1.022646  | 0.492213  | 0         | Loss | Gain |
| Chr5_CNVR_138 | Chr5 | 116130988 | 116163140 | 32153  | -0.956358  | 0.515356  | 0         | Loss | Gain |
| Chr5_CNVR_139 | Chr5 | 116164010 | 116187472 | 23463  | -1.005617  | 0.498057  | 0         | Loss | Gain |
| Chr5_CNVR_140 | Chr5 | 116189212 | 116207460 | 18249  | -0.9505755 | 0.517426  | 0         | Loss | Gain |
| Chr5_CNVR_141 | Chr5 | 116608070 | 116616758 | 8689   | -0.78069   | 0.582088  | 6.03E-145 | Loss | Gain |
| Chr5_CNVR_142 | Chr5 | 116647174 | 116662816 | 15643  | -0.9039186 | 0.534433  | 0         | Loss | Gain |
| Chr5_CNVR_143 | Chr5 | 116923516 | 116935682 | 12167  | -0.9653338 | 0.51216   | 1.70E-289 | Loss | Gain |
| Chr5_CNVR_144 | Chr5 | 116954800 | 116968704 | 13905  | -0.9793114 | 0.507222  | 0         | Loss | Gain |
| Chr5_CNVR_145 | Chr5 | 116979132 | 116997380 | 18249  | -0.9572137 | 0.515051  | 0         | Loss | Gain |
| Chr5_CNVR_146 | Chr5 | 117018238 | 117039092 | 20855  | -0.9191872 | 0.528807  | 0         | Loss | Gain |
| Chr5_CNVR_147 | Chr5 | 117094710 | 117105136 | 10427  | -0.9149999 | 0.530344  | 2.22E-227 | Loss | Gain |
| Chr5_CNVR_148 | Chr5 | 117120780 | 117139896 | 19117  | -0.9198027 | 0.528581  | 0         | Loss | Gain |
| Chr5_CNVR_9   | Chr5 | 117265034 | 117283282 | 18249  | 1.230747   | 2.34688   | 0         | Gain | Loss |
| Chr5_CNVR_10  | Chr5 | 117309352 | 117320648 | 11297  | 1.109775   | 2.15812   | 0         | Gain | Loss |
| Chr5_CNVR_11  | Chr5 | 117331946 | 117475330 | 143385 | 1.507757   | 2.84368   | 0         | Gain | Loss |
| Chr5_CNVR_12  | Chr5 | 117484022 | 117502270 | 18249  | 1.553651   | 2.93559   | 0         | Gain | Loss |
| Chr5_CNVR_13  | Chr5 | 117504878 | 117514436 | 9559   | 1.339571   | 2.53076   | 0         | Gain | Loss |
| Chr5_CNVR_149 | Chr5 | 117585694 | 117637834 | 52141  | -4.290611  | 0.0510972 | 0         | Loss | Gain |
| Chr5_CNVR_150 | Chr5 | 117726472 | 117767314 | 40843  | -0.9423994 | 0.520367  | 0         | Loss | Gain |
| Chr5_CNVR_151 | Chr5 | 117775136 | 117824668 | 49533  | -1.020927  | 0.4928    | 0         | Loss | Gain |
| Chr5_CNVR_152 | Chr5 | 117825538 | 117853346 | 27809  | -0.9922325 | 0.502699  | 0         | Loss | Gain |
| Chr5_CNVR_153 | Chr5 | 117855084 | 117881154 | 26071  | -0.8907373 | 0.539338  | 0         | Loss | Gain |
| Chr5_CNVR_154 | Chr5 | 117882892 | 117906354 | 23463  | -1.002964  | 0.498974  | 0         | Loss | Gain |
| Chr5_CNVR_155 | Chr5 | 117908962 | 117928948 | 19987  | -1.002198  | 0.499239  | 0         | Loss | Gain |
| Chr5_CNVR_156 | Chr5 | 117936770 | 117947198 | 10429  | -0.9175915 | 0.529392  | 1.87E-228 | Loss | Gain |
| Chr5_CNVR_157 | Chr5 | 117957626 | 118001944 | 44319  | -1.03407   | 0.488331  | 0         | Loss | Gain |
| Chr5_CNVR_158 | Chr5 | 118002814 | 118021062 | 18249  | -1.111267  | 0.462887  | 0         | Loss | Gain |
| Chr5_CNVR_159 | Chr5 | 118021932 | 118047132 | 25201  | -1.040815  | 0.486053  | 0         | Loss | Gain |
| Chr5_CNVR_160 | Chr5 | 118055824 | 118067988 | 12165  | -0.9409442 | 0.520892  | 1.57E-277 | Loss | Gain |

|               |      |           |           |       |            |          |           |      |      |
|---------------|------|-----------|-----------|-------|------------|----------|-----------|------|------|
| Chr5_CNVR_161 | Chr5 | 118075810 | 118085368 | 9559  | -0.9751923 | 0.508672 | 9.64E-232 | Loss | Gain |
| Chr5_CNVR_162 | Chr5 | 118086238 | 118126212 | 39975 | -0.9747562 | 0.508826 | 0         | Loss | Gain |
| Chr5_CNVR_163 | Chr5 | 118174008 | 118183566 | 9559  | -0.9336761 | 0.523523 | 9.92E-216 | Loss | Gain |
| Chr5_CNVR_164 | Chr5 | 118193126 | 118204422 | 11297 | -0.8944797 | 0.537941 | 5.58E-237 | Loss | Gain |
| Chr5_CNVR_165 | Chr5 | 118210506 | 118222670 | 12165 | -0.8641518 | 0.549369 | 1.29E-240 | Loss | Gain |
| Chr5_CNVR_166 | Chr5 | 118246134 | 118255692 | 9559  | -0.8780486 | 0.544103 | 1.11E-194 | Loss | Gain |
| Chr5_CNVR_167 | Chr5 | 118271336 | 118286108 | 14773 | -0.9547966 | 0.515914 | 0         | Loss | Gain |
| Chr5_CNVR_168 | Chr5 | 118303488 | 118322606 | 19119 | -0.8732302 | 0.545923 | 0         | Loss | Gain |
| Chr5_CNVR_169 | Chr5 | 118331296 | 118345200 | 13905 | -0.9451572 | 0.519373 | 0         | Loss | Gain |
| Chr5_CNVR_170 | Chr5 | 118346070 | 118362580 | 16511 | -0.9708476 | 0.510206 | 0         | Loss | Gain |
| Chr5_CNVR_171 | Chr5 | 118406900 | 118416458 | 9559  | -0.8819723 | 0.542625 | 3.78E-196 | Loss | Gain |
| Chr5_CNVR_172 | Chr5 | 119430582 | 119443616 | 13035 | -0.9754266 | 0.508589 | 0         | Loss | Gain |
| Chr5_CNVR_173 | Chr5 | 119465342 | 119476638 | 11297 | -1.090538  | 0.469586 | 0         | Loss | Gain |
| Chr5_CNVR_174 | Chr5 | 119495756 | 119508790 | 13035 | -1.058814  | 0.480027 | 0         | Loss | Gain |
| Chr5_CNVR_175 | Chr5 | 119509660 | 119543550 | 33891 | -1.046359  | 0.484189 | 0         | Loss | Gain |
| Chr5_CNVR_176 | Chr5 | 119544420 | 119575704 | 31285 | -1.055389  | 0.481167 | 0         | Loss | Gain |
| Chr5_CNVR_177 | Chr5 | 119635666 | 119657390 | 21725 | -0.8679873 | 0.547911 | 0         | Loss | Gain |
| Chr5_CNVR_178 | Chr5 | 119673032 | 119682590 | 9559  | -0.8227184 | 0.565376 | 2.70E-174 | Loss | Gain |
| Chr5_CNVR_179 | Chr5 | 119781658 | 119791216 | 9559  | -0.9125763 | 0.531236 | 1.09E-207 | Loss | Gain |
| Chr5_CNVR_180 | Chr5 | 119792954 | 119802512 | 9559  | -0.973376  | 0.509313 | 4.89E-231 | Loss | Gain |
| Chr5_CNVR_181 | Chr5 | 119804252 | 119816416 | 12165 | -0.8898575 | 0.539667 | 7.83E-253 | Loss | Gain |
| Chr5_CNVR_182 | Chr5 | 119822500 | 119834666 | 12167 | -0.9715207 | 0.509968 | 1.51E-292 | Loss | Gain |
| Chr5_CNVR_183 | Chr5 | 119836404 | 119857260 | 20857 | -1.002348  | 0.499187 | 0         | Loss | Gain |
| Chr5_CNVR_184 | Chr5 | 119871164 | 119890282 | 19119 | -0.9847396 | 0.505317 | 0         | Loss | Gain |
| Chr5_CNVR_185 | Chr5 | 119941554 | 119951980 | 10427 | -0.9664127 | 0.511777 | 6.68E-249 | Loss | Gain |
| Chr5_CNVR_186 | Chr5 | 119971100 | 119982396 | 11297 | -0.9491347 | 0.517943 | 1.40E-261 | Loss | Gain |
| Chr5_CNVR_187 | Chr5 | 119987610 | 120004120 | 16511 | -0.9502336 | 0.517549 | 0         | Loss | Gain |
| Chr5_CNVR_188 | Chr5 | 120103188 | 120112746 | 9559  | -0.820737  | 0.566153 | 1.41E-173 | Loss | Gain |
| Chr5_CNVR_189 | Chr5 | 120303058 | 120318698 | 15641 | -0.8631588 | 0.549748 | 0         | Loss | Gain |
| Chr5_CNVR_190 | Chr5 | 120323914 | 120336078 | 12165 | -0.839148  | 0.558974 | 6.95E-229 | Loss | Gain |
| Chr5_CNVR_191 | Chr5 | 120349114 | 120358672 | 9559  | -0.8837854 | 0.541944 | 7.91E-197 | Loss | Gain |
| Chr5_CNVR_192 | Chr5 | 120455132 | 120463822 | 8691  | -0.922859  | 0.527463 | 1.49E-192 | Loss | Gain |
| Chr5_CNVR_193 | Chr5 | 120499452 | 120508140 | 8689  | -0.9441043 | 0.519752 | 6.05E-200 | Loss | Gain |
| Chr5_CNVR_194 | Chr5 | 120520308 | 120528996 | 8689  | -0.8455223 | 0.556509 | 3.29E-166 | Loss | Gain |
| Chr5_CNVR_195 | Chr5 | 120655872 | 120665430 | 9559  | -0.8445212 | 0.556896 | 2.95E-182 | Loss | Gain |
| Chr5_CNVR_196 | Chr5 | 120737558 | 120746246 | 8689  | -0.9338821 | 0.523448 | 2.22E-196 | Loss | Gain |
| Chr5_CNVR_197 | Chr5 | 120747116 | 120774054 | 26939 | -0.9994171 | 0.500202 | 0         | Loss | Gain |
| Chr5_CNVR_198 | Chr5 | 120779270 | 120787958 | 8689  | -0.9801383 | 0.506931 | 1.29E-212 | Loss | Gain |
| Chr5_CNVR_199 | Chr5 | 120791436 | 120815766 | 24331 | -0.9367925 | 0.522393 | 0         | Loss | Gain |
| Chr5_CNVR_200 | Chr5 | 120821850 | 120861824 | 39975 | -0.9986293 | 0.500475 | 0         | Loss | Gain |
| Chr5_CNVR_201 | Chr5 | 120862694 | 120877466 | 14773 | -0.9025262 | 0.534949 | 0         | Loss | Gain |
| Chr5_CNVR_202 | Chr5 | 120888764 | 120913094 | 24331 | -0.9530911 | 0.516525 | 0         | Loss | Gain |
| Chr5_CNVR_203 | Chr5 | 120917440 | 120926130 | 8691  | -0.9384813 | 0.521782 | 5.55E-198 | Loss | Gain |
| Chr5_CNVR_204 | Chr5 | 120927000 | 120950462 | 23463 | -0.9902443 | 0.503393 | 0         | Loss | Gain |
| Chr5_CNVR_205 | Chr5 | 120953938 | 120973056 | 19119 | -1.122006  | 0.459455 | 0         | Loss | Gain |
| Chr5_CNVR_206 | Chr5 | 120985222 | 120999126 | 13905 | -0.9537553 | 0.516287 | 0         | Loss | Gain |
| Chr5_CNVR_207 | Chr5 | 121006078 | 121015636 | 9559  | -0.9250865 | 0.526649 | 1.90E-212 | Loss | Gain |
| Chr7_CNVR_19  | Chr7 | 2637705   | 2647881   | 10177 | -0.8848338 | 0.54155  | 1.32E-214 | Loss | Gain |
| Chr7_CNVR_20  | Chr7 | 3699401   | 3708729   | 9329  | -0.9281157 | 0.525544 | 3.23E-213 | Loss | Gain |
| Chr7_CNVR_21  | Chr7 | 3709577   | 3719753   | 10177 | -0.9969008 | 0.501075 | 2.62E-261 | Loss | Gain |
| Chr7_CNVR_22  | Chr7 | 3730777   | 3739257   | 8481  | -0.9037846 | 0.534483 | 1.20E-185 | Loss | Gain |
| Chr7_CNVR_23  | Chr7 | 3979241   | 3987721   | 8481  | -0.8655561 | 0.548835 | 1.14E-172 | Loss | Gain |
| Chr7_CNVR_24  | Chr7 | 4211593   | 4221769   | 10177 | -0.9114485 | 0.531651 | 1.63E-225 | Loss | Gain |
| Chr7_CNVR_25  | Chr7 | 4237033   | 4248905   | 11873 | -0.8605449 | 0.550745 | 1.53E-238 | Loss | Gain |
| Chr7_CNVR_26  | Chr7 | 4268409   | 4286217   | 17809 | -0.8545302 | 0.553045 | 0         | Loss | Gain |
| Chr7_CNVR_27  | Chr7 | 4397305   | 4410025   | 12721 | -0.9512502 | 0.517184 | 5.00E-302 | Loss | Gain |

|              |      |          |          |       |            |          |           |      |      |
|--------------|------|----------|----------|-------|------------|----------|-----------|------|------|
| Chr7_CNVR_28 | Chr7 | 4420201  | 4429529  | 9329  | -0.8866289 | 0.540876 | 1.44E-197 | Loss | Gain |
| Chr7_CNVR_29 | Chr7 | 4439705  | 4448185  | 8481  | -0.9164573 | 0.529808 | 5.32E-190 | Loss | Gain |
| Chr7_CNVR_30 | Chr7 | 4450729  | 4472777  | 22049 | -0.8539823 | 0.553255 | 0         | Loss | Gain |
| Chr7_CNVR_31 | Chr7 | 4538073  | 4548249  | 10177 | -0.895148  | 0.537692 | 8.10E-219 | Loss | Gain |
| Chr7_CNVR_32 | Chr7 | 4583865  | 4592345  | 8481  | -0.7758083 | 0.584061 | 3.32E-143 | Loss | Gain |
| Chr7_CNVR_33 | Chr7 | 4606761  | 4618633  | 11873 | -0.850156  | 0.554725 | 1.13E-233 | Loss | Gain |
| Chr7_CNVR_34 | Chr7 | 4619481  | 4628809  | 9329  | -0.9860972 | 0.504842 | 1.65E-235 | Loss | Gain |
| Chr7_CNVR_35 | Chr7 | 4630505  | 4655097  | 24593 | -0.9783485 | 0.50756  | 0         | Loss | Gain |
| Chr7_CNVR_36 | Chr7 | 4685625  | 4698345  | 12721 | -0.9267733 | 0.526034 | 2.80E-289 | Loss | Gain |
| Chr7_CNVR_37 | Chr7 | 4980729  | 4989209  | 8481  | -0.8442704 | 0.556992 | 1.52E-165 | Loss | Gain |
| Chr7_CNVR_38 | Chr7 | 4992601  | 5001929  | 9329  | -0.9020381 | 0.53513  | 2.39E-203 | Loss | Gain |
| Chr7_CNVR_39 | Chr7 | 5006169  | 5016345  | 10177 | -0.8309648 | 0.562153 | 6.03E-193 | Loss | Gain |
| Chr7_CNVR_40 | Chr7 | 5019737  | 5029065  | 9329  | -0.9751324 | 0.508693 | 2.92E-231 | Loss | Gain |
| Chr7_CNVR_41 | Chr7 | 5096057  | 5109625  | 13569 | -0.8538912 | 0.55329  | 9.51E-269 | Loss | Gain |
| Chr7_CNVR_42 | Chr7 | 5289401  | 5304665  | 15265 | -0.9287181 | 0.525325 | 0         | Loss | Gain |
| Chr7_CNVR_43 | Chr7 | 5716793  | 5728665  | 11873 | -0.9414651 | 0.520704 | 2.88E-277 | Loss | Gain |
| Chr7_CNVR_44 | Chr7 | 5741385  | 5762585  | 21201 | -0.8682119 | 0.547825 | 0         | Loss | Gain |
| Chr7_CNVR_45 | Chr7 | 5783785  | 5795657  | 11873 | -0.8870273 | 0.540727 | 4.61E-251 | Loss | Gain |
| Chr7_CNVR_46 | Chr7 | 5813465  | 5824489  | 11025 | -0.867088  | 0.548252 | 1.63E-224 | Loss | Gain |
| Chr7_CNVR_47 | Chr7 | 5899961  | 5909289  | 9329  | -0.8589527 | 0.551353 | 2.74E-187 | Loss | Gain |
| Chr7_CNVR_48 | Chr7 | 6568185  | 6580905  | 12721 | -0.9096322 | 0.532321 | 2.01E-280 | Loss | Gain |
| Chr7_CNVR_49 | Chr7 | 8891705  | 8904425  | 12721 | -0.9011943 | 0.535443 | 4.36E-276 | Loss | Gain |
| Chr7_CNVR_50 | Chr7 | 8911209  | 8922233  | 11025 | -0.8609741 | 0.550581 | 7.66E-222 | Loss | Gain |
| Chr7_CNVR_1  | Chr7 | 11813065 | 11823241 | 10177 | 1.109804   | 2.15816  | 0         | Gain | Loss |
| Chr7_CNVR_2  | Chr7 | 11924153 | 11934329 | 10177 | 0.9536195  | 1.93673  | 1.37E-264 | Gain | Loss |
| Chr7_CNVR_3  | Chr7 | 11956377 | 11966553 | 10177 | 0.9904091  | 1.98675  | 3.55E-282 | Gain | Loss |
| Chr7_CNVR_4  | Chr7 | 12005561 | 12023369 | 17809 | 1.06448    | 2.09142  | 0         | Gain | Loss |
| Chr7_CNVR_51 | Chr7 | 12427865 | 12436345 | 8481  | -0.7978547 | 0.575204 | 2.68E-150 | Loss | Gain |
| Chr7_CNVR_52 | Chr7 | 12443977 | 12452457 | 8481  | -0.8373087 | 0.559687 | 3.12E-163 | Loss | Gain |
| Chr7_CNVR_53 | Chr7 | 12595769 | 12610185 | 14417 | -0.8608794 | 0.550617 | 2.17E-289 | Loss | Gain |
| Chr7_CNVR_54 | Chr7 | 12741625 | 12750953 | 9329  | -0.805075  | 0.572332 | 1.06E-167 | Loss | Gain |
| Chr7_CNVR_55 | Chr7 | 12835753 | 12845929 | 10177 | -0.8570515 | 0.55208  | 2.32E-203 | Loss | Gain |
| Chr7_CNVR_56 | Chr7 | 12914617 | 12926489 | 11873 | -0.8964139 | 0.53722  | 1.54E-255 | Loss | Gain |
| Chr7_CNVR_57 | Chr7 | 12945145 | 12953625 | 8481  | -0.8062063 | 0.571884 | 5.20E-153 | Loss | Gain |
| Chr7_CNVR_58 | Chr7 | 12970585 | 12985849 | 15265 | -0.8729692 | 0.546022 | 0         | Loss | Gain |
| Chr7_CNVR_59 | Chr7 | 13524329 | 13533657 | 9329  | -0.8017285 | 0.573661 | 1.66E-166 | Loss | Gain |
| Chr7_CNVR_60 | Chr7 | 13542985 | 13552313 | 9329  | -0.8834791 | 0.542059 | 2.17E-196 | Loss | Gain |
| Chr7_CNVR_61 | Chr7 | 13572665 | 13587929 | 15265 | -0.9289857 | 0.525227 | 0         | Loss | Gain |
| Chr7_CNVR_62 | Chr7 | 13598105 | 13606585 | 8481  | -1.0724    | 0.475527 | 4.28E-245 | Loss | Gain |
| Chr7_CNVR_63 | Chr7 | 13614217 | 13640505 | 26289 | -0.9732038 | 0.509374 | 0         | Loss | Gain |
| Chr7_CNVR_64 | Chr7 | 13650681 | 13659161 | 8481  | -0.967335  | 0.51145  | 1.09E-207 | Loss | Gain |
| Chr7_CNVR_65 | Chr7 | 13667641 | 13676969 | 9329  | -0.9621955 | 0.513275 | 2.88E-226 | Loss | Gain |
| Chr7_CNVR_66 | Chr7 | 13827065 | 13837241 | 10177 | -0.8414184 | 0.558095 | 4.21E-197 | Loss | Gain |
| Chr7_CNVR_67 | Chr7 | 13845721 | 13854201 | 8481  | -0.9060797 | 0.533633 | 1.96E-186 | Loss | Gain |
| Chr7_CNVR_68 | Chr7 | 14577545 | 14589417 | 11873 | -1.363039  | 0.388763 | 0         | Loss | Gain |
| Chr7_CNVR_5  | Chr7 | 15391625 | 15400953 | 9329  | 2.481663   | 5.58541  | 0         | Gain | Loss |
| Chr7_CNVR_69 | Chr7 | 15707929 | 15721497 | 13569 | -1.658069  | 0.316863 | 0         | Loss | Gain |
| Chr7_CNVR_70 | Chr7 | 15793577 | 15805449 | 11873 | -0.836604  | 0.55996  | 2.29E-227 | Loss | Gain |
| Chr7_CNVR_71 | Chr7 | 15858873 | 15867353 | 8481  | -0.7726593 | 0.585338 | 3.35E-142 | Loss | Gain |
| Chr7_CNVR_72 | Chr7 | 16056457 | 16075961 | 19505 | -0.8816124 | 0.54276  | 0         | Loss | Gain |
| Chr7_CNVR_73 | Chr7 | 16170937 | 16181113 | 10177 | -0.7909297 | 0.577972 | 2.91E-177 | Loss | Gain |
| Chr7_CNVR_74 | Chr7 | 16182809 | 16192985 | 10177 | -0.86688   | 0.548331 | 2.54E-207 | Loss | Gain |
| Chr7_CNVR_75 | Chr7 | 16547449 | 16560169 | 12721 | -0.8893788 | 0.539847 | 4.83E-270 | Loss | Gain |
| Chr7_CNVR_76 | Chr7 | 17620169 | 17629497 | 9329  | -0.8668309 | 0.54835  | 3.36E-190 | Loss | Gain |
| Chr7_CNVR_77 | Chr7 | 17685465 | 17694793 | 9329  | -0.8393934 | 0.558879 | 4.13E-180 | Loss | Gain |
| Chr7_CNVR_78 | Chr7 | 17866089 | 17877113 | 11025 | -0.9788533 | 0.507383 | 1.27E-274 | Loss | Gain |

|               |      |          |          |       |            |          |           |      |      |
|---------------|------|----------|----------|-------|------------|----------|-----------|------|------|
| Chr7_CNVR_79  | Chr7 | 17877961 | 17891529 | 13569 | -0.9744012 | 0.508951 | 0         | Loss | Gain |
| Chr7_CNVR_80  | Chr7 | 17894073 | 17905945 | 11873 | -1.109583  | 0.463428 | 0         | Loss | Gain |
| Chr7_CNVR_81  | Chr7 | 17947497 | 17955977 | 8481  | -0.8507821 | 0.554484 | 1.03E-167 | Loss | Gain |
| Chr7_CNVR_82  | Chr7 | 18376585 | 18399481 | 22897 | -0.9025287 | 0.534948 | 0         | Loss | Gain |
| Chr7_CNVR_6   | Chr7 | 18525833 | 18544489 | 18657 | 3.713679   | 13.1198  | 0         | Gain | Loss |
| Chr7_CNVR_7   | Chr7 | 18547033 | 18569081 | 22049 | 3.612927   | 12.2349  | 0         | Gain | Loss |
| Chr7_CNVR_8   | Chr7 | 18624201 | 18635225 | 11025 | 2.667259   | 6.35221  | 0         | Gain | Loss |
| Chr7_CNVR_83  | Chr7 | 19661305 | 19674025 | 12721 | -0.9059695 | 0.533674 | 1.54E-278 | Loss | Gain |
| Chr7_CNVR_84  | Chr7 | 19674873 | 19694377 | 19505 | -0.8479106 | 0.555589 | 0         | Loss | Gain |
| Chr7_CNVR_85  | Chr7 | 19713881 | 19725753 | 11873 | -0.9153811 | 0.530204 | 1.23E-264 | Loss | Gain |
| Chr7_CNVR_86  | Chr7 | 19738473 | 19752041 | 13569 | -0.8514    | 0.554247 | 2.04E-267 | Loss | Gain |
| Chr7_CNVR_87  | Chr7 | 19759673 | 19776633 | 16961 | -0.8947406 | 0.537844 | 0         | Loss | Gain |
| Chr7_CNVR_88  | Chr7 | 19777481 | 19785961 | 8481  | -0.9492316 | 0.517908 | 2.34E-201 | Loss | Gain |
| Chr7_CNVR_89  | Chr7 | 19964889 | 19975065 | 10177 | -0.7884176 | 0.578979 | 2.72E-176 | Loss | Gain |
| Chr7_CNVR_90  | Chr7 | 20168409 | 20179433 | 11025 | -0.9187464 | 0.528968 | 2.15E-247 | Loss | Gain |
| Chr7_CNVR_91  | Chr7 | 20188761 | 20197241 | 8481  | -0.9951103 | 0.501698 | 1.78E-217 | Loss | Gain |
| Chr7_CNVR_92  | Chr7 | 20324441 | 20334617 | 10177 | -0.9331746 | 0.523705 | 1.64E-234 | Loss | Gain |
| Chr7_CNVR_93  | Chr7 | 20336313 | 20344793 | 8481  | -0.8528688 | 0.553683 | 2.06E-168 | Loss | Gain |
| Chr7_CNVR_94  | Chr7 | 20349881 | 20371081 | 21201 | -0.8890683 | 0.539963 | 0         | Loss | Gain |
| Chr7_CNVR_95  | Chr7 | 20437225 | 20445705 | 8481  | -0.8579091 | 0.551752 | 4.23E-170 | Loss | Gain |
| Chr7_CNVR_96  | Chr7 | 20651769 | 20661945 | 10177 | -0.9276451 | 0.525716 | 3.26E-232 | Loss | Gain |
| Chr7_CNVR_97  | Chr7 | 20814585 | 20823065 | 8481  | -0.9010024 | 0.535515 | 1.07E-184 | Loss | Gain |
| Chr7_CNVR_98  | Chr7 | 20829849 | 20838329 | 8481  | -0.9600384 | 0.514043 | 3.92E-205 | Loss | Gain |
| Chr7_CNVR_99  | Chr7 | 20889209 | 20901081 | 11873 | -0.8397523 | 0.558739 | 7.92E-229 | Loss | Gain |
| Chr7_CNVR_100 | Chr7 | 21007929 | 21018953 | 11025 | -0.9356622 | 0.522802 | 5.37E-255 | Loss | Gain |
| Chr7_CNVR_101 | Chr7 | 21023193 | 21035913 | 12721 | -0.7839547 | 0.580773 | 1.08E-217 | Loss | Gain |
| Chr7_CNVR_102 | Chr7 | 21151241 | 21160569 | 9329  | -0.8598513 | 0.551009 | 1.28E-187 | Loss | Gain |
| Chr7_CNVR_103 | Chr7 | 21187705 | 21196185 | 8481  | -0.8729954 | 0.546012 | 3.55E-175 | Loss | Gain |
| Chr7_CNVR_104 | Chr7 | 21268265 | 21276745 | 8481  | -0.898094  | 0.536595 | 1.06E-183 | Loss | Gain |
| Chr7_CNVR_105 | Chr7 | 21278441 | 21286921 | 8481  | -0.9454428 | 0.51927  | 4.88E-200 | Loss | Gain |
| Chr7_CNVR_106 | Chr7 | 21396313 | 21404793 | 8481  | -0.8154454 | 0.568233 | 5.00E-156 | Loss | Gain |
| Chr7_CNVR_107 | Chr7 | 21432777 | 21442105 | 9329  | -0.9937027 | 0.502187 | 1.82E-238 | Loss | Gain |
| Chr7_CNVR_108 | Chr7 | 21470937 | 21479417 | 8481  | -0.834437  | 0.560802 | 2.79E-162 | Loss | Gain |
| Chr7_CNVR_109 | Chr7 | 21520121 | 21541321 | 21201 | -0.9452347 | 0.519345 | 0         | Loss | Gain |
| Chr7_CNVR_110 | Chr7 | 21576089 | 21584569 | 8481  | -1.262632  | 0.416783 | 0         | Loss | Gain |
| Chr7_CNVR_111 | Chr7 | 21589657 | 21603225 | 13569 | -0.9847453 | 0.505315 | 0         | Loss | Gain |
| Chr7_CNVR_112 | Chr7 | 21608313 | 21624425 | 16113 | -0.9253225 | 0.526563 | 0         | Loss | Gain |
| Chr7_CNVR_113 | Chr7 | 21649017 | 21665977 | 16961 | -0.9409191 | 0.520901 | 0         | Loss | Gain |
| Chr7_CNVR_114 | Chr7 | 21678697 | 21689721 | 11025 | -0.7978434 | 0.575208 | 9.12E-195 | Loss | Gain |
| Chr7_CNVR_115 | Chr7 | 21737209 | 21746537 | 9329  | -0.919754  | 0.528599 | 4.84E-210 | Loss | Gain |
| Chr7_CNVR_116 | Chr7 | 21888153 | 21898329 | 10177 | -0.8629877 | 0.549813 | 9.46E-206 | Loss | Gain |
| Chr7_CNVR_117 | Chr7 | 21907657 | 21916137 | 8481  | -0.8377627 | 0.559511 | 2.21E-163 | Loss | Gain |
| Chr7_CNVR_118 | Chr7 | 21943273 | 21958537 | 15265 | -0.8805926 | 0.543144 | 0         | Loss | Gain |
| Chr7_CNVR_119 | Chr7 | 21989913 | 22000089 | 10177 | -0.8442757 | 0.55699  | 3.05E-198 | Loss | Gain |
| Chr7_CNVR_120 | Chr7 | 22006873 | 22015353 | 8481  | -0.8496017 | 0.554938 | 2.54E-167 | Loss | Gain |
| Chr7_CNVR_121 | Chr7 | 22190041 | 22201913 | 11873 | -0.8630595 | 0.549785 | 1.01E-239 | Loss | Gain |
| Chr7_CNVR_122 | Chr7 | 22398649 | 22407129 | 8481  | -0.8904902 | 0.539431 | 4.15E-181 | Loss | Gain |
| Chr7_CNVR_123 | Chr7 | 22430873 | 22441049 | 10177 | -0.8821333 | 0.542565 | 1.66E-213 | Loss | Gain |
| Chr7_CNVR_124 | Chr7 | 22515673 | 22524153 | 8481  | -0.8503328 | 0.554657 | 1.45E-167 | Loss | Gain |
| Chr7_CNVR_125 | Chr7 | 22649657 | 22662377 | 12721 | -0.8550088 | 0.552862 | 1.20E-252 | Loss | Gain |
| Chr7_CNVR_126 | Chr7 | 22673401 | 22684425 | 11025 | -0.9354394 | 0.522883 | 6.76E-255 | Loss | Gain |
| Chr7_CNVR_127 | Chr7 | 22689513 | 22697993 | 8481  | -0.8448039 | 0.556786 | 1.01E-165 | Loss | Gain |
| Chr7_CNVR_128 | Chr7 | 22701385 | 22713257 | 11873 | -0.825188  | 0.564409 | 4.35E-222 | Loss | Gain |
| Chr7_CNVR_129 | Chr7 | 22750569 | 22760745 | 10177 | -0.9282699 | 0.525488 | 1.79E-232 | Loss | Gain |
| Chr7_CNVR_130 | Chr7 | 23829225 | 23837705 | 8481  | -0.8593308 | 0.551208 | 1.41E-170 | Loss | Gain |
| Chr7_CNVR_9   | Chr7 | 27005833 | 27014313 | 8481  | 0.9125426  | 1.88236  | 9.23E-205 | Gain | Loss |



|               |      |          |          |       |            |           |           |      |      |
|---------------|------|----------|----------|-------|------------|-----------|-----------|------|------|
| Chr7_CNVR_131 | Chr7 | 28899417 | 28912985 | 13569 | -0.9006355 | 0.535651  | 4.82E-294 | Loss | Gain |
| Chr7_CNVR_10  | Chr7 | 31292473 | 31308585 | 16113 | 3.300652   | 9.85361   | 0         | Gain | Loss |
| Chr7_CNVR_11  | Chr7 | 34943961 | 34952441 | 8481  | 0.9133394  | 1.8834    | 4.53E-205 | Gain | Loss |
| Chr7_CNVR_132 | Chr7 | 39648665 | 39660537 | 11873 | -0.8189086 | 0.566871  | 3.37E-219 | Loss | Gain |
| Chr7_CNVR_12  | Chr7 | 41842441 | 41850921 | 8481  | 3.79149    | 13.8469   | 0         | Gain | Loss |
| Chr7_CNVR_133 | Chr7 | 42482681 | 42497945 | 15265 | -3.912015  | 0.0664303 | 0         | Loss | Gain |
| Chr7_CNVR_13  | Chr7 | 42738777 | 42794745 | 55969 | 1.356263   | 2.56021   | 0         | Gain | Loss |
| Chr7_CNVR_134 | Chr7 | 43490953 | 43501129 | 10177 | -4.333777  | 0.049591  | 0         | Loss | Gain |
| Chr7_CNVR_14  | Chr7 | 44003145 | 44020105 | 16961 | 3.393465   | 10.5084   | 0         | Gain | Loss |
| Chr7_CNVR_15  | Chr7 | 44434777 | 44450041 | 15265 | 3.110389   | 8.63615   | 0         | Gain | Loss |
| Chr7_CNVR_135 | Chr7 | 44723945 | 44736665 | 12721 | -0.9415839 | 0.520661  | 5.59E-297 | Loss | Gain |
| Chr7_CNVR_136 | Chr7 | 44790089 | 44810441 | 20353 | -0.906984  | 0.533299  | 0         | Loss | Gain |
| Chr7_CNVR_137 | Chr7 | 44817225 | 44828249 | 11025 | -0.9527852 | 0.516634  | 9.65E-263 | Loss | Gain |
| Chr7_CNVR_138 | Chr7 | 44836729 | 44854537 | 17809 | -0.9504073 | 0.517486  | 0         | Loss | Gain |
| Chr7_CNVR_139 | Chr7 | 44855385 | 44879129 | 23745 | -0.9365015 | 0.522498  | 0         | Loss | Gain |
| Chr7_CNVR_140 | Chr7 | 44879977 | 44901177 | 21201 | -0.9821765 | 0.506215  | 0         | Loss | Gain |
| Chr7_CNVR_141 | Chr7 | 44913897 | 44927465 | 13569 | -0.895148  | 0.537692  | 4.80E-291 | Loss | Gain |
| Chr7_CNVR_142 | Chr7 | 44944425 | 44952905 | 8481  | -0.9055869 | 0.533815  | 2.89E-186 | Loss | Gain |
| Chr7_CNVR_143 | Chr7 | 44991913 | 45002937 | 11025 | -0.7893767 | 0.578594  | 3.27E-191 | Loss | Gain |
| Chr7_CNVR_144 | Chr7 | 45010569 | 45028377 | 17809 | -1.008656  | 0.497009  | 0         | Loss | Gain |
| Chr7_CNVR_145 | Chr7 | 45031769 | 45040249 | 8481  | -0.9524929 | 0.516739  | 1.70E-202 | Loss | Gain |
| Chr7_CNVR_146 | Chr7 | 45041097 | 45069929 | 28833 | -0.9195513 | 0.528673  | 0         | Loss | Gain |
| Chr7_CNVR_147 | Chr7 | 45083497 | 45100457 | 16961 | -1.013476  | 0.495351  | 0         | Loss | Gain |
| Chr7_CNVR_148 | Chr7 | 45102153 | 45113177 | 11025 | -0.9403106 | 0.521121  | 4.28E-257 | Loss | Gain |
| Chr7_CNVR_149 | Chr7 | 45116569 | 45130137 | 13569 | -0.8989914 | 0.536262  | 3.82E-293 | Loss | Gain |
| Chr7_CNVR_150 | Chr7 | 45139465 | 45148793 | 9329  | -0.9329464 | 0.523788  | 4.67E-215 | Loss | Gain |
| Chr7_CNVR_151 | Chr7 | 45149641 | 45163209 | 13569 | -0.9430152 | 0.520145  | 0         | Loss | Gain |
| Chr7_CNVR_152 | Chr7 | 45164057 | 45181017 | 16961 | -0.9538648 | 0.516248  | 0         | Loss | Gain |
| Chr7_CNVR_153 | Chr7 | 45189497 | 45208153 | 18657 | -1.012847  | 0.495567  | 0         | Loss | Gain |
| Chr7_CNVR_154 | Chr7 | 45209849 | 45218329 | 8481  | -0.8601952 | 0.550878  | 7.24E-171 | Loss | Gain |
| Chr7_CNVR_155 | Chr7 | 45225961 | 45242073 | 16113 | -0.9654296 | 0.512126  | 0         | Loss | Gain |
| Chr7_CNVR_156 | Chr7 | 45242921 | 45259033 | 16113 | -0.8796704 | 0.543492  | 0         | Loss | Gain |
| Chr7_CNVR_157 | Chr7 | 45269209 | 45280233 | 11025 | -0.9172623 | 0.529513  | 9.92E-247 | Loss | Gain |
| Chr7_CNVR_158 | Chr7 | 45293801 | 45307369 | 13569 | -0.893772  | 0.538205  | 2.70E-290 | Loss | Gain |
| Chr7_CNVR_159 | Chr7 | 45308217 | 45318393 | 10177 | -1.137652  | 0.454499  | 0         | Loss | Gain |
| Chr7_CNVR_160 | Chr7 | 45328569 | 45349769 | 21201 | -0.9777315 | 0.507778  | 0         | Loss | Gain |
| Chr7_CNVR_161 | Chr7 | 45366729 | 45376057 | 9329  | -0.8478615 | 0.555608  | 3.29E-183 | Loss | Gain |
| Chr7_CNVR_162 | Chr7 | 45424393 | 45440505 | 16113 | -0.9332416 | 0.52368   | 0         | Loss | Gain |
| Chr7_CNVR_163 | Chr7 | 45443897 | 45464249 | 20353 | -0.8633738 | 0.549666  | 0         | Loss | Gain |
| Chr7_CNVR_164 | Chr7 | 45465945 | 45483753 | 17809 | -0.9264571 | 0.526149  | 0         | Loss | Gain |
| Chr7_CNVR_165 | Chr7 | 45568553 | 45579577 | 11025 | -0.9315236 | 0.524304  | 3.93E-253 | Loss | Gain |
| Chr7_CNVR_166 | Chr7 | 45592297 | 45600777 | 8481  | -0.9311265 | 0.524449  | 4.57E-195 | Loss | Gain |
| Chr7_CNVR_167 | Chr7 | 45607561 | 45618585 | 11025 | -0.8976518 | 0.53676   | 5.48E-238 | Loss | Gain |
| Chr7_CNVR_168 | Chr7 | 45661833 | 45671161 | 9329  | -0.9234455 | 0.527248  | 1.92E-211 | Loss | Gain |
| Chr7_CNVR_169 | Chr7 | 45699993 | 45708473 | 8481  | -0.8392388 | 0.558938  | 7.15E-164 | Loss | Gain |
| Chr7_CNVR_170 | Chr7 | 45769529 | 45791577 | 22049 | -0.995998  | 0.501389  | 0         | Loss | Gain |
| Chr7_CNVR_171 | Chr7 | 45800057 | 45818713 | 18657 | -0.9897615 | 0.503561  | 0         | Loss | Gain |
| Chr7_CNVR_172 | Chr7 | 45848393 | 45857721 | 9329  | -0.9863973 | 0.504737  | 1.26E-235 | Loss | Gain |
| Chr7_CNVR_173 | Chr7 | 52530633 | 52541657 | 11025 | -0.8652689 | 0.548944  | 1.02E-223 | Loss | Gain |
| Chr7_CNVR_174 | Chr7 | 52561161 | 52570489 | 9329  | -0.9038578 | 0.534456  | 4.94E-204 | Loss | Gain |
| Chr7_CNVR_16  | Chr7 | 52606105 | 52654441 | 48337 | 2.651962   | 6.28521   | 0         | Gain | Loss |
| Chr7_CNVR_175 | Chr7 | 54598905 | 54608233 | 9329  | -0.7899993 | 0.578344  | 2.48E-162 | Loss | Gain |
| Chr7_CNVR_176 | Chr7 | 63468985 | 63477465 | 8481  | -0.8258047 | 0.564167  | 1.98E-159 | Loss | Gain |
| Chr7_CNVR_177 | Chr7 | 63524105 | 63532585 | 8481  | -0.8276982 | 0.563427  | 4.71E-160 | Loss | Gain |
| Chr7_CNVR_178 | Chr7 | 63533433 | 63545305 | 11873 | -0.8224392 | 0.565485  | 8.02E-221 | Loss | Gain |
| Chr7_CNVR_179 | Chr7 | 63547001 | 63557177 | 10177 | -0.8438291 | 0.557163  | 4.60E-198 | Loss | Gain |

|               |      |           |           |       |            |          |           |      |      |
|---------------|------|-----------|-----------|-------|------------|----------|-----------|------|------|
| Chr7_CNVR_180 | Chr7 | 63558873  | 63568201  | 9329  | -0.8744612 | 0.545458 | 4.96E-193 | Loss | Gain |
| Chr7_CNVR_181 | Chr7 | 63621625  | 63631801  | 10177 | -0.8892942 | 0.539878 | 2.00E-216 | Loss | Gain |
| Chr7_CNVR_182 | Chr7 | 63736953  | 63746281  | 9329  | -0.843745  | 0.557195 | 1.06E-181 | Loss | Gain |
| Chr7_CNVR_183 | Chr7 | 63972697  | 63981177  | 8481  | -0.79985   | 0.574409 | 6.05E-151 | Loss | Gain |
| Chr7_CNVR_184 | Chr7 | 70676137  | 70684617  | 8481  | -2.752578  | 0.148385 | 0         | Loss | Gain |
| Chr7_CNVR_17  | Chr7 | 89345705  | 89355033  | 9329  | 1.113673   | 2.16396  | 0         | Gain | Loss |
| Chr7_CNVR_18  | Chr7 | 89625545  | 89634025  | 8481  | 0.965839   | 1.9532   | 1.09E-225 | Gain | Loss |
| ChrX_CNVR_4   | ChrX | 37932775  | 37948747  | 15973 | -0.8446666 | 0.556839 | 2.22E-182 | Loss | Gain |
| ChrX_CNVR_5   | ChrX | 39207631  | 39229411  | 21781 | -0.9445155 | 0.519604 | 2.32E-299 | Loss | Gain |
| ChrX_CNVR_6   | ChrX | 39602575  | 39618547  | 15973 | -0.9553198 | 0.515727 | 2.79E-224 | Loss | Gain |
| ChrX_CNVR_7   | ChrX | 39635971  | 39654847  | 18877 | -1.00188   | 0.499349 | 3.69E-286 | Loss | Gain |
| ChrX_CNVR_8   | ChrX | 39660655  | 39704215  | 43561 | -1.003309  | 0.498855 | 0         | Loss | Gain |
| ChrX_CNVR_9   | ChrX | 39725995  | 39746323  | 20329 | -0.828949  | 0.562939 | 3.30E-224 | Loss | Gain |
| ChrX_CNVR_10  | ChrX | 39898783  | 39923467  | 24685 | -0.9851114 | 0.505187 | 0         | Loss | Gain |
| ChrX_CNVR_11  | ChrX | 40068667  | 40106419  | 37753 | -0.8956359 | 0.53751  | 0         | Loss | Gain |
| ChrX_CNVR_12  | ChrX | 40430215  | 40444735  | 14521 | -0.8986455 | 0.53639  | 2.47E-184 | Loss | Gain |
| ChrX_CNVR_1   | ChrX | 43006063  | 43104799  | 98737 | 4.457939   | 21.9773  | 0         | Gain | Loss |
| ChrX_CNVR_2   | ChrX | 44309959  | 44385463  | 75505 | 1.355785   | 2.55936  | 0         | Gain | Loss |
| ChrX_CNVR_13  | ChrX | 56760859  | 56776831  | 15973 | -1.006269  | 0.497832 | 3.41E-244 | Loss | Gain |
| ChrX_CNVR_3   | ChrX | 94758247  | 94801807  | 43561 | 2.240984   | 4.72719  | 0         | Gain | Loss |
| ChrX_CNVR_14  | ChrX | 95176423  | 95195299  | 18877 | -1.141328  | 0.453342 | 0         | Loss | Gain |
| ChrX_CNVR_15  | ChrX | 108813607 | 108828127 | 14521 | -0.8848823 | 0.541532 | 1.31E-179 | Loss | Gain |
| ChrX_CNVR_16  | ChrX | 109027051 | 109044475 | 17425 | -0.8485017 | 0.555361 | 2.58E-200 | Loss | Gain |
| ChrX_CNVR_17  | ChrX | 118639291 | 118678495 | 39205 | -2.882401  | 0.135616 | 0         | Loss | Gain |
| ChrX_CNVR_18  | ChrX | 118851283 | 118871611 | 20329 | -1.101298  | 0.466097 | 0         | Loss | Gain |
| ChrX_CNVR_19  | ChrX | 118925335 | 118958731 | 33397 | -1.255289  | 0.41891  | 0         | Loss | Gain |
| ChrX_CNVR_20  | ChrX | 118963087 | 119003743 | 40657 | -1.761754  | 0.294889 | 0         | Loss | Gain |
| ChrX_CNVR_21  | ChrX | 119352223 | 119368195 | 15973 | -2.423496  | 0.186404 | 0         | Loss | Gain |
| ChrX_CNVR_22  | ChrX | 119382715 | 119398687 | 15973 | -1.342959  | 0.394211 | 0         | Loss | Gain |
| ChrX_CNVR_23  | ChrX | 128131015 | 128161507 | 30493 | -0.8955695 | 0.537535 | 0         | Loss | Gain |
| ChrX_CNVR_24  | ChrX | 128215231 | 128239915 | 24685 | -1.351032  | 0.392012 | 0         | Loss | Gain |
| ChrX_CNVR_25  | ChrX | 140201491 | 140223271 | 21781 | -0.8342016 | 0.560893 | 1.08E-242 | Loss | Gain |
| ChrX_CNVR_26  | ChrX | 140224723 | 140243599 | 18877 | -0.854879  | 0.552912 | 1.27E-219 | Loss | Gain |
| ChrX_CNVR_27  | ChrX | 140275543 | 140291515 | 15973 | -0.8826487 | 0.542371 | 1.60E-196 | Loss | Gain |
| ChrX_CNVR_28  | ChrX | 144438427 | 144455851 | 17425 | -0.8080748 | 0.571144 | 3.29E-184 | Loss | Gain |
| ChrX_CNVR_29  | ChrX | 144646063 | 144660583 | 14521 | -0.8829477 | 0.542258 | 6.01E-179 | Loss | Gain |
| ChrX_CNVR_30  | ChrX | 148804591 | 148824919 | 20329 | -0.9403816 | 0.521095 | 1.61E-277 | Loss | Gain |
