# Supplementary material for: Whole-Genome Analyses of Korean Native and Holstein Cattle Breeds by Massively Parallel Sequencing
Source: PubMed Central journal article supplement (PMC4081042; doi:10.1371/journal.pone.0101127), 2014-07-03
Supplement: pone.0101127.s010.pdf [file pone.0101127.s010.pdf]

**Supplementary Table S7.** Gene Ontology terms enriched among the top 100 genes containing the highest number of nsSNPs in each of breed-specific nsSNPs. HAN, JJH, CHS, and HOL indicate Hanwoo, Jeju Heugu, Chikso, and Korean Holstein respectively.

| GO term    | Breed |     |     |     | Description                               | P-value  |          |          |          |
|------------|-------|-----|-----|-----|-------------------------------------------|----------|----------|----------|----------|
|            |       |     |     |     |                                           | P-HAN    | P-JJH    | P-CHS    | P-HOL    |
| GO:0032502 | HAN   | JJH | CHS | HOL | developmental process                     | 4.50E-53 | 4.20E-29 | 1.40E-19 | 3.20E-22 |
| GO:0032501 | HAN   | JJH | CHS | HOL | multicellular organismal process          | 9.50E-69 | 1.20E-48 | 6.70E-61 | 1.80E-59 |
| GO:0002376 | HAN   | JJH | CHS | HOL | immune system process                     | 3.00E-25 | 1.20E-14 | 4.00E-06 | 1.70E-14 |
| GO:0000003 | HAN   | JJH | CHS | HOL | reproduction                              | 8.70E-14 | 4.00E-09 | 5.20E-09 | 1.30E-10 |
| GO:0016043 | HAN   | JJH | CHS | HOL | cellular component organization           | 3.70E-13 | 9.60E-07 | 6.20E-08 | 1.30E-06 |
| GO:0048518 | HAN   | JJH | CHS | HOL | positive regulation of biological process | 1.50E-35 | 4.90E-15 | 5.20E-11 | 5.40E-17 |
| GO:0048519 | HAN   | JJH | CHS | HOL | negative regulation of biological process | 8.90E-26 | 3.80E-24 | 5.00E-11 | 1.60E-14 |
| GO:0022610 | HAN   | JJH | CHS | HOL | biological adhesion                       | 4.70E-08 | 2.40E-12 | 2.30E-06 | 2.10E-06 |
| GO:0022414 | HAN   | JJH | CHS | HOL | reproductive process                      | 8.70E-14 | 4.00E-09 | 5.20E-09 | 1.50E-07 |
| GO:0051179 | HAN   | JJH | CHS | HOL | localization                              | 9.70E-11 | 1.80E-05 | 7.80E-05 | 8.50E-06 |
| GO:0040011 | HAN   | JJH | CHS | HOL | locomotion                                | 2.00E-23 | 5.10E-09 | 4.70E-11 | 2.50E-13 |
| GO:0050896 | HAN   | JJH | CHS | HOL | response to stimulus                      | 5.90E-35 | 1.30E-32 | 5.60E-30 | 8.50E-39 |
| GO:0016265 | HAN   | JJH | -   | HOL | death                                     | 1.00E-06 | 2.10E-09 | -        | 4.80E-08 |
| GO:0051234 | HAN   | JJH | -   | HOL | establishment of localization             | 1.20E-08 | 0.00078  | -        | 0.001    |
| GO:0040007 | HAN   | -   | -   | HOL | growth                                    | 1.80E-22 | -        | -        | 4.60E-12 |
| GO:0050789 | HAN   | -   | -   | -   | regulation of biological process          | 1.30E-05 | -        | -        | -        |
| GO:0065007 | HAN   | -   | -   | -   | biological regulation                     | 7.40E-06 | -        | -        | -        |
| GO:0009987 | HAN   | -   | -   | -   | cellular process                          | 0.0074   | -        | -        | -        |
| GO:0008152 | HAN   | -   | -   | -   | metabolic process                         | 0.0011   | -        | -        | -        |
| GO:0044085 | HAN   | -   | -   | -   | cellular component biogenesis             | 0.006    | -        | -        | -        |
