# Supplementary material for: Whole-Genome Analyses of Korean Native and Holstein Cattle Breeds by Massively Parallel Sequencing
Source: PubMed Central journal article supplement (PMC4081042; doi:10.1371/journal.pone.0101127), 2014-07-03
Supplement: pone.0101127.s011.pdf [file pone.0101127.s011.pdf]

Supplementary Table S8. Gene Ontology terms enriched among the genic-CNVs from HANvsHOL.

| Go term                   | Ontology | Breed of Gain | Description                               | P-HAN    | P-HOL     |
|---------------------------|----------|---------------|-------------------------------------------|----------|-----------|
| <b>Biological Process</b> |          |               |                                           |          |           |
| GO:0032502                | P        | HAN/HOL       | developmental process                     | 1.10E-22 | 3.10E-191 |
| GO:0032501                | P        | HAN/HOL       | multicellular organismal process          | 3.60E-53 | 2.80E-259 |
| GO:0002376                | P        | HAN/HOL       | immune system process                     | 6.20E-21 | 6.30E-30  |
| GO:0016043                | P        | HAN/HOL       | cellular component organization           | 3.70E-08 | 1.80E-71  |
| GO:0065007                | P        | HAN/HOL       | biological regulation                     | 5.30E-03 | 8.50E-16  |
| GO:0016265                | P        | HAN/HOL       | death                                     | 2.30E-04 | 4.10E-42  |
| GO:0051234                | P        | HAN/HOL       | establishment of localization             | 1.10E-06 | 1.30E-21  |
| GO:0051179                | P        | HAN/HOL       | localization                              | 1.40E-07 | 6.10E-27  |
| GO:0040007                | P        | HAN/HOL       | growth                                    | 8.40E-06 | 9.80E-61  |
| GO:0050896                | P        | HAN/HOL       | response to stimulus                      | 9.80E-51 | 2.10E-79  |
| GO:0044085                | P        | HAN/HOL       | cellular component biogenesis             | 5.50E-04 | 3.90E-18  |
| GO:0000003                | P        | HAN           | reproduction                              | 6.70E-12 | -         |
| GO:0048518                | P        | HAN           | positive regulation of biological process | 1.60E-40 | -         |
| GO:0048519                | P        | HAN           | negative regulation of biological process | 6.80E-16 | -         |
| GO:0022414                | P        | HAN           | reproductive process                      | 9.00E-09 | -         |
| GO:0040011                | P        | HAN           | locomotion                                | 2.30E-15 | -         |
| GO:0050789                | P        | HOL           | regulation of biological process          | -        | 2.90E-13  |
| GO:0022610                | P        | HOL           | biological adhesion                       | -        | 3.10E-14  |
| GO:0009987                | P        | HOL           | cellular process                          | -        | 1.30E-06  |
| GO:0008152                | P        | HOL           | metabolic process                         | -        | 5.00E-08  |
| <b>Molecular Function</b> |          |               |                                           |          |           |
| GO:0060089                | F        | HAN/HOL       | molecular transducer activity             | 1.80E-05 | 6.40E-05  |
| GO:0005215                | F        | HOL           | transporter activity                      | -        | 2.50E-05  |
| GO:0030528                | F        | HOL           | transcription regulator activity          | -        | 3.10E-08  |
| GO:0003824                | F        | HOL           | catalytic activity                        | -        | 0.0009    |
| GO:0005488                | F        | HOL           | binding                                   | -        | 2.30E-10  |
| GO:0030234                | F        | HOL           | enzyme regulator activity                 | -        | 4.40E-06  |
| <b>Cellular Component</b> |          |               |                                           |          |           |
| GO:0032991                | C        | HAN/HOL       | macromolecular complex                    | 0.00061  | 2.10E-09  |
| GO:0005623                | C        | HAN/HOL       | cell                                      | 0.0014   | 2.00E-11  |
| GO:0044464                | C        | HAN/HOL       | cell part                                 | 1.40E-03 | 2.00E-11  |
| GO:0031974                | C        | HAN/HOL       | membrane-enclosed lumen                   | 1.20E-07 | 3.30E-47  |
| GO:0044421                | C        | HAN/HOL       | extracellular region part                 | 2.40E-12 | 6.70E-59  |
| GO:0005576                | C        | HAN/HOL       | extracellular region                      | 6.90E-09 | 1.50E-26  |
| GO:0045202                | C        | HAN/HOL       | synapse                                   | 8.80E-10 | 3.30E-08  |
| GO:0044456                | C        | HAN/HOL       | synapse part                              | 1.40E-08 | 3.10E-03  |
| GO:0043226                | C        | HAN/HOL       | organelle                                 | 2.60E-04 | 3.00E-39  |
| GO:0044422                | C        | HAN/HOL       | organelle part                            | 4.30E-04 | 8.90E-46  |
