# Supplementary material for: Whole-Genome Analyses of Korean Native and Holstein Cattle Breeds by Massively Parallel Sequencing
Source: PubMed Central journal article supplement (PMC4081042; doi:10.1371/journal.pone.0101127), 2014-07-03
Supplement: pone.0101127.s012.pdf [file pone.0101127.s012.pdf]

Supplementary Table S9. Gene Ontology terms enriched among the genic-CNVs from JJHvsHOL.

| Go term                   | Ontology | Breed of Gain | Description                               | P-JJB    | P-HOL    |
|---------------------------|----------|---------------|-------------------------------------------|----------|----------|
| <b>Biological Process</b> |          |               |                                           |          |          |
| GO:0032502                | P        | JJH/HOL       | developmental process                     | 7.10E-08 | 1.10E-06 |
| GO:0032501                | P        | JJH/HOL       | multicellular organismal process          | 3.10E-30 | 1.20E-15 |
| GO:0002376                | P        | JJH/HOL       | immune system process                     | 1.20E-18 | 4.20E-17 |
| GO:0016043                | P        | JJH/HOL       | cellular component organization           | 4.10E-03 | 3.00E-04 |
| GO:0048518                | P        | JJH/HOL       | positive regulation of biological process | 1.80E-23 | 3.00E-10 |
| GO:0048519                | P        | JJH/HOL       | negative regulation of biological process | 2.70E-07 | 2.00E-12 |
| GO:0051179                | P        | JJH/HOL       | localization                              | 1.10E-04 | 3.40E-03 |
| GO:0050896                | P        | JJH/HOL       | response to stimulus                      | 2.60E-31 | 4.10E-23 |
| GO:0065007                | P        | JJH           | biological regulation                     | 1.80E-03 | -        |
| GO:0016265                | P        | JJH           | death                                     | 1.80E-05 | -        |
| GO:0051234                | P        | JJH           | establishment of localization             | 9.20E-05 | -        |
| GO:0022610                | P        | HOL           | biological adhesion                       | -        | 0.00037  |
| <b>Molecular Function</b> |          |               |                                           |          |          |
| GO:0060089                | F        | JJB           | molecular transducer activity             | 9.90E-05 | -        |
| <b>Cellular Component</b> |          |               |                                           |          |          |
| GO:0005623                | C        | JJH/HOL       | cell                                      | 0.0018   | 3.10E-03 |
| GO:0044464                | C        | JJH/HOL       | cell part                                 | 0.0018   | 3.10E-03 |
| GO:0044421                | C        | JJH/HOL       | extracellular region part                 | 1.40E-09 | 2.40E-16 |
| GO:0005576                | C        | JJH/HOL       | extracellular region                      | 1.70E-06 | 3.00E-11 |
| GO:0031974                | C        | HOL           | membrane-enclosed lumen                   | -        | 1.30E-07 |
| GO:0043226                | C        | HOL           | organelle                                 | -        | 6.30E-03 |
| GO:0044422                | C        | HOL           | organelle part                            | -        | 5.50E-03 |
