# Supplementary material for: Whole-Genome Analyses of Korean Native and Holstein Cattle Breeds by Massively Parallel Sequencing
Source: PubMed Central journal article supplement (PMC4081042; doi:10.1371/journal.pone.0101127), 2014-07-03
Supplement: pone.0101127.s013.pdf [file pone.0101127.s013.pdf]

Supplementary Table S10. Gene Ontology terms enriched among the genic-CNVs from CHSvsHOL.

| Go term                   | Ontology | Breed of Gain | Description                               | P-CHS    | P-HOL     |
|---------------------------|----------|---------------|-------------------------------------------|----------|-----------|
| <b>Biological Process</b> |          |               |                                           |          |           |
| GO:0002376                | P        | CHS/HOL       | immune system process                     | 1.20E-15 | 6.60E-86  |
| GO:0016043                | P        | CHS/HOL       | cellular component organization           | 5.10E-11 | 2.10E-263 |
| GO:0065007                | P        | CHS/HOL       | biological regulation                     | 2.20E-03 | 1.00E-46  |
| GO:0051234                | P        | CHS/HOL       | establishment of localization             | 7.60E-07 | 3.90E-75  |
| GO:0051179                | P        | CHS/HOL       | localization                              | 9.10E-08 | 2.00E-104 |
| GO:0050896                | P        | CHS/HOL       | response to stimulus                      | 2.80E-43 | 8.90E-291 |
| GO:0044085                | P        | CHS/HOL       | cellular component biogenesis             | 2.90E-04 | 2.80E-56  |
| GO:0032502                | P        | CHS           | developmental process                     | 1.70E-27 | -         |
| GO:0032501                | P        | CHS           | multicellular organismal process          | 1.90E-51 | -         |
| GO:0000003                | P        | CHS           | reproduction                              | 1.90E-17 | -         |
| GO:0048518                | P        | CHS           | positive regulation of biological process | 1.70E-38 | -         |
| GO:0048519                | P        | CHS           | negative regulation of biological process | 5.20E-22 | -         |
| GO:0016265                | P        | CHS           | death                                     | 1.50E-04 | -         |
| GO:0022414                | P        | CHS           | reproductive process                      | 1.30E-10 | -         |
| GO:0040007                | P        | CHS           | growth                                    | 1.90E-10 | -         |
| GO:0040011                | P        | CHS           | locomotion                                | 2.50E-13 | -         |
| GO:0050789                | P        | HOL           | regulation of biological process          | -        | 1.50E-42  |
| GO:0022610                | P        | HOL           | biological adhesion                       | -        | 4.90E-31  |
| GO:0009987                | P        | HOL           | cellular process                          | -        | 1.30E-20  |
| GO:0008152                | P        | HOL           | metabolic process                         | -        | 1.00E-29  |
| <b>Molecular Function</b> |          |               |                                           |          |           |
| GO:0060089                | F        | CHS/HOL       | molecular transducer activity             | 0.00043  | 4.70E-04  |
| GO:0005215                | F        | HOL           | transporter activity                      | -        | 4.30E-09  |
| GO:0016209                | F        | HOL           | antioxidant activity                      | -        | 1.30E-03  |
| GO:0030528                | F        | HOL           | transcription regulator activity          | -        | 2.20E-15  |
| GO:0005198                | F        | HOL           | structural molecule activity              | -        | 2.30E-08  |
| GO:0003824                | F        | HOL           | catalytic activity                        | -        | 3.50E-10  |
| GO:0005488                | F        | HOL           | binding                                   | -        | 4.10E-29  |
| GO:0030234                | F        | HOL           | enzyme regulator activity                 | -        | 3.90E-19  |
| GO:0009055                | F        | HOL           | electron carrier activity                 | -        | 1.80E-04  |
| <b>Cellular Component</b> |          |               |                                           |          |           |
| GO:0032991                | C        | CHS/HOL       | macromolecular complex                    | 0.0002   | 3.70E-40  |
| GO:0005623                | C        | CHS/HOL       | cell                                      | 0.00042  | 6.80E-30  |
| GO:0044464                | C        | CHS/HOL       | cell part                                 | 4.20E-04 | 6.80E-30  |
| GO:0005576                | C        | CHS/HOL       | extracellular region                      | 1.00E-04 | 6.00E-76  |
| GO:0045202                | C        | CHS/HOL       | synapse                                   | 3.50E-06 | 1.80E-36  |
| GO:0043226                | C        | CHS/HOL       | organelle                                 | 6.40E-06 | 9.00E-119 |
| GO:0044422                | C        | CHS/HOL       | organelle part                            | 8.60E-08 | 5.40E-139 |
| GO:0031974                | C        | CHS           | membrane-enclosed lumen                   | 2.10E-15 | -         |
| GO:0044421                | C        | CHS           | extracellular region part                 | 5.50E-08 | -         |
| GO:0044456                | C        | HOL           | synapse part                              | -        | 5.90E-20  |
