# Supplementary material for: Whole-Genome Analyses of Korean Native and Holstein Cattle Breeds by Massively Parallel Sequencing
Source: PubMed Central journal article supplement (PMC4081042; doi:10.1371/journal.pone.0101127), 2014-07-03
Supplement: pone.0101127.s014.pdf [file pone.0101127.s014.pdf]

**Supplementary Table S11.** The nsSNPs identified in the pigmentation-related genes from total nsSNP sets from Hanwoo, Jeju Heugu, Chikso, and Korean Holstein. The TYR, TYRP1, DCT, and MC1R indicate tyrosinase, tyrosinase-related protein 1, dopachrome tautomerase, and melanocortin 1 receptor respectively.

| <b>Breed</b>           | <b>TYR</b>                           | <b>TYRP1</b>                         | <b>DCT</b>                            | <b>MC1R</b>                           |
|------------------------|--------------------------------------|--------------------------------------|---------------------------------------|---------------------------------------|
| <b>Hanwoo</b>          |                                      |                                      | Chr12:69507694<br>(T>C: Heterozygous) |                                       |
|                        |                                      | Chr8:31717680<br>(T>C: Heterozygous) | Chr12:69532190<br>(T>C: Heterozygous) |                                       |
|                        |                                      |                                      | Chr12:69534625<br>(A>G: Heterozygous) |                                       |
| <b>Jeju Heugu</b>      |                                      |                                      | Chr12:69534625<br>(A>G: Heterozygous) | Chr18:14758485<br>(G>A: Heterozygous) |
|                        |                                      |                                      | Chr12:69527675<br>(C>T: Heterozygous) |                                       |
| <b>Korean Holstein</b> |                                      |                                      | Chr12:69534625<br>(A>G: Heterozygous) | Chr18:14757910<br>(T>C: Homozygous)   |
|                        |                                      |                                      | Chr12:69544526<br>(A>G: Heterozygous) |                                       |
|                        |                                      |                                      |                                       |                                       |
| <b>Chikso</b>          | Chr29:6461851<br>(G>A: Heterozygous) | Chr8:31717680<br>(T>C: Heterozygous) | Chr12:69544299<br>(G>C: Heterozygous) |                                       |
