# Supplementary material for: Whole-Genome Analyses of Korean Native and Holstein Cattle Breeds by Massively Parallel Sequencing
Source: PubMed Central journal article supplement (PMC4081042; doi:10.1371/journal.pone.0101127), 2014-07-03
Supplement: pone.0101127.s015.pdf [file pone.0101127.s015.pdf]

**Supplementary Table S12.** Regions of homozygosity (ROHs) detected from Hanwoo, Jeju Heugu, Chikso, and Korean Holstein in this study.

***Hanwoo***

| <b>Region_Name</b> | <b>Chr</b> | <b>Bin_Start</b> | <b>Bin_End</b> | <b>Size</b> |
|--------------------|------------|------------------|----------------|-------------|
| HAN_ROH_1          | Chr1       | 52,800,001       | 53,200,000     | 400,000     |
| HAN_ROH_2          | Chr2       | 12,400,001       | 19,200,000     | 6,800,000   |
| HAN_ROH_3          | Chr2       | 19,600,001       | 32,000,000     | 12,400,000  |
| HAN_ROH_4          | Chr2       | 48,000,001       | 48,800,000     | 800,000     |
| HAN_ROH_5          | Chr2       | 62,000,001       | 62,400,000     | 400,000     |
| HAN_ROH_6          | Chr2       | 64,400,001       | 100,000,000    | 35,600,000  |
| HAN_ROH_7          | Chr2       | 106,000,001      | 109,200,000    | 3,200,000   |
| HAN_ROH_8          | Chr3       | 20,400,001       | 20,800,000     | 400,000     |
| HAN_ROH_9          | Chr5       | 21,600,001       | 28,400,000     | 6,800,000   |
| HAN_ROH_10         | Chr5       | 75,600,001       | 76,000,000     | 400,000     |
| HAN_ROH_11         | Chr5       | 92,400,001       | 92,800,000     | 400,000     |
| HAN_ROH_12         | Chr6       | 1                | 1,200,000      | 1,200,000   |
| HAN_ROH_13         | Chr6       | 16,800,001       | 18,800,000     | 2,000,000   |
| HAN_ROH_14         | Chr6       | 64,000,001       | 64,400,000     | 400,000     |
| HAN_ROH_15         | Chr6       | 116,800,001      | 117,200,000    | 400,000     |
| HAN_ROH_16         | Chr7       | 86,800,001       | 87,600,000     | 800,000     |
| HAN_ROH_17         | Chr8       | 103,600,001      | 104,400,000    | 800,000     |
| HAN_ROH_18         | Chr9       | 20,000,001       | 20,400,000     | 400,000     |
| HAN_ROH_19         | Chr9       | 63,600,001       | 64,800,000     | 1,200,000   |
| HAN_ROH_20         | Chr10      | 12,000,001       | 12,400,000     | 400,000     |
| HAN_ROH_21         | Chr10      | 35,600,001       | 36,400,000     | 800,000     |
| HAN_ROH_22         | Chr10      | 38,800,001       | 39,200,000     | 400,000     |
| HAN_ROH_23         | Chr10      | 49,600,001       | 50,400,000     | 800,000     |
| HAN_ROH_24         | Chr10      | 58,400,001       | 58,800,000     | 400,000     |
| HAN_ROH_25         | Chr10      | 71,600,001       | 72,400,000     | 800,000     |
| HAN_ROH_26         | Chr11      | 17,600,001       | 18,000,000     | 400,000     |
| HAN_ROH_27         | Chr11      | 61,200,001       | 62,000,000     | 800,000     |
| HAN_ROH_28         | Chr11      | 71,600,001       | 72,000,000     | 400,000     |
| HAN_ROH_29         | Chr12      | 400,001          | 2,800,000      | 2,400,000   |
| HAN_ROH_30         | Chr12      | 40,800,001       | 42,000,000     | 1,200,000   |
| HAN_ROH_31         | Chr12      | 44,000,001       | 44,800,000     | 800,000     |
| HAN_ROH_32         | Chr12      | 56,800,001       | 58,000,000     | 1,200,000   |
| HAN_ROH_33         | Chr13      | 38,400,001       | 53,600,000     | 15,200,000  |
| HAN_ROH_34         | Chr13      | 54,000,001       | 58,000,000     | 4,000,000   |
| HAN_ROH_35         | Chr14      | 46,800,001       | 48,000,000     | 1,200,000   |
| HAN_ROH_36         | Chr15      | 18,000,001       | 18,400,000     | 400,000     |
| HAN_ROH_37         | Chr15      | 35,600,001       | 36,000,000     | 400,000     |
| HAN_ROH_38         | Chr16      | 72,000,001       | 76,800,000     | 4,800,000   |
| HAN_ROH_39         | Chr17      | 6,000,001        | 6,800,000      | 800,000     |
| HAN_ROH_40         | Chr17      | 54,400,001       | 54,800,000     | 400,000     |
| HAN_ROH_41         | Chr19      | 1,600,001        | 2,000,000      | 400,000     |

|            |       |            |            |            |
|------------|-------|------------|------------|------------|
| HAN_ROH_42 | Chr19 | 2,800,001  | 3,200,000  | 400,000    |
| HAN_ROH_43 | Chr19 | 44,800,001 | 45,200,000 | 400,000    |
| HAN_ROH_44 | Chr20 | 47,200,001 | 47,600,000 | 400,000    |
| HAN_ROH_45 | Chr21 | 400,001    | 800,000    | 400,000    |
| HAN_ROH_46 | Chr21 | 2,000,001  | 10,400,000 | 8,400,000  |
| HAN_ROH_47 | Chr22 | 16,400,001 | 16,800,000 | 400,000    |
| HAN_ROH_48 | Chr22 | 60,800,001 | 61,200,000 | 400,000    |
| HAN_ROH_49 | Chr23 | 1          | 1,600,000  | 1,600,000  |
| HAN_ROH_50 | Chr24 | 28,800,001 | 29,200,000 | 400,000    |
| HAN_ROH_51 | Chr24 | 40,800,001 | 41,600,000 | 800,000    |
| HAN_ROH_52 | Chr24 | 46,400,001 | 56,800,000 | 10,400,000 |
| HAN_ROH_53 | Chr28 | 18,000,001 | 26,000,000 | 8,000,000  |

### *Jeju Heugu*

| <b>Region_Name</b> | <b>Chr</b> | <b>Bin_Start</b> | <b>Bin_End</b> | <b>Size</b> |
|--------------------|------------|------------------|----------------|-------------|
| JJH_ROH_1          | Chr1       | 54,800,001       | 55,200,000     | 400,000     |
| JJH_ROH_2          | Chr1       | 70,400,001       | 70,800,000     | 400,000     |
| JJH_ROH_3          | Chr1       | 102,800,001      | 103,600,000    | 800,000     |
| JJH_ROH_4          | Chr2       | 24,400,001       | 38,000,000     | 13,600,000  |
| JJH_ROH_5          | Chr2       | 48,000,001       | 48,400,000     | 400,000     |
| JJH_ROH_6          | Chr2       | 89,200,001       | 89,600,000     | 400,000     |
| JJH_ROH_7          | Chr2       | 91,200,001       | 92,000,000     | 800,000     |
| JJH_ROH_8          | Chr2       | 96,400,001       | 100,400,000    | 4,000,000   |
| JJH_ROH_9          | Chr2       | 111,600,001      | 112,000,000    | 400,000     |
| JJH_ROH_10         | Chr3       | 94,800,001       | 95,200,000     | 400,000     |
| JJH_ROH_11         | Chr3       | 102,800,001      | 109,200,000    | 6,400,000   |
| JJH_ROH_12         | Chr4       | 78,400,001       | 78,800,000     | 400,000     |
| JJH_ROH_13         | Chr4       | 95,600,001       | 96,000,000     | 400,000     |
| JJH_ROH_14         | Chr5       | 13,600,001       | 21,600,000     | 8,000,000   |
| JJH_ROH_15         | Chr5       | 70,000,001       | 70,800,000     | 800,000     |
| JJH_ROH_16         | Chr5       | 80,800,001       | 81,600,000     | 800,000     |
| JJH_ROH_17         | Chr5       | 94,800,001       | 99,200,000     | 4,400,000   |
| JJH_ROH_18         | Chr5       | 100,000,001      | 102,000,000    | 2,000,000   |
| JJH_ROH_19         | Chr5       | 103,600,001      | 114,000,000    | 10,400,000  |
| JJH_ROH_20         | Chr6       | 51,200,001       | 51,600,000     | 400,000     |
| JJH_ROH_21         | Chr7       | 47,200,001       | 48,000,000     | 800,000     |
| JJH_ROH_22         | Chr7       | 52,800,001       | 53,600,000     | 800,000     |
| JJH_ROH_23         | Chr7       | 66,000,001       | 66,400,000     | 400,000     |
| JJH_ROH_24         | Chr8       | 8,800,001        | 22,000,000     | 13,200,000  |
| JJH_ROH_25         | Chr8       | 23,600,001       | 37,200,000     | 13,600,000  |
| JJH_ROH_26         | Chr8       | 38,000,001       | 42,400,000     | 4,400,000   |
| JJH_ROH_27         | Chr8       | 92,400,001       | 94,400,000     | 2,000,000   |
| JJH_ROH_28         | Chr9       | 2,400,001        | 4,000,000      | 1,600,000   |
| JJH_ROH_29         | Chr9       | 10,400,001       | 19,200,000     | 8,800,000   |
| JJH_ROH_30         | Chr9       | 26,400,001       | 34,800,000     | 8,400,000   |
| JJH_ROH_31         | Chr9       | 35,200,001       | 42,000,000     | 6,800,000   |
| JJH_ROH_32         | Chr9       | 42,400,001       | 62,000,000     | 19,600,000  |
| JJH_ROH_33         | Chr9       | 77,600,001       | 78,000,000     | 400,000     |
| JJH_ROH_34         | Chr10      | 44,800,001       | 58,800,000     | 14,000,000  |
| JJH_ROH_35         | Chr11      | 14,000,001       | 46,800,000     | 32,800,000  |

|            |       |            |            |            |
|------------|-------|------------|------------|------------|
| JJH_ROH_36 | Chr11 | 47,200,001 | 48,400,000 | 1,200,000  |
| JJH_ROH_37 | Chr11 | 50,000,001 | 50,400,000 | 400,000    |
| JJH_ROH_38 | Chr11 | 57,600,001 | 58,000,000 | 400,000    |
| JJH_ROH_39 | Chr11 | 76,400,001 | 91,200,000 | 14,800,000 |
| JJH_ROH_40 | Chr12 | 43,200,001 | 44,000,000 | 800,000    |
| JJH_ROH_41 | Chr12 | 60,800,001 | 61,200,000 | 400,000    |
| JJH_ROH_42 | Chr13 | 83,600,001 | 84,240,350 | 640,350    |
| JJH_ROH_43 | Chr14 | 16,400,001 | 16,800,000 | 400,000    |
| JJH_ROH_44 | Chr14 | 52,000,001 | 52,400,000 | 400,000    |
| JJH_ROH_45 | Chr15 | 1,600,001  | 2,400,000  | 800,000    |
| JJH_ROH_46 | Chr17 | 800,001    | 1,200,000  | 400,000    |
| JJH_ROH_47 | Chr17 | 6,400,001  | 6,800,000  | 400,000    |
| JJH_ROH_48 | Chr17 | 29,600,001 | 30,000,000 | 400,000    |
| JJH_ROH_49 | Chr20 | 23,200,001 | 23,600,000 | 400,000    |
| JJH_ROH_50 | Chr20 | 38,000,001 | 38,800,000 | 800,000    |
| JJH_ROH_51 | Chr20 | 50,800,001 | 51,200,000 | 400,000    |
| JJH_ROH_52 | Chr21 | 1          | 400,000    | 400,000    |
| JJH_ROH_53 | Chr21 | 2,400,001  | 6,000,000  | 3,600,000  |
| JJH_ROH_54 | Chr21 | 6,400,001  | 10,400,000 | 4,000,000  |
| JJH_ROH_55 | Chr22 | 42,400,001 | 43,200,000 | 800,000    |
| JJH_ROH_56 | Chr23 | 34,400,001 | 34,800,000 | 400,000    |
| JJH_ROH_57 | Chr24 | 50,000,001 | 50,400,000 | 400,000    |
| JJH_ROH_58 | Chr26 | 2,000,001  | 2,800,000  | 800,000    |
| JJH_ROH_59 | Chr26 | 17,600,001 | 18,400,000 | 800,000    |
| JJH_ROH_60 | Chr26 | 22,000,001 | 22,400,000 | 400,000    |
| JJH_ROH_61 | Chr26 | 44,800,001 | 47,600,000 | 2,800,000  |
| JJH_ROH_62 | Chr27 | 42,800,001 | 45,407,902 | 2,607,902  |
| JJH_ROH_63 | Chr28 | 1          | 4,000,000  | 4,000,000  |
| JJH_ROH_64 | Chr28 | 4,400,001  | 18,000,000 | 13,600,000 |
| JJH_ROH_65 | Chr29 | 11,200,001 | 16,000,000 | 4,800,000  |

**Chikso**

| <b>Region_Name</b> | <b>Chr</b> | <b>Bin_Start</b> | <b>Bin_End</b> | <b>Size</b> |
|--------------------|------------|------------------|----------------|-------------|
| CHS_ROH_1          | Chr1       | 37,600,001       | 38,000,000     | 400,000     |
| CHS_ROH_2          | Chr1       | 54,400,001       | 54,800,000     | 400,000     |
| CHS_ROH_3          | Chr1       | 60,000,001       | 60,400,000     | 400,000     |
| CHS_ROH_4          | Chr1       | 71,600,001       | 72,400,000     | 800,000     |
| CHS_ROH_5          | Chr1       | 103,600,001      | 104,400,000    | 800,000     |
| CHS_ROH_6          | Chr2       | 42,000,001       | 42,400,000     | 400,000     |
| CHS_ROH_7          | Chr2       | 44,800,001       | 45,200,000     | 400,000     |
| CHS_ROH_8          | Chr2       | 62,000,001       | 62,400,000     | 400,000     |
| CHS_ROH_9          | Chr3       | 50,400,001       | 51,600,000     | 1,200,000   |
| CHS_ROH_10         | Chr4       | 2,400,001        | 2,800,000      | 400,000     |
| CHS_ROH_11         | Chr4       | 4,400,001        | 4,800,000      | 400,000     |
| CHS_ROH_12         | Chr4       | 34,800,001       | 35,200,000     | 400,000     |
| CHS_ROH_13         | Chr4       | 53,600,001       | 54,400,000     | 800,000     |
| CHS_ROH_14         | Chr5       | 17,200,001       | 17,600,000     | 400,000     |
| CHS_ROH_15         | Chr5       | 43,200,001       | 43,600,000     | 400,000     |
| CHS_ROH_16         | Chr5       | 45,600,001       | 46,400,000     | 800,000     |
| CHS_ROH_17         | Chr5       | 80,800,001       | 81,200,000     | 400,000     |
| CHS_ROH_18         | Chr6       | 78,400,001       | 78,800,000     | 400,000     |

|            |       |             |             |           |
|------------|-------|-------------|-------------|-----------|
| CHS_ROH_19 | Chr6  | 92,000,001  | 92,800,000  | 800,000   |
| CHS_ROH_20 | Chr7  | 21,200,001  | 21,600,000  | 400,000   |
| CHS_ROH_21 | Chr7  | 34,800,001  | 35,200,000  | 400,000   |
| CHS_ROH_22 | Chr7  | 56,800,001  | 57,600,000  | 800,000   |
| CHS_ROH_23 | Chr7  | 78,800,001  | 81,200,000  | 2,400,000 |
| CHS_ROH_24 | Chr7  | 82,400,001  | 83,200,000  | 800,000   |
| CHS_ROH_25 | Chr8  | 57,200,001  | 57,600,000  | 400,000   |
| CHS_ROH_26 | Chr9  | 19,600,001  | 20,000,000  | 400,000   |
| CHS_ROH_27 | Chr10 | 52,400,001  | 53,200,000  | 800,000   |
| CHS_ROH_28 | Chr10 | 104,000,001 | 104,305,016 | 305,016   |
| CHS_ROH_29 | Chr11 | 56,800,001  | 58,400,000  | 1,600,000 |
| CHS_ROH_30 | Chr12 | 38,800,001  | 39,200,000  | 400,000   |
| CHS_ROH_31 | Chr12 | 42,000,001  | 42,400,000  | 400,000   |
| CHS_ROH_32 | Chr12 | 43,600,001  | 44,000,000  | 400,000   |
| CHS_ROH_33 | Chr13 | 84,000,001  | 84,240,350  | 240,350   |
| CHS_ROH_34 | Chr14 | 71,600,001  | 72,000,000  | 400,000   |
| CHS_ROH_35 | Chr15 | 2,400,001   | 2,800,000   | 400,000   |
| CHS_ROH_36 | Chr17 | 44,800,001  | 45,200,000  | 400,000   |
| CHS_ROH_37 | Chr18 | 52,800,001  | 53,200,000  | 400,000   |
| CHS_ROH_38 | Chr19 | 800,001     | 1,600,000   | 800,000   |
| CHS_ROH_39 | Chr20 | 39,200,001  | 39,600,000  | 400,000   |
| CHS_ROH_40 | Chr20 | 46,800,001  | 48,000,000  | 1,200,000 |
| CHS_ROH_41 | Chr20 | 65,200,001  | 66,000,000  | 800,000   |
| CHS_ROH_42 | Chr21 | 32,400,001  | 32,800,000  | 400,000   |
| CHS_ROH_43 | Chr21 | 34,400,001  | 34,800,000  | 400,000   |
| CHS_ROH_44 | Chr23 | 400,001     | 1,200,000   | 800,000   |
| CHS_ROH_45 | Chr27 | 1           | 400,000     | 400,000   |

### *Korean Holstein*

| <b>Region_Name</b> | <b>Chr</b> | <b>Bin_Start</b> | <b>Bin_End</b> | <b>Size</b> |
|--------------------|------------|------------------|----------------|-------------|
| HOL_ROH_1          | Chr1       | 47,600,001       | 50,400,000     | 2,800,000   |
| HOL_ROH_2          | Chr1       | 70,400,001       | 70,800,000     | 400,000     |
| HOL_ROH_3          | Chr1       | 82,400,001       | 82,800,000     | 400,000     |
| HOL_ROH_4          | Chr1       | 103,600,001      | 104,000,000    | 400,000     |
| HOL_ROH_5          | Chr1       | 131,200,001      | 131,600,000    | 400,000     |
| HOL_ROH_6          | Chr2       | 89,200,001       | 89,600,000     | 400,000     |
| HOL_ROH_7          | Chr3       | 8,000,001        | 8,400,000      | 400,000     |
| HOL_ROH_8          | Chr3       | 54,800,001       | 55,200,000     | 400,000     |
| HOL_ROH_9          | Chr3       | 65,600,001       | 71,600,000     | 6,000,000   |
| HOL_ROH_10         | Chr3       | 110,400,001      | 110,800,000    | 400,000     |
| HOL_ROH_11         | Chr4       | 22,800,001       | 29,600,000     | 6,800,000   |
| HOL_ROH_12         | Chr4       | 33,200,001       | 35,600,000     | 2,400,000   |
| HOL_ROH_13         | Chr4       | 65,200,001       | 65,600,000     | 400,000     |
| HOL_ROH_14         | Chr5       | 8,800,001        | 9,200,000      | 400,000     |
| HOL_ROH_15         | Chr5       | 11,200,001       | 11,600,000     | 400,000     |
| HOL_ROH_16         | Chr5       | 19,200,001       | 34,000,000     | 14,800,000  |
| HOL_ROH_17         | Chr5       | 39,600,001       | 40,400,000     | 800,000     |
| HOL_ROH_18         | Chr5       | 60,400,001       | 67,200,000     | 6,800,000   |
| HOL_ROH_19         | Chr5       | 73,600,001       | 74,000,000     | 400,000     |
| HOL_ROH_20         | Chr5       | 75,200,001       | 75,600,000     | 400,000     |
| HOL_ROH_21         | Chr5       | 84,400,001       | 98,400,000     | 14,000,000  |

|            |       |             |             |            |
|------------|-------|-------------|-------------|------------|
| HOL_ROH_22 | Chr6  | 56,000,001  | 56,400,000  | 400,000    |
| HOL_ROH_23 | Chr6  | 71,200,001  | 71,600,000  | 400,000    |
| HOL_ROH_24 | Chr6  | 116,000,001 | 116,400,000 | 400,000    |
| HOL_ROH_25 | Chr7  | 24,800,001  | 25,200,000  | 400,000    |
| HOL_ROH_26 | Chr7  | 48,000,001  | 49,600,000  | 1,600,000  |
| HOL_ROH_27 | Chr7  | 88,400,001  | 89,600,000  | 1,200,000  |
| HOL_ROH_28 | Chr8  | 61,600,001  | 62,000,000  | 400,000    |
| HOL_ROH_29 | Chr8  | 64,800,001  | 65,600,000  | 800,000    |
| HOL_ROH_30 | Chr8  | 107,600,001 | 108,400,000 | 800,000    |
| HOL_ROH_31 | Chr9  | 17,600,001  | 18,000,000  | 400,000    |
| HOL_ROH_32 | Chr9  | 24,400,001  | 25,200,000  | 800,000    |
| HOL_ROH_33 | Chr9  | 43,200,001  | 43,600,000  | 400,000    |
| HOL_ROH_34 | Chr9  | 67,600,001  | 85,600,000  | 18,000,000 |
| HOL_ROH_35 | Chr9  | 86,000,001  | 88,000,000  | 2,000,000  |
| HOL_ROH_36 | Chr9  | 88,800,001  | 105,600,000 | 16,800,000 |
| HOL_ROH_37 | Chr10 | 400,001     | 5,600,000   | 5,200,000  |
| HOL_ROH_38 | Chr10 | 30,400,001  | 30,800,000  | 400,000    |
| HOL_ROH_39 | Chr10 | 34,800,001  | 35,200,000  | 400,000    |
| HOL_ROH_40 | Chr10 | 36,400,001  | 38,000,000  | 1,600,000  |
| HOL_ROH_41 | Chr10 | 42,000,001  | 48,800,000  | 6,800,000  |
| HOL_ROH_42 | Chr10 | 104,000,001 | 104,305,016 | 305,016    |
| HOL_ROH_43 | Chr11 | 34,000,001  | 34,400,000  | 400,000    |
| HOL_ROH_44 | Chr11 | 81,200,001  | 86,400,000  | 5,200,000  |
| HOL_ROH_45 | Chr12 | 16,800,001  | 23,200,000  | 6,400,000  |
| HOL_ROH_46 | Chr12 | 42,800,001  | 64,400,000  | 21,600,000 |
| HOL_ROH_47 | Chr13 | 400,001     | 5,200,000   | 4,800,000  |
| HOL_ROH_48 | Chr13 | 5,600,001   | 6,400,000   | 800,000    |
| HOL_ROH_49 | Chr13 | 30,400,001  | 34,800,000  | 4,400,000  |
| HOL_ROH_50 | Chr13 | 36,800,001  | 37,600,000  | 800,000    |
| HOL_ROH_51 | Chr13 | 43,600,001  | 44,000,000  | 400,000    |
| HOL_ROH_52 | Chr13 | 46,000,001  | 58,400,000  | 12,400,000 |
| HOL_ROH_53 | Chr13 | 61,200,001  | 62,400,000  | 1,200,000  |
| HOL_ROH_54 | Chr13 | 62,800,001  | 64,400,000  | 1,600,000  |
| HOL_ROH_55 | Chr13 | 65,200,001  | 71,600,000  | 6,400,000  |
| HOL_ROH_56 | Chr13 | 84,000,001  | 84,240,350  | 240,350    |
| HOL_ROH_57 | Chr14 | 6,000,001   | 6,800,000   | 800,000    |
| HOL_ROH_58 | Chr14 | 11,600,001  | 12,400,000  | 800,000    |
| HOL_ROH_59 | Chr14 | 25,200,001  | 26,000,000  | 800,000    |
| HOL_ROH_60 | Chr14 | 32,400,001  | 32,800,000  | 400,000    |
| HOL_ROH_61 | Chr14 | 44,000,001  | 44,400,000  | 400,000    |
| HOL_ROH_62 | Chr15 | 74,800,001  | 75,200,000  | 400,000    |
| HOL_ROH_63 | Chr16 | 45,200,001  | 54,800,000  | 9,600,000  |
| HOL_ROH_64 | Chr16 | 55,600,001  | 59,600,000  | 4,000,000  |
| HOL_ROH_65 | Chr18 | 3,600,001   | 4,000,000   | 400,000    |
| HOL_ROH_66 | Chr18 | 12,000,001  | 15,600,000  | 3,600,000  |
| HOL_ROH_67 | Chr18 | 34,800,001  | 35,600,000  | 800,000    |
| HOL_ROH_68 | Chr18 | 44,800,001  | 45,600,000  | 800,000    |
| HOL_ROH_69 | Chr20 | 1           | 10,000,000  | 10,000,000 |
| HOL_ROH_70 | Chr21 | 12,800,001  | 17,200,000  | 4,400,000  |
| HOL_ROH_71 | Chr22 | 1           | 400,000     | 400,000    |
| HOL_ROH_72 | Chr22 | 13,200,001  | 13,600,000  | 400,000    |
| HOL_ROH_73 | Chr22 | 20,800,001  | 27,200,000  | 6,400,000  |
| HOL_ROH_74 | Chr22 | 33,600,001  | 34,000,000  | 400,000    |
| HOL_ROH_75 | Chr23 | 1           | 400,000     | 400,000    |

|            |       |            |            |           |
|------------|-------|------------|------------|-----------|
| HOL_ROH_76 | Chr23 | 45,600,001 | 50,000,000 | 4,400,000 |
| HOL_ROH_77 | Chr23 | 50,800,001 | 52,000,000 | 1,200,000 |
| HOL_ROH_78 | Chr24 | 32,000,001 | 32,800,000 | 800,000   |
| HOL_ROH_79 | Chr25 | 37,200,001 | 39,200,000 | 2,000,000 |
| HOL_ROH_80 | Chr26 | 19,200,001 | 20,800,000 | 1,600,000 |
| HOL_ROH_81 | Chr29 | 26,400,001 | 30,400,000 | 4,000,000 |
| HOL_ROH_82 | Chr29 | 41,200,001 | 48,400,000 | 7,200,000 |

---
